# Supplementary material
Source: PubMed Central journal article supplement (PMC7845290)
Supplement: NIHMS1527400-supplement-1.pdf [file NIHMS1527400-supplement-1.pdf]

## SUPPLEMENTARY MATERIALS

### Supplementary Methods

#### Gene Expression Data and Signature Scores.

**1. MK0646 PN004 WT KRAS CRCs (n=44)** were selected from the control arm (cetuximab + irinotecan) of a Merck prospective clinical trial (MK0646)(1) followed by Affymetrix gene expression analysis. The calculated CTX-S scores, along with other molecular and clinical parameters, of these CRC patients are shown in Supplementary Table S1. **2. BMS cetuximab-treated CRCs (n=80, Khambata-Ford et al(2)).** Affymetrix gene expression data of 80 metastatic patient samples were downloaded via GEO with accession number GSE5851. The calculated signature scores were merged with other molecular and clinical parameters adopted from “Online Table 1”(2), which is shown in Supplementary Table S2. **3. In vitro cetuximab-treated CRC cell lines (n=147, Medico et al.(3)).** Affymetrix gene expression data of 154 cell lines were downloaded via GEO with accession number GSE59857. Seven cell lines without cetuximab-treated data were excluded from further analysis. The signature scores were then merged with the molecular and pharmacological annotation of the cell lines adopted from “Supplementary Data 1”(3), resulting in Supplementary Table S3A. Note that only the results of 10 µg/ml of cetuximab are shown in **Fig. 1E**, since the results for the other doses of cetuximab (1, 25, 50 and 100µg/ml) were similar, as 10 µg/ml had a 0.945 or higher (Pearson) correlation with these doses for *in vitro* growth inhibition (Supplementary Table S3B). **4. Moffitt CRC dataset (n=468).** The scores were calculated as described previously(4, 5) or above (see Supplementary Table S4). **5. TCGA CRCs (n=624/n=221(6)).** TCGA COADREAD Level 3 RNAseq data as well as the clinical Level 1 data were downloaded from the NCI GDC portal(7) ([gdac.broadinstitute.org\\_COADREAD.Merge\\_rnaseqv2\\_\\_illumina\\_hiseq\\_rnaseqv2\\_\\_unc\\_edu\\_\\_Level\\_3\\_\\_RSEM\\_genes\\_normalized\\_\\_data.Level\\_3.2016012800.0.0.tar](https://gdac.broadinstitute.org_COADREAD.Merge_rnaseqv2__illumina_hiseq_rnaseqv2__unc_edu__Level_3__RSEM_genes_normalized__data.Level_3.2016012800.0.0.tar); [gdac.broadinstitute.org\\_COADREAD.Merge\\_rnaseqv2\\_\\_illumina\\_ga\\_rnaseqv2\\_\\_unc\\_edu\\_\\_Level\\_3\\_\\_RSEM\\_genes\\_normalized\\_\\_data.Level\\_3.2016012800.0.0.tar](https://gdac.broadinstitute.org_COADREAD.Merge_rnaseqv2__illumina_ga_rnaseqv2__unc_edu__Level_3__RSEM_genes_normalized__data.Level_3.2016012800.0.0.tar); [gdac.broadinstitute.org\\_COADREAD.Merge\\_Clinical.Level\\_1.2016012800.0.0\(1\).tar](https://gdac.broadinstitute.org_COADREAD.Merge_Clinical.Level_1.2016012800.0.0(1).tar)). These data were merged according to patient barcodes, resulting in gene expression values as well as stages and MSI status for total 624 patients. In addition, mutation data of *APC*, *TP53*, *KRAS*, *NRAS* and *BRAF* of 224 CRCs reported by TCGA (2012)(6) were obtained from cBioPortal

([http://www.cbioportal.org/index.do?session\\_id=59ef9a1e498e5df2e2972472&show\\_samples=false&](http://www.cbioportal.org/index.do?session_id=59ef9a1e498e5df2e2972472&show_samples=false&)). The mutation data of 224 CRCs were then merged with those of 624 CRCs, resulting in 221 tumors that had both mutation and expression data (Supplementary Table S5). **6. Stages I-IV CRC patients samples (n=566, Marisa et al.(8)).** Affymetrix gene expression data, along with molecular and clinical parameters, of 566 Stage I-IV patient samples were downloaded via GEO with accession number GSE39582. The signature scores were calculated as described above and is shown in Supplementary Table S6. Note that of 566 patient samples, 557 had approximate relapse free survival (RFS) data.

### **Frequencies of APC and TP53 mutations in CTX-PDX datasets**

The data were obtained from two reported cetuximab-treated CRC PDX studies(9, 10) for analysis of mutations in **AP**, **A** or **P** and WT AP. In Julien et al. 52 PDX models(9), the mutation status of *APC* and *TP53* was adopted from “Figure 2”(9) (see Supplementary Table S7). For illustration purposes, the antitumor activities “+++”, “++” and “+/-” in Julien et al. PDX models were re-expressed as “CR/PR”, “SD” and “PD”, respectively, according to the pharmacological annotation as described(9). In Bertotti et al. 98 PDX models with wild-type *KRAS*, *NRAS*, *BRAF* and *PI3KCA*(10), the mutation status of *APC* and *TP53* was adopted from “Supplementary Table 4”(10) and then merged with cetuximab response (CR/PR/SD/PD) data were adopted from “Supplementary Table 10”(10) (see Supplementary Table S8).

### **Statistical Methods**

The statistical tests used in the article were given unadjusted *p* values for multiple testing, with an  $\alpha = 0.05$  chosen as the significance level, except for the mutation ranking analyses which use the Benjamini and Hochberg false discovery rate method(11). In addition, for the Welch *t* test in comparison among 7 or 5 MSI/MSS subgroups, those unadjusted *p* values remaining significant after adjustments for multi-comparisons by Holm-Bonferroni method(12) were highlighted by a maroon color. All tests were two-sided unless noted otherwise. Below is a summary of the statistical approaches used.

**(1) Survival Analysis, Correlation Analysis, and the t Test.** We performed Kaplan Meier survival analysis on various datasets as indicated, and Spearman correlation analyses as well as two-tailed Welch *t* tests on various datasets using GraphPad Prism version 6.00 (La Jolla, CA). The Tarone logrank trend test was used to test for a trend across the CTX-S quartiles for Fig. 1C and 1D and Supplementary Fig. S5 and S6.

**(2) Mutation Ranking Analysis of Moffitt 468 CRCs.** We first stratified the 468 CRCs by CTX-S score.

A mutated gene list was constructed by ranking the CTX-S scores of tumors with and without a mutation in the given gene using the  $p$ -value coming from one-sided Wilcoxon rank sum test with normal scores (SAS 9.4, Cary, NC), where the mutated tumors give rise to higher CTX-S scores. The ranking order is given according to the adjusted  $p$  values that were obtained using the Benjamini and Hochberg method(11) (see Supplementary Tables S11 and S12 for all patients (n=468) and MSS patients (n=407), respectively).

**(3) Cochran-Mantel-Haenszel (CMH) Test, Barnard Test, and distribution analysis.** The Barnard's test was used for all 2x2 tables and for all larger tables the CMH test for trend was used, as the rows and columns are ordinal data; results were obtained using SAS 9.4 (Cary, NC) (see **Table 3**, Supplementary Tables S10, S13-S19, and S22). The distribution and the individual chi-square ( $X^2$ ) contribution analysis of stages and histotypes as well as other clinic-pathological parameters were also performed on Moffitt CRCs. There is significantly higher or lower observation than expectation:  $\uparrow(\downarrow)$  for  $p<0.05$ ;  $\uparrow\uparrow(\downarrow\downarrow)$  for  $p<0.01$ ;  $\uparrow\uparrow\uparrow(\downarrow\downarrow\downarrow)$  for  $p<0.001$ ; based on individual chi-square ( $X^2$ ) contribution from the table cell. Critical chi-square values are 3.84 for  $p<0.05$ ; 6.63 for  $p<0.01$ ; 10.83 for  $p<0.001$ . Note that Nonparametric multiple comparison Dunn test was applied for age across the groups.

**(4) CMS classification.** Moffitt 458 CRCs were classified by combining the Random Forest classification (RF) and the single sample predictor (SSP) classification methods as described in Guinney et al(5, 13). The method for resolving discrepant classifications between the two methods is detailed below (also see Supplementary Table S21).

*Rules for Resolving Two Classification Methods, with Rationale*

1. 10 patients lacked data for classification. Percentages below based on 458 evaluable samples
2. If both RF and SSP agree, that is the CMS classification (N=331, 72%)
3. If one method classified the sample into CMS1-CMS3 and the other method was NA, then use the CMS1-3 selection; N=47 (10%), classification determined by RF for this rule, N=35 (8%), classification determined by SSP method
4. If RF=CMS4 and SSP = NA, then classify the 17 samples (4%) as NA. 64/116 of our CMS2-classified patients have TP53 mutations with alternate allele rates  $\geq 50\%$  (likely allelic loss), compared to 2/17 of these patients

5. There are N=28 (6%) samples for which there were direct CMS classification conflicts. Reasons for selections above:
- CMS1 when RF = CMS3, SSP = CMS1; 8/9 patients were MSI-H, and 5/9 had BRAF mutations, and these are highly CMS1-associated features
  - CMS3, when RF = CMS3 and SSP = CMS2; 10/15 of the patients have KRAS mutations
  - CMS1, when RF=CMS4, and SSP = CMS1; all 3 patients are BRAF-mutated MSI-H patients
  - CMS2, when RF=CMS4, and SSP = CMS2; this patient could have been classified either way

## List of Supplementary Figures

| Supplementary Figures | Figure Description                                                                                                                                                                                                                                                                                                                                                                                                                                                                                                                                              | Page No. |
|-----------------------|-----------------------------------------------------------------------------------------------------------------------------------------------------------------------------------------------------------------------------------------------------------------------------------------------------------------------------------------------------------------------------------------------------------------------------------------------------------------------------------------------------------------------------------------------------------------|----------|
| <b>Fig. S1</b>        | Summary of derivation and validation of the cetuximab sensitivity (CTX-S) signature score.                                                                                                                                                                                                                                                                                                                                                                                                                                                                      | 8        |
| <b>Fig. S2</b>        | Development of the 24-gene <i>APC</i> mutation-specific Wnt pathway score on Moffitt458 CRCs ( <b>A</b> ). Comparison of 64-gene or 24-gene Wnt pathway scores between mutant and wild-type <i>APC</i> tumors in Moffitt (n=458) ( <b>B</b> ) and TCGA (n=221) ( <b>C</b> ) CRCs.                                                                                                                                                                                                                                                                               | 9        |
| <b>Fig. S3</b>        | Kaplan Meier (KM) survival (PFS) analysis by higher vs. lower CTX-S scores in MK0646-PN004 CRCs (n=44).                                                                                                                                                                                                                                                                                                                                                                                                                                                         | 10       |
| <b>Fig. S4</b>        | A diagram of the CTX-S scores (from high to low) vs. cetuximab responses (CR/PR, SD, PD or UTD) in Khambata-Ford et al. (2007) cetuximab-treated CRCs (n=80).                                                                                                                                                                                                                                                                                                                                                                                                   | 11       |
| <b>Fig. S5</b>        | Kaplan Meier survival (OS) analysis by the CTX-S quartile scores was performed in Moffitt all stage patients (n=468) ( <b>A</b> ) and wild-type (WT) RAS patients (n=264) ( <b>B</b> ). OS – overall survival.                                                                                                                                                                                                                                                                                                                                                  | 12       |
| <b>Fig. S6</b>        | Kaplan Meier survival (RFS) analysis by the CTX-S quartile scores was performed in Marisa et al. (2013) all stage CRC patients (n=557) ( <b>A</b> ) and wild-type (WT) RAS patients (n=322) ( <b>B</b> ).                                                                                                                                                                                                                                                                                                                                                       | 13       |
| <b>Fig. S7</b>        | The 24-gene Wnt pathway score was significantly correlated with <i>in vitro</i> cetuximab effect.                                                                                                                                                                                                                                                                                                                                                                                                                                                               | 14       |
| <b>Fig. S8</b>        | The cetuximab sensitivity (CTX-S) score was significantly higher in MUT <i>APC</i> than WT <i>APC</i> tumors in the Moffitt CRCs. Comparison between MUT <i>APC</i> and WT <i>APC</i> tumors was performed for all stage patients (n=468) and Stage IV patients (n=110), respectively ( <b>A</b> and <b>D</b> ). Comparison was also made when MUT <i>APC</i> and WT <i>APC</i> tumors were further divided into MUT RAS and WT RAS ( <b>B</b> and <b>E</b> ) or MSI and MSS ( <b>C</b> and <b>F</b> ) subgroups.                                               | 15       |
| <b>Fig. S9</b>        | Comparison of the cetuximab sensitivity (CTX-S) score between mutant and wild-type <i>APC</i> tumors ( <b>A</b> ), between “mut <i>APC</i> +mut <i>TP53</i> ”, “mut <i>APC</i> ”, “mut <i>TP53</i> ” and “wt <i>APC</i> +wt <i>TP53</i> ” tumors ( <b>B</b> ), or between wtRAS, APK(N) and other mutRAS tumors without APK(N) ( <b>C</b> ) in the TCGA dataset (n=221). The CTX-S scores (left panel) as well as the percentage of “mut <i>APC</i> +mut <i>TP53</i> ”(right panel) were also compared between MSI (MSI-H) and MSS tumors (n=220) ( <b>D</b> ). | 16       |
| <b>Fig. S10</b>       | Comparison of the cetuximab sensitivity (CTX-S) score among 1 MSI and 4 MSS subgroups in TCGA CRCs (n=220) ( <b>A</b> ) and in Moffitt Stage IV (n=110) CRCs ( <b>B</b> ).                                                                                                                                                                                                                                                                                                                                                                                      | 17       |
| <b>Fig. S11</b>       | The Left (L) vs. Right (R) comparison of the cetuximab sensitivity (CTX-S) scores in among the seven MSI/MSS subgroups in Moffitt (n=464) CRCs.                                                                                                                                                                                                                                                                                                                                                                                                                 | 18       |

## List of Supplementary Tables

| Supplementary Tables | Table Description                                                                                                                                                                                                                                                                    | Page No. |
|----------------------|--------------------------------------------------------------------------------------------------------------------------------------------------------------------------------------------------------------------------------------------------------------------------------------|----------|
| <b>Table S1</b>      | MK0646-PN004 WT <i>KRAS</i> cetuximab & irinotecan-treated CRCs (n=44)                                                                                                                                                                                                               | 19-20    |
| <b>Table S2</b>      | Khamabata-Ford et al. cetuximab-treated CRCs (n=80) ---cetuximab response (CR/PR/SD/PD), progression-free survival, <i>KRAS</i> mutation, and signature scores                                                                                                                       | 21-22    |
| <b>Table S3</b>      | Medico et al. CRC cell lines (n=147) --- <b>A.</b> MSI status, <i>KRAS/NRAS/BRAF</i> mutations, <i>in vitro</i> cetuximab effect (%), and signature scores; <b>B.</b> Pearson correlation analysis of <i>in vitro</i> growth inhibition (%) by 1, 10, 25, 50 and 100 µg/ml cetuximab | 23-26    |
| <b>Table S4</b>      | Moffitt CRCs (n=468) ---Stages, MSI status, driver mutations and signature scores                                                                                                                                                                                                    | 27-37    |
| <b>Table S5</b>      | TCGA CRCs (n=624 including 221 samples from TCGA (2012) ---Stages, MSI status, driver mutations and signature scores                                                                                                                                                                 | 38-50    |
| <b>Table S6</b>      | Marisa et al. CRCs (n=566) ---Stages, driver mutations and signature scores                                                                                                                                                                                                          | 51-60    |
| <b>Table S7</b>      | Julien et al. cetuximab-treated CRC PDX models (n=52)---cetuximab response (CR/PR/SD/PD), MSI and <i>APC/TP53/KRAS/BRAF</i> mutation status, and frequency scores of mut <i>APC</i> /mut <i>TP53</i>                                                                                 | 61-62    |
| <b>Table S8</b>      | Bertotti et al. cetuximab-treated CRC PDX models having wild-type <i>KRAS</i> , <i>NRAS</i> , <i>BRAF</i> and <i>PI3KCA</i> (n=98)---cetuximab response (CR/PR/SD/PD), <i>APC</i> and <i>TP53</i> mutation status, and frequency scores of mut <i>APC</i> /mut <i>TP53</i>           | 63-65    |
| <b>Table S9</b>      | Gene (and gene_id) lists of four signature scores                                                                                                                                                                                                                                    | 66-68    |
| <b>Table S10</b>     | Validation of the cetuximab sensitivity (CTX-S) score by Barnard's exact test Cochran-Mantel-Haenszel test in two independent cetuximab treated CRC sets. <b>A.</b> Merck PN004 (n=41). <b>B,C.</b> Khambata-Ford et al. (n=80).                                                     | 69-70    |
| <b>Table S11</b>     | Mutation ranking of Moffitt 468 CRCs by the cetuximab sensitivity score.                                                                                                                                                                                                             | 71-94    |
| <b>Table S12</b>     | Mutation ranking of Moffitt 407 MSS CRCs by the cetuximab sensitivity score                                                                                                                                                                                                          | 95-114   |
| <b>Table S13</b>     | Cochran-Mantel-Haenszel trend test of the CTX-S scores by quartiles (4 <sup>th</sup> , highest; 1 <sup>st</sup> , lowest) for mutant forms of <i>APC</i> and <i>TP53</i> as well as primary tumor location                                                                           | 115      |
| <b>Table S14</b>     | Barnard test on the frequency of "mut <i>APC</i> + mut <i>TP53</i> " (A+ P) by the MSI/MSS status in Moffitt (n=468) and TCGA (n=220) CRCs                                                                                                                                           | 116-117  |
| <b>Table S15</b>     | Cochran-Mantel-Haenszel test or Barnard test on the frequencies of MSI and "mut <i>APC</i> + mut <i>TP53</i> " (A + P) by the sidedness (Left vs Right) in Moffitt CRCs (n=464)                                                                                                      | 118-126  |
| <b>Table S16</b>     | Cochran-Mantel-Haenszel test or Barnard test on the frequencies of MSI and "mut <i>APC</i> + mut <i>TP53</i> " (A+ P) by the sidedness (Left vs Right) in TCGA CRCs (n=217)                                                                                                          | 127-131  |
| <b>Table S17</b>     | Distribution of <i>APC/TP53/KRAS/NRAS/BRAF</i> subgroups by CTX-S Quartiles (Left vs. Right) in Moffitt CRCs (n=464)                                                                                                                                                                 | 132-134  |

|                  |                                                                                                                                                                                  |         |
|------------------|----------------------------------------------------------------------------------------------------------------------------------------------------------------------------------|---------|
| <b>Table S18</b> | Barnard test on the frequencies of single driver genes ( <i>APC</i> , <i>TP53</i> , <i>KRAS/NRAS</i> , or <i>BRAF</i> ) by the sidedness (Left vs Right) in Moffitt CRCs (n=464) | 135-143 |
| <b>Table S19</b> | Barnard test on the frequencies of single driver genes ( <i>APC</i> , <i>TP53</i> , <i>KRAS/NRAS</i> , or <i>BRAF</i> ) by the sidedness (Left vs Right) in TCGA CRCs (n=217)    | 144-149 |
| <b>Table S20</b> | Frequencies (and percentages) of right-sided tumors, stages, distant metastasis, and histotypes                                                                                  | 150     |
| <b>Table S21</b> | CMS classification results for Moffitt 468                                                                                                                                       | 151-152 |
| <b>Table S22</b> | Additional Cochran-Mantel-Haenszel test on cetuximab (CTX) response by frequencies of mutAPC and/or mutTP53 in cetuximab-treated CRC PDX models                                  | 153     |

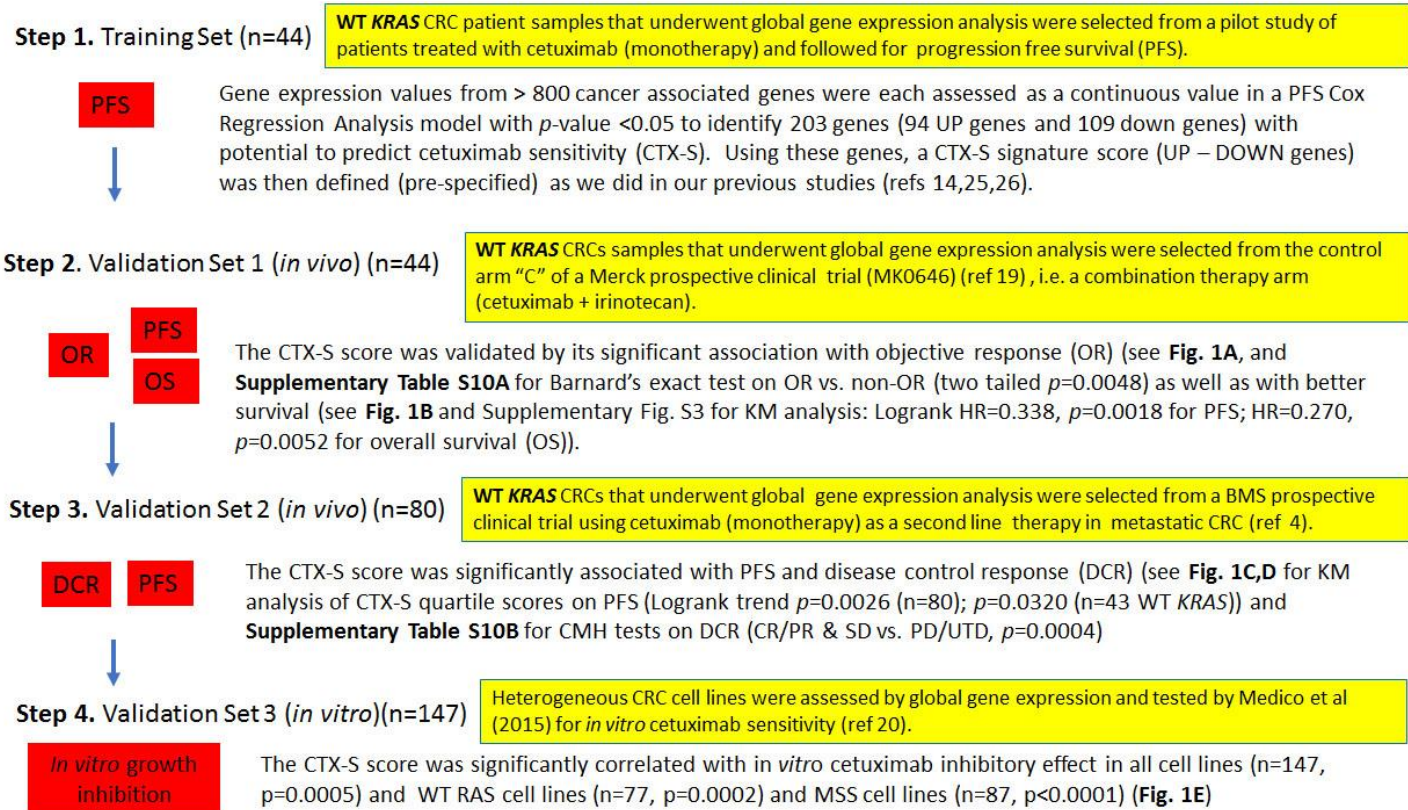

**Supplementary Fig. S1. Summary of derivation and validation of the cetuximab sensitivity (CTX-S) signature score.** Note: ref numbers indicated here are from the main manuscript references.



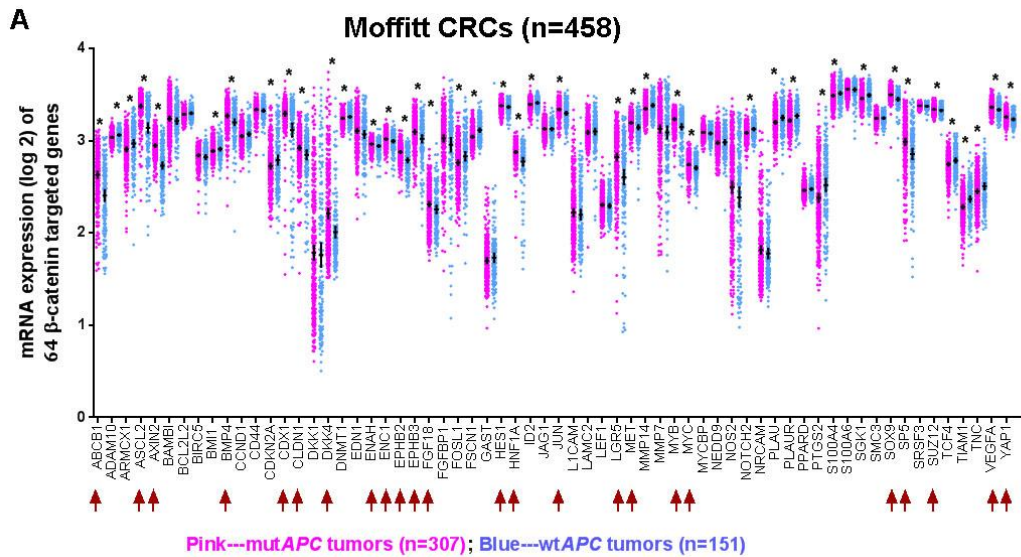

**B** **Moffitt CRCs (n=458)**

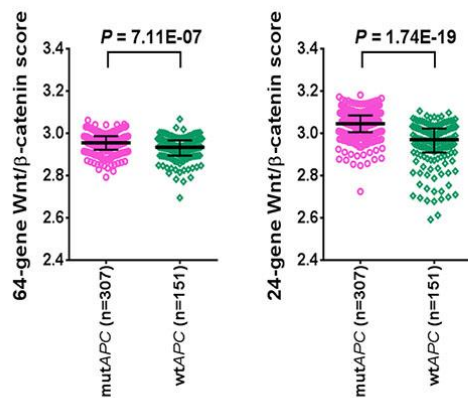

**C** **TCGA CRCs (n=221)**

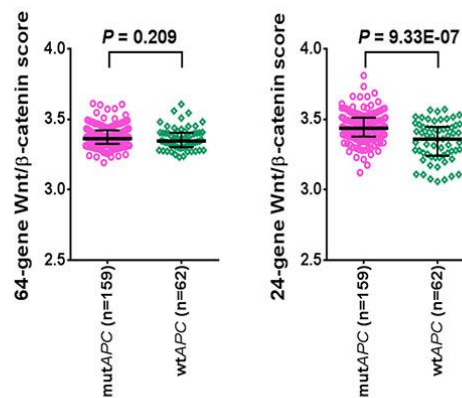

**Supplementary Fig. S2. A. Development of the 24-gene APC mutation-specific Wnt pathway score on Moffitt458 CRCs.** Note: Of 468 Moffitt CRCs, 10 samples without appropriate microarray data of gene expression values were excluded. Bars represent Mean with 95% CI; \*,  $P < 0.05$  for two-tailed Welch  $t$  test for comparison between mutant (mut) and wild-type (wt) APC tumors. Of 64  $\beta$ -catenin targeted (up) genes(14), the maroon allows represent 24 genes whose mean (and median) expression in mut APC tumors is significantly higher ( $P < 0.05$ ) than that in wt APC tumors. **Comparison of 64-gene or 24-gene Wnt pathway scores between mut and wtAPC tumors in Moffitt (n=458) (B) and TCGA (n=221) (C) CRCs.** Bars represent Median with interquartile range;  $P$  values are for two-tailed Welch  $t$  test.

### MK0646 PN004 WT KRAS (n=42)

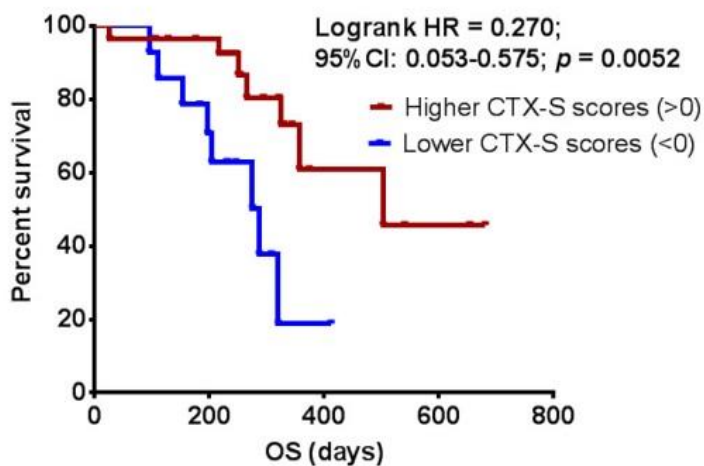

| CTX-S Score        | N  | # deaths | # censored | Median survival (days) |
|--------------------|----|----------|------------|------------------------|
| Higher scores (>0) | 28 | 7        | 21         | 503                    |
| Lower scores (<0)  | 14 | 8        | 6          | 287                    |

**Supplementary Fig. S3. Kaplan Meier (KM) survival (PFS) analysis by higher vs. lower CTX-S scores in MK0646-PN004 CRCs (n=42).** See Supplementary Table S1 for detailed data description. Note: of 44 CRCs, two samples with adjusted CTX-S scores near 0.00 as shown in **Fig. 1A** were excluded from KM analysis.

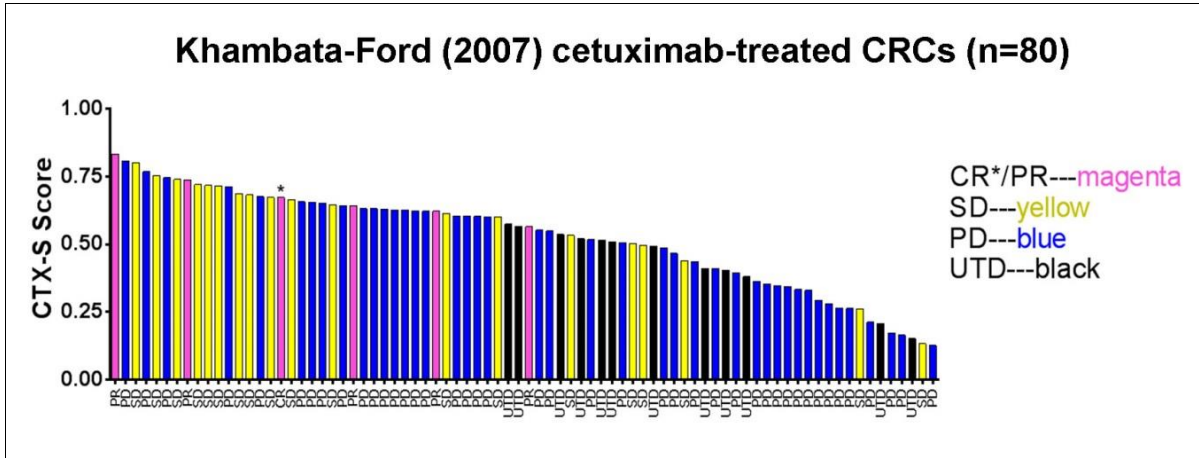

**Supplementary Fig. S4.** A diagram of the CTX-S scores (from high to low) vs. cetuximab responses (CR/PR, SD, PD or UTD) in Khambata-Ford et al. (2007) cetuximab-treated CRCs (n=80) (2). \*CR – complete response; PR – partial response; SD – stable disease; PD – progressed disease; UTD – undetermined. The significant association of the CTX-S score with improved response (CR/PR and SD) was supported by the Cochran-Mantel-Haenszel test (see Supplementary Table S10B,C).

## OS analysis on Moffitt CRCs by CTX-S quartile scores

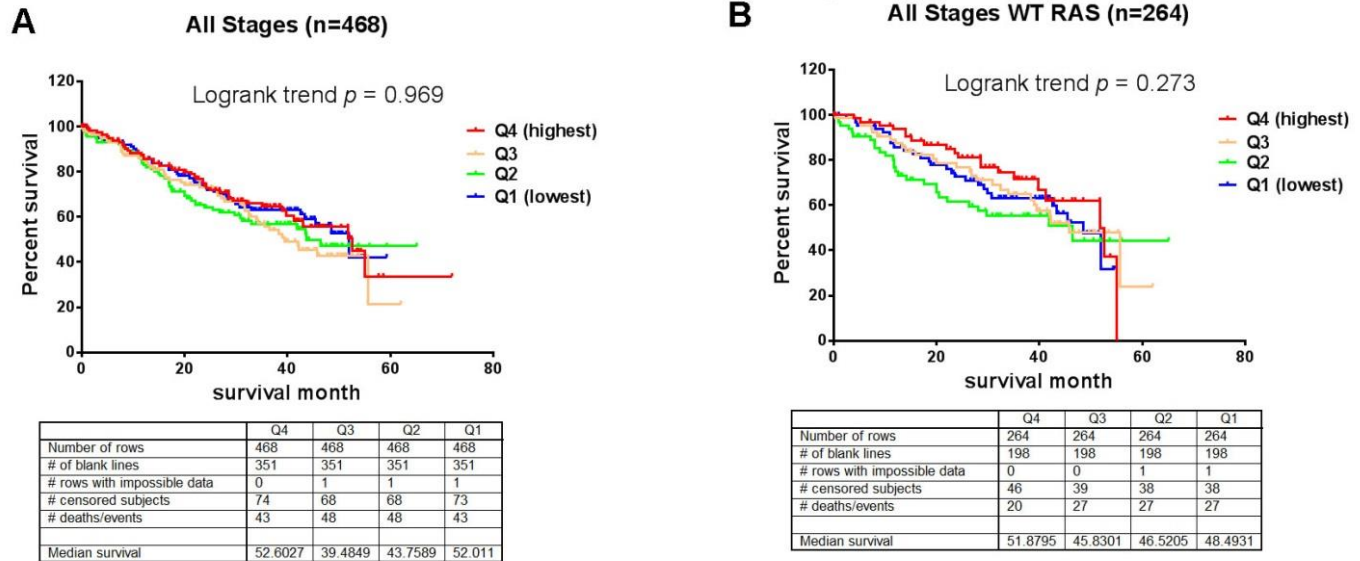

**Supplementary Fig S5. Kaplan Meier survival (OS) analysis by the CTX-S quartile scores** was performed in Moffitt all stage CRC patients (n=468) (5) (A) and wild-type (WT) RAS patients (n=264) (B). OS – overall survival.

## RFS analysis on Marisa et al CRC dataset by CTX-S quartile scores

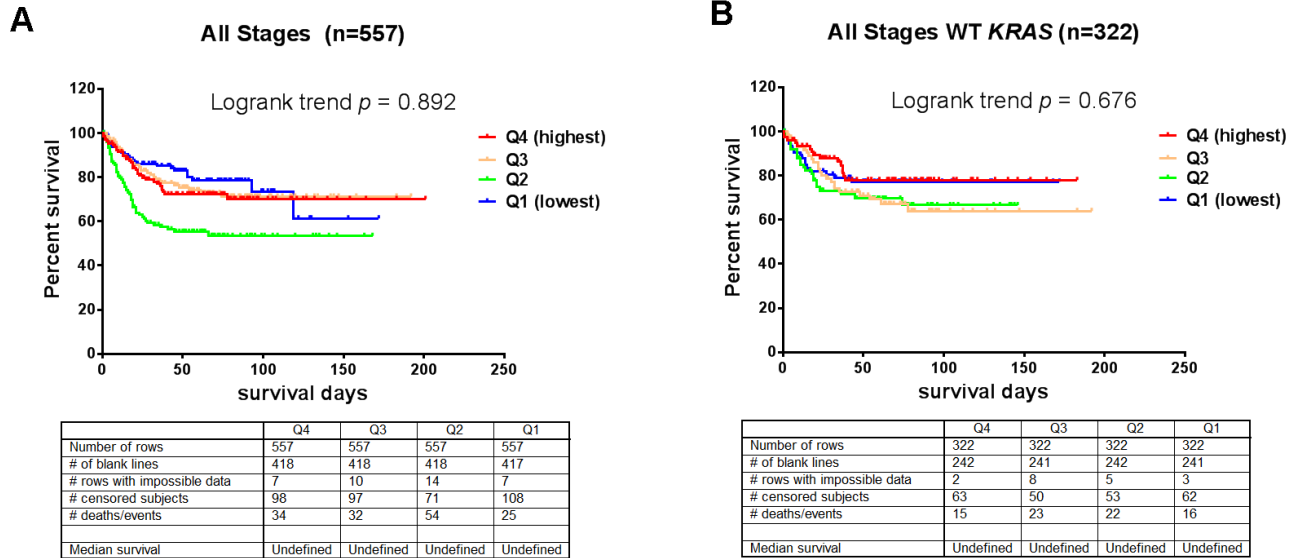

**Supplementary Fig S6. Kaplan Meier survival (RFS) analysis by the CTX-S quartile scores** was performed in Marisa et al. (8) all stage CRC patients (n=557) (A) and wild-type (WT) RAS patients (n=322) (B). RFS – relapse free survival. Note: Of 566 Marisa et al. CRCs, 557 patients who had appropriate RFS data were included in the KM analysis.

## 64-gene/24-gene Wnt pathway scores vs. *In vitro* growth inhibition by 10 $\mu$ g CTX

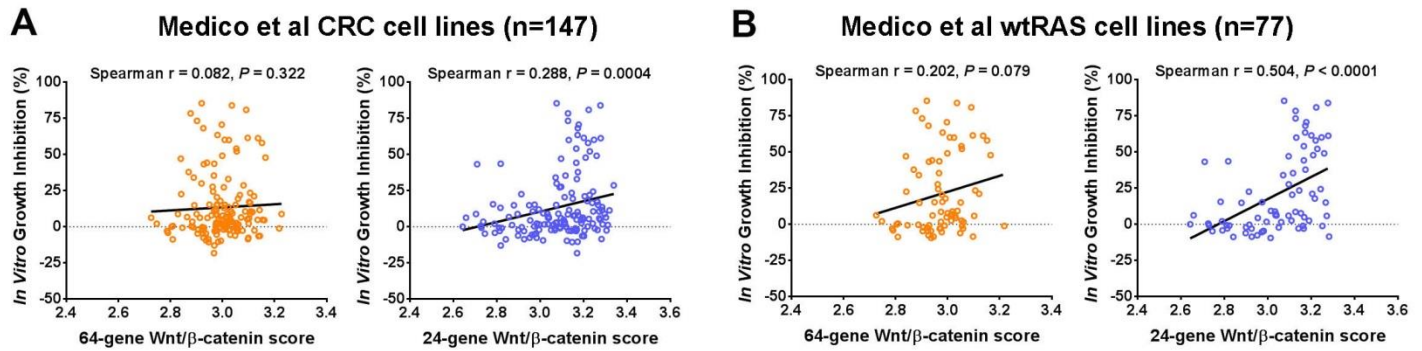

**Supplementary Fig. S7. The 24-gene Wnt pathway score was significantly correlated with *in vitro* cetuximab effect.** Correlation analysis of the 64-gene or 24-gene Wnt pathway scores with *in vitro* growth inhibition (%) by 10  $\mu$ g/ml cetuximab on all cetuximab-treated cell lines (n=147) (**A**) and those with wild-type RAS (n=77) (**B**), respectively. Note: Similar correlations were also at 1, 25, 50 and 100 $\mu$ g/ml of cetuximab, respectively. wtRAS – patients with wild-type *KRAS/NRAS*.

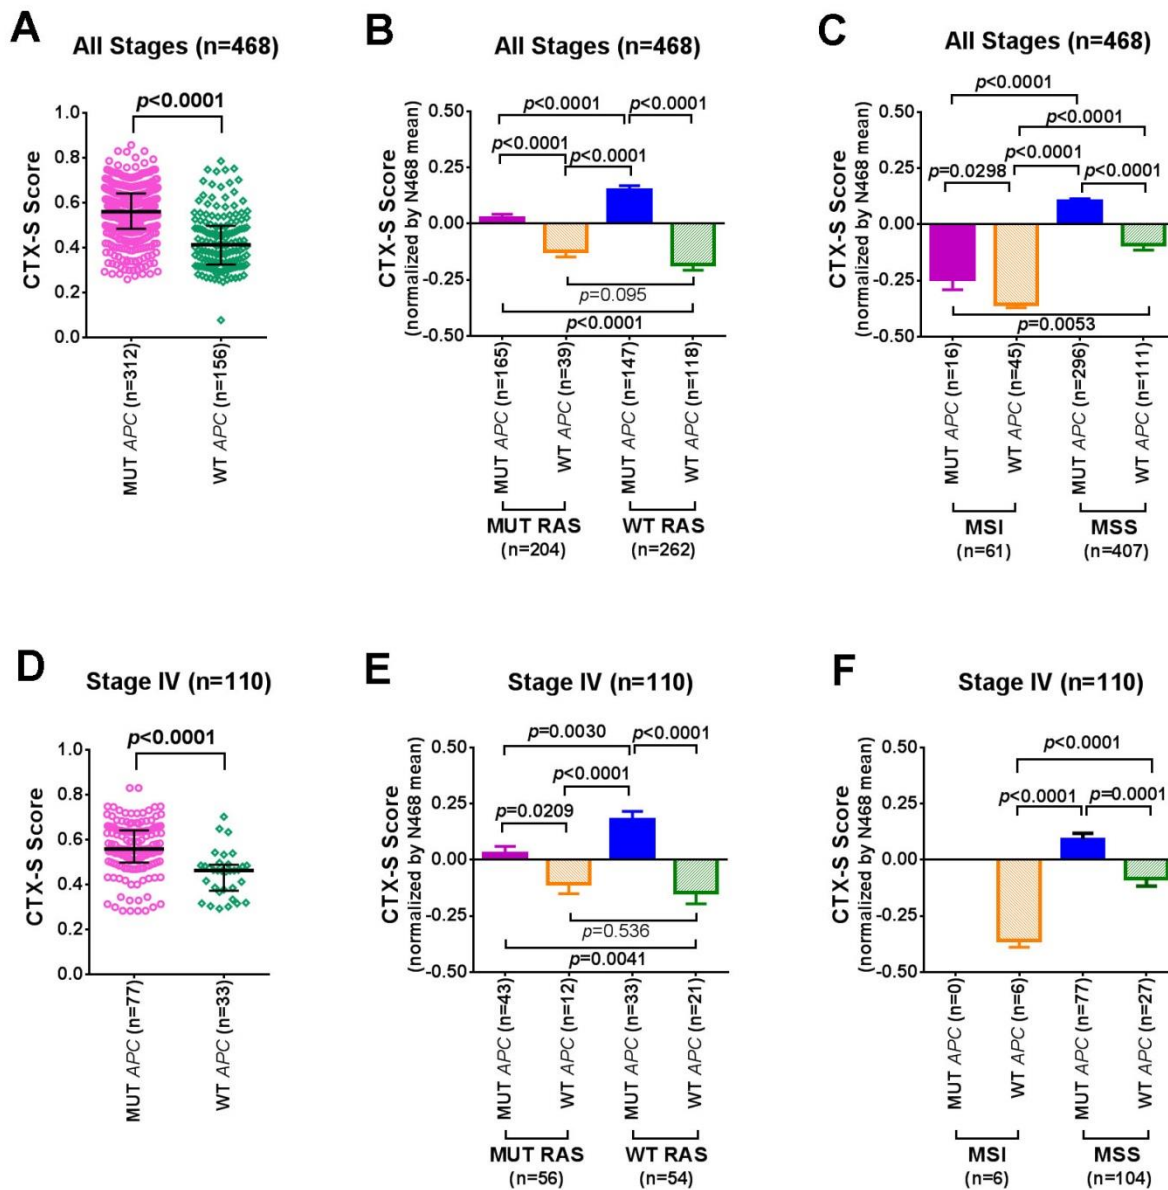

**Supplementary Fig. S8. The cetuximab sensitivity (CTX-S) score was significantly higher in MUT APC than WT APC tumors in the Moffitt CRCs.** Comparison between MUT APC and WT APC tumors was performed for all stage patients (n=468) and Stage IV patients (n=110), respectively (**A** and **D**). Bars represent Median with interquartile range. Comparison was also made when MUT APC and WT APC tumors were further divided into MUT RAS and WT RAS (**B** and **E**) or MSI and MSS (**C** and **F**) subgroups. Note: MUT – mutant; WT – wild-type; WT RAS – patients with wild-type *KRAS/NRAS*. In **B**, **C**, **E**, and **F**, the CTX-S scores were normalized by the mean of 468 CRCs, and bars represent Mean with standard errors (SEM). All *p* values shown in **A-F** are for two-tailed Welch *t* test.

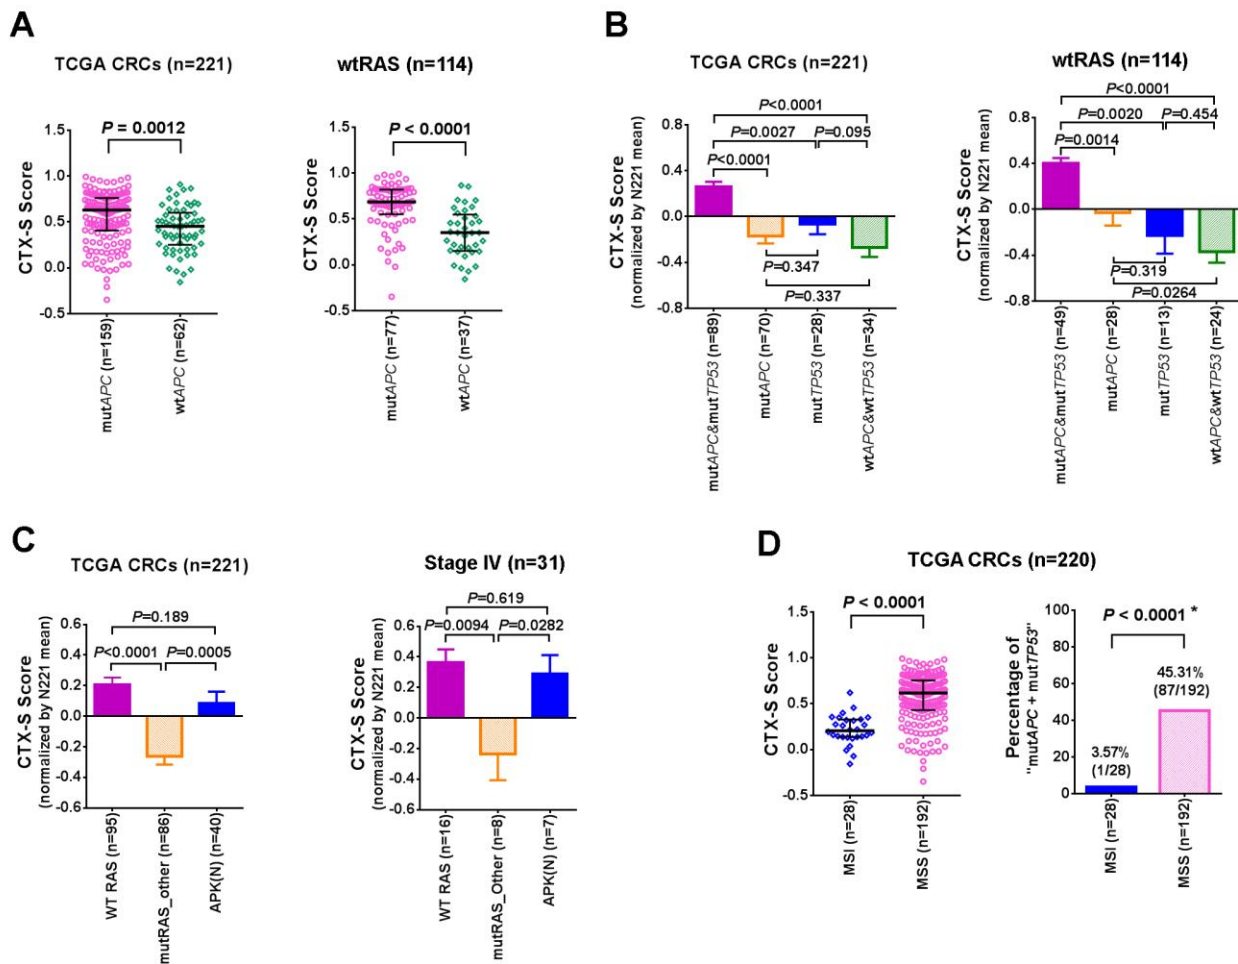

**Supplementary Fig. S9. A.** The cetuximab sensitivity (CTX-S) score was significantly higher in mutant than wtAPC tumors in the TCGA CRC dataset (either all patients or wtRAS patients). Bars represent Median with interquartile range. **B.** The CTX-S scores were also significantly higher in “mutAPC+mutTP53” tumors than “mutAPC”, “mutTP53” or “wtAPC+wtTP53” tumors. **C.** Comparison of the scores were also performed between wtRAS, APK(N) (mutAPC+mutTP53+mutKRAS(NRAS)) and other mutRAS tumors without APK(N). In **B** and **C**, the CTX-S scores were normalized by the mean of 221 CRCs, and bars represent Mean with standard errors (SEM). **D.** The CTX-S scores were compared between MSI (MSI-H) and MSS tumors (left panel). Bars represent Median with interquartile range. The comparison was also made for the percentage of “mutAPC+mutTP53”, with “\*” representing a significant difference by Barnard’s exact test (right panel) (see Supplementary Table S14). All *P* values shown in **A-D** are for two-tailed Welch *t* test.



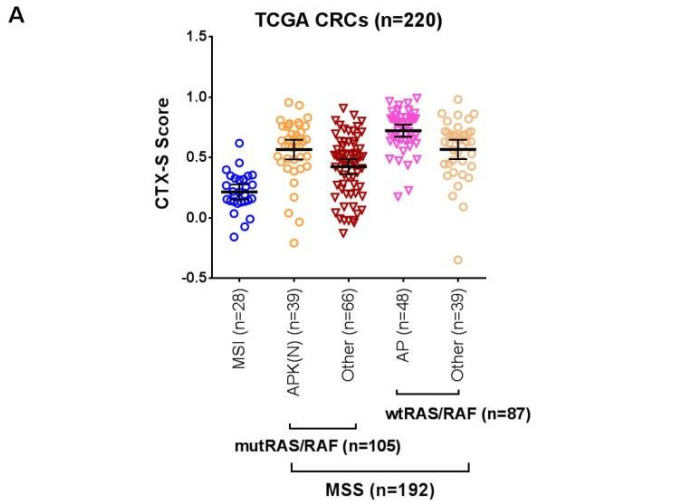

|                             | MSS(192)   |               |                         |           |                        |
|-----------------------------|------------|---------------|-------------------------|-----------|------------------------|
| P value (t test)            | MSI (n=28) | APK(N) (n=39) | mutRAS/RAF_other (n=66) | AP (n=48) | wtRAS/RAF_other (n=39) |
| MSI (n=28)                  |            | < 0.0001      | < 0.0001                | < 0.0001  | < 0.0001               |
| MSS_APK(N) (n=39)           | < 0.0001   |               | 0.0069                  | 0.0015    | 0.975                  |
| MSS_mutRAS/RAF_other (n=66) | < 0.0001   | 0.0069        |                         | < 0.0001  | 0.0057                 |
| MSS_AP (n=48)               | < 0.0001   | 0.0015        | < 0.0001                |           | 0.0015                 |
| MSS_wtRAS/RAF_other (n=39)  | < 0.0001   | 0.975         | 0.0057                  | 0.0015    |                        |

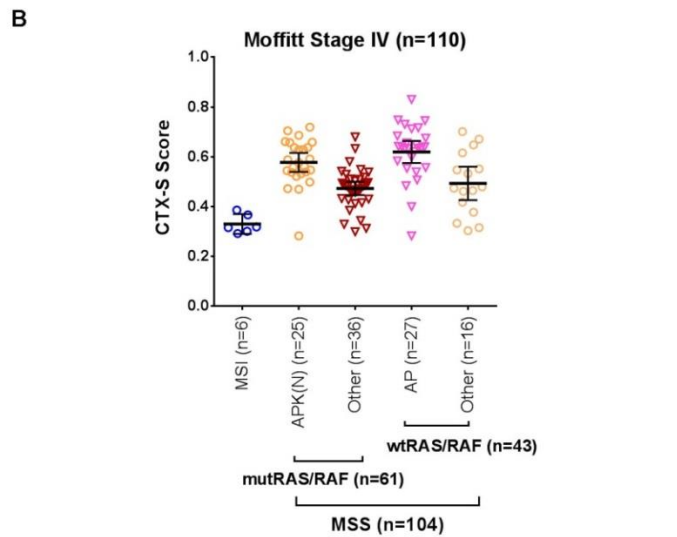

|                             | MSS(104)  |               |                         |           |                        |
|-----------------------------|-----------|---------------|-------------------------|-----------|------------------------|
| P value (t test)            | MSI (n=6) | APK(N) (n=25) | mutRAS/RAF_other (n=36) | AP (n=27) | wtRAS/RAF_other (n=16) |
| MSI (n=6)                   |           | <0.0001       | <0.0001                 | <0.0001   | 0.0002                 |
| MSS_APK(N) (n=25)           | <0.0001   |               | <0.0001                 | 0.1471    | 0.0295                 |
| MSS_mutRAS/RAF_other (n=36) | <0.0001   | <0.0001       |                         | <0.0001   | 0.5575                 |
| MSS_AP (n=27)               | <0.0001   | 0.1471        | <0.0001                 |           | 0.0025                 |
| MSS_wtRAS/RAF_other (n=16)  | 0.0002    | 0.0295        | 0.5575                  | 0.0025    |                        |

**Supplementary Fig. S10. A.** Comparison of the cetuximab sensitivity (CTX-S) scores among 1 MSI and 4 MSS subgroups in TCGA CRCs (n=220). Note: one sample without MSI status information was excluded from TCGA dataset (n=221). Bars represent Median with interquartile range. **B.** Comparison of the CTX-S scores among the five MSI/MSS subgroups in Moffitt Stage IV (n=110) CRCs. Bars represent Median with interquartile range. *P* values are for two-tailed Welch *t* test. *P* values that are significant after adjustments for multi-comparisons by Holm-Bonferroni Method are highlighted by maroon color.

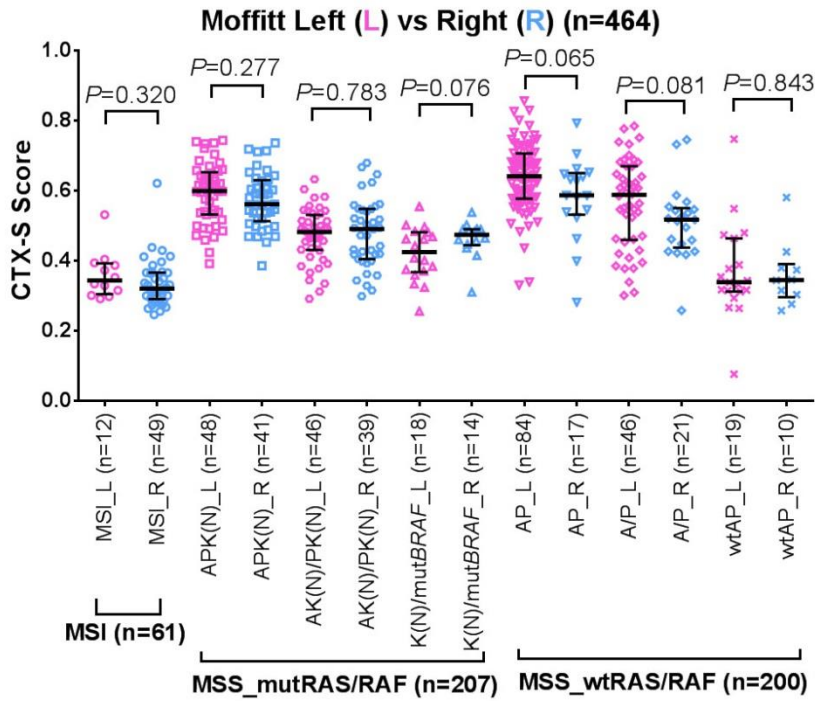

**Supplementary Fig. S11.** The Left (L) vs. Right (R) comparison of the cetuximab sensitivity (CTX-S) scores in among the seven MSI/MSS subgroups in Moffitt (n=464) CRCs. Bars represent Median with interquartile range. Unadjusted *P* values are for two-tailed Welch *t* test.

**Supplementary Table S1. MK0646-PN004 WT KRAS cetuximab & irinotecan-treated CRCs (n=44) ---**  
 objective response (OR), progression free survival (PFS), overall survival (OS) and CTX-S scores

| AGE | SEX | RACE         | ECOG | diagnosis     | KRAS      | treatment                        | OR | PFS, days | PFS, censor | PFS, event          | OS, days | OS, censor | OS, event | CTX-S Score |
|-----|-----|--------------|------|---------------|-----------|----------------------------------|----|-----------|-------------|---------------------|----------|------------|-----------|-------------|
| 44  | M   | WHITE        | 1    | COLON CANCER  | Wild-type | Placebo + cetuximab + irinotecan | 0  | 26        | 0           | Death               | 26       | 0          | Death     | 0.58694     |
| 48  | M   | ASIAN        | 1    | COLON CANCER  | Wild-type | Placebo + cetuximab + irinotecan | 0  | 111       | 0           | Death               | 111      | 0          | Death     | 0.22217     |
| 53  | M   | WHITE        | 1    | RECTAL CANCER | Wild-type | Placebo + cetuximab + irinotecan | 0  | 36        | 1           | No Progression      | 174      | 1          | No Death  | 0.36834     |
| 68  | M   | WHITE        | 0    | RECTAL CANCER | Wild-type | Placebo + cetuximab + irinotecan | 0  | 168       | 1           | No Progression      | 232      | 1          | No Death  | 0.34189     |
| 73  | M   | ASIAN        | 1    | COLON CANCER  | Wild-type | Placebo + cetuximab + irinotecan | 0  | 85        | 1           | No Progression      | 176      | 1          | No Death  | 0.43578     |
| 51  | F   | ASIAN        | 1    | RECTAL CANCER | Wild-type | Placebo + cetuximab + irinotecan | 0  | 126       | 1           | No Progression      | 246      | 1          | No Death  | 0.20215     |
| 71  | M   | ASIAN        | 0    | COLON CANCER  | Wild-type | Placebo + cetuximab + irinotecan | 1  | 251       | 1           | No Progression      | 330      | 1          | No Death  | 0.45171     |
| 56  | M   | ASIAN        | 0    | COLON CANCER  | Wild-type | Placebo + cetuximab + irinotecan | 0  | 81        | 1           | No Progression      | 106      | 1          | No Death  | 0.38315     |
| 71  | M   | ASIAN        | 1    | COLON CANCER  | Wild-type | Placebo + cetuximab + irinotecan | 1  | 169       | 1           | No Progression      | 218      | 1          | No Death  | 0.52523     |
| 58  | M   | ASIAN        | 1    | RECTAL CANCER | Wild-type | Placebo + cetuximab + irinotecan | 1  | 129       | 1           | No Progression      | 223      | 1          | No Death  | 0.4585      |
| 58  | M   | ASIAN        | 0    | COLON CANCER  | Wild-type | Placebo + cetuximab + irinotecan | 1  | 206       | 1           | No Progression      | 654      | 1          | No Death  | 0.45008     |
| 35  | F   | ASIAN        | 0    | RECTAL CANCER | Wild-type | Placebo + cetuximab + irinotecan | 1  | 289       | 1           | No Progression      | 503      | 0          | Death     | 0.39062     |
| 57  | F   | WHITE        | 1    | COLON CANCER  | Wild-type | Placebo + cetuximab + irinotecan | 1  | 160       | 1           | No Progression      | 246      | 1          | No Death  | 0.44322     |
| 77  | M   | WHITE        | 1    | RECTAL CANCER | Wild-type | Placebo + cetuximab + irinotecan | 1  | 1         | 1           | No Progression      | 183      | 1          | No Death  | 0.21684     |
| 77  | F   | WHITE        | 0    | RECTAL CANCER | Wild-type | Placebo + cetuximab + irinotecan | 1  | 91        | 1           | No Progression      | 232      | 1          | No Death  | 0.48539     |
| 44  | M   | WHITE        | 1    | COLON CANCER  | Wild-type | Placebo + cetuximab + irinotecan | 1  | 64        | 1           | No Progression      | 288      | 1          | No Death  | 0.3604      |
| 60  | M   | WHITE        | 1    | RECTAL CANCER | Wild-type | Placebo + cetuximab + irinotecan | 1  | 250       | 1           | No Progression      | 321      | 1          | No Death  | 0.40955     |
| 60  | F   | WHITE        | 1    | RECTAL CANCER | Wild-type | Placebo + cetuximab + irinotecan | 1  | 293       | 1           | No Progression      | 344      | 1          | No Death  | 0.51645     |
| 64  | M   | WHITE        | 0    | COLON CANCER  | Wild-type | Placebo + cetuximab + irinotecan | 0  | 169       | 0           | Progressive Disease | 246      | 1          | No Death  | 0.37565     |
| 64  | M   | WHITE        | 0    | RECTAL CANCER | Wild-type | Placebo + cetuximab + irinotecan | 1  | 324       | 0           | Progressive Disease | 540      | 1          | No Death  | 0.43803     |
| 71  | F   | WHITE        | 1    | COLON CANCER  | Wild-type | Placebo + cetuximab + irinotecan | 0  | 35        | 0           | Progressive Disease | 95       | 0          | Death     | 0.25557     |
| 73  | M   | WHITE        | 0    | COLON CANCER  | Wild-type | Placebo + cetuximab + irinotecan | 0  | 240       | 0           | Progressive Disease | 344      | 1          | No Death  | 0.46057     |
| 51  | M   | ASIAN        | 0    | RECTAL CANCER | Wild-type | Placebo + cetuximab + irinotecan | 0  | 77        | 0           | Progressive Disease | 412      | 1          | No Death  | 0.33283     |
| 49  | M   | WHITE        | 0    | COLON CANCER  | Wild-type | Placebo + cetuximab + irinotecan | 0  | 46        | 0           | Progressive Disease | 240      | 1          | No Death  | 0.40529     |
| 45  | M   | ASIAN        | 0    | RECTAL CANCER | Wild-type | Placebo + cetuximab + irinotecan | 0  | 208       | 0           | Progressive Disease | 344      | 1          | No Death  | 0.38804     |
| 76  | F   | ASIAN        | 1    | COLON CANCER  | Wild-type | Placebo + cetuximab + irinotecan | 0  | 126       | 0           | Progressive Disease | 204      | 0          | Death     | 0.28458     |
| 63  | M   | ASIAN        | 1    | RECTAL CANCER | Wild-type | Placebo + cetuximab + irinotecan | 0  | 120       | 0           | Progressive Disease | 325      | 0          | Death     | 0.46345     |
| 38  | F   | ASIAN        | 1    | RECTAL CANCER | Wild-type | Placebo + cetuximab + irinotecan | 0  | 83        | 0           | Progressive Disease | 265      | 0          | Death     | 0.53427     |
| 48  | F   | ASIAN        | 1    | COLON CANCER  | Wild-type | Placebo + cetuximab + irinotecan | 0  | 40        | 0           | Progressive Disease | 128      | 1          | No Death  | 0.41484     |
| 54  | M   | ASIAN        | 0    | COLON CANCER  | Wild-type | Placebo + cetuximab + irinotecan | 1  | 505       | 0           | Progressive Disease | 681      | 1          | No Death  | 0.50694     |
| 52  | F   | MULTI-RACIAL | 1    | COLON CANCER  | Wild-type | Placebo + cetuximab + irinotecan | 0  | 74        | 0           | Progressive Disease | 287      | 0          | Death     | 0.33111     |
| 78  | F   | WHITE        | 1    | RECTAL CANCER | Wild-type | Placebo + cetuximab + irinotecan | 0  | 35        | 0           | Progressive Disease | 230      | 1          | No Death  | 0.26912     |

|    |   |                           |   |               |           |                                  |   |     |   |                     |     |   |          |         |
|----|---|---------------------------|---|---------------|-----------|----------------------------------|---|-----|---|---------------------|-----|---|----------|---------|
| 67 | M | WHITE                     | 1 | COLON CANCER  | Wild-type | Placebo + cetuximab + irinotecan | 0 | 38  | 0 | Progressive Disease | 254 | 1 | No Death | 0.4478  |
| 75 | F | MULTI-RACIAL              | 1 | COLON CANCER  | Wild-type | Placebo + cetuximab + irinotecan | 0 | 166 | 0 | Progressive Disease | 308 | 1 | No Death | 0.33989 |
| 63 | M | WHITE                     | 1 | RECTAL CANCER | Wild-type | Placebo + cetuximab + irinotecan | 0 | 33  | 0 | Progressive Disease | 153 | 0 | Death    | 0.29138 |
| 45 | M | WHITE                     | 1 | COLON CANCER  | Wild-type | Placebo + cetuximab + irinotecan | 0 | 40  | 0 | Progressive Disease | 197 | 0 | Death    | 0.32712 |
| 32 | M | BLACK OR AFRICAN AMERICAN | 1 | COLON CANCER  | Wild-type | Placebo + cetuximab + irinotecan | 0 | 217 | 0 | Progressive Disease | 357 | 0 | Death    | 0.43165 |
| 58 | F | WHITE                     | 1 | COLON CANCER  | Wild-type | Placebo + cetuximab + irinotecan | 0 | 35  | 0 | Progressive Disease | 217 | 0 | Death    | 0.48034 |
| 60 | M | WHITE                     | 1 | COLON CANCER  | Wild-type | Placebo + cetuximab + irinotecan | 0 | 172 | 0 | Progressive Disease | 250 | 0 | Death    | 0.43034 |
| 67 | M | WHITE                     | 1 | RECTAL CANCER | Wild-type | Placebo + cetuximab + irinotecan | 0 | 119 | 0 | Progressive Disease | 320 | 0 | Death    | 0.34573 |
| 66 | M | ASIAN                     | 0 | COLON CANCER  | Wild-type | Placebo + cetuximab + irinotecan | 0 | 125 | 0 | Progressive Disease | 239 | 1 | No Death | 0.47834 |
| 66 | M | WHITE                     | 1 | COLON CANCER  | Wild-type | Placebo + cetuximab + irinotecan | 0 | 122 | 0 | Progressive Disease | 294 | 1 | No Death | 0.48044 |
| 64 | M | WHITE                     | 0 | RECTAL CANCER | Wild-type | Placebo + cetuximab + irinotecan | 1 | 178 | 0 | Progressive Disease | 374 | 1 | No Death | 0.58014 |
| 76 | F | WHITE                     | 0 | COLON CANCER  | Wild-type | Placebo + cetuximab + irinotecan | 0 | 83  | 0 | Progressive Disease | 275 | 0 | Death    | 0.20185 |

**Supplementary Table S2. Khambata-Ford et al. cetuximab-treated CRCs (n=80) (2)---cetuximab response (CR/PR/SD/PD), progression-free survival, KRAS mutation, and signature scores**

**Note:** The signature scores were calculated as described in Methods and merged with other clinical parameters adopted from “Online Table 1” (2). PFS---progression free survival; CR---complete response; PR---partial response; SD---stable disease; PD---progressed disease; UTD---undetermined..

| Affymetrix ID | Biopsy tissue | Best Clinical Response Assessment | Progression-free survival (PFS) # of days | KRAS Mutation | Cetuximab Sensitivity Score | 18-gene RAS pathway score | 64-gene Wnt pathway score | 24-gene Wnt pathway score | EREG (Log10) | AREG (log10) |
|---------------|---------------|-----------------------------------|-------------------------------------------|---------------|-----------------------------|---------------------------|---------------------------|---------------------------|--------------|--------------|
| 045_01_01     | Liver         | PD                                | 57                                        | WT            | 0.6308438                   | 3.295771                  | 3.1914747                 | 3.14019011                | 2.79379737   | 3.03539371   |
| 045_01_03     | Rectum        | PD                                | 67                                        | c.35G>T       | 0.3621764                   | 3.451521                  | 3.2203704                 | 3.20403575                | 2.00207963   | 3.06564319   |
| 045_01_04     | Liver         | PD                                | 56                                        | WT            | 0.6261061                   | 3.410118                  | 3.1936558                 | 3.11184874                | 1.85223594   | 2.21149431   |
| 045_01_05     | Liver         | PD                                | 59                                        | c.35G>T       | 0.6212725                   | 3.337681                  | 3.2866264                 | 3.15043067                | 2.89474239   | 3.36567514   |
| 045_01_07     | Liver         | SD                                | 121                                       | WT            | 0.4961696                   | 3.301994                  | 3.1762286                 | 3.14315135                | 3.04684231   | 3.41757465   |
| 045_01_08     | Lung          | UTD                               | 7                                         |               | 0.5357388                   | 3.346075                  | 3.0416523                 | 3.09849995                | 2.34470658   | 2.88085931   |
| 045_01_09     | Liver         | SD                                | 116                                       | na            | 0.5032093                   | 3.245328                  | 3.1047223                 | 3.03094373                | 2.80113605   | 3.14135883   |
| 045_01_10     | Liver         | PD                                | 57                                        | WT            | 0.4656079                   | 3.481764                  | 3.3025025                 | 3.18377399                | 2.81626782   | 3.40662363   |
| 045_01_11     | Abdomen       | PD                                | 61                                        | WT            | 0.2922783                   | 3.386407                  | 2.9874999                 | 3.16092417                | 2.9342004    | 3.00785442   |
| 045_02_01     | Liver         | PD                                | 56                                        | c.35G>T       | 0.5164958                   | 3.365319                  | 3.1320439                 | 3.1500936                 | 2.82532224   | 3.21135285   |
| 045_02_02     | Liver         | SD                                | 185                                       | WT            | 0.7199774                   | 3.324779                  | 3.1656779                 | 3.16705                   | 2.64551069   | 3.20702814   |
| 045_02_03     | Liver         | SD                                | 115                                       | WT            | 0.8015893                   | 3.185325                  | 3.3574188                 | 3.00898925                | 3.29674634   | 3.76568867   |
| 045_02_04     | Liver         | PD                                | 61                                        | WT            | 0.5514157                   | 3.155777                  | 3.1362644                 | 2.92696289                | 2.48791573   | 2.52053593   |
| 045_02_05     | Liver         | PD                                | 22                                        |               | 0.2641464                   | 3.370137                  | 2.8194828                 | 3.02615502                | 1.56181666   | 2.67364746   |
| 045_02_06     | Lung          | PD                                | 62                                        | c.35G>A       | 0.3470922                   | 3.36651                   | 3.140634                  | 3.1761966                 | 1.45818444   | 2.12060683   |
| 045_02_08     | Lung          | PR                                | 245                                       | WT            | 0.6421869                   | 3.266625                  | 3.0278171                 | 3.06575027                | 3.16061557   | 3.53085129   |
| 045_02_09     | Liver         | PD                                | 57                                        | WT            | 0.3321488                   | 3.387553                  | 2.8742899                 | 3.02032764                | 2.65345372   | 2.97763674   |
| 045_02_10     | Liver         | PD                                | 63                                        | c.35G>T       | 0.5479819                   | 3.419364                  | 3.2248256                 | 3.20688283                | 2.95714258   | 3.32924122   |
| 045_03_01     | Liver         | PD                                | 51                                        | c.35G>A       | 0.8064543                   | 3.352584                  | 3.214312                  | 3.0266162                 | 2.7242349    | 2.91021873   |
| 045_03_02     | Liver         | PD                                | 60                                        | c.35G>A       | 0.6046653                   | 3.37904                   | 3.0800974                 | 3.10996727                | 2.80212351   | 3.35628789   |
| 045_03_03     | Liver         | PD                                | 60                                        | WT            | 0.7672783                   | 3.344336                  | 3.3198718                 | 3.10193324                | 2.68681495   | 2.90384392   |
| 045_03_04     | Bone          | SD                                | 120                                       | c.35G>A       | 0.4394358                   | 3.357137                  | 3.1301928                 | 3.13304019                | 1.79906472   | 2.78502359   |
| 045_03_05     | Liver         | PD                                | 54                                        | na            | 0.6238737                   | 3.395293                  | 3.2711488                 | 3.15153951                | 2.76893394   | 3.27394758   |
| 045_03_06     | Colon         | PD                                | 70                                        | c.35G>A       | 0.6044965                   | 3.29304                   | 3.2571651                 | 3.06976475                | 2.74093085   | 2.85682552   |
| 045_03_08     | Liver         | SD                                | 123                                       | WT            | 0.6459192                   | 3.153931                  | 3.2947895                 | 2.99786965                | 3.12437705   | 3.64489825   |
| 045_03_09     | Liver         | SD                                | 50                                        | WT            | 0.2621615                   | 3.109921                  | 2.6429097                 | 2.77872665                | 1.95051089   | 2.02456776   |
| 045_03_10     | Liver         | UTD                               | 34                                        | c.35G>A       | 0.5093938                   | 3.360753                  | 3.1517305                 | 3.15246549                | 2.78051173   | 3.19908018   |
| 045_04_01     | Liver         | PD                                | 60                                        | WT            | 0.6514763                   | 3.214303                  | 2.9327508                 | 2.91344142                | 2.03273961   | 2.0489853    |
| 045_04_03     | Liver         | PD                                | 61                                        | WT            | 0.674892                    | 3.20719                   | 3.0063893                 | 2.97514542                | 2.84149712   | 3.2399873    |
| 045_04_04     | Liver         | UTD                               | 52                                        | WT            | 0.5741422                   | 3.356466                  | 3.1688816                 | 3.09398452                | 2.38210714   | 2.47908561   |
| 045_04_05     | Pancreas      | PD                                | 58                                        | c.35G>C       | 0.4343117                   | 3.409176                  | 3.1924013                 | 3.13715466                | 2.23355449   | 2.72636039   |
| 045_04_06     | Liver         | PR                                | 248                                       | WT            | 0.7369154                   | 3.385828                  | 3.2970586                 | 3.0959575                 | 3.0448963    | 3.59933495   |
| 045_04_07     | Liver         | SD                                | 159                                       | WT            | 0.7389217                   | 3.303479                  | 3.2849261                 | 3.13320065                | 3.14486986   | 3.40275302   |
| 045_04_09     | Liver         | SD                                | 156                                       | WT            | 0.6651334                   | 3.262224                  | 3.1910285                 | 3.10790254                | 2.90575811   | 3.44857648   |
| 045_04_10     | Liver         | PD                                | 59                                        | c.35G>T       | 0.4864789                   | 3.322414                  | 3.0965964                 | 3.07189718                | 2.35181563   | 2.6898148    |
| 045_05_01     | Liver         | UTD                               | 123                                       | c.38G>A       | 0.5143725                   | 3.312524                  | 3.0880836                 | 3.04133916                | 2.82282818   | 3.2192596    |
| 045_05_02     | Liver         | PD                                | 50                                        | WT            | 0.6429032                   | 3.318996                  | 3.1528058                 | 3.05409651                | 2.75865457   | 2.78663787   |
| 045_05_03     | Liver         | PD                                | 49                                        | WT            | 0.3518377                   | 3.213691                  | 3.0253516                 | 2.87351756                | 1.89602991   | 1.62355939   |

|           |                            |     |     |         |           |          |           |            |            |            |
|-----------|----------------------------|-----|-----|---------|-----------|----------|-----------|------------|------------|------------|
| 045_05_04 | Abdomen                    | PD  | 59  | c.35G>A | 0.280383  | 3.362337 | 3.0337656 | 3.03526045 | 1.8909796  | 2.64570712 |
| 045_05_05 | Liver                      | CR  | 308 |         | 0.6717122 | 3.265554 | 3.1657562 | 3.04875481 | 3.22008454 | 3.41056467 |
| 045_05_07 | Liver                      | PD  | 58  | c.34G>A | 0.3950595 | 3.246949 | 3.0462116 | 2.99599596 | 1.88456881 | 3.07279013 |
| 045_05_09 | Liver                      | PD  | 57  | WT      | 0.7116182 | 3.259722 | 3.2867719 | 3.07879945 | 2.47523522 | 3.16567455 |
| 045_05_10 | Liver                      | PD  | 59  | c.35G>A | 0.6301311 | 3.253701 | 3.253226  | 3.05528409 | 2.93958913 | 3.26905973 |
| 045_06_01 | Liver                      | PD  | 42  | WT      | 0.6022833 | 3.387102 | 3.1786319 | 3.20208532 | 2.58441039 | 3.01465492 |
| 045_06_02 | Liver                      | PR  | 165 | WT      | 0.5640866 | 3.223291 | 3.1131045 | 2.97867606 | 3.31025136 | 3.52273236 |
| 045_06_03 | Abdomen                    | PD  | 58  |         | 0.2129094 | 3.311748 | 3.0392212 | 3.02540366 | 1.62930764 | 2.3743817  |
| 045_06_05 | Liver                      | SD  | 120 | WT      | 0.7154486 | 3.235722 | 3.1603049 | 3.03420913 | 3.06254438 | 3.39466527 |
| 045_06_06 | Liver                      | PD  | 15  | WT      | 0.1717673 | 2.871212 | 2.5360124 | 2.59309046 | 0.91115761 | 1.5940609  |
| 045_06_07 | Adrenal gland; Kidney      | PR  | 197 | WT      | 0.621088  | 3.271639 | 3.1624457 | 3.03775312 | 3.06676559 | 3.70613036 |
| 045_06_08 | Liver                      | PD  | 57  | WT      | 0.1264623 | 2.791587 | 2.4460524 | 2.55042597 | 0.0211893  | 1.44263653 |
| 045_06_10 | Rectal                     | SD  | 147 | WT      | 0.6863162 | 3.259713 | 3.1529809 | 3.03671928 | 3.24672256 | 3.54862033 |
| 045_07_01 | Liver                      | PD  | 60  | WT      | 0.6542216 | 3.239838 | 3.2116574 | 3.16679669 | 3.05208959 | 3.21657492 |
| 045_07_02 | Abdomen (soft tissue mass) | PD  | 58  |         | 0.3436094 | 3.238336 | 2.7033689 | 2.97817657 | 1.66614343 | 2.08742646 |
| 045_07_03 | Liver                      | PD  | 59  | na      | 0.6015249 | 3.272282 | 3.3844805 | 3.05037107 | 2.31428866 | 2.70202535 |
| 045_07_04 | Liver                      | SD  | 45  | WT      | 0.6729239 | 3.224736 | 3.253089  | 3.10924309 | 2.46587339 | 2.9801125  |
| 045_07_06 | Cervical-Neck node         | SD  | 208 | WT      | 0.6120517 | 3.366985 | 3.2243935 | 3.12065342 | 2.90305198 | 3.17005039 |
| 045_07_08 | Liver                      | SD  | 180 | na      | 0.6815711 | 3.249404 | 3.2108327 | 3.12208782 | 3.34884982 | 3.7429748  |
| 045_07_10 | Liver                      | UTD | 56  | WT      | 0.1512897 | 3.055257 | 2.5672711 | 2.7282001  | 1.06032003 | 1.73343803 |
| 045_08_01 | Liver                      | PD  | 59  | c.35G>C | 0.504556  | 3.085112 | 2.8712721 | 2.86390413 | 2.84709739 | 3.19224398 |
| 045_08_02 | Abdomen                    | SD  | 199 | WT      | 0.7166929 | 3.285815 | 3.2705342 | 3.11278327 | 3.48840123 | 3.80552329 |
| 045_08_03 | Liver                      | PD  | 52  |         | 0.2630653 | 3.075687 | 2.7218902 | 2.84664894 | 1.70739983 | 1.87875152 |
| 045_08_04 | Scalp                      | UTD | 40  | c.35G>A | 0.5195852 | 3.433042 | 3.247068  | 3.22625098 | 1.75273969 | 2.50719449 |
| 045_08_07 | Liver                      | UTD | 42  | WT      | 0.3801196 | 3.346192 | 3.0142465 | 3.10509918 | 2.05361617 | 3.03602174 |
| 045_08_08 | Liver                      | PD  | 41  | c.35G>A | 0.6250567 | 3.387064 | 3.2115446 | 3.07713656 | 2.62249379 | 2.60479825 |
| 045_08_09 | Liver                      | PD  | 66  | WT      | 0.1648949 | 2.856181 | 2.4728141 | 2.57901124 | 1.13417711 | 1.09447113 |
| 045_08_10 | Liver                      | SD  | 253 | WT      | 0.5329852 | 3.195504 | 3.0997436 | 2.96822318 | 2.9137344  | 3.15127176 |
| 045_09_01 | Liver                      | UTD | 57  | c.35G>A | 0.4926925 | 3.214645 | 3.0511974 | 3.03660423 | 2.67187603 | 2.94087493 |
| 045_09_03 | Abdomen                    | PD  | 62  | c.35G>T | 0.6568569 | 3.378347 | 3.2409564 | 3.13190651 | 2.95322313 | 3.29769925 |
| 045_09_04 | Liver                      | UTD | 1   | WT      | 0.2077852 | 2.872962 | 2.4264969 | 2.5091055  | 1.18949031 | 1.3834563  |
| 045_09_05 | Liver                      | PD  | 24  | WT      | 0.4087922 | 3.332044 | 2.9800384 | 3.08547395 | 1.80949238 | 2.97160516 |
| 045_09_06 | Liver                      | PD  | 61  | c.38G>A | 0.6307846 | 3.387723 | 3.2943318 | 3.1518811  | 2.67095981 | 3.03967581 |
| 045_09_08 | Liver                      | PD  | 29  | c.35G>A | 0.329242  | 3.136697 | 2.8453104 | 2.86931626 | 2.11008442 | 2.25029799 |
| 045_10_01 | Liver                      | PD  | 58  | WT      | 0.744613  | 3.260537 | 3.1559417 | 3.05239882 | 2.66238002 | 2.95513913 |
| 045_10_02 | Liver                      | SD  | 122 | WT      | 0.6011891 | 3.21304  | 3.1033804 | 2.94814413 | 2.81036695 | 3.19161028 |
| 045_10_03 | Abdomen (possibly rectal)  | SD  | 183 | WT      | 0.1332605 | 2.991302 | 2.7157569 | 2.80850889 | 0.34242268 | 1.27600199 |
| 045_10_04 | Liver                      | SD  | 92  | c.35G>T | 0.7535501 | 3.221559 | 3.0554607 | 2.96412805 | 3.36862154 | 3.52555399 |
| 045_10_05 | Liver                      | PR  | 250 | WT      | 0.8325874 | 3.278112 | 3.2330528 | 3.0289824  | 3.38222423 | 3.15190587 |
| 045_10_06 | Liver                      | UTD | 391 | c.35G>A | 0.4088428 | 3.370011 | 3.187272  | 3.20166989 | 1.10890313 | 2.10704029 |
| 045_10_09 | Liver                      | UTD | 1   | c.38G>A | 0.4045979 | 3.134833 | 3.18676   | 3.03583915 | 2.38111508 | 3.2891406  |
| 045_10_10 | Rib                        | UTD | 59  | c.34G>A | 0.5664386 | 3.277043 | 2.9767584 | 3.10243214 | 2.41246055 | 2.93702615 |

## Supplementary Table S3

### A. Medico et al. CRC cell lines (n=147) (3)---MSI status, *KRAS*/*NRAS*/*BRAF* mutations, *in vitro* cetuximab effect (%), and signature scores

**Note:** The signature scores were calculated as described in Methods and merged with the molecular and pharmacological annotation of the cell lines adopted from “Supplementary Data 1” (3); mut RAS---mut *KRAS*/*NRAS* (1 — mut; 0 — wt).

| CRC Cell Line | MSI and RAS/RAF mutation |                 |                 |         |                         | <i>In vitro</i> Growth Inhibition (%) |               |               |               |                | Signature Scores (gene expression) |                           |                           |                           |              |              |
|---------------|--------------------------|-----------------|-----------------|---------|-------------------------|---------------------------------------|---------------|---------------|---------------|----------------|------------------------------------|---------------------------|---------------------------|---------------------------|--------------|--------------|
|               | MSI / MSS                | Mut <i>KRAS</i> | Mut <i>NRAS</i> | Mut RAS | Mut <i>BRAF</i> (V600E) | 1µg/ml Cetux                          | 10µg/ml Cetux | 25µg/ml Cetux | 50µg/ml Cetux | 100µg/ml Cetux | Cetuximab Sensitivity Score        | 18-gene RAS pathway score | 64-gene Wnt pathway score | 24-gene Wnt pathway score | EREG (Log10) | AREG (log10) |
| C10           | MSI                      | WT              | WT              | 0       | WT                      | -1.41                                 | -0.97         | 1.05          | 6.62          | -0.71          | 0.185                              | 2.988                     | 2.823                     | 3.278                     | 2.456        | 2.102        |
| C106          | MSS                      | p.G12C          | WT              | 1       | WT                      | 12.46                                 | 19.31         | 20.78         | 24.39         | 30.06          | 0.408                              | 3.059                     | 3.151                     | 3.109                     | 2.441        | 2.096        |
| C125PM        | MSS                      | p.K117N         | WT              | 1       | WT                      | 9.18                                  | 17.15         | 0.28          | 4.83          | 6.65           | 0.284                              | 3.102                     | 3.264                     | 3.095                     | 2.500        | 2.100        |
| C146          | MSI                      | p.G13D          | WT              | 1       | WT                      | -1.41                                 | 1.75          | 2.13          | 3.85          | 3.32           | 0.276                              | 3.007                     | 3.114                     | 3.283                     | 2.808        | 2.069        |
| C170          | MSI                      | p.G13D          | WT              | 1       | WT                      | 3.40                                  | -1.09         | 3.35          | 5.29          | 6.90           | 0.227                              | 3.013                     | 3.066                     | 3.229                     | 2.615        | 2.138        |
| C32           | MSS                      | WT              | p.G12D          | 1       | WT                      | -3.28                                 | -2.73         | -4.12         | 7.41          | 1.50           | 0.403                              | 3.077                     | 3.160                     | 3.091                     | 2.898        | 2.074        |
| C70           | MSS                      | WT              | WT              | 0       | WT                      | 44.51                                 | 52.09         | 60.04         | 67.78         | 66.81          | 0.429                              | 3.055                     | 3.229                     | 3.073                     | 2.626        | 2.083        |
| C75           | MSS                      | WT              | WT              | 0       | WT                      | 66.86                                 | 78.34         | 77.90         | 77.63         | 74.94          | 0.410                              | 2.877                     | 3.128                     | 3.005                     | 2.481        | 2.178        |
| C80           | MSS                      | p.A146V         | WT              | 1       | WT                      | 2.01                                  | 6.20          | 4.44          | 15.03         | 24.44          | 0.386                              | 2.913                     | 3.197                     | 3.107                     | 2.485        | 2.107        |
| C84           | MSS                      | p.G12A          | WT              | 1       | WT                      | 23.47                                 | 27.20         | 37.18         | 36.78         | 33.64          | 0.334                              | 3.005                     | 3.091                     | 3.123                     | 2.431        | 2.153        |
| C99           | MSS                      | WT              | WT              | 0       | WT                      | 59.43                                 | 68.08         | 72.40         | 76.18         | 78.64          | 0.336                              | 2.926                     | 3.174                     | 3.108                     | 2.507        | 2.087        |
| CACO2         | MSS                      | WT              | WT              | 0       | WT                      | 13.94                                 | 15.20         | 11.60         | 15.94         | 14.05          | 0.389                              | 2.950                     | 2.974                     | 2.884                     | 2.449        | 2.074        |
| CAR1          | MSS                      | WT              | WT              | 0       | WT                      | 10.52                                 | 15.53         | 22.83         | 24.39         | 29.19          | 0.242                              | 2.980                     | 2.783                     | 3.037                     | 2.315        | 2.112        |
| CCK81         | MSI                      | WT              | WT              | 0       | WT                      | 67.99                                 | 73.21         | 73.29         | 77.69         | 80.15          | 0.321                              | 2.902                     | 3.128                     | 2.945                     | 2.623        | 2.074        |
| CL11          | MSS                      | p.Q61H          | WT              | 1       | WT                      | 2.18                                  | 4.67          | 5.59          | 6.00          | 4.89           | 0.239                              | 3.154                     | 3.109                     | 3.287                     | 2.468        | 2.149        |
| CL14          | MSS                      | WT              | WT              | 0       | WT                      | 40.43                                 | 47.75         | 48.51         | 55.50         | 55.72          | 0.368                              | 3.165                     | 3.210                     | 3.082                     | 2.860        | 2.153        |
| CL34          | MSI                      | WT              | WT              | 0       | p.V600E                 | 7.86                                  | 7.56          | 7.20          | 12.61         | 11.49          | 0.224                              | 3.000                     | 3.153                     | 3.188                     | 2.528        | 2.080        |
| CL40          | MSI                      | p.G12D          | WT              | 1       | WT                      | 4.63                                  | 16.40         | 17.32         | 24.01         | 30.39          | 0.248                              | 3.106                     | 3.240                     | 3.259                     | 2.377        | 2.104        |
| COCM1         | MSS                      | WT              | WT              | 0       | WT                      | 58.39                                 | 70.60         | 74.39         | 78.79         | 84.87          | 0.525                              | 2.997                     | 3.178                     | 3.046                     | 2.604        | 2.138        |
| COGA1         | MSI                      | WT              | WT              | 0       | WT                      | 53.44                                 | 59.94         | 67.64         | 66.21         | 68.21          | 0.161                              | 3.024                     | 3.132                     | 3.143                     | 2.678        | 2.167        |
| COGA12        | MSI                      | WT              | WT              | 0       | WT                      | 39.15                                 | 46.98         | 53.12         | 55.49         | 60.62          | 0.309                              | 2.840                     | 3.096                     | 3.009                     | 2.363        | 2.109        |
| COGA2         | MSS                      | p.G12S          | WT              | 1       | WT                      | 24.15                                 | 28.59         | 33.95         | 37.75         | 46.69          | 0.275                              | 3.080                     | 3.339                     | 3.186                     | 2.329        | 1.978        |
| COGA3         | MSI                      | p.G13D          | WT              | 1       | WT                      | -1.02                                 | -2.69         | 0.21          | 4.79          | 3.70           | 0.283                              | 2.980                     | 3.131                     | 2.983                     | 2.536        | 2.043        |
| COGA5         | MSS                      | p.G13D          | WT              | 1       | WT                      | 2.29                                  | -5.62         | -1.58         | 9.13          | 0.90           | 0.344                              | 3.030                     | 2.962                     | 3.218                     | 2.647        | 2.121        |
| COGA5L        | MSS                      | p.G13D          | WT              | 1       | WT                      | -2.05                                 | -2.75         | 1.24          | 2.14          | 1.59           | 0.341                              | 3.055                     | 3.204                     | 3.231                     | 2.290        | 2.048        |
| COGA8         | MSS                      | WT              | WT              | 0       | WT                      | -2.73                                 | -1.19         | -0.01         | 5.60          | 20.61          | 0.304                              | 3.055                     | 3.162                     | 3.106                     | 2.828        | 2.084        |
| COLO201       | MSS                      | WT              | WT              | 0       | p.V600E                 | 2.40                                  | 1.45          | 2.37          | 6.04          | 3.38           | 0.419                              | 3.061                     | 3.062                     | 3.290                     | 3.116        | 2.122        |
| COLO205       | MSS                      | WT              | WT              | 0       | p.V600E                 | 6.59                                  | 6.03          | 3.82          | 12.52         | 13.49          | 0.348                              | 2.942                     | 3.040                     | 3.236                     | 2.385        | 2.093        |
| COLO320       | MSS                      | WT              | WT              | 0       | WT                      | -1.27                                 | 2.04          | -1.41         | 0.34          | 1.56           | 0.203                              | 2.747                     | 2.789                     | 2.563                     | 2.236        | 2.101        |
| COLO320DM     | MSS                      | WT              | WT              | 0       | WT                      | -9.16                                 | -8.77         | -4.25         | -3.23         | -5.58          | 0.208                              | 2.809                     | 2.841                     | 2.536                     | 2.232        | 2.106        |
| COLO320HSR    | MSS                      | WT              | WT              | 0       | WT                      | -2.33                                 | -2.90         | -1.04         | 6.72          | 9.21           | 0.215                              | 2.787                     | 2.814                     | 2.650                     | 2.273        | 2.071        |
| COLO60H       | MSI                      | p.A146T         | WT              | 1       | WT                      | -0.40                                 | -2.30         | -1.90         | -0.68         | 0.95           | 0.276                              | 3.024                     | 3.265                     | 3.215                     | 2.377        | 2.186        |

|         |     |         |    |   |         |        |       |       |        |       |       |       |       |       |       |       |
|---------|-----|---------|----|---|---------|--------|-------|-------|--------|-------|-------|-------|-------|-------|-------|-------|
| COLO678 | MSS | p.G12D  | WT | 1 | WT      | -1.66  | 6.69  | -3.44 | -5.15  | -3.69 | 0.294 | 2.864 | 2.856 | 3.115 | 2.312 | 2.050 |
| COLO94H | MSS | p.G12D  | WT | 1 | WT      | 2.43   | 1.69  | 4.05  | 5.71   | 3.95  | 0.383 | 2.981 | 3.288 | 3.221 | 2.332 | 2.122 |
| CX1     | MSS | WT      | WT | 0 | p.V600E | -1.64  | 1.63  | 4.91  | 7.89   | 16.46 | 0.210 | 2.974 | 2.995 | 3.135 | 2.575 | 2.129 |
| DIFI    | MSS | WT      | WT | 0 | WT      | 78.26  | 80.82 | 81.32 | 80.82  | 80.33 | 0.402 | 3.091 | 3.224 | 3.062 | 2.331 | 2.127 |
| DLD1    | MSI | p.G13D  | WT | 1 | WT      | 0.36   | -2.43 | 0.65  | 1.34   | -0.25 | 0.309 | 2.978 | 3.068 | 3.171 | 3.038 | 2.134 |
| FET     | MSS | p.G12D  | WT | 1 | WT      | 2.21   | 2.92  | 4.26  | 8.76   | 6.44  | 0.315 | 3.027 | 3.077 | 3.149 | 2.591 | 2.116 |
| Gp5D    | MSI | p.G12D  | WT | 1 | WT      | 26.25  | 29.89 | 31.03 | 34.64  | 40.35 | 0.303 | 2.919 | 3.076 | 3.079 | 2.298 | 2.091 |
| HCA24   | MSS | WT      | WT | 0 | WT      | 19.46  | 24.27 | 27.63 | 28.52  | 33.03 | 0.339 | 2.964 | 3.244 | 3.136 | 2.709 | 2.064 |
| HCA46   | MSS | WT      | WT | 0 | WT      | 48.26  | 60.06 | 74.20 | 78.20  | 78.51 | 0.423 | 3.008 | 3.248 | 3.107 | 2.375 | 2.106 |
| HCA7    | MSI | WT      | WT | 0 | WT      | 30.46  | 43.52 | 46.98 | 45.85  | 55.85 | 0.185 | 2.968 | 2.818 | 3.136 | 2.239 | 2.131 |
| HCC2998 | MSS | p.A146T | WT | 1 | WT      | -1.20  | 2.07  | 0.48  | 5.55   | 5.14  | 0.283 | 2.978 | 3.113 | 3.026 | 2.477 | 2.119 |
| HCT116  | MSI | p.G13D  | WT | 1 | WT      | 9.09   | 8.75  | 6.93  | 7.40   | 10.16 | 0.218 | 2.829 | 2.704 | 3.134 | 2.385 | 2.100 |
| HCT15   | MSI | p.G13D  | WT | 1 | WT      | -0.79  | 0.25  | 0.70  | -3.88  | -2.20 | 0.263 | 2.880 | 2.973 | 3.038 | 2.448 | 2.086 |
| HCT8    | MSI | p.G13D  | WT | 1 | WT      | -6.03  | 8.74  | -2.35 | 8.38   | 10.64 | 0.284 | 2.900 | 2.896 | 3.015 | 2.338 | 2.118 |
| HDC114  | MSS | WT      | WT | 0 | WT      | 21.71  | 23.35 | 25.44 | 25.38  | 28.71 | 0.241 | 3.106 | 3.145 | 3.065 | 2.683 | 2.152 |
| HDC135  | MSI | WT      | WT | 0 | p.V600E | 3.93   | 5.90  | 8.65  | 9.44   | 4.73  | 0.228 | 3.028 | 3.096 | 3.228 | 2.861 | 2.116 |
| HDC142  | MSS | WT      | WT | 0 | WT      | 47.06  | 57.97 | 57.17 | 59.84  | 66.77 | 0.357 | 3.151 | 3.221 | 3.059 | 2.574 | 2.165 |
| HDC143  | MSI | WT      | WT | 0 | WT      | 3.67   | -2.94 | -3.79 | -1.53  | 2.92  | 0.240 | 2.973 | 3.142 | 3.014 | 2.426 | 2.170 |
| HDC54   | MSS | WT      | WT | 0 | WT      | 31.80  | 37.72 | 35.53 | 35.71  | 45.55 | 0.319 | 2.869 | 3.174 | 2.893 | 2.426 | 2.150 |
| HDC8    | MSS | p.G12D  | WT | 1 | WT      | 0.40   | 1.06  | 0.75  | 5.61   | 8.82  | 0.262 | 3.034 | 2.871 | 3.140 | 2.633 | 2.116 |
| HDC82   | MSS | WT      | WT | 0 | WT      | 56.07  | 63.37 | 71.55 | 71.34  | 71.69 | 0.391 | 2.980 | 3.172 | 3.026 | 2.602 | 2.096 |
| HDC9    | MSI | WT      | WT | 0 | WT      | 6.25   | 8.48  | 6.91  | 12.34  | 5.91  | 0.147 | 2.974 | 3.128 | 3.066 | 2.289 | 2.172 |
| HRA16   | MSS | WT      | WT | 0 | WT      | 58.48  | 61.22 | 60.77 | 63.53  | 60.11 | 0.461 | 3.136 | 3.279 | 3.101 | 2.529 | 2.100 |
| HROC18  | MSS | p.A146V | WT | 1 | WT      | 6.20   | 8.74  | 0.90  | 24.82  | 19.99 | 0.352 | 3.226 | 3.297 | 3.142 | 2.876 | 2.109 |
| HROC24  | MSI | WT      | WT | 0 | p.V600E | 1.51   | 2.41  | 7.05  | 2.89   | 0.29  | 0.189 | 3.014 | 3.190 | 3.270 | 2.494 | 2.141 |
| HROC32  | MSS | p.G12A  | WT | 1 | WT      | 20.26  | 21.87 | 24.55 | 40.69  | 37.10 | 0.461 | 3.067 | 3.228 | 3.156 | 2.726 | 2.076 |
| HROC39  | MSS | p.A146T | WT | 1 | WT      | 17.42  | 10.53 | 15.73 | 19.85  | 14.50 | 0.402 | 3.108 | 3.273 | 3.147 | 2.498 | 2.143 |
| HROC46  | MSS | p.G12V  | WT | 1 | WT      | 13.69  | 4.71  | 12.81 | 9.58   | -3.27 | 0.404 | 3.135 | 3.277 | 3.154 | 2.714 | 2.141 |
| HROC69  | MSS | WT      | WT | 0 | WT      | 16.15  | 14.76 | 17.76 | 17.66  | 22.07 | 0.343 | 2.892 | 2.879 | 2.901 | 2.313 | 2.100 |
| HROC80  | MSS | p.G12V  | WT | 1 | WT      | -7.38  | -6.47 | -3.96 | -7.83  | 13.39 | 0.325 | 3.143 | 3.194 | 3.155 | 2.828 | 2.065 |
| HROC87  | MSI | WT      | WT | 0 | p.V600E | 7.15   | 8.78  | 6.31  | 10.26  | 12.89 | 0.196 | 3.018 | 3.034 | 3.222 | 2.709 | 2.095 |
| HT115   | MSS | WT      | WT | 0 | WT      | 13.60  | 21.04 | 25.20 | 30.73  | 45.06 | 0.246 | 3.121 | 3.205 | 3.066 | 2.651 | 2.126 |
| HT29    | MSS | WT      | WT | 0 | p.V600E | -0.76  | -2.13 | 0.83  | 8.72   | 8.47  | 0.297 | 2.906 | 2.900 | 3.104 | 2.499 | 2.119 |
| HT55    | MSS | WT      | WT | 0 | WT      | 12.38  | 17.77 | 16.83 | 23.44  | 22.03 | 0.477 | 2.991 | 3.217 | 3.106 | 2.370 | 2.089 |
| HUTU80  | MSS | WT      | WT | 0 | WT      | -2.56  | -4.30 | -4.68 | -5.35  | -2.10 | 0.207 | 2.790 | 2.791 | 2.807 | 2.358 | 2.161 |
| KM12    | MSI | WT      | WT | 0 | WT      | -4.36  | -4.80 | -4.90 | -4.05  | -2.64 | 0.193 | 2.904 | 2.980 | 3.253 | 2.668 | 2.022 |
| KM12C   | MSI | WT      | WT | 0 | WT      | -5.25  | -4.72 | -5.11 | 0.42   | 2.48  | 0.182 | 2.936 | 2.981 | 3.243 | 2.385 | 2.159 |
| KM12L4  | MSI | WT      | WT | 0 | WT      | -3.13  | -0.41 | -3.48 | 0.16   | 4.92  | 0.189 | 2.887 | 2.915 | 3.264 | 2.519 | 2.151 |
| KM12SM  | MSI | WT      | WT | 0 | WT      | -9.63  | -7.66 | -6.60 | -2.08  | 7.77  | 0.195 | 2.926 | 2.952 | 3.296 | 2.674 | 2.176 |
| KM20    | MSS | WT      | WT | 0 | p.V600E | -10.24 | -9.51 | 14.25 | -13.25 | -5.98 | 0.300 | 2.937 | 3.014 | 3.120 | 2.525 | 2.122 |
| LIM1215 | MSI | WT      | WT | 0 | WT      | 59.05  | 61.42 | 60.12 | 59.67  | 60.42 | 0.290 | 3.097 | 3.201 | 3.045 | 2.709 | 2.127 |
| LIM1899 | MSI | p.G12A  | WT | 1 | WT      | 0.47   | 1.17  | 7.36  | 7.25   | 12.86 | 0.257 | 3.059 | 3.312 | 3.188 | 2.372 | 2.151 |
| LIM2099 | MSS | p.G12C  | WT | 1 | WT      | 3.01   | 13.04 | 4.45  | 4.74   | 6.98  | 0.200 | 3.005 | 2.817 | 3.196 | 2.908 | 2.181 |
| LIM2405 | MSI | WT      | WT | 0 | p.V600E | 5.01   | -0.03 | 1.18  | 2.70   | 1.25  | 0.316 | 2.804 | 2.643 | 3.278 | 2.609 | 2.066 |
| LIM2412 | MSI | WT      | WT | 0 | p.V600E | 3.12   | -0.73 | -3.69 | -1.19  | -3.22 | 0.356 | 2.929 | 2.811 | 3.345 | 2.600 | 2.155 |



|         |     |         |    |   |         |        |        |       |        |       |       |       |       |       |       |       |
|---------|-----|---------|----|---|---------|--------|--------|-------|--------|-------|-------|-------|-------|-------|-------|-------|
| LIM2537 | MSI | WT      | WT | 0 | p.V600E | -10.99 | -8.65  | 11.34 | -6.00  | 4.91  | 0.295 | 2.946 | 2.927 | 3.276 | 3.399 | 2.082 |
| LIM2550 | MSI | p.Q61K  | WT | 1 | WT      | 10.05  | 14.77  | 11.95 | 5.43   | 5.95  | 0.266 | 2.978 | 2.950 | 3.088 | 2.988 | 2.098 |
| LIM2551 | MSI | WT      | WT | 0 | p.V600E | 0.45   | -2.97  | -0.88 | -1.37  | 5.26  | 0.184 | 3.059 | 3.166 | 3.199 | 2.590 | 2.075 |
| LOVO    | MSI | p.G13D  | WT | 1 | WT      | -2.45  | 1.56   | 6.62  | 14.27  | 11.55 | 0.170 | 3.014 | 3.020 | 3.167 | 2.718 | 2.180 |
| LS1034  | MSS | p.A146T | WT | 1 | WT      | 1.88   | 2.17   | 3.70  | 0.98   | 5.22  | 0.383 | 3.003 | 3.243 | 3.117 | 2.690 | 2.119 |
| LS123   | MSS | p.G12S  | WT | 1 | WT      | -4.66  | -7.76  | -5.77 | -4.80  | -4.74 | 0.302 | 3.099 | 2.984 | 3.272 | 2.311 | 2.132 |
| LS174T  | MSI | p.G12D  | WT | 1 | WT      | 7.94   | 7.77   | 8.93  | 9.72   | 6.18  | 0.167 | 2.957 | 3.159 | 3.208 | 2.454 | 2.132 |
| LS180   | MSI | p.G12D  | WT | 1 | WT      | 0.20   | -10.51 | -5.57 | -4.68  | -0.90 | 0.181 | 2.983 | 3.172 | 3.204 | 2.551 | 2.068 |
| LS411N  | MSI | WT      | WT | 0 | p.V600E | -4.00  | -2.32  | -4.96 | -6.12  | -3.59 | 0.239 | 2.922 | 3.051 | 3.213 | 2.332 | 2.107 |
| LS513   | MSS | p.G12D  | WT | 1 | WT      | 4.57   | 6.39   | 7.28  | 8.41   | 10.37 | 0.200 | 3.071 | 3.303 | 3.191 | 2.437 | 2.111 |
| MDST8   | MSS | WT      | WT | 0 | p.V600K | -6.12  | -4.81  | 4.91  | 7.89   | 16.46 | 0.125 | 2.925 | 2.745 | 3.053 | 2.546 | 2.108 |
| MIP101  | MSI | p.G13D  | WT | 1 | WT      | -0.64  | -0.33  | 2.04  | 2.38   | 2.27  | 0.236 | 2.922 | 3.091 | 3.107 | 2.424 | 2.120 |
| NCIH498 | MSS | p.Q61K  | WT | 1 | WT      | -0.54  | -2.01  | 0.48  | -4.65  | -2.56 | 0.364 | 3.004 | 3.169 | 3.200 | 3.009 | 2.192 |
| NCIH508 | MSS | WT      | WT | 0 | WT      | 80.64  | 85.36  | 82.92 | 83.42  | 84.31 | 0.366 | 2.920 | 3.076 | 3.096 | 2.338 | 2.107 |
| NCIH630 | MSI | WT      | WT | 0 | WT      | 2.43   | 4.87   | 4.68  | 4.97   | 7.01  | 0.426 | 2.996 | 3.168 | 3.029 | 2.591 | 2.162 |
| NCIH684 | MSS | p.G12D  | WT | 1 | WT      | 7.65   | 10.15  | 15.84 | 17.88  | 20.40 | 0.327 | 3.115 | 3.172 | 3.119 | 2.634 | 2.046 |
| NCIH716 | MSS | WT      | WT | 0 | WT      | -7.77  | 0.44   | -7.13 | 9.69   | 15.72 | 0.121 | 2.809 | 2.726 | 2.995 | 2.321 | 2.090 |
| NCIH747 | MSI | p.G13D  | WT | 1 | WT      | -9.20  | -13.02 | 12.32 | -1.20  | 8.11  | 0.323 | 2.968 | 2.819 | 3.175 | 2.440 | 2.115 |
| OUMS23  | MSS | WT      | WT | 0 | p.V600E | 1.07   | -3.04  | 0.88  | 13.81  | 6.49  | 0.269 | 2.969 | 2.926 | 3.084 | 2.310 | 2.102 |
| OXCO1   | MSS | WT      | WT | 0 | p.V600E | -6.98  | -6.16  | -3.71 | -0.44  | 16.06 | 0.260 | 3.048 | 2.898 | 3.307 | 3.134 | 2.143 |
| OXCO2   | MSI | WT      | WT | 0 | WT      | 79.30  | 83.85  | 88.16 | 86.17  | 89.89 | 0.375 | 3.035 | 3.278 | 3.124 | 2.740 | 2.067 |
| OXCO3   | MSS | p.Q61H  | WT | 1 | WT      | 4.54   | 8.96   | 5.30  | 2.01   | 9.76  | 0.404 | 3.106 | 3.084 | 3.081 | 3.227 | 2.093 |
| RCM1    | MSS | p.G12V  | WT | 1 | WT      | 6.01   | 10.58  | 12.99 | 16.51  | 21.62 | 0.400 | 3.087 | 3.245 | 3.169 | 2.644 | 2.160 |
| RKO     | MSI | WT      | WT | 0 | p.V600E | 8.36   | 6.16   | 3.31  | 0.36   | -2.68 | 0.213 | 2.726 | 2.658 | 3.081 | 2.350 | 2.097 |
| RW7213  | MSS | p.G12C  | WT | 1 | WT      | 11.64  | 13.50  | 14.73 | 15.81  | 14.34 | 0.344 | 3.022 | 3.286 | 3.290 | 2.350 | 2.100 |
| SKCO1   | MSS | p.G12V  | WT | 1 | WT      | -7.41  | -6.52  | -7.74 | -7.30  | 2.51  | 0.204 | 3.138 | 3.202 | 3.262 | 2.297 | 2.153 |
| SNU1033 | MSS | p.G12D  | WT | 1 | WT      | 2.06   | 4.51   | 3.03  | 1.21   | 5.55  | 0.322 | 3.160 | 3.188 | 3.184 | 2.552 | 2.145 |
| SNU1040 | MSI | WT      | WT | 0 | WT      | 22.59  | 27.56  | 21.95 | 33.65  | 32.57 | 0.216 | 2.962 | 3.097 | 3.022 | 2.476 | 2.124 |
| SNU1047 | MSI | WT      | WT | 0 | WT      | -7.13  | -8.55  | -8.17 | -6.48  | -6.25 | 0.335 | 3.097 | 3.283 | 3.252 | 2.274 | 2.200 |
| SNU1181 | MSS | p.G12S  | WT | 1 | WT      | 8.30   | 11.50  | 7.23  | 19.44  | 14.39 | 0.459 | 3.142 | 3.134 | 3.173 | 2.688 | 2.166 |
| SNU1235 | MSS | WT      | WT | 0 | p.V600E | 0.50   | 9.24   | -5.64 | -11.81 | 18.04 | 0.196 | 3.038 | 3.015 | 3.213 | 2.648 | 2.109 |
| SNU1411 | MSS | p.G12C  | WT | 1 | WT      | -4.55  | -2.16  | 0.28  | 4.83   | 6.65  | 0.329 | 3.028 | 2.995 | 3.190 | 2.526 | 2.048 |
| SNU1460 | MSS | WT      | WT | 0 | WT      | 48.33  | 53.98  | 58.27 | 57.70  | 67.51 | 0.408 | 3.053 | 3.166 | 3.031 | 2.553 | 2.085 |
| SNU1544 | MSI | WT      | WT | 0 | WT      | 0.04   | 2.48   | 7.12  | 13.29  | 18.10 | 0.236 | 3.054 | 3.110 | 3.207 | 2.556 | 2.124 |
| SNU1684 | MSI | p.G13D  | WT | 1 | WT      | 31.19  | 32.95  | 29.42 | 37.77  | 38.14 | 0.291 | 3.022 | 3.169 | 3.169 | 2.933 | 2.113 |
| SNU1746 | MSI | p.G13D  | WT | 1 | WT      | 0.42   | -18.35 | 18.02 | -8.84  | 13.65 | 0.131 | 2.967 | 3.170 | 3.088 | 2.267 | 2.139 |
| SNU175  | MSI | WT      | WT | 0 | WT      | 20.70  | 22.47  | 24.77 | 25.53  | 28.18 | 0.104 | 2.841 | 2.913 | 2.940 | 2.274 | 2.141 |
| SNU254  | MSS | p.G12D  | WT | 1 | WT      | -1.91  | 2.18   | -0.66 | 8.25   | 12.10 | 0.242 | 3.100 | 2.984 | 3.123 | 2.960 | 2.148 |
| SNU283  | MSS | WT      | WT | 0 | WT      | 44.43  | 44.14  | 48.30 | 51.53  | 54.37 | 0.413 | 2.940 | 3.167 | 2.988 | 2.659 | 2.074 |
| SNU407  | MSI | p.G12D  | WT | 1 | WT      | 14.23  | 15.01  | 20.15 | 20.97  | 24.13 | 0.176 | 3.009 | 3.074 | 3.051 | 2.350 | 2.139 |
| SNU479  | MSS | WT      | WT | 0 | WT      | 39.19  | 49.04  | 37.70 | 53.56  | 40.90 | 0.451 | 2.999 | 3.260 | 2.978 | 2.409 | 2.171 |
| SNU503  | MSS | WT      | WT | 0 | WT      | 37.89  | 43.18  | 46.83 | 54.14  | 51.75 | 0.272 | 2.928 | 2.710 | 2.977 | 2.325 | 2.167 |
| SNU61   | MSS | p.G12D  | WT | 1 | WT      | 5.64   | 3.17   | 5.59  | 11.37  | 12.80 | 0.281 | 3.039 | 3.113 | 3.109 | 2.268 | 2.073 |
| SNU769B | MSI | WT      | WT | 0 | WT      | 4.06   | 33.93  | 55.25 | 58.14  | 58.52 | 0.215 | 2.889 | 3.071 | 2.862 | 2.419 | 2.166 |
| SNU81   | MSS | p.A146T | WT | 1 | WT      | -2.86  | -1.10  | -1.19 | 6.26   | 3.11  | 0.216 | 3.051 | 3.092 | 3.132 | 2.399 | 2.104 |

|         |     |         |    |   |         |       |        |       |        |       |       |       |       |       |       |       |
|---------|-----|---------|----|---|---------|-------|--------|-------|--------|-------|-------|-------|-------|-------|-------|-------|
| SNU977  | MSS | WT      | WT | 0 | WT      | 2.09  | 4.32   | 6.72  | 19.90  | 15.63 | 0.337 | 3.031 | 2.954 | 2.891 | 2.339 | 2.177 |
| SNUC1   | MSS | WT      | WT | 0 | WT      | 5.36  | 5.73   | 3.37  | 8.68   | 11.71 | 0.424 | 3.102 | 3.272 | 3.105 | 2.606 | 2.088 |
| SNUC2A  | MSI | p.G12D  | WT | 1 | WT      | 1.16  | 3.41   | 1.31  | -2.73  | -7.28 | 0.155 | 2.884 | 2.738 | 3.072 | 2.293 | 2.165 |
| SNUC2B  | MSI | p.G12D  | WT | 1 | WT      | 4.65  | 11.92  | 13.14 | 16.61  | 18.35 | 0.142 | 2.975 | 2.994 | 3.073 | 2.288 | 2.107 |
| SNUC4   | MSI | WT      | WT | 0 | WT      | 33.14 | 35.35  | 44.69 | 48.32  | 47.80 | 0.187 | 2.967 | 3.117 | 3.115 | 2.382 | 2.238 |
| SNUC5   | MSI | WT      | WT | 0 | p.V600E | -0.83 | -0.73  | -3.68 | 4.94   | 4.72  | 0.258 | 2.846 | 2.729 | 3.247 | 2.756 | 2.150 |
| SW1116  | MSS | p.G12A  | WT | 1 | WT      | -3.47 | -2.57  | -1.16 | 2.00   | 2.42  | 0.453 | 3.122 | 3.306 | 3.084 | 2.694 | 2.063 |
| SW1222  | MSS | p.A146V | WT | 1 | WT      | 5.25  | 5.34   | 6.47  | 7.09   | 6.11  | 0.340 | 2.986 | 3.225 | 2.996 | 2.320 | 2.125 |
| SW1417  | MSS | WT      | WT | 0 | p.V600E | -0.58 | -1.27  | -1.94 | 8.32   | 8.71  | 0.409 | 3.217 | 3.252 | 3.206 | 2.569 | 2.165 |
| SW1463  | MSS | p.G12C  | WT | 1 | WT      | 1.68  | 11.23  | -0.38 | 13.19  | 13.18 | 0.438 | 2.968 | 3.319 | 3.061 | 2.681 | 2.115 |
| SW403   | MSS | p.G12V  | WT | 1 | WT      | 7.69  | 11.45  | 17.40 | 18.75  | 27.30 | 0.450 | 2.976 | 3.286 | 3.175 | 2.697 | 2.106 |
| SW48    | MSI | WT      | WT | 0 | WT      | 0.50  | 6.23   | 7.12  | 5.32   | 6.66  | 0.174 | 3.012 | 3.036 | 3.123 | 2.372 | 2.139 |
| SW480   | MSS | p.G12V  | WT | 1 | WT      | 3.80  | 1.70   | 5.60  | 3.42   | 8.18  | 0.302 | 3.018 | 3.036 | 3.149 | 2.286 | 2.143 |
| SW620   | MSS | p.G12V  | WT | 1 | WT      | -8.96 | -9.77  | -9.12 | -0.25  | 2.88  | 0.305 | 2.994 | 3.123 | 3.166 | 2.319 | 2.143 |
| SW837   | MSS | p.G12C  | WT | 1 | WT      | 8.45  | 10.55  | 11.82 | 7.90   | 9.43  | 0.268 | 3.032 | 2.967 | 3.030 | 2.488 | 2.164 |
| SW948   | MSS | p.Q61L  | WT | 1 | WT      | 1.08  | 0.06   | -0.92 | 0.07   | 1.38  | 0.330 | 2.974 | 3.219 | 3.126 | 2.502 | 2.117 |
| T84     | MSS | p.G13D  | WT | 1 | WT      | 5.29  | 5.14   | 6.96  | 15.59  | 10.60 | 0.358 | 3.095 | 3.199 | 3.154 | 2.563 | 2.109 |
| V411    | MSS | p.G13D  | WT | 1 | WT      | -1.90 | 2.74   | 2.84  | 4.46   | 4.68  | 0.260 | 2.975 | 3.072 | 3.021 | 2.342 | 2.069 |
| V457    | MSI | p.G12D  | WT | 1 | WT      | 2.24  | -0.29  | -4.57 | -0.38  | -3.12 | 0.224 | 3.008 | 3.121 | 3.146 | 2.546 | 2.121 |
| V481    | MSI | p.G12C  | WT | 1 | WT      | -8.04 | -10.72 | 10.22 | -13.27 | 17.06 | 0.208 | 2.947 | 3.148 | 3.196 | 2.582 | 2.133 |
| V703    | MSI | p.G12D  | WT | 1 | WT      | 6.51  | 7.85   | 9.04  | 11.93  | 13.41 | 0.299 | 2.979 | 3.175 | 3.155 | 2.497 | 2.162 |
| VACO432 | MSI | WT      | WT | 0 | p.V600E | 8.55  | 15.00  | 14.11 | 9.25   | 5.09  | 0.227 | 3.050 | 3.267 | 3.255 | 2.810 | 2.160 |
| VACO5   | MSI | WT      | WT | 0 | p.V600E | 4.74  | 6.94   | 6.55  | 7.99   | 8.42  | 0.253 | 3.017 | 3.038 | 3.201 | 3.517 | 2.073 |
| VACO6   | MSI | WT      | WT | 0 | p.V600E | 16.16 | 20.34  | 14.28 | 18.95  | 19.21 | 0.193 | 2.978 | 3.113 | 3.101 | 2.203 | 2.186 |
| WIDR    | MSS | WT      | WT | 0 | p.V600E | -6.12 | -5.45  | -6.32 | -4.01  | 2.36  | 0.288 | 2.977 | 2.973 | 3.165 | 2.677 | 2.051 |

**B. Medico et al. CRC cell lines (n=147) (3)---Pearson correlation analysis of *in vitro* growth inhibition (%) by 1, 10, 25, 50 and 100 µg/ml cetuximab**

| Pearson r       | 1 ug/ml Cetux | 10 ug/ml Cetux | 25 ug/ml Cetux | 50 ug/ml Cetux | 100ug/ml Cetux |
|-----------------|---------------|----------------|----------------|----------------|----------------|
| 1 ug/ml Cetux   |               | 0.976657       | 0.9621953      | 0.945606       | 0.9188743      |
| 10 ug/ml Cetux  | 0.976657      |                | 0.9797904      | 0.9662887      | 0.9488678      |
| 25 ug/ml Cetux  | 0.9621953     | 0.9797904      |                | 0.9788592      | 0.9645643      |
| 50 ug/ml Cetux  | 0.945606      | 0.9662887      | 0.9788592      |                | 0.9798188      |
| 100 ug/ml Cetux | 0.9188743     | 0.9488678      | 0.9645643      | 0.9798188      |                |
| <i>p</i> value  | 1ug/ml Cetux  | 10ug/ml Cetux  | 25ug/ml Cetux  | 50ug/ml Cetux  | 100ug/ml Cetux |
| 1 ug/ml Cetux   |               | 0.00000        | 0.00000        | 0.00000        | 0.00000        |
| 10 ug/ml Cetux  | 0.00000       |                | 0.00000        | 0.00000        | 0.00000        |
| 25 ug/ml Cetux  | 0.00000       | 0.00000        |                | 0.00000        | 0.00000        |
| 50 ug/ml Cetux  | 0.00000       | 0.00000        | 0.00000        |                | 0.00000        |
| 100 ug/ml Cetux | 0.00000       | 0.00000        | 0.00000        | 0.00000        |                |

**Supplementary Table S4. Moffitt CRCs (n=468) (4, 5)---Stages, MSI status, driver mutations and signature scores**

**Note:** The signature scores were calculated as described in Methods and merged with other molecular parameters as described previously (4, 5); 1 – mut; 0 – wt; A – APC truncating mutation; P – TP53 mutation; K – KRAS mutation; N – NRAS mutation; B – BRAF(V600E).

| Barcode  | Composite Staging | Tumor Location | Tumor Classification | Histotypes                                                      | MSI and Mutation Status |     |      |      |      |      |           | Signature Scores (gene expression) |                          |                           |                           |             |             |
|----------|-------------------|----------------|----------------------|-----------------------------------------------------------------|-------------------------|-----|------|------|------|------|-----------|------------------------------------|--------------------------|---------------------------|---------------------------|-------------|-------------|
|          |                   |                |                      |                                                                 | MSI-high                | APC | KRAS | NRAS | TP53 | BRAF | A/P/K/N/B | Cetuximab Sensitivity Score        | 18-gene RA pathway score | 64-gene Wnt pathway score | 24-gene Wnt Pathway score | EREG (log2) | AREG (log2) |
| DS-33635 | iv                | Left           | Metastatic           | Adenocarcinoma, NOS                                             | 0                       | 0   | 0    | 0    | 0    | 0    | WT        | 0.4744                             | 2.8179                   | 2.9483                    | 3.0279                    | 2.7303      | 3.0556      |
| DS-40199 | ii                | Right          | Primary              | Adenocarcinoma, NOS                                             | 0                       | 1   | 0    | 0    | 0    | 0    | A         | 0.5690                             | 2.6564                   | 2.9509                    | 3.0442                    | 3.1742      | 3.1717      |
| DS-40203 | ii                | Right          | Primary              | Adenocarcinoma, NOS                                             | 0                       | 1   | 1    | 0    | 0    | 0    | AK        | 0.4732                             | 2.8222                   | 3.0413                    | 3.0781                    | 2.7011      | 3.2021      |
| DS-40207 | iv                | Left           | Primary              | Adenocarcinoma, NOS                                             | 0                       | 0   | 0    | 0    | 1    | 0    | P         | 0.6482                             | 2.7209                   | 2.9615                    | 3.0776                    | 3.1242      | 3.2525      |
| DS-44604 | iii               | Left           | Metastatic           | Adenocarcinoma, NOS                                             | 0                       | 1   | 1    | 0    | 1    | 0    | APK       | 0.5705                             | 2.7745                   | 3.0227                    | 3.1025                    | 2.7666      | 3.0331      |
| DS-44863 | iii               | Left           | Metastatic           | Adenocarcinoma, NOS                                             | 0                       | 1   | 1    | 0    | 1    | 0    | APK       | 0.5990                             | 2.7774                   | 2.9850                    | 3.0584                    | 2.9497      | 3.0388      |
| DS-44878 | iv                | Left           | Metastatic           | Adenocarcinoma, NOS                                             | 0                       | 1   | 1    | 0    | 1    | 0    | APK       | 0.6375                             | 2.6496                   | 2.9038                    | 3.0219                    | 3.3285      | 3.4525      |
| DS-47369 | iii               | Left           | Metastatic           | Adenocarcinoma, NOS                                             | 0                       | 1   | 0    | 0    | 1    | 0    | AP        | 0.6955                             | 2.6897                   | 2.9552                    | 3.0481                    | 3.1728      | 3.3392      |
| DS-48055 | iii               | Right          | Metastatic           | Adenocarcinoma, NOS                                             | 0                       | 0   | 0    | 0    | 1    | 0    | P         | 0.5371                             | 2.7342                   | 2.9801                    | 3.0597                    | 3.0236      | 3.2045      |
| DS-48592 | ii                | Left           | Primary              | Adenocarcinoma, NOS                                             | 0                       | 1   | 0    | 0    | 1    | 0    | AP        | 0.6643                             | 2.7005                   | 2.9618                    | 3.1296                    | 2.8694      | 3.3777      |
| DS-48595 | iii               | Left           | Primary              | Adenocarcinoma, NOS                                             | 0                       | 1   | 0    | 0    | 1    | 0    | AP        | 0.7106                             | 2.5487                   | 2.8774                    | 3.0146                    | 3.2418      | 3.2855      |
| DS-48607 | iv                | Right          | Metastatic           | Adenocarcinoma, NOS                                             | 0                       | 1   | 1    | 0    | 0    | 0    | AK        | 0.4912                             | 2.7637                   | 3.0314                    | 3.0849                    | 2.9732      | 3.2393      |
| DS-48639 | ii                | Right          | Primary              | Adenocarcinoma, NOS                                             | 1                       | 0   | 0    | 0    | 0    | 1    | B         | 0.3690                             | 2.7810                   | 2.8460                    | 2.9092                    | 0.9273      | 2.7037      |
| DS-48645 | iv                | Right          | Primary              | Adenocarcinoma, NOS                                             | 1                       | 0   | 0    | 0    | 1    | 1    | PB        | 0.3189                             | 2.7521                   | 2.9061                    | 2.9099                    | 1.7567      | 2.8797      |
| DS-48649 | iii               | Right          | Primary              | Carcinoma, Signet Ring Cell (Greater Than 50% Signet Ring Cell) | 0                       | 1   | 0    | 0    | 0    | 0    | A         | 0.2590                             | 2.8413                   | 2.8990                    | 2.9585                    | 1.5186      | 2.9077      |
| DS-48655 | iii               | Left           | Primary              | Adenocarcinoma, NOS                                             | 0                       | 1   | 0    | 0    | 1    | 0    | AP        | 0.7083                             | 2.6925                   | 2.9839                    | 3.0841                    | 3.2791      | 3.4230      |
| DS-48658 | ii                | Right          | Primary              | Adenocarcinoma, NOS                                             | 1                       | 0   | 1    | 0    | 1    | 0    | PK        | 0.3879                             | 2.7444                   | 2.8859                    | 2.9992                    | 0.7733      | 2.4750      |
| DS-48670 | ii                | Left           | Primary              | Adenocarcinoma, NOS                                             | 0                       | 1   | 0    | 0    | 0    | 0    | A         | 0.5914                             | 2.7159                   | 2.9067                    | 2.9896                    | 3.1379      | 3.4056      |
| DS-48682 | iv                | Left           | Primary              | Adenocarcinoma, NOS                                             | 0                       | 1   | 0    | 0    | 1    | 0    | AP        | 0.6362                             | 2.7011                   | 2.9327                    | 3.0550                    | 3.2258      | 3.2758      |
| DS-48712 | iv                | Right          | Metastatic           | Adenocarcinoma, NOS                                             | 1                       | 0   | 0    | 0    | 0    | 1    | B         | 0.3670                             | 2.8376                   | 2.8286                    | 2.6778                    | 3.4738      | 3.3860      |
| DS-48717 | iv                | Left           | Metastatic           | Adenocarcinoma, NOS                                             | 0                       | 0   | 0    | 0    | 0    | 0    | WT        | 0.4650                             | 2.5774                   | 2.8252                    | 2.7094                    | 1.4882      | 3.1044      |
| DS-48725 | iv                | Left           | Primary              | Adenocarcinoma, NOS                                             | 0                       | 1   | 1    | 0    | 0    | 0    | AK        | 0.5812                             | 2.9097                   | 2.8789                    | 2.9680                    | 3.2630      | 3.4163      |
| DS-48739 | i                 | Left           | Primary              | Adenocarcinoma, NOS                                             | 0                       | 1   | 1    | 0    | 0    | 0    | AK        | 0.5835                             | 2.7669                   | 2.9837                    | 3.0956                    | 3.2325      | 3.3438      |
| DS-48764 | iii               | Left           | Primary              | Adenocarcinoma, NOS                                             | 0                       | 1   | 0    | 0    | 1    | 0    | AP        | 0.4374                             | 2.7087                   | 2.9448                    | 2.9477                    | 3.1919      | 3.4311      |
| DS-48778 | i                 | Left           | Primary              | Adenocarcinoma, NOS                                             | 0                       | 1   | 0    | 0    | 1    | 0    | AP        | 0.5550                             | 2.6598                   | 2.9299                    | 2.9975                    | 3.2769      | 3.4198      |
| DS-48788 | ii                | Left           | Primary              | Adenocarcinoma, NOS                                             | 0                       | 0   | 0    | 0    | 1    | 0    | P         | 0.7521                             | 2.6918                   | 2.9360                    | 3.0598                    | 3.4366      | 3.5287      |
| DS-48789 | iii               | Right          | Primary              | Adenocarcinoma, NOS                                             | 1                       | 1   | 0    | 0    | 0    | 0    | A         | 0.4875                             | 2.6708                   | 2.9395                    | 3.0508                    | 3.2550      | 3.3339      |
| DS-48795 | iv                | Right          | Metastatic           | Adenocarcinoma, NOS                                             | 0                       | 1   | 0    | 0    | 1    | 1    | APB       | 0.5035                             | 2.7549                   | 2.9207                    | 2.8760                    | 1.4004      | 2.8637      |
| DS-48808 | iii               | Right          | Primary              | Adenocarcinoma, NOS                                             | 0                       | 1   | 1    | 0    | 1    | 0    | APK       | 0.5379                             | 2.7438                   | 2.9493                    | 3.0405                    | 2.4468      | 3.0653      |
| DS-48823 | ii                | Left           | Primary              | Adenocarcinoma, NOS                                             | 0                       | 1   | 1    | 0    | 1    | 0    | APK       | 0.5987                             | 2.8110                   | 2.9615                    | 3.0463                    | 3.3899      | 3.4370      |
| DS-48827 | iv                | Right          | Primary              | Adenocarcinoma, NOS                                             | 0                       | 1   | 1    | 0    | 0    | 0    | AK        | 0.5188                             | 2.8341                   | 2.9879                    | 3.0531                    | 3.0079      | 3.0912      |
| DS-48833 | ii                | Left           | Primary              | Adenocarcinoma, NOS                                             | 0                       | 1   | 0    | 0    | 1    | 0    | AP        | 0.6841                             | 2.6895                   | 2.9800                    | 3.0535                    | 3.3367      | 3.4111      |
| DS-48857 | iv                | Left           | Primary              | Adenocarcinoma, NOS                                             | 0                       | 1   | 1    | 0    | 1    | 0    | APK       | 0.5771                             | 2.7784                   | 3.0085                    | 3.0906                    | 3.2531      | 3.4790      |
| DS-48888 | iv                | Right          | Primary              | Adenocarcinoma, NOS                                             | 0                       | 0   | 1    | 0    | 0    | 0    | K         | 0.4608                             | 2.8598                   | 2.9781                    | 2.8721                    | 3.2259      | 3.2416      |
| DS-48893 | iii               | Left           | Primary              | Adenocarcinoma, NOS                                             | 0                       | 0   | 0    | 0    | 1    | 0    | P         | 0.5948                             | 2.7434                   | 2.9985                    | 3.0723                    | 3.2575      | 3.2112      |
| DS-48894 | i                 | Left           | Metastatic           | Adenocarcinoma, NOS                                             | 0                       | 0   | 0    | 1    | 0    | 0    | N         | 0.3343                             | 2.7100                   | 2.8945                    | 2.8032                    | 3.2231      | 2.7041      |

|          |     |       |            |                                                      |   |   |   |   |   |   |     |        |        |        |        |        |        |
|----------|-----|-------|------------|------------------------------------------------------|---|---|---|---|---|---|-----|--------|--------|--------|--------|--------|--------|
| DS-48909 | ii  | Left  | Primary    | Adenocarcinoma, NOS                                  | 1 | 0 | 0 | 0 | 1 | 1 | PB  | 0.3740 | 2.8764 | 2.9275 | 2.9266 | 2.4339 | 3.3261 |
| DS-48913 | iii | Right | Primary    | Adenocarcinoma, NOS                                  | 1 | 0 | 0 | 0 | 0 | 0 | WT  | 0.3247 | 2.8462 | 2.9998 | 3.0022 | 2.2892 | 3.0260 |
| DS-48921 | i   | Right | Primary    | Adenocarcinoma, NOS                                  | 0 | 1 | 0 | 1 | 1 | 0 | APN | 0.5930 | 2.8878 | 2.9631 | 3.1214 | 3.2626 | 3.4042 |
| DS-48929 | iii | Right | Primary    | Adenocarcinoma, NOS                                  | 1 | 1 | 0 | 0 | 1 | 1 | APB | 0.2742 | 2.8743 | 2.9107 | 2.9009 | 2.8603 | 3.1139 |
| DS-48937 | ii  | Left  | Primary    | Adenocarcinoma, NOS                                  | 0 | 0 | 0 | 0 | 1 | 0 | P   | 0.7853 | 2.7001 | 2.8916 | 3.0266 | 2.9832 | 3.2793 |
| DS-48957 | ii  | Right | Primary    | Adenocarcinoma, NOS                                  | 0 | 0 | 0 | 0 | 1 | 0 | P   | 0.4230 | 2.7441 | 2.9737 | 2.9733 | 2.9403 | 3.1233 |
| DS-49116 | ii  | Left  | Primary    | Adenocarcinoma, NOS                                  | 0 | 1 | 0 | 0 | 1 | 0 | AP  | 0.7868 | 2.6407 | 2.9557 | 3.0574 | 3.3157 | 3.3934 |
| DS-49127 | ii  | Left  | Primary    | Adenocarcinoma, NOS                                  | 1 | 0 | 0 | 0 | 1 | 1 | PB  | 0.3302 | 2.8724 | 2.9562 | 3.0391 | 2.8879 | 3.2904 |
| DS-49208 | iv  | Right | Primary    | Adenocarcinoma, NOS                                  | 0 | 0 | 1 | 0 | 1 | 0 | PK  | 0.5422 | 2.8824 | 2.9561 | 2.9648 | 2.8292 | 2.9358 |
| DS-49315 | ii  | Left  | Primary    | Adenocarcinoma, NOS                                  | 0 | 0 | 0 | 0 | 1 | 0 | P   | 0.6085 | 2.7166 | 2.9314 | 3.0454 | 3.1016 | 3.1815 |
| DS-49325 | ii  | Left  | Primary    | Adenocarcinoma, NOS                                  | 0 | 1 | 1 | 0 | 0 | 0 | AK  | 0.4967 | 2.7646 | 2.9857 | 3.0886 | 2.7659 | 3.0447 |
| DS-49373 | ii  | Right | Primary    | Adenocarcinoma, NOS                                  | 1 | 0 | 0 | 0 | 0 | 1 | B   | 0.3141 | 2.9576 | 2.8791 | 2.9427 | 2.0938 | 3.0552 |
| DS-49375 | iii | Right | Primary    | Adenocarcinoma, NOS                                  | 0 | 1 | 1 | 0 | 1 | 0 | APK | 0.6326 | 2.8631 | 2.9997 | 3.1600 | 2.6603 | 2.9628 |
| DS-49395 | iii | Right | Primary    | Adenocarcinoma, NOS                                  | 0 | 1 | 0 | 0 | 1 | 0 | AP  | 0.6640 | 2.7092 | 2.9365 | 3.0843 | 3.1085 | 3.2325 |
| DS-49417 | i   | Left  | Primary    | Adenocarcinoma, NOS                                  | 0 | 1 | 0 | 0 | 0 | 0 | A   | 0.6890 | 2.5759 | 2.8849 | 3.0413 | 2.8910 | 3.0601 |
| DS-49422 | iv  | Right | Metastatic | Adenocarcinoma With Focal Mucinous Features          | 0 | 0 | 0 | 0 | 1 | 1 | PB  | 0.5392 | 2.8848 | 2.9311 | 3.0155 | 1.3721 | 2.4763 |
| DS-49425 | i   | Right | Primary    | Adenocarcinoma, NOS                                  | 0 | 1 | 1 | 0 | 1 | 0 | APK | 0.4890 | 2.8510 | 3.0088 | 3.0995 | 2.9795 | 3.3891 |
| DS-49435 | iv  | Right | Primary    | Adenocarcinoma, NOS                                  | 0 | 1 | 1 | 0 | 1 | 0 | APK | 0.5620 | 2.7827 | 2.8357 | 2.7250 | 3.3134 | 3.3730 |
| DS-49441 | ii  | Left  | Primary    | Adenocarcinoma, NOS                                  | 0 | 1 | 1 | 0 | 1 | 0 | APK | 0.7443 | 2.7729 | 2.9456 | 3.1249 | 2.5828 | 3.0250 |
| DS-49449 | iii | Right | Primary    | Adenocarcinoma, NOS                                  | 0 | 0 | 0 | 0 | 0 | 0 | WT  | 0.5816 | 2.7023 | 2.9355 | 2.9697 | 3.2775 | 3.2998 |
| DS-49454 | iii | Left  | Primary    | Adenocarcinoma, Mucinous (Greater Than 50% Mucinous) | 0 | 0 | 0 | 0 | 0 | 0 | WT  | 0.3174 | 2.7521 | 3.0024 | 3.0295 | 3.0770 | 3.2865 |
| DS-49459 | iii | Right | Primary    | Adenocarcinoma, NOS                                  | 0 | 1 | 1 | 0 | 1 | 0 | APK | 0.5606 | 2.8140 | 3.0281 | 3.1055 | 2.2651 | 2.8898 |
| DS-49496 | ii  | Right | Primary    | Adenocarcinoma, NOS                                  | 1 | 0 | 0 | 0 | 0 | 0 | WT  | 0.4063 | 2.7500 | 2.9234 | 2.9630 | 2.0708 | 2.8583 |
| DS-49498 | ii  | Left  | Primary    | Adenocarcinoma, NOS                                  | 0 | 1 | 0 | 0 | 1 | 0 | AP  | 0.6410 | 2.7744 | 3.0066 | 3.0936 | 3.0395 | 3.2828 |
| DS-49513 | i   | Left  | Primary    | Adenocarcinoma, NOS                                  | 0 | 0 | 0 | 0 | 1 | 0 | P   | 0.6096 | 2.6774 | 2.9201 | 3.0354 | 3.2507 | 3.3195 |
| DS-49637 | ii  | Left  | Primary    | Adenocarcinoma, NOS                                  | 0 | 1 | 1 | 0 | 1 | 0 | APK | 0.4860 | 2.8164 | 3.0435 | 3.0940 | 3.1153 | 3.2461 |
| DS-49639 | iv  | Left  | Metastatic | Adenocarcinoma, NOS                                  | 0 | 1 | 0 | 0 | 1 | 0 | AP  | 0.7456 | 2.6978 | 2.8208 | 3.0657 | 3.2974 | 3.4179 |
| DS-49664 | iv  | Left  | Primary    | Adenocarcinoma, Mucinous (Greater Than 50% Mucinous) | 0 | 0 | 0 | 0 | 0 | 0 | WT  | 0.3334 | 2.6883 | 2.8151 | 2.6987 | 2.5060 | 3.0811 |
| DS-49665 | ii  | Right | Primary    | Adenocarcinoma, Mucinous (Greater Than 50% Mucinous) | 1 | 0 | 0 | 0 | 0 | 1 | B   | 0.2644 | 2.8498 | 2.9044 | 2.8682 | 3.0610 | 3.1916 |
| DS-49669 | ii  | Right | Primary    | Adenocarcinoma, NOS                                  | 1 | 0 | 0 | 0 | 0 | 1 | B   | 0.3312 | 2.7589 | 2.9393 | 2.9644 | 2.1457 | 2.8616 |
| DS-49685 | iii | Right | Primary    | Adenocarcinoma, NOS                                  | 0 | 1 | 1 | 0 | 1 | 0 | APK | 0.6533 | 2.8131 | 2.9932 | 3.1443 | 3.2872 | 3.3989 |
| DS-49695 | iii | Left  | Primary    | Adenocarcinoma, NOS                                  | 0 | 1 | 1 | 0 | 0 | 0 | AK  | 0.6386 | 2.8029 | 2.9169 | 2.9931 | 3.0549 | 3.4326 |
| DS-49699 | iii | Right | Primary    | Adenocarcinoma, NOS                                  | 0 | 1 | 1 | 0 | 1 | 0 | APK | 0.6069 | 2.8159 | 3.0267 | 3.1538 | 3.2470 | 3.3867 |
| DS-49716 | iii | Left  | Primary    | Adenocarcinoma, NOS                                  | 0 | 1 | 0 | 0 | 1 | 0 | AP  | 0.8272 | 2.6020 | 2.8813 | 3.0300 | 3.1153 | 3.2527 |
| DS-49718 | iii | Left  | Primary    | Adenocarcinoma, NOS                                  | 0 | 1 | 1 | 0 | 1 | 0 | APK | 0.7215 | 2.7311 | 2.9547 | 3.0684 | 3.3891 | 3.4688 |
| DS-49730 | iv  | Left  | Primary    | Adenocarcinoma, NOS                                  | 0 | 1 | 1 | 0 | 1 | 0 | APK | 0.5379 | 2.8136 | 2.9282 | 3.0575 | 0.9206 | 2.5881 |
| DS-49796 | iii | Right | Primary    | Adenocarcinoma, NOS                                  | 0 | 1 | 1 | 0 | 1 | 0 | APK | 0.5065 | 2.7351 | 2.9674 | 3.0790 | 2.8231 | 3.1607 |
| DS-49826 | iii | Right | Metastatic | Adenocarcinoma, NOS                                  | 0 | 1 | 1 | 0 | 1 | 0 | APK | 0.4990 | 2.9338 | 3.0236 | 3.0324 | 2.7742 | 2.9908 |
| DS-49843 | i   | Right | Primary    | Adenocarcinoma, NOS                                  | 0 | 0 | 0 | 0 | 0 | 0 | WT  | 0.3163 | 2.7039 | 2.9705 | 2.9675 | 2.9851 | 3.0634 |
| DS-49844 | iv  | Left  | Metastatic | Adenocarcinoma, NOS                                  | 0 | 0 | 1 | 0 | 0 | 0 | K   | 0.4628 | 2.8901 | 3.0183 | 3.0807 | 3.1493 | 3.3315 |
| DS-50248 | ii  | Left  | Primary    | Adenocarcinoma, Mucinous (Greater Than 50% Mucinous) | 0 | 1 | 1 | 0 | 0 | 0 | AK  | 0.2924 | 2.8748 | 3.0021 | 3.1242 | 1.7804 | 3.1518 |
| DS-50258 | iv  | Right | Primary    | Adenocarcinoma, NOS                                  | 1 | 0 | 0 | 0 | 0 | 1 | B   | 0.3014 | 2.8667 | 2.9301 | 2.9265 | 1.7744 | 2.9474 |
| DS-50283 | iv  | Right | Primary    | Adenocarcinoma, NOS                                  | 0 | 1 | 1 | 0 | 1 | 0 | APK | 0.4702 | 2.8083 | 2.9875 | 3.0870 | 3.1746 | 3.4172 |
| DS-50521 | iii | Right | Primary    | Adenocarcinoma, NOS                                  | 0 | 1 | 1 | 0 | 1 | 0 | APK | 0.5897 | 2.8876 | 2.9459 | 3.0695 | 2.4481 | 2.6858 |
| DS-50529 | iii | Left  | Metastatic | Adenocarcinoma, NOS                                  | 0 | 1 | 0 | 0 | 1 | 0 | AP  | 0.7673 | 2.7295 | 2.9197 | 3.0405 | 3.2349 | 3.3457 |

|          |     |       |            |                                                      |   |   |   |   |   |   |     |        |        |        |        |        |        |
|----------|-----|-------|------------|------------------------------------------------------|---|---|---|---|---|---|-----|--------|--------|--------|--------|--------|--------|
| DS-50536 | iv  | Right | Primary    | Adenocarcinoma, NOS                                  | 0 | 1 | 1 | 0 | 0 | 0 | AK  | 0.4272 | 2.6596 | 2.9163 | 3.0102 | 1.0212 | 2.7620 |
| DS-50544 | ii  | Right | Primary    | Adenocarcinoma, NOS                                  | 0 | 0 | 0 | 0 | 1 | 0 | P   | 0.5260 | 2.6882 | 2.9336 | 3.0528 | 3.2256 | 3.4193 |
| DS-50568 | iii | Left  | Primary    | Adenocarcinoma, NOS                                  | 0 | 1 | 0 | 0 | 0 | 0 | A   | 0.7776 | 2.7512 | 2.9317 | 3.0403 | 3.3214 | 3.3944 |
| DS-50573 | i   | Right | Primary    | Adenocarcinoma, Mucinous (Greater Than 50% Mucinous) | 0 | 1 | 1 | 0 | 0 | 0 | AK  | 0.5157 | 2.6405 | 2.9247 | 3.1012 | 1.2478 | 2.6236 |
| DS-50587 | iii | Left  | Primary    | Adenocarcinoma, NOS                                  | 0 | 0 | 0 | 1 | 1 | 0 | PN  | 0.4831 | 2.8812 | 2.9307 | 2.9941 | 1.7313 | 2.7414 |
| DS-50597 | ii  | Right | Primary    | Adenocarcinoma, NOS                                  | 0 | 0 | 1 | 0 | 0 | 0 | K   | 0.4484 | 2.8092 | 3.0038 | 3.0438 | 2.9783 | 3.2182 |
| DS-50607 | iv  | Right | Primary    | Adenocarcinoma, NOS                                  | 0 | 0 | 0 | 0 | 1 | 1 | PB  | 0.4904 | 2.9158 | 2.9472 | 2.9894 | 1.9326 | 3.1054 |
| DS-50613 | ii  | Right | Primary    | Adenocarcinoma, NOS                                  | 0 | 1 | 0 | 0 | 1 | 0 | AP  | 0.7939 | 2.6669 | 2.9632 | 3.1407 | 3.4763 | 3.5853 |
| DS-50620 | iii | Left  | Primary    | Adenocarcinoma, NOS                                  | 0 | 0 | 0 | 0 | 0 | 1 | B   | 0.4693 | 2.7500 | 2.9373 | 3.0118 | 1.9252 | 2.9811 |
| DS-50626 | i   | Right | Primary    | Adenocarcinoma, NOS                                  | 0 | 1 | 1 | 0 | 0 | 0 | AK  | 0.3998 | 2.7771 | 2.9703 | 3.0446 | 3.1061 | 3.2854 |
| DS-50631 | iii | Left  | Primary    | Adenocarcinoma, NOS                                  | 0 | 0 | 0 | 0 | 0 | 0 | WT  | 0.2671 | 2.6602 | 2.9251 | 2.8804 | 2.9662 | 3.3419 |
| DS-50648 | i   | Right | Primary    | Adenocarcinoma, NOS                                  | 0 | 1 | 1 | 0 | 1 | 0 | APK | 0.5406 | 2.7653 | 2.9219 | 3.0184 | 2.3893 | 3.2773 |
| DS-50652 |     | Left  | Primary    | Adenocarcinoma, NOS                                  | 0 | 1 | 0 | 0 | 1 | 0 | AP  | 0.5485 | 2.6954 | 2.9778 | 3.0342 | 2.8775 | 3.1400 |
| DS-50685 | ii  | Right | Primary    | Adenocarcinoma, NOS                                  | 0 | 1 | 1 | 0 | 0 | 0 | AK  | 0.3163 | 2.7956 | 3.0115 | 3.0680 | 2.1333 | 3.3056 |
| DS-50687 | ii  | Right | Metastatic | Adenocarcinoma, NOS                                  | 0 | 1 | 0 | 1 | 1 | 0 | APN | 0.7369 | 2.7735 | 2.9971 | 3.1151 | 3.4485 | 3.4607 |
| DS-50692 | iii | Left  | Primary    | Adenocarcinoma, NOS                                  | 0 | 1 | 0 | 0 | 1 | 0 | AP  | 0.7594 | 2.7346 | 2.9875 | 3.1545 | 3.3873 | 3.4544 |
| DS-50698 | ii  | Right | Primary    | Adenocarcinoma With Focal Mucinous Features          | 1 | 0 | 0 | 0 | 1 | 1 | PB  | 0.2471 | 2.7591 | 2.9749 | 2.9290 | 2.4483 | 2.8846 |
| DS-50712 | ii  | Left  | Primary    | Adenocarcinoma, NOS                                  | 0 | 0 | 0 | 0 | 0 | 0 | WT  | 0.3438 | 2.6647 | 2.9580 | 2.9382 | 2.8671 | 3.2192 |
| DS-50720 | iii | Right | Primary    | Adenocarcinoma, NOS                                  | 1 | 1 | 0 | 0 | 0 | 1 | AB  | 0.3236 | 2.9067 | 2.9196 | 2.9925 | 2.2355 | 2.9380 |
| DS-50723 | iii | Left  | Primary    | Adenocarcinoma, NOS                                  | 0 | 1 | 0 | 0 | 1 | 0 | AP  | 0.7255 | 2.6713 | 2.8909 | 3.0479 | 3.4538 | 3.4628 |
| DS-50725 | iii | Left  | Primary    | Adenocarcinoma, NOS                                  | 0 | 1 | 0 | 0 | 1 | 0 | AP  | 0.6466 | 2.6693 | 2.9284 | 3.0232 | 3.1129 | 3.2581 |
| DS-50739 | i   | Left  | Primary    | Adenocarcinoma, NOS                                  | 0 | 1 | 0 | 0 | 1 | 0 | AP  | 0.6067 | 2.6721 | 3.0187 | 3.0883 | 3.3546 | 3.3932 |
| DS-50740 | ii  | Right | Primary    | Adenocarcinoma With Mucinous Differentiation         | 0 | 0 | 0 | 0 | 0 | 0 | WT  | 0.2586 | 2.7404 | 3.0271 | 3.0195 | 2.9514 | 3.2736 |
| DS-50754 | ii  | Right | Primary    | Adenocarcinoma, NOS                                  | 1 | 0 | 0 | 0 | 0 | 1 | B   | 0.2566 | 2.7673 | 2.8560 | 2.8142 | 2.6223 | 2.9908 |
| DS-50760 | i   | Right | Primary    | Adenocarcinoma, NOS                                  | 1 | 0 | 0 | 0 | 0 | 1 | B   | 0.3505 | 2.8131 | 2.9150 | 2.8905 | 3.0609 | 2.9946 |
| DS-50772 | iii | Right | Primary    | Adenocarcinoma, NOS                                  | 0 | 1 | 1 | 0 | 1 | 0 | APK | 0.5211 | 2.7359 | 2.9526 | 3.0765 | 3.3374 | 3.2279 |
| DS-50776 | i   | Right | Primary    | Adenocarcinoma, NOS                                  | 0 | 1 | 0 | 0 | 0 | 0 | A   | 0.4495 | 2.6714 | 2.9405 | 3.0423 | 2.0831 | 3.0297 |
| DS-50788 | ii  | Left  | Primary    | Adenocarcinoma, NOS                                  | 0 | 1 | 0 | 0 | 1 | 0 | AP  | 0.7046 | 2.7600 | 3.0286 | 3.1335 | 3.1603 | 3.3870 |
| DS-50796 | iii | Left  | Primary    | Adenocarcinoma, NOS                                  | 0 | 1 | 0 | 0 | 1 | 0 | AP  | 0.5850 | 2.6536 | 3.0100 | 3.1085 | 3.4312 | 3.4008 |
| DS-50805 | ii  | Left  | Primary    | Adenocarcinoma, NOS                                  | 0 | 1 | 0 | 0 | 1 | 0 | AP  | 0.6759 | 2.6285 | 2.9461 | 3.0433 | 3.4535 | 3.4195 |
| DS-50812 | ii  | Right | Primary    | Adenocarcinoma, NOS                                  | 0 | 1 | 0 | 1 | 0 | 0 | AN  | 0.6679 | 2.7994 | 2.9688 | 3.0429 | 3.3070 | 3.3718 |
| DS-50817 | iii | Right | Primary    | Adenocarcinoma, NOS                                  | 1 | 0 | 0 | 0 | 0 | 1 | B   | 0.4303 | 2.9786 | 2.8681 | 2.7871 | 3.4550 | 3.3934 |
| DS-50827 | i   | Left  | Primary    | Adenocarcinoma, NOS                                  | 0 | 1 | 1 | 0 | 0 | 0 | AK  | 0.4670 | 2.7360 | 3.0133 | 3.1008 | 3.0108 | 3.1431 |
| DS-50851 | iv  | Left  | Metastatic | Adenocarcinoma, NOS                                  | 0 | 1 | 0 | 0 | 1 | 0 | AP  | 0.6342 | 2.6799 | 2.9513 | 3.0556 | 3.3854 | 3.3917 |
| DS-50855 | ii  | Left  | Primary    | Adenocarcinoma, NOS                                  | 1 | 1 | 1 | 0 | 0 | 0 | AK  | 0.3020 | 2.7811 | 2.9583 | 2.9091 | 2.9545 | 3.2374 |
| DS-50877 | ii  | Right | Primary    | Adenocarcinoma, NOS                                  | 1 | 1 | 1 | 0 | 0 | 0 | AK  | 0.6221 | 2.8886 | 3.0287 | 3.1391 | 3.0301 | 3.4309 |
| DS-50890 | iv  | Right | Primary    | Adenocarcinoma, NOS                                  | 0 | 1 | 0 | 1 | 0 | 0 | AN  | 0.5497 | 2.8137 | 2.8914 | 3.0442 | 1.3025 | 2.5515 |
| DS-50896 | i   | Left  | Primary    | Adenocarcinoma, NOS                                  | 0 | 1 | 0 | 0 | 1 | 0 | AP  | 0.7308 | 2.6218 | 2.8626 | 2.9798 | 3.2349 | 3.3696 |
| DS-50925 | iii | Left  | Primary    | Adenocarcinoma, NOS                                  | 0 | 0 | 1 | 0 | 1 | 0 | PK  | 0.4557 | 2.8441 | 2.9893 | 2.9970 | 2.7957 | 3.2412 |
| DS-50931 | iv  | Right | Primary    | Adenocarcinoma, NOS                                  | 0 | 1 | 1 | 0 | 1 | 0 | APK | 0.6592 | 2.7560 | 2.9278 | 3.0551 | 3.1463 | 3.3326 |
| DS-51018 | iii | Left  | Primary    | Adenocarcinoma, NOS                                  | 0 | 1 | 0 | 0 | 1 | 0 | AP  | 0.5747 | 2.6373 | 2.9146 | 2.9870 | 3.1094 | 3.1587 |
| DS-51020 | i   | Right | Primary    | Adenocarcinoma, NOS                                  | 0 | 0 | 0 | 0 | 0 | 0 | WT  | 0.3471 | 2.7246 | 2.9780 | 2.9732 | 2.2712 | 2.9802 |
| DS-51028 | iv  | Right | Primary    | Adenocarcinoma, NOS                                  | 0 | 1 | 1 | 0 | 0 | 0 | AK  | 0.4948 | 2.8325 | 2.8968 | 2.9576 | 2.7476 | 3.3246 |
| DS-51043 | iv  | Left  | Metastatic | Adenocarcinoma, NOS                                  | 0 | 0 | 1 | 0 | 1 | 0 | PK  | 0.6335 | 2.7759 | 2.9918 | 3.0536 | 3.3785 | 3.4548 |
| DS-51050 | i   | Left  | Metastatic | Adenocarcinoma, NOS                                  | 0 | 1 | 1 | 0 | 1 | 0 | APK | 0.4595 | 2.7438 | 3.0294 | 3.0728 | 3.0292 | 3.0128 |
| DS-51086 | ii  | Right | Primary    | Adenocarcinoma, NOS                                  | 1 | 1 | 0 | 0 | 0 | 1 | AB  | 0.2937 | 2.8508 | 2.9422 | 2.9717 | 2.2535 | 2.9468 |
| DS-51087 | iii | Right | Primary    | Adenocarcinoma, NOS                                  | 0 | 1 | 0 | 0 | 0 | 0 | A   | 0.7330 | 2.5839 | 2.9075 | 3.0415 | 3.0402 | 2.8373 |

|          |     |       |            |                                                                 |   |   |   |   |   |   |     |        |        |        |        |        |        |
|----------|-----|-------|------------|-----------------------------------------------------------------|---|---|---|---|---|---|-----|--------|--------|--------|--------|--------|--------|
| DS-51088 | iv  | Left  | Primary    | Adenocarcinoma, NOS                                             | 0 | 1 | 1 | 0 | 0 | 0 | AK  | 0.5112 | 2.8348 | 3.0144 | 3.1725 | 3.2055 | 3.1213 |
| DS-51121 | ii  | Right | Primary    | Adenocarcinoma, NOS                                             | 0 | 1 | 0 | 0 | 1 | 0 | AP  | 0.7061 | 2.6392 | 2.9606 | 3.0701 | 3.1396 | 3.3800 |
| DS-51155 | ii  | Right | Primary    | Adenocarcinoma, NOS                                             | 1 | 0 | 1 | 0 | 0 | 0 | K   | 0.3693 | 2.8026 | 2.9374 | 2.8967 | 2.6785 | 3.2576 |
| DS-51156 | iii | Left  | Primary    | Adenocarcinoma, NOS                                             | 1 | 1 | 1 | 0 | 0 | 0 | AK  | 0.3951 | 2.7488 | 2.8911 | 2.9416 | 2.1866 | 2.9260 |
| DS-51202 | iii | Right | Primary    | Adenocarcinoma, NOS                                             | 0 | 1 | 1 | 0 | 1 | 0 | APK | 0.6046 | 2.8489 | 2.9372 | 3.0484 | 2.8784 | 3.2595 |
| DS-51215 | ii  | Right | Primary    | Adenocarcinoma, NOS                                             | 1 | 0 | 0 | 0 | 0 | 1 | B   | 0.3106 | 2.8366 | 2.9703 | 2.9673 | 2.1138 | 2.9828 |
| DS-51220 | ii  | Right | Primary    | Adenocarcinoma, NOS                                             | 1 | 1 | 0 | 0 | 0 | 0 | A   | 0.4120 | 2.7617 | 2.9745 | 3.0649 | 2.5152 | 3.3310 |
| DS-51527 | iii | Left  | Primary    | Adenocarcinoma, NOS                                             | 0 | 1 | 0 | 0 | 1 | 0 | AP  | 0.6075 | 2.7078 | 3.0296 | 3.0980 | 3.2595 | 3.3643 |
| DS-51528 | iv  | Right | Primary    | Adenocarcinoma, NOS                                             | 0 | 1 | 1 | 0 | 0 | 0 | AK  | 0.3447 | 2.8273 | 2.9348 | 2.9822 | 1.7128 | 2.9332 |
| DS-51531 | ii  | Left  | Primary    | Adenocarcinoma, NOS                                             | 0 | 1 | 1 | 0 | 1 | 0 | APK | 0.5178 | 2.8130 | 3.0084 | 3.1110 | 2.9573 | 3.1647 |
| DS-51584 | ii  | Right | Primary    | Adenocarcinoma, Mucinous (Greater Than 50% Mucinous)            | 1 | 0 | 0 | 0 | 1 | 0 | P   | 0.2645 | 2.8795 | 2.9287 | 2.9919 | 2.1728 | 2.8264 |
| DS-51610 | ii  | Left  | Primary    | Adenocarcinoma, NOS                                             | 0 | 0 | 1 | 0 | 1 | 0 | PK  | 0.4327 | 2.8582 | 2.9491 | 3.0118 | 3.1903 | 3.3255 |
| DS-51630 | iii | Left  | Primary    | Adenocarcinoma, NOS                                             | 0 | 1 | 0 | 0 | 0 | 0 | A   | 0.3791 | 2.6056 | 2.9212 | 2.9609 | 3.0113 | 3.1042 |
| DS-51652 | ii  | Left  | Metastatic | Adenocarcinoma, NOS                                             | 0 | 0 | 1 | 0 | 1 | 0 | PK  | 0.4728 | 2.8689 | 2.9696 | 3.0318 | 2.9939 | 3.0928 |
| DS-51671 | iii | Right | Primary    | Adenocarcinoma, NOS                                             | 1 | 0 | 0 | 0 | 0 | 1 | B   | 0.4388 | 2.8071 | 2.8113 | 2.6942 | 3.4502 | 3.5099 |
| DS-51676 | iii | Right | Primary    | Adenocarcinoma, NOS                                             | 0 | 1 | 1 | 0 | 0 | 0 | AK  | 0.5218 | 2.8277 | 2.9895 | 3.0608 | 2.8846 | 3.2703 |
| DS-51679 | iii | Left  | Primary    | Adenocarcinoma, NOS                                             | 0 | 1 | 0 | 0 | 1 | 0 | AP  | 0.5548 | 2.6770 | 3.0091 | 3.0600 | 3.1930 | 3.2695 |
| DS-51680 | iv  | Left  | Primary    | Adenocarcinoma, NOS                                             | 0 | 1 | 1 | 0 | 1 | 0 | APK | 0.6616 | 2.8007 | 2.9982 | 3.1147 | 2.1453 | 2.9651 |
| DS-51711 | iii | Right | Primary    | Adenocarcinoma With Signet Ring Cell Features                   | 1 | 0 | 0 | 0 | 0 | 1 | B   | 0.3419 | 2.8107 | 2.9273 | 2.9616 | 2.0505 | 2.6757 |
| DS-51754 | ii  | Right | Primary    | Adenocarcinoma, NOS                                             | 0 | 0 | 1 | 0 | 0 | 0 | K   | 0.4261 | 2.8652 | 3.0675 | 3.0737 | 2.9941 | 3.1891 |
| DS-51766 | iii | Left  | Primary    | Adenocarcinoma, Mucinous (Greater Than 50% Mucinous)            | 0 | 1 | 0 | 0 | 0 | 0 | A   | 0.3397 | 2.8072 | 3.0413 | 3.0295 | 2.6596 | 3.1402 |
| DS-51769 | iii | Right | Primary    | Adenocarcinoma, NOS                                             | 0 | 1 | 0 | 0 | 1 | 1 | APB | 0.4652 | 2.8740 | 2.9194 | 2.8536 | 3.1165 | 3.1705 |
| DS-51783 | ii  | Right | Primary    | Adenocarcinoma, NOS                                             | 1 | 0 | 0 | 0 | 0 | 1 | B   | 0.3173 | 2.7905 | 2.9606 | 2.9942 | 2.2955 | 3.0044 |
| DS-51797 | iv  | Right | Metastatic | Adenocarcinoma, NOS                                             | 0 | 1 | 1 | 0 | 1 | 0 | APK | 0.4991 | 2.7545 | 2.9836 | 3.0731 | 3.1896 | 3.2047 |
| DS-51798 | ii  | Right | Primary    | Carcinoma, Signet Ring Cell (Greater Than 50% Signet Ring Cell) | 1 | 0 | 0 | 0 | 0 | 1 | B   | 0.3012 | 2.7649 | 2.9074 | 2.9343 | 1.4966 | 2.3192 |
| DS-51803 | iv  | Right | Metastatic | Adenocarcinoma, NOS                                             | 0 | 1 | 0 | 0 | 0 | 0 | A   | 0.4183 | 2.7235 | 3.0051 | 2.9555 | 3.0883 | 3.1533 |
| DS-51809 | iii | Left  | Metastatic | Adenocarcinoma, NOS                                             | 0 | 0 | 0 | 0 | 1 | 0 | P   | 0.4094 | 2.6099 | 2.8473 | 2.8123 | 2.4499 | 2.7518 |
| DS-51821 | iv  | Left  | Metastatic | Adenocarcinoma, NOS                                             | 0 | 1 | 1 | 0 | 1 | 0 | APK | 0.7050 | 2.5801 | 2.9542 | 3.1302 | 3.2503 | 3.3581 |
| DS-51827 | i   | Right | Primary    | Adenocarcinoma, NOS                                             | 1 | 0 | 0 | 0 | 1 | 0 | P   | 0.2918 | 2.8226 | 2.9556 | 3.0130 | 2.1948 | 3.1346 |
| DS-51875 | iv  | Right | Metastatic | Adenocarcinoma, NOS                                             | 0 | 1 | 1 | 0 | 1 | 0 | APK | 0.5475 | 2.8837 | 3.0626 | 3.0901 | 3.1503 | 3.2968 |
| DS-51877 | iv  | Left  | Metastatic | Adenocarcinoma, NOS                                             | 0 | 0 | 1 | 0 | 0 | 0 | K   | 0.4626 | 2.7489 | 2.9720 | 3.0832 | 2.6858 | 3.2736 |
| DS-51878 | iv  | Left  | Metastatic | Adenocarcinoma, NOS                                             | 0 | 1 | 0 | 0 | 1 | 0 | AP  | 0.6339 | 2.6957 | 2.9585 | 3.0734 | 3.2414 | 3.4201 |
| DS-51886 | ii  | Right | Primary    | Adenocarcinoma, Mucinous (Greater Than 50% Mucinous)            | 1 | 0 | 0 | 0 | 0 | 0 | WT  | 0.3799 | 2.9067 | 2.8884 | 2.9569 | 0.7556 | 2.7982 |
| DS-51893 | iv  | Left  | Primary    | Adenocarcinoma, NOS                                             | 1 | 0 | 1 | 0 | 0 | 0 | K   | 0.3164 | 2.7982 | 2.7827 | 2.6810 | 3.3670 | 3.2207 |
| DS-51918 | iii | Left  | Primary    | Adenocarcinoma, NOS                                             | 0 | 1 | 0 | 0 | 1 | 0 | AP  | 0.7174 | 2.6720 | 2.8998 | 2.9915 | 3.3378 | 3.4144 |
| DS-51923 | iii | Left  | Primary    | Adenocarcinoma, NOS                                             | 0 | 1 | 0 | 0 | 1 | 0 | AP  | 0.5788 | 2.4915 | 2.8513 | 2.9673 | 2.7995 | 2.8426 |
| DS-51932 | i   | Left  | Primary    | Adenocarcinoma, NOS                                             | 0 | 1 | 0 | 0 | 1 | 0 | AP  | 0.6331 | 2.6169 | 2.9563 | 3.0712 | 3.2238 | 3.3868 |
| DS-51948 | ii  | Left  | Primary    | Carcinoma, NOS                                                  | 0 | 0 | 1 | 0 | 0 | 0 | K   | 0.3251 | 2.7072 | 2.8357 | 2.5921 | 3.1286 | 2.3582 |
| DS-51952 | iii | Left  | Primary    | Adenocarcinoma, NOS                                             | 1 | 1 | 1 | 0 | 0 | 0 | AK  | 0.3538 | 2.8744 | 2.9398 | 2.8931 | 3.2141 | 3.3039 |
| DS-51972 | iii | Right | Metastatic | Adenocarcinoma, NOS                                             | 0 | 0 | 1 | 0 | 0 | 0 | K   | 0.4861 | 2.7805 | 3.0008 | 2.9851 | 3.1965 | 3.3233 |
| DS-51977 | iii | Left  | Metastatic | Adenocarcinoma, NOS                                             | 0 | 1 | 1 | 0 | 1 | 0 | APK | 0.6704 | 2.8194 | 2.9553 | 3.0971 | 3.0530 | 3.2814 |
| DS-51982 | ii  | Right | Primary    | Adenocarcinoma, Mucinous (Greater Than 50% Mucinous)            | 1 | 0 | 0 | 0 | 1 | 1 | PB  | 0.2808 | 2.8683 | 2.9037 | 2.8738 | 2.7814 | 3.1992 |
| DS-51984 | iv  | Left  | Primary    | Adenocarcinoma, NOS                                             | 0 | 1 | 1 | 0 | 1 | 0 | APK | 0.6576 | 2.7436 | 2.9716 | 3.1039 | 3.0107 | 3.3532 |

|          |     |       |            |                                                      |   |   |   |   |   |   |     |        |        |        |        |        |        |
|----------|-----|-------|------------|------------------------------------------------------|---|---|---|---|---|---|-----|--------|--------|--------|--------|--------|--------|
| DS-51995 | i   | Right | Primary    | Adenocarcinoma, NOS                                  | 0 | 0 | 0 | 0 | 0 | 0 | WT  | 0.3748 | 2.7478 | 2.9366 | 2.8212 | 2.4224 | 3.0595 |
| DS-51997 | ii  | Left  | Primary    | Adenocarcinoma, NOS                                  | 0 | 1 | 0 | 0 | 0 | 0 | A   | 0.6411 | 2.6317 | 2.9688 | 3.0294 | 3.3351 | 3.4480 |
| DS-51998 | i   | Left  | Primary    | Adenocarcinoma, NOS                                  | 0 | 1 | 1 | 0 | 0 | 0 | AK  | 0.3449 | 2.8491 | 2.9349 | 2.9834 | 1.2946 | 3.2177 |
| DS-52005 | iii | Right | Primary    | Adenocarcinoma, NOS                                  | 0 | 0 | 0 | 0 | 1 | 1 | PB  | 0.4903 | 2.9035 | 3.0022 | 3.0710 | 2.9269 | 3.0227 |
| DS-52022 | iii | Left  | Metastatic | Adenocarcinoma, NOS                                  | 0 | 1 | 0 | 0 | 1 | 0 | AP  | 0.6793 | 2.6972 | 2.9835 | 3.0545 | 3.1919 | 3.3732 |
| DS-52095 | ii  | Right | Primary    | Adenocarcinoma, NOS                                  | 1 | 0 | 0 | 0 | 0 | 1 | B   | 0.4135 | 2.8539 | 2.9349 | 2.9281 | 2.8187 | 3.0216 |
| DS-52111 | ii  | Left  | Primary    | Adenocarcinoma, NOS                                  | 0 | 1 | 1 | 0 | 0 | 0 | AK  | 0.5136 | 2.7631 | 2.9847 | 3.0634 | 2.6905 | 3.3404 |
| DS-52121 | 0   | Right | Primary    | Adenocarcinoma, NOS                                  | 0 | 1 | 1 | 0 | 0 | 0 | AK  | 0.3590 | 2.6835 | 2.9865 | 3.1066 | 2.2596 | 2.9190 |
| DS-52122 | iii | Right | Primary    | Adenocarcinoma With Signet Ring Cell Features        | 0 | 1 | 0 | 1 | 1 | 0 | APN | 0.3870 | 2.8084 | 2.9808 | 3.0106 | 2.9750 | 3.3114 |
| DS-52126 | iii | Left  | Primary    | Adenocarcinoma, NOS                                  | 0 | 0 | 0 | 0 | 0 | 0 | WT  | 0.5494 | 2.8808 | 2.9184 | 2.9769 | 1.9032 | 3.2182 |
| DS-52131 | iii | Left  | Metastatic | Adenocarcinoma, NOS                                  | 0 | 1 | 0 | 0 | 1 | 0 | AP  | 0.5680 | 2.7992 | 3.0012 | 3.0735 | 3.4325 | 3.5069 |
| DS-52151 | iv  | Left  | Primary    | Adenocarcinoma, NOS                                  | 0 | 1 | 0 | 0 | 1 | 0 | AP  | 0.5573 | 2.7530 | 3.0352 | 3.0790 | 3.3179 | 3.4382 |
| DS-52210 | iv  | Right | Primary    | Adenocarcinoma, Mucinous (Greater Than 50% Mucinous) | 0 | 1 | 0 | 0 | 1 | 0 | AP  | 0.2827 | 2.8366 | 2.9121 | 2.9198 | 2.8044 | 3.0815 |
| DS-52232 | iii | Left  | Primary    | Adenocarcinoma, NOS                                  | 0 | 1 | 0 | 0 | 1 | 0 | AP  | 0.6945 | 2.6557 | 2.9086 | 2.9719 | 3.2827 | 3.3990 |
| DS-52320 | iv  | Left  | Metastatic | Adenocarcinoma, NOS                                  | 0 | 1 | 1 | 0 | 1 | 0 | APK | 0.6288 | 2.7995 | 3.0028 | 3.1137 | 3.1811 | 3.3688 |
| DS-52359 | i   | Left  | Primary    | Adenocarcinoma, NOS                                  | 0 | 1 | 1 | 0 | 0 | 0 | AK  | 0.5438 | 2.6491 | 2.9099 | 2.9872 | 2.6238 | 3.0061 |
| DS-52367 |     | Right | Primary    | Adenocarcinoma, NOS                                  | 0 | 0 | 0 | 0 | 1 | 0 | P   | 0.5146 | 2.6434 | 2.9625 | 2.8885 | 3.1999 | 3.4913 |
| DS-52369 | iv  | Left  | Primary    | Adenocarcinoma, NOS                                  | 0 | 1 | 0 | 0 | 1 | 0 | AP  | 0.6836 | 2.6718 | 2.9415 | 3.0307 | 3.2841 | 3.4381 |
| DS-52569 | i   | Left  | Primary    | Adenocarcinoma, NOS                                  | 0 | 1 | 0 | 1 | 1 | 0 | APN | 0.7346 | 2.7355 | 2.9336 | 3.0795 | 3.4845 | 3.4885 |
| DS-52681 | iii | Left  | Metastatic | Adenocarcinoma, NOS                                  | 0 | 1 | 1 | 0 | 1 | 0 | APK | 0.5352 | 2.7972 | 2.9612 | 3.0931 | 3.1266 | 3.2721 |
| DS-52756 | ii  | Left  | Primary    | Adenocarcinoma, NOS                                  | 0 | 1 | 1 | 0 | 0 | 0 | AK  | 0.4490 | 2.7246 | 2.9870 | 2.9988 | 3.0745 | 3.2509 |
| DS-52771 | ii  | Left  | Primary    | Adenocarcinoma, NOS                                  | 0 | 1 | 1 | 0 | 1 | 0 | APK | 0.7405 | 2.7124 | 2.8712 | 2.9722 | 2.7716 | 2.8465 |
| DS-52790 | ii  | Right | Metastatic | Adenocarcinoma, NOS                                  | 0 | 1 | 1 | 0 | 0 | 0 | AK  | 0.4430 | 2.8074 | 2.9951 | 2.9871 | 2.9847 | 3.1808 |
| DS-52815 | iii | Left  | Primary    | Adenocarcinoma, NOS                                  | 1 | 1 | 1 | 0 | 1 | 0 | APK | 0.3882 | 2.7234 | 2.8524 | 2.9433 | 1.4651 | 2.8613 |
| DS-52837 | iii | Left  | Primary    | Adenocarcinoma, Mucinous (Greater Than 50% Mucinous) | 0 | 1 | 1 | 0 | 0 | 0 | AK  | 0.3787 | 2.7702 | 3.0296 | 2.9813 | 3.0000 | 3.2885 |
| DS-52838 | i   | Left  | Primary    | Adenocarcinoma, NOS                                  | 0 | 1 | 0 | 0 | 1 | 0 | AP  | 0.6242 | 2.7306 | 2.9722 | 3.0446 | 3.3957 | 3.4478 |
| DS-52847 | iii | Right | Primary    | Adenocarcinoma, NOS                                  | 0 | 0 | 1 | 0 | 1 | 0 | PK  | 0.6246 | 2.7036 | 2.9379 | 3.0536 | 3.1966 | 3.2176 |
| DS-52853 | iv  | Right | Metastatic | Adenocarcinoma, NOS                                  | 0 | 1 | 0 | 0 | 1 | 0 | AP  | 0.6407 | 2.7303 | 2.9637 | 3.0395 | 3.2521 | 3.2933 |
| DS-52864 | iii | Right | Primary    | Adenocarcinoma, NOS                                  | 1 | 0 | 1 | 0 | 0 | 0 | K   | 0.4123 | 2.7648 | 2.8873 | 3.0022 | 2.5397 | 3.2041 |
| DS-52871 | ii  | Right | Primary    | Adenocarcinoma, NOS                                  | 0 | 1 | 1 | 0 | 0 | 0 | AK  | 0.4191 | 2.7960 | 2.9345 | 2.9636 | 2.6841 | 3.2251 |
| DS-52882 | iii | Left  | Primary    | Adenocarcinoma, NOS                                  | 0 | 1 | 1 | 0 | 1 | 0 | APK | 0.6430 | 2.7785 | 2.9738 | 3.1090 | 3.1208 | 3.3015 |
| DS-52888 | i   | Right | Primary    | Adenocarcinoma, NOS                                  | 0 | 1 | 1 | 0 | 0 | 0 | AK  | 0.4055 | 2.7772 | 2.9344 | 3.0868 | 1.6396 | 2.9577 |
| DS-52889 | ii  | Right | Primary    | Adenocarcinoma, NOS                                  | 0 | 1 | 1 | 0 | 1 | 0 | APK | 0.6030 | 2.7535 | 2.8852 | 2.9874 | 2.7576 | 3.0840 |
| DS-52912 | ii  | Right | Primary    | Adenocarcinoma, NOS                                  | 1 | 1 | 0 | 0 | 0 | 0 | A   | 0.3971 | 2.7727 | 2.9361 | 3.0014 | 3.3100 | 3.2688 |
| DS-52925 | ii  | Right | Primary    | Adenocarcinoma, NOS                                  | 0 | 0 | 0 | 0 | 1 | 1 | PB  | 0.4920 | 2.8294 | 2.9856 | 3.0223 | 2.7844 | 2.9121 |
| DS-52929 | iv  | Left  | Primary    | Adenocarcinoma, NOS                                  | 1 | 0 | 0 | 0 | 0 | 1 | B   | 0.2925 | 2.8962 | 2.9438 | 2.9220 | 2.7529 | 3.0028 |
| DS-52940 | iii | Left  | Primary    | Adenocarcinoma, NOS                                  | 0 | 1 | 1 | 0 | 1 | 0 | APK | 0.4989 | 2.7550 | 2.9976 | 3.0585 | 2.8163 | 2.9664 |
| DS-52942 | ii  | Left  | Primary    | Adenocarcinoma, NOS                                  | 0 | 1 | 0 | 0 | 1 | 0 | AP  | 0.6941 | 2.6760 | 2.8814 | 2.9729 | 3.1199 | 3.3271 |
| DS-52979 | ii  | Right | Primary    | Adenocarcinoma, NOS                                  | 0 | 1 | 1 | 0 | 0 | 0 | AK  | 0.3628 | 2.8368 | 3.0180 | 3.1429 | 2.2936 | 3.0113 |
| DS-52992 | iv  | Left  | Primary    | Adenocarcinoma, NOS                                  | 0 | 1 | 1 | 0 | 0 | 0 | AK  | 0.4687 | 2.8292 | 3.0184 | 3.0254 | 3.1928 | 3.2966 |
| DS-53052 | iii | Left  | Primary    | Adenocarcinoma, Mucinous (Greater Than 50% Mucinous) | 0 | 1 | 1 | 0 | 0 | 0 | AK  | 0.4373 | 2.7360 | 2.8848 | 2.9472 | 2.4390 | 3.0656 |
| DS-53053 | iii | Left  | Primary    | Adenocarcinoma, NOS                                  | 0 | 0 | 0 | 0 | 1 | 1 | PB  | 0.4431 | 2.8142 | 2.9018 | 2.9348 | 2.0033 | 2.8316 |
| DS-53055 | iii | Right | Primary    | Adenocarcinoma, NOS                                  | 0 | 1 | 0 | 0 | 1 | 0 | AP  | 0.5831 | 2.7525 | 2.9406 | 3.0178 | 2.0818 | 2.5758 |
| DS-53059 | iv  | Left  | Metastatic | Adenocarcinoma, NOS                                  | 0 | 0 | 0 | 0 | 1 | 1 | PB  | 0.4972 | 2.7505 | 2.9238 | 2.9342 | 2.7238 | 3.2128 |
| DS-53095 | ii  | Right | Primary    | Adenocarcinoma, NOS                                  | 0 | 1 | 0 | 0 | 1 | 0 | AP  | 0.6285 | 2.7438 | 2.9538 | 3.0358 | 3.0697 | 3.3226 |
| DS-53114 | iv  | Left  | Primary    | Adenocarcinoma, NOS                                  | 0 | 0 | 0 | 0 | 1 | 0 | P   | 0.5330 | 2.7182 | 2.9888 | 3.0114 | 3.2090 | 3.3571 |

|          |     |       |            |                                                      |   |   |   |   |   |   |     |        |        |        |        |        |        |
|----------|-----|-------|------------|------------------------------------------------------|---|---|---|---|---|---|-----|--------|--------|--------|--------|--------|--------|
| DS-53115 | iv  | Left  | Metastatic | Adenocarcinoma, NOS                                  | 0 | 1 | 0 | 0 | 1 | 0 | AP  | 0.6563 | 2.7384 | 2.9772 | 3.0881 | 3.4529 | 3.5140 |
| DS-53116 | ii  | Right | Primary    | Adenocarcinoma, NOS                                  | 0 | 0 | 1 | 0 | 1 | 0 | PK  | 0.5625 | 2.7539 | 2.9698 | 3.0297 | 3.3721 | 3.4601 |
| DS-53117 | i   | Left  | Primary    | Adenocarcinoma, Mucinous                             | 0 | 0 | 0 | 0 | 0 | 1 | B   | 0.3596 | 2.8048 | 2.9373 | 2.9179 | 1.9745 | 3.3521 |
| DS-53121 | iv  | Left  | Primary    | Adenocarcinoma, NOS                                  | 0 | 1 | 0 | 0 | 1 | 0 | AP  | 0.6406 | 2.6606 | 2.9687 | 3.1231 | 3.3359 | 3.2412 |
| DS-53129 | iii | Left  | Metastatic | Adenocarcinoma, NOS                                  | 0 | 1 | 1 | 0 | 1 | 0 | APK | 0.6807 | 2.8303 | 2.9631 | 3.0258 | 2.6091 | 3.2237 |
| DS-53132 | ii  | Right | Primary    | Adenocarcinoma, NOS                                  | 0 | 1 | 0 | 0 | 0 | 0 | A   | 0.5445 | 2.7717 | 2.9590 | 2.9351 | 3.3223 | 3.4460 |
| DS-53138 | ii  | Left  | Primary    | Adenocarcinoma, NOS                                  | 0 | 1 | 0 | 1 | 1 | 0 | APN | 0.5994 | 2.6881 | 2.9317 | 3.0688 | 3.1579 | 3.3328 |
| DS-53139 | iv  | Right | Primary    | Adenocarcinoma, Mucinous (Greater Than 50% Mucinous) | 0 | 1 | 1 | 0 | 0 | 0 | AK  | 0.2994 | 2.8452 | 2.9247 | 3.0083 | 1.2097 | 2.6060 |
| DS-53143 | ii  | Left  | Primary    | Adenocarcinoma, NOS                                  | 0 | 1 | 0 | 0 | 1 | 0 | AP  | 0.5371 | 2.7142 | 2.9600 | 3.0706 | 3.2387 | 3.4550 |
| DS-53146 | iii | Right | Primary    | Adenocarcinoma, NOS                                  | 0 | 1 | 1 | 0 | 1 | 0 | APK | 0.4854 | 2.7820 | 2.9620 | 2.9787 | 3.0193 | 3.1767 |
| DS-53156 | iii | Left  | Metastatic | Adenocarcinoma, NOS                                  | 0 | 1 | 1 | 0 | 1 | 0 | APK | 0.6116 | 2.8696 | 2.9996 | 3.1242 | 3.3780 | 3.4159 |
| DS-53168 | i   | Right | Primary    | Adenocarcinoma, NOS                                  | 0 | 0 | 0 | 0 | 1 | 0 | P   | 0.4597 | 2.6697 | 2.9378 | 2.9990 | 3.2711 | 3.2919 |
| DS-53189 | iii | Right | Primary    | Adenocarcinoma, NOS                                  | 0 | 1 | 1 | 0 | 1 | 0 | APK | 0.7141 | 2.8041 | 2.9035 | 3.0716 | 3.2584 | 3.2020 |
| DS-53191 | iii | Left  | Metastatic | Adenocarcinoma, NOS                                  | 0 | 1 | 0 | 0 | 1 | 0 | AP  | 0.7481 | 2.6288 | 2.8649 | 2.9915 | 3.1832 | 3.3527 |
| DS-53198 | ii  | Left  | Primary    | Adenocarcinoma, NOS                                  | 0 | 1 | 0 | 0 | 1 | 0 | AP  | 0.5936 | 2.6935 | 2.8718 | 2.9840 | 3.1597 | 3.1537 |
| DS-53211 | iv  | Left  | Metastatic | Adenocarcinoma, NOS                                  | 0 | 0 | 1 | 0 | 1 | 0 | PK  | 0.4645 | 2.7279 | 2.9346 | 3.0084 | 2.5155 | 2.6615 |
| DS-53230 | iii | Left  | Primary    | Adenocarcinoma, NOS                                  | 0 | 0 | 0 | 0 | 1 | 1 | PB  | 0.3847 | 2.7873 | 2.9428 | 2.9548 | 2.8529 | 2.9901 |
| DS-53232 | ii  | Right | Primary    | Adenocarcinoma, NOS                                  | 1 | 0 | 0 | 0 | 1 | 1 | PB  | 0.3068 | 2.7872 | 2.9156 | 2.9821 | 1.7668 | 2.9022 |
| DS-53246 | ii  | Right | Primary    | Adenocarcinoma, NOS                                  | 0 | 1 | 0 | 0 | 1 | 0 | AP  | 0.5245 | 2.6315 | 2.9061 | 2.9669 | 3.0621 | 3.1898 |
| DS-53249 | ii  | Right | Primary    | Adenocarcinoma, NOS                                  | 0 | 1 | 1 | 0 | 1 | 0 | APK | 0.6083 | 2.7202 | 2.8968 | 3.0328 | 2.9521 | 3.1668 |
| DS-53272 | iv  | Left  | Metastatic | Adenocarcinoma, NOS                                  | 0 | 1 | 0 | 0 | 1 | 0 | AP  | 0.5539 | 2.6839 | 2.9954 | 3.0063 | 3.1616 | 3.3350 |
| DS-53295 | ii  | Right | Primary    | Adenocarcinoma, NOS                                  | 0 | 1 | 0 | 0 | 0 | 0 | A   | 0.5472 | 2.6893 | 2.9513 | 3.0462 | 2.1408 | 3.0715 |
| DS-53298 | ii  | Left  | Metastatic | Adenocarcinoma, NOS                                  | 0 | 1 | 0 | 0 | 1 | 0 | AP  | 0.5776 | 2.6787 | 3.0098 | 3.0444 | 3.2373 | 3.0729 |
| DS-53303 | i   |       | Metastatic | Adenocarcinoma, NOS                                  | 0 | 0 | 0 | 0 | 1 | 0 | P   | 0.6970 | 2.6658 | 2.9285 | 3.0665 | 3.2529 | 3.3522 |
| DS-53317 | iii | Right | Primary    | Adenocarcinoma, NOS                                  | 0 | 0 | 1 | 0 | 1 | 0 | PK  | 0.5453 | 2.7867 | 2.9342 | 3.0025 | 3.5240 | 3.5999 |
| DS-53324 | iv  | Right | Primary    | Adenocarcinoma, NOS                                  | 0 | 0 | 0 | 0 | 1 | 1 | PB  | 0.4574 | 2.8497 | 2.9278 | 3.0331 | 2.5189 | 3.0361 |
| DS-53359 | ii  | Right | Primary    | Adenocarcinoma, NOS                                  | 0 | 0 | 0 | 0 | 0 | 1 | B   | 0.3113 | 2.8810 | 2.8410 | 2.7247 | 2.0538 | 2.6867 |
| DS-53382 | ii  | Right | Primary    | Adenocarcinoma, NOS                                  | 1 | 0 | 0 | 0 | 1 | 1 | PB  | 0.3074 | 2.8329 | 2.9381 | 2.9399 | 2.5678 | 3.0729 |
| DS-53385 | iii | Right | Primary    | Adenocarcinoma, NOS                                  | 0 | 1 | 1 | 0 | 0 | 0 | AK  | 0.6475 | 2.9338 | 2.9847 | 3.1567 | 3.2916 | 3.4291 |
| DS-53408 | iv  | Right | Primary    | Adenocarcinoma, NOS                                  | 0 | 1 | 1 | 0 | 0 | 0 | AK  | 0.4328 | 2.8336 | 2.9868 | 2.9811 | 2.3462 | 3.2341 |
| DS-53424 | ii  | Right | Primary    | Adenocarcinoma, NOS                                  | 0 | 1 | 0 | 0 | 1 | 0 | AP  | 0.5468 | 2.7316 | 2.9477 | 3.0420 | 3.4481 | 3.5344 |
| DS-53453 | iv  | Left  | Metastatic | Adenocarcinoma, NOS                                  | 0 | 1 | 0 | 0 | 1 | 0 | AP  | 0.5070 | 2.7225 | 2.9222 | 2.9778 | 2.8133 | 3.1153 |
| DS-53460 | iii | Left  | Primary    | Adenocarcinoma, NOS                                  | 0 | 0 | 0 | 0 | 1 | 0 | P   | 0.5860 | 2.6238 | 2.8797 | 3.0255 | 2.6332 | 2.8982 |
| DS-53481 | ii  | Left  | Primary    | Adenocarcinoma, NOS                                  | 0 | 1 | 0 | 0 | 0 | 0 | A   | 0.5401 | 2.7160 | 2.8968 | 3.0120 | 3.2680 | 3.4103 |
| DS-53482 | iv  | Right | Primary    | Adenocarcinoma, Mucinous (Greater Than 50% Mucinous) | 0 | 1 | 1 | 0 | 1 | 0 | APK | 0.5916 | 2.7600 | 2.9181 | 3.0352 | 2.7371 | 3.1525 |
| DS-53487 | iii | Left  | Primary    | Adenocarcinoma, Mucinous (Greater Than 50% Mucinous) | 0 | 1 | 0 | 0 | 1 | 0 | AP  | 0.3401 | 2.7235 | 2.9378 | 2.9534 | 2.5017 | 3.0404 |
| DS-53489 | ii  | Right | Primary    | Adenocarcinoma, Mucinous (Greater Than 50% Mucinous) | 0 | 0 | 1 | 0 | 1 | 0 | PK  | 0.5034 | 2.8642 | 2.9627 | 3.0485 | 3.1191 | 3.3051 |
| DS-53494 | i   | Left  | Primary    | Adenocarcinoma, NOS                                  | 0 | 1 | 0 | 0 | 1 | 0 | AP  | 0.8573 | 2.6083 | 2.9310 | 3.1046 | 3.4353 | 3.2491 |
| DS-53505 | iii | Left  | Primary    | Adenocarcinoma, Mucinous (Greater Than 50% Mucinous) | 0 | 1 | 0 | 0 | 0 | 0 | A   | 0.3960 | 2.6902 | 2.8793 | 2.8979 | 2.3249 | 3.1355 |
| DS-53516 | iii | Left  | Primary    | Adenocarcinoma, NOS                                  | 0 | 0 | 0 | 0 | 1 | 0 | P   | 0.4210 | 2.8066 | 2.9335 | 2.8974 | 3.3327 | 3.3636 |
| DS-53528 | ii  | Left  | Primary    | Adenocarcinoma, NOS                                  | 0 | 0 | 0 | 0 | 1 | 0 | P   | 0.6822 | 2.5734 | 2.8885 | 3.0226 | 3.2876 | 3.4191 |
| DS-53644 | iii | Left  | Metastatic | Adenocarcinoma, NOS                                  | 0 | 1 | 1 | 0 | 1 | 0 | APK | 0.6581 | 2.7610 | 2.9686 | 3.1080 | 3.3757 | 3.3013 |
| DS-53661 | ii  | Left  | Primary    | Adenocarcinoma, NOS                                  | 0 | 1 | 1 | 0 | 1 | 0 | APK | 0.4679 | 2.7703 | 2.9743 | 3.0339 | 2.3339 | 3.1879 |
| DS-53664 | iv  | Left  | Primary    | Adenocarcinoma, NOS                                  | 0 | 1 | 1 | 0 | 1 | 0 | APK | 0.6294 | 2.6999 | 2.8977 | 3.0351 | 2.7008 | 2.8176 |
| DS-53679 | iv  | Right | Primary    | Adenocarcinoma, NOS                                  | 0 | 0 | 1 | 0 | 0 | 0 | K   | 0.4159 | 2.8694 | 2.9277 | 3.0010 | 1.4584 | 3.1854 |



|          |     |       |            |                                                      |   |   |   |   |   |   |     |        |        |        |        |        |        |
|----------|-----|-------|------------|------------------------------------------------------|---|---|---|---|---|---|-----|--------|--------|--------|--------|--------|--------|
| DS-53682 | ii  | Right | Primary    | Adenocarcinoma, NOS                                  | 0 | 0 | 0 | 0 | 1 | 0 | P   | 0.5551 | 2.7649 | 2.9041 | 3.0266 | 2.7316 | 2.9270 |
| DS-53687 | iii | Right | Primary    | Adenocarcinoma, NOS                                  | 1 | 0 | 0 | 0 | 0 | 0 | WT  | 0.3029 | 2.8069 | 2.8930 | 2.9346 | 2.0399 | 2.8534 |
| DS-53710 | i   | Right | Primary    | Adenocarcinoma, NOS                                  | 0 | 1 | 1 | 0 | 0 | 0 | AK  | 0.4203 | 2.7279 | 2.9310 | 3.0085 | 2.2380 | 3.1602 |
| DS-53725 | ii  | Left  | Primary    | Adenocarcinoma, NOS                                  | 0 | 1 | 0 | 0 | 0 | 0 | A   | 0.5599 | 2.6580 | 2.8951 | 2.9931 | 3.2639 | 3.4498 |
| DS-53728 | ii  | Left  | Primary    | Adenocarcinoma, NOS                                  | 0 | 1 | 0 | 0 | 0 | 0 | A   | 0.5645 | 2.6762 | 2.9604 | 3.0389 | 3.2872 | 3.4031 |
| DS-53730 | ii  | Right | Primary    | Adenocarcinoma, NOS                                  | 1 | 0 | 0 | 0 | 0 | 1 | B   | 0.3162 | 2.7592 | 2.8963 | 2.9951 | 1.4628 | 2.1897 |
| DS-53731 | i   | Left  | Primary    | Adenocarcinoma, NOS                                  | 1 | 0 | 0 | 0 | 1 | 1 | PB  | 0.2987 | 2.7386 | 2.9575 | 2.9361 | 2.7683 | 3.1495 |
| DS-53736 | ii  | Left  | Primary    | Adenocarcinoma, NOS                                  | 0 | 1 | 1 | 0 | 0 | 0 | AK  | 0.4934 | 2.7827 | 3.0315 | 3.1316 | 3.2507 | 3.4127 |
| DS-53750 | i   | Right | Primary    | Adenocarcinoma, NOS                                  | 0 | 0 | 0 | 0 | 0 | 0 | WT  | 0.2773 | 2.5901 | 2.8361 | 2.8350 | 2.8713 | 3.0728 |
| DS-53783 | iii | Right | Primary    | Adenocarcinoma, NOS                                  | 0 | 0 | 0 | 1 | 1 | 0 | PN  | 0.5562 | 2.8287 | 2.9430 | 2.9384 | 3.2502 | 3.2677 |
| DS-53800 | iii | Left  | Primary    | Adenocarcinoma, NOS                                  | 0 | 0 | 1 | 0 | 0 | 0 | K   | 0.3758 | 2.8351 | 2.8344 | 2.8574 | 2.7005 | 3.2533 |
| DS-53835 | iii | Right | Primary    | Adenocarcinoma, NOS                                  | 0 | 1 | 1 | 0 | 1 | 0 | APK | 0.6368 | 2.8797 | 2.9648 | 3.0028 | 3.3857 | 3.4524 |
| DS-53945 | ii  | Right | Primary    | Adenocarcinoma, NOS                                  | 1 | 0 | 0 | 0 | 0 | 1 | B   | 0.2752 | 2.8462 | 2.8956 | 2.8928 | 2.5379 | 3.2575 |
| DS-53957 | ii  | Left  | Primary    | Adenocarcinoma, NOS                                  | 0 | 0 | 0 | 0 | 1 | 0 | P   | 0.7398 | 2.6580 | 2.9409 | 3.0577 | 2.9822 | 3.1827 |
| DS-53969 | iii | Left  | Primary    | Adenocarcinoma, NOS                                  | 0 | 1 | 0 | 1 | 1 | 0 | APN | 0.7372 | 2.7711 | 2.9165 | 3.1184 | 3.4374 | 3.5152 |
| DS-53972 | i   | Right | Primary    | Adenocarcinoma, NOS                                  | 1 | 1 | 0 | 0 | 0 | 1 | AB  | 0.3645 | 2.8497 | 2.8581 | 2.8780 | 1.5326 | 2.6579 |
| DS-54009 | iv  | Left  | Metastatic | Adenocarcinoma, NOS                                  | 0 | 1 | 0 | 0 | 0 | 0 | A   | 0.5518 | 2.7650 | 3.0228 | 3.0560 | 2.4005 | 3.0227 |
| DS-54013 | iii | Left  | Primary    | Adenocarcinoma, NOS                                  | 0 | 1 | 0 | 0 | 1 | 0 | AP  | 0.5986 | 2.7180 | 2.9359 | 3.0271 | 3.2418 | 3.4005 |
| DS-54015 | ii  | Left  | Primary    | Adenocarcinoma, NOS                                  | 0 | 1 | 0 | 0 | 0 | 0 | A   | 0.3784 | 2.7062 | 2.9348 | 2.9979 | 1.3732 | 2.9973 |
| DS-54031 | iii | Left  | Primary    | Adenocarcinoma, NOS                                  | 0 | 0 | 0 | 0 | 1 | 0 | P   | 0.6888 | 2.7080 | 2.9432 | 3.0111 | 2.9543 | 3.1216 |
| DS-54041 | iv  | Left  | Metastatic | Adenocarcinoma, NOS                                  | 0 | 1 | 1 | 0 | 0 | 0 | AK  | 0.5303 | 2.8822 | 2.9876 | 3.0646 | 3.3273 | 3.4827 |
| DS-54043 | iv  | Left  | Primary    | Adenocarcinoma, NOS                                  | 0 | 0 | 1 | 0 | 1 | 0 | PK  | 0.3851 | 2.7863 | 2.9900 | 3.0219 | 3.1767 | 3.3217 |
| DS-54051 | iv  | Left  | Primary    | Adenocarcinoma, NOS                                  | 0 | 0 | 1 | 0 | 0 | 0 | K   | 0.4849 | 2.7964 | 2.9535 | 3.0092 | 2.9744 | 3.2959 |
| DS-54054 | ii  | Left  | Primary    | Adenocarcinoma, NOS                                  | 0 | 0 | 0 | 0 | 1 | 0 | P   | 0.5251 | 2.7030 | 2.9624 | 3.0379 | 3.0903 | 3.3260 |
| DS-54062 | i   | Left  | Primary    | Adenocarcinoma, NOS                                  | 0 | 1 | 0 | 0 | 1 | 0 | AP  | 0.6874 | 2.6994 | 2.9505 | 3.0368 | 3.2934 | 3.3432 |
| DS-54072 | iv  | Left  | Primary    | Adenocarcinoma, NOS                                  | 0 | 1 | 0 | 0 | 1 | 0 | AP  | 0.5984 | 2.7020 | 2.9910 | 3.0688 | 0.6317 | 3.4157 |
| DS-54089 | ii  | Left  | Primary    | Adenocarcinoma, NOS                                  | 0 | 1 | 1 | 0 | 0 | 0 | AK  | 0.4784 | 2.7676 | 2.9371 | 3.0991 | 2.9039 | 3.2312 |
| DS-54129 | iii | Left  | Primary    | Adenocarcinoma, NOS                                  | 0 | 1 | 1 | 0 | 0 | 0 | AK  | 0.5574 | 2.7453 | 2.9399 | 3.0191 | 2.9640 | 3.1573 |
| DS-54148 | ii  | Left  | Primary    | Adenocarcinoma, NOS                                  | 0 | 1 | 1 | 0 | 0 | 0 | AK  | 0.4912 | 2.7995 | 2.9959 | 3.0790 | 2.9647 | 3.2697 |
| DS-54160 | iii | Left  | Primary    | Adenocarcinoma, NOS                                  | 1 | 1 | 0 | 0 | 0 | 0 | A   | 0.3348 | 2.8353 | 2.9924 | 2.9956 | 3.4466 | 3.4889 |
| DS-54189 |     | Left  | Primary    | Adenocarcinoma, NOS                                  | 0 | 0 | 0 | 0 | 1 | 0 | P   | 0.3862 | 2.4822 | 2.7718 | 2.7254 | 1.0512 | 1.6855 |
| DS-54195 | i   | Left  | Primary    | Adenocarcinoma, NOS                                  | 0 | 1 | 1 | 0 | 1 | 0 | APK | 0.5411 | 2.7297 | 2.9769 | 3.1085 | 2.9940 | 3.3042 |
| DS-54223 | iii | Right | Primary    | Adenocarcinoma, NOS                                  | 0 | 0 | 0 | 0 | 1 | 0 | P   | 0.5212 | 2.7527 | 2.9583 | 3.0599 | 3.2308 | 3.4254 |
| DS-54255 | iv  | Right | Primary    | Adenocarcinoma, NOS                                  | 0 | 1 | 0 | 0 | 1 | 0 | AP  | 0.5398 | 2.8255 | 2.9594 | 3.1002 | 3.2656 | 3.4214 |
| DS-54289 | iv  | Left  | Metastatic | Adenocarcinoma, NOS                                  | 0 | 0 | 0 | 0 | 0 | 0 | WT  | 0.3157 | 2.8373 | 2.9190 | 2.8116 | 3.1662 | 3.3805 |
| DS-54307 | ii  | Left  | Primary    | Adenocarcinoma, NOS                                  | 0 | 1 | 1 | 0 | 0 | 0 | AK  | 0.3357 | 2.9470 | 2.9974 | 3.0920 | 2.4493 | 3.2863 |
| DS-54327 | ii  | Left  | Primary    | Adenocarcinoma, NOS                                  | 0 | 1 | 1 | 0 | 0 | 0 | AK  | 0.5527 | 2.7522 | 2.8734 | 3.0789 | 3.2711 | 3.3613 |
| DS-54355 | iii | Left  | Primary    | Adenocarcinoma, NOS                                  | 0 | 1 | 1 | 0 | 1 | 0 | APK | 0.4996 | 2.8184 | 2.9821 | 3.0368 | 1.6358 | 2.8535 |
| DS-54362 | iii | Left  | Primary    | Adenocarcinoma, NOS                                  | 0 | 0 | 1 | 0 | 1 | 0 | PK  | 0.5149 | 2.6805 | 2.9178 | 3.0011 | 2.6428 | 3.1507 |
| DS-54363 | ii  | Right | Primary    | Adenocarcinoma, NOS                                  | 0 | 1 | 1 | 0 | 0 | 0 | AK  | 0.3937 | 2.7383 | 2.9467 | 3.0188 | 3.2212 | 3.3377 |
| DS-54391 | iii | Left  | Primary    | Adenocarcinoma, NOS                                  | 0 | 1 | 0 | 0 | 1 | 0 | AP  | 0.5115 | 2.7193 | 2.9284 | 3.0325 | 3.2756 | 3.3895 |
| DS-54393 | iv  | Left  | Primary    | Adenocarcinoma, NOS                                  | 0 | 1 | 1 | 0 | 1 | 0 | APK | 0.6376 | 2.7694 | 2.9424 | 3.0971 | 3.0168 | 3.1911 |
| DS-54405 | ii  | Left  | Primary    | Adenocarcinoma, NOS                                  | 0 | 0 | 0 | 0 | 0 | 0 | WT  | 0.3892 | 2.7897 | 2.9679 | 3.0611 | 2.9828 | 3.3293 |
| DS-54437 | iii | Right | Primary    | Adenocarcinoma, Mucinous (Greater Than 50% Mucinous) | 0 | 1 | 0 | 0 | 1 | 1 | APB | 0.4371 | 2.7735 | 3.0406 | 3.0325 | 3.2708 | 3.2808 |
| DS-54439 | iv  | Left  | Primary    | Adenocarcinoma, NOS                                  | 0 | 1 | 1 | 0 | 1 | 0 | APK | 0.5396 | 2.7995 | 2.9671 | 3.0217 | 3.1914 | 3.2120 |
| DS-54452 | iv  | Left  | Primary    | Adenocarcinoma, NOS                                  | 0 | 1 | 0 | 0 | 1 | 0 | AP  | 0.8305 | 2.6090 | 2.9229 | 3.0816 | 3.4196 | 3.4305 |
| DS-54503 | ii  | Left  | Primary    | Adenocarcinoma, NOS                                  | 0 | 1 | 0 | 0 | 1 | 0 | AP  | 0.7347 | 2.6505 | 2.9397 | 3.0652 | 3.3395 | 3.5040 |
| DS-54552 | ii  | Left  | Primary    | Adenocarcinoma, NOS                                  | 0 | 1 | 0 | 0 | 0 | 0 | A   | 0.6111 | 2.6738 | 2.9590 | 3.0463 | 3.1819 | 3.1391 |

|          |     |       |            |                                                      |   |   |   |   |   |   |     |        |        |        |        |        |        |
|----------|-----|-------|------------|------------------------------------------------------|---|---|---|---|---|---|-----|--------|--------|--------|--------|--------|--------|
| DS-54556 | iii | Left  | Primary    | Adenocarcinoma, NOS                                  | 0 | 1 | 0 | 0 | 1 | 0 | AP  | 0.5706 | 2.6720 | 2.9412 | 3.0411 | 3.1129 | 3.3448 |
| DS-54564 | iii | Left  | Metastatic | Adenocarcinoma, NOS                                  | 0 | 0 | 0 | 0 | 1 | 0 | P   | 0.4545 | 2.7728 | 2.9603 | 2.9546 | 3.2664 | 3.4375 |
| DS-54569 | ii  | Right | Primary    | Adenocarcinoma, NOS                                  | 0 | 1 | 0 | 0 | 1 | 0 | AP  | 0.5881 | 2.6858 | 2.9699 | 3.0456 | 3.1369 | 3.2887 |
| DS-54589 | iv  | Left  | Metastatic | Adenocarcinoma, NOS                                  | 0 | 1 | 0 | 0 | 1 | 0 | AP  | 0.7307 | 2.7038 | 2.9400 | 3.0557 | 3.2494 | 3.3589 |
| DS-54674 | iii | Right | Primary    | Adenocarcinoma, Mucinous (Greater Than 50% Mucinous) | 0 | 1 | 0 | 0 | 0 | 0 | A   | 0.4277 | 2.7160 | 2.9686 | 3.1017 | 3.1733 | 3.3045 |
| DS-54679 | iii | Right | Primary    | Adenocarcinoma, NOS                                  | 0 | 1 | 1 | 0 | 1 | 0 | APK | 0.5597 | 2.8361 | 2.9847 | 3.1074 | 3.0166 | 3.0894 |
| DS-54697 | i   | Left  | Primary    | Adenocarcinoma, NOS                                  | 0 | 1 | 0 | 0 | 1 | 0 | AP  | 0.5412 | 2.6111 | 2.9908 | 3.0449 | 3.0123 | 3.1686 |
| DS-54724 | iii | Left  | Primary    | Adenocarcinoma, NOS                                  | 0 | 1 | 0 | 0 | 1 | 0 | AP  | 0.6363 | 2.7383 | 2.9590 | 3.0366 | 3.1894 | 3.2238 |
| DS-54730 | iii | Right | Primary    | Adenocarcinoma, NOS                                  | 0 | 0 | 0 | 0 | 1 | 0 | P   | 0.4275 | 2.5894 | 2.8938 | 2.9455 | 2.3973 | 2.8997 |
| DS-54737 | iii | Right | Primary    | Adenocarcinoma, NOS                                  | 0 | 1 | 1 | 0 | 1 | 0 | APK | 0.4700 | 2.8540 | 3.0178 | 3.0203 | 3.0110 | 3.0996 |
| DS-54750 | ii  | Right | Primary    | Adenocarcinoma, NOS                                  | 1 | 0 | 0 | 0 | 1 | 1 | PB  | 0.3373 | 2.7884 | 2.9014 | 3.0585 | 2.0287 | 2.7445 |
| DS-54751 | i   | Left  | Primary    | Adenocarcinoma, NOS                                  | 0 | 1 | 1 | 0 | 0 | 0 | AK  | 0.5365 | 2.7291 | 2.9426 | 3.0392 | 3.1431 | 3.3100 |
| DS-54758 | ii  | Right | Primary    | Adenocarcinoma, NOS                                  | 1 | 1 | 1 | 0 | 0 | 0 | AK  | 0.3321 | 2.7383 | 2.9315 | 2.9995 | 1.8512 | 3.0677 |
| DS-54782 | iii | Left  | Primary    | Adenocarcinoma, NOS                                  | 0 | 1 | 1 | 0 | 1 | 0 | APK | 0.4241 | 2.7227 | 2.9468 | 3.0370 | 2.8697 | 3.2555 |
| DS-54783 | iii | Left  | Primary    | Adenocarcinoma, NOS                                  | 0 | 0 | 0 | 0 | 1 | 0 | P   | 0.6239 | 2.6946 | 2.9668 | 3.0354 | 3.2190 | 3.3828 |
| DS-54833 | i   | Left  | Primary    | Adenocarcinoma, NOS                                  | 0 | 0 | 1 | 0 | 0 | 0 | K   | 0.4018 | 2.8258 | 2.9765 | 3.0674 | 2.8769 | 3.2230 |
| DS-54841 | iii | Left  | Metastatic | Adenocarcinoma, NOS                                  | 0 | 1 | 1 | 0 | 1 | 0 | APK | 0.5960 | 2.8821 | 3.0299 | 3.0664 | 3.1713 | 3.4074 |
| DS-54845 | iv  | Left  | Primary    | Adenocarcinoma, NOS                                  | 0 | 1 | 1 | 0 | 1 | 0 | APK | 0.6867 | 2.7639 | 2.9366 | 3.0843 | 3.1279 | 3.1472 |
| DS-54925 | iii | Right | Primary    | Adenocarcinoma, NOS                                  | 0 | 1 | 1 | 0 | 1 | 0 | APK | 0.5808 | 2.7711 | 2.9478 | 2.9663 | 3.1966 | 3.2962 |
| DS-54926 | i   | Right | Primary    | Adenocarcinoma, NOS                                  | 0 | 0 | 0 | 0 | 1 | 0 | P   | 0.4962 | 2.6732 | 2.9735 | 3.0032 | 3.1183 | 3.3798 |
| DS-54928 | iv  | Right | Primary    | Adenocarcinoma, NOS                                  | 0 | 1 | 0 | 0 | 1 | 0 | AP  | 0.6336 | 2.7032 | 2.9312 | 3.0789 | 2.9144 | 3.0079 |
| DS-55003 | ii  | Left  | Primary    | Adenocarcinoma, NOS                                  | 1 | 1 | 1 | 0 | 0 | 0 | AK  | 0.4052 | 2.7946 | 2.9149 | 2.8479 | 2.8848 | 3.3243 |
| DS-55324 | iv  | Right | Primary    | Adenocarcinoma, NOS                                  | 0 | 1 | 1 | 0 | 1 | 0 | APK | 0.5583 | 2.7748 | 2.9675 | 3.0379 | 3.1282 | 3.3825 |
| DS-55343 | ii  | Left  | Primary    | Adenocarcinoma, NOS                                  | 0 | 0 | 1 | 0 | 0 | 0 | K   | 0.5555 | 2.7803 | 2.9465 | 3.1060 | 3.2358 | 3.3568 |
| DS-55355 | iii | Right | Primary    | Adenocarcinoma, NOS                                  | 0 | 1 | 1 | 0 | 0 | 0 | AK  | 0.5595 | 2.8365 | 2.9943 | 3.1539 | 2.6903 | 3.2503 |
| DS-55364 | ii  | Left  | Primary    | Adenocarcinoma With Focal Mucinous Features          | 0 | 1 | 1 | 0 | 0 | 0 | AK  | 0.5363 | 2.8541 | 3.0105 | 3.1819 | 2.3676 | 2.9500 |
| DS-55377 | iv  | Right | Primary    | Adenocarcinoma, NOS                                  | 0 | 1 | 1 | 0 | 1 | 0 | APK | 0.5448 | 2.7958 | 2.9300 | 3.0602 | 3.2761 | 3.4382 |
| DS-55379 | iv  | Left  | Primary    | Adenocarcinoma, NOS                                  | 0 | 1 | 1 | 0 | 1 | 0 | APK | 0.5321 | 2.7828 | 3.0008 | 3.0177 | 3.0225 | 3.1700 |
| DS-55383 | iii | Left  | Metastatic | Adenocarcinoma, NOS                                  | 0 | 1 | 1 | 0 | 0 | 0 | AK  | 0.4300 | 2.7830 | 2.9728 | 3.0246 | 2.4653 | 2.9507 |
| DS-55384 | iii | Left  | Primary    | Adenocarcinoma, NOS                                  | 0 | 1 | 0 | 0 | 1 | 0 | AP  | 0.6804 | 2.7926 | 2.9118 | 3.0861 | 3.2077 | 3.4489 |
| DS-55388 | i   | Right | Primary    | Adenocarcinoma, NOS                                  | 0 | 1 | 0 | 0 | 1 | 0 | AP  | 0.4639 | 2.6783 | 2.8460 | 2.9652 | 3.1507 | 3.1340 |
| DS-55390 | ii  | Right | Primary    | Adenocarcinoma, NOS                                  | 1 | 0 | 0 | 0 | 0 | 1 | B   | 0.3499 | 2.8234 | 2.8656 | 2.9221 | 2.0305 | 3.1009 |
| DS-55398 | i   | Right | Primary    | Adenocarcinoma, NOS                                  | 0 | 0 | 0 | 0 | 1 | 0 | P   | 0.5874 | 2.6906 | 2.8691 | 2.9721 | 2.2999 | 3.1198 |
| DS-55407 | i   | Right | Primary    | Adenocarcinoma, NOS                                  | 0 | 1 | 1 | 0 | 1 | 0 | APK | 0.4536 | 2.7300 | 2.8767 | 2.9573 | 1.4306 | 2.9890 |
| DS-55411 | ii  | Left  | Primary    | Adenocarcinoma, NOS                                  | 0 | 0 | 0 | 0 | 0 | 0 | WT  | 0.7478 | 2.6966 | 2.9788 | 3.0409 | 3.2288 | 3.3472 |
| DS-56069 | iv  | Left  | Metastatic | Adenocarcinoma, Mucinous                             | 0 | 0 | 0 | 0 | 1 | 1 | PB  | 0.4815 | 2.7624 | 2.9721 | 3.0177 | 3.0979 | 3.3694 |
| DS-56080 | iv  | Left  | Metastatic | Adenocarcinoma, NOS                                  | 0 | 1 | 0 | 0 | 0 | 0 | A   | 0.6163 | 2.7047 | 2.9554 | 3.0979 | 3.3936 | 3.4951 |
| DS-56094 | i   | Left  | Primary    | Adenocarcinoma, NOS                                  | 0 | 1 | 0 | 0 | 0 | 0 | A   | 0.6213 | 2.6524 | 2.9478 | 3.0415 | 1.8800 | 2.8878 |
| DS-56101 | iii | Left  | Primary    | Adenocarcinoma, NOS                                  | 0 | 1 | 0 | 0 | 1 | 0 | AP  | 0.5322 | 2.7490 | 2.9951 | 3.0947 | 3.3863 | 3.4782 |
| DS-56118 | i   | Left  | Primary    | Adenocarcinoma, Mucinous (Greater Than 50% Mucinous) | 0 | 1 | 1 | 0 | 0 | 0 | AK  | 0.5458 | 2.8019 | 3.0017 | 3.1666 | 3.2085 | 3.2908 |
| DS-56140 | ii  | Left  | Metastatic | Adenocarcinoma, NOS                                  | 0 | 1 | 0 | 0 | 0 | 0 | A   | 0.6828 | 2.6451 | 2.9581 | 3.0685 | 3.3676 | 3.4396 |
| DS-56142 | ii  | Right | Primary    | Adenocarcinoma, NOS                                  | 0 | 0 | 1 | 0 | 1 | 0 | PK  | 0.4946 | 2.7025 | 3.0036 | 2.9634 | 2.9365 | 3.2108 |
| DS-56176 | ii  | Left  | Primary    | Adenocarcinoma, NOS                                  | 0 | 1 | 0 | 0 | 1 | 0 | AP  | 0.5758 | 2.6587 | 2.9116 | 2.9734 | 3.4270 | 3.3587 |
| DS-56293 | ii  | Left  | Primary    | Adenocarcinoma, NOS                                  | 0 | 1 | 0 | 0 | 1 | 0 | AP  | 0.7571 | 2.6280 | 2.8983 | 3.0466 | 3.2744 | 3.3695 |
| DS-56302 | i   | Left  | Primary    | Adenocarcinoma, NOS                                  | 0 | 1 | 1 | 0 | 1 | 0 | APK | 0.4942 | 2.7529 | 3.0188 | 3.0802 | 3.1949 | 3.4257 |
| DS-56309 | iii | Left  | Metastatic | Adenocarcinoma, NOS                                  | 0 | 1 | 1 | 0 | 1 | 0 | APK | 0.6145 | 2.8004 | 2.9964 | 3.1413 | 3.2408 | 3.3913 |
| DS-56310 | iv  | Left  | Primary    | Adenocarcinoma, NOS                                  | 0 | 1 | 0 | 0 | 1 | 0 | AP  | 0.6751 | 2.8118 | 2.9674 | 3.0755 | 2.9127 | 3.1394 |

|          |     |       |            |                                                      |   |   |   |   |   |   |     |        |        |        |        |        |        |
|----------|-----|-------|------------|------------------------------------------------------|---|---|---|---|---|---|-----|--------|--------|--------|--------|--------|--------|
| DS-56326 | ii  | Right | Primary    | Adenocarcinoma, Mucinous                             | 1 | 0 | 0 | 0 | 0 | 1 | B   | 0.2821 | 2.8206 | 2.8668 | 2.9051 | 1.5213 | 2.9149 |
| DS-56330 | iv  | Left  | Primary    | Adenocarcinoma, NOS                                  | 0 | 0 | 0 | 0 | 0 | 0 | WT  | 0.3780 | 2.7062 | 2.8973 | 2.7384 | 3.0890 | 3.1464 |
| DS-56334 | ii  | Left  | Primary    | Adenocarcinoma, Mucinous (Greater Than 50% Mucinous) | 0 | 0 | 0 | 0 | 0 | 0 | WT  | 0.3181 | 2.7027 | 2.8921 | 2.8803 | 2.6466 | 3.2083 |
| DS-56348 | iii | Left  | Metastatic | Adenocarcinoma, NOS                                  | 0 | 1 | 0 | 0 | 1 | 0 | AP  | 0.6740 | 2.6456 | 2.8591 | 2.9592 | 3.2453 | 3.2936 |
| DS-56351 | i   | Right | Primary    | Adenocarcinoma, NOS                                  | 1 | 0 | 0 | 0 | 0 | 0 | WT  | 0.3367 | 2.8502 | 2.8948 | 2.9509 | 1.2308 | 2.6620 |
| DS-56376 | iv  | Left  | Metastatic | Adenocarcinoma, NOS                                  | 0 | 1 | 0 | 0 | 1 | 0 | AP  | 0.5837 | 2.8035 | 2.9947 | 2.9984 | 3.4506 | 3.4789 |
| DS-56384 | iii | Left  | Primary    | Adenocarcinoma, NOS                                  | 0 | 1 | 1 | 0 | 0 | 0 | AK  | 0.3672 | 2.8189 | 2.9710 | 3.0485 | 2.1823 | 2.9288 |
| DS-56397 | iv  | Right | Metastatic | Adenocarcinoma, NOS                                  | 0 | 1 | 1 | 0 | 1 | 0 | APK | 0.5220 | 2.7238 | 2.9641 | 3.0574 | 2.8144 | 2.9150 |
| DS-56421 | i   | Left  | Metastatic | Adenocarcinoma, NOS                                  | 0 | 1 | 1 | 0 | 1 | 0 | APK | 0.6211 | 2.7663 | 2.9803 | 3.0731 | 3.3137 | 3.3980 |
| DS-56551 | iv  | Right | Metastatic | Adenocarcinoma, Mucinous                             | 0 | 0 | 0 | 0 | 0 | 0 | WT  | 0.3039 | 2.7192 | 2.8651 | 2.7584 | 2.4967 | 2.8150 |
| DS-56604 | iii | Left  | Primary    | Adenocarcinoma, NOS                                  | 0 | 0 | 0 | 0 | 0 | 0 | WT  | 0.2946 | 2.7001 | 2.9052 | 2.8302 | 2.5572 | 3.1464 |
| DS-56608 | iii | Right | Primary    | Adenocarcinoma, NOS                                  | 0 | 1 | 1 | 0 | 1 | 0 | APK | 0.5378 | 2.8346 | 2.8778 | 3.0375 | 3.3243 | 3.3974 |
| DS-56626 | iv  | Left  | Primary    | Adenocarcinoma, NOS                                  | 0 | 1 | 0 | 0 | 1 | 0 | AP  | 0.6227 | 2.6846 | 2.9099 | 3.0210 | 2.9276 | 3.2692 |
| DS-56635 | iii | Left  | Primary    | Adenocarcinoma, NOS                                  | 0 | 0 | 0 | 0 | 1 | 0 | P   | 0.3107 | 2.7718 | 2.9833 | 2.8418 | 2.9123 | 3.1994 |
| DS-56647 | i   | Left  | Primary    | Adenocarcinoma, NOS                                  | 0 | 1 | 0 | 0 | 1 | 0 | AP  | 0.8021 | 2.6942 | 2.8524 | 3.0086 | 3.3867 | 3.4915 |
| DS-56660 | iv  | Right | Primary    | Adenocarcinoma, NOS                                  | 0 | 1 | 1 | 0 | 0 | 0 | AK  | 0.3295 | 2.8081 | 2.9707 | 3.0542 | 2.3156 | 3.2690 |
| DS-56668 | ii  | Left  | Primary    | Adenocarcinoma, NOS                                  | 0 | 1 | 0 | 0 | 1 | 0 | AP  | 0.6679 | 2.6065 | 2.9501 | 3.0513 | 3.2868 | 3.3099 |
| DS-56678 | iii | Left  | Primary    | Adenocarcinoma, NOS                                  | 0 | 1 | 0 | 0 | 1 | 0 | AP  | 0.6026 | 2.6757 | 2.8963 | 2.9897 | 3.2315 | 3.2682 |
| DS-56683 | iv  | Left  | Primary    | Adenocarcinoma, NOS                                  | 0 | 1 | 1 | 0 | 0 | 0 | AK  | 0.3130 | 2.7734 | 2.9711 | 2.9347 | 3.0741 | 3.2584 |
| DS-56740 | iii | Left  | Metastatic | Adenocarcinoma, Mucinous                             | 0 | 1 | 1 | 0 | 0 | 0 | AK  | 0.3923 | 2.7912 | 2.9662 | 3.0052 | 2.2369 | 3.1738 |
| DS-56796 | iii | Left  | Primary    | Adenocarcinoma, NOS                                  | 0 | 0 | 0 | 0 | 1 | 0 | P   | 0.4308 | 2.6928 | 2.9328 | 2.9493 | 3.1176 | 3.3762 |
| DS-56803 | iii | Left  | Primary    | Adenocarcinoma, NOS                                  | 0 | 1 | 0 | 0 | 1 | 0 | AP  | 0.4996 | 2.6778 | 3.0098 | 3.0910 | 3.3336 | 3.4196 |
| DS-56820 | ii  | Right | Primary    | Adenocarcinoma With Focal Mucinous Features          | 1 | 0 | 1 | 0 | 0 | 0 | K   | 0.2682 | 2.8611 | 2.9121 | 2.9208 | 2.4857 | 3.1178 |
| DS-56829 | 0   | Right | Primary    | Adenocarcinoma, NOS                                  | 0 | 1 | 1 | 0 | 1 | 0 | APK | 0.4697 | 2.7187 | 2.9435 | 3.0959 | 2.6451 | 3.1314 |
| DS-56830 | iii | Left  | Primary    | Adenocarcinoma, NOS                                  | 0 | 1 | 0 | 1 | 0 | 0 | AN  | 0.4932 | 2.7838 | 2.9512 | 3.1015 | 3.2684 | 3.4092 |
| DS-56842 | i   | Left  | Primary    | Adenocarcinoma, NOS                                  | 0 | 1 | 0 | 0 | 0 | 0 | A   | 0.4712 | 2.6311 | 2.9489 | 2.9969 | 3.0896 | 3.3382 |
| DS-56858 | iii | Left  | Metastatic | Adenocarcinoma, NOS                                  | 0 | 1 | 1 | 0 | 1 | 0 | APK | 0.6341 | 2.7538 | 2.9507 | 3.0337 | 3.0463 | 3.3040 |
| DS-56867 | ii  | Right | Primary    | Adenocarcinoma, NOS                                  | 0 | 1 | 0 | 0 | 1 | 0 | AP  | 0.6536 | 2.6847 | 2.9080 | 3.0241 | 3.2594 | 3.3410 |
| DS-56888 | i   | Right | Primary    | Adenocarcinoma, NOS                                  | 1 | 0 | 0 | 0 | 1 | 1 | PB  | 0.3664 | 2.8174 | 2.9307 | 2.9922 | 2.6506 | 3.2610 |
| DS-56894 | i   | Left  | Metastatic | Adenocarcinoma, NOS                                  | 0 | 1 | 0 | 0 | 1 | 1 | APB | 0.5026 | 2.9285 | 2.9587 | 2.9251 | 3.2503 | 3.3407 |
| DS-56949 | i   | Left  | Primary    | Adenocarcinoma, NOS                                  | 0 | 1 | 0 | 0 | 0 | 0 | A   | 0.5474 | 2.6985 | 2.9189 | 3.0156 | 3.2079 | 3.3576 |
| DS-56962 | iv  |       | Metastatic | Adenocarcinoma, NOS                                  | 0 | 1 | 0 | 0 | 1 | 0 | AP  | 0.7170 | 2.6956 | 3.0123 | 3.1468 | 3.4338 | 3.4642 |
| DS-56963 | iv  | Right | Metastatic | Adenocarcinoma, NOS                                  | 0 | 1 | 1 | 0 | 0 | 0 | AK  | 0.4308 | 2.8464 | 2.9883 | 3.0102 | 2.7069 | 3.2092 |
| DS-56964 | iii | Right | Primary    | Adenocarcinoma, NOS                                  | 0 | 1 | 1 | 0 | 0 | 0 | AK  | 0.3981 | 2.8388 | 2.9499 | 3.0095 | 2.1303 | 3.1476 |
| DS-56979 | iv  | Left  | Metastatic | Adenocarcinoma, NOS                                  | 0 | 0 | 0 | 0 | 1 | 0 | P   | 0.7019 | 2.6659 | 2.8486 | 2.9660 | 3.3707 | 3.4056 |
| DS-56998 | iii | Left  | Primary    | Adenocarcinoma, NOS                                  | 0 | 1 | 1 | 0 | 1 | 0 | APK | 0.4923 | 2.7982 | 2.9856 | 3.0711 | 3.2699 | 3.4865 |
| DS-57006 | i   | Left  | Primary    | Adenocarcinoma, NOS                                  | 0 | 1 | 0 | 0 | 0 | 0 | A   | 0.7338 | 2.6135 | 2.9148 | 3.0912 | 2.8715 | 3.2566 |
| DS-57008 | i   | Right | Primary    | Adenocarcinoma, NOS                                  | 0 | 1 | 1 | 0 | 1 | 0 | APK | 0.6728 | 2.7809 | 2.9739 | 3.1160 | 3.0508 | 3.2877 |
| DS-57013 | i   | Right | Primary    | Adenocarcinoma, NOS                                  | 0 | 1 | 0 | 0 | 1 | 0 | AP  | 0.5870 | 2.6943 | 2.9592 | 3.0693 | 3.3270 | 3.4539 |
| DS-57026 | ii  | Left  | Primary    | Adenocarcinoma, NOS                                  | 0 | 1 | 0 | 0 | 1 | 0 | AP  | 0.5712 | 2.7209 | 3.0029 | 3.1344 | 3.3987 | 3.4948 |
| DS-57035 | i   | Right | Primary    | Adenocarcinoma, NOS                                  | 0 | 1 | 1 | 0 | 1 | 0 | APK | 0.6438 | 2.7292 | 2.9362 | 3.0350 | 3.3405 | 3.3628 |
| DS-57041 | i   | Right | Primary    | Adenocarcinoma, NOS                                  | 0 | 1 | 1 | 0 | 0 | 0 | AK  | 0.4192 | 2.6782 | 2.9341 | 3.0577 | 2.5813 | 2.9436 |
| DS-57046 | iii | Right | Primary    | Adenocarcinoma, NOS                                  | 0 | 0 | 0 | 0 | 1 | 0 | P   | 0.5179 | 2.7087 | 3.0039 | 3.0975 | 3.1570 | 3.3468 |
| DS-57048 | ii  | Right | Primary    | Adenocarcinoma, NOS                                  | 0 | 0 | 0 | 0 | 1 | 0 | P   | 0.7465 | 2.6496 | 2.8821 | 3.0180 | 3.2570 | 3.3939 |
| DS-57052 | iii | Right | Primary    | Adenocarcinoma, NOS                                  | 0 | 0 | 0 | 0 | 0 | 0 | WT  | 0.3805 | 2.5186 | 2.8785 | 2.9103 | 2.5815 | 3.2170 |
| DS-57055 | iv  | Right | Primary    | Adenocarcinoma, NOS                                  | 0 | 0 | 1 | 0 | 0 | 0 | K   | 0.4846 | 2.7501 | 2.9959 | 3.0064 | 3.0121 | 3.1405 |
| DS-57060 | iii | Left  | Primary    | Adenocarcinoma, NOS                                  | 0 | 1 | 0 | 0 | 1 | 0 | AP  | 0.6764 | 2.6869 | 2.9603 | 3.0060 | 3.1251 | 3.2870 |
| DS-57433 | iv  | Left  | Primary    | Adenocarcinoma, NOS                                  | 0 | 0 | 1 | 0 | 1 | 0 | PK  | 0.4123 | 2.6189 | 2.8924 | 2.7536 | 2.5551 | 2.9675 |

|          |     |       |            |                                                                 |   |   |   |   |   |   |     |        |        |        |        |        |        |
|----------|-----|-------|------------|-----------------------------------------------------------------|---|---|---|---|---|---|-----|--------|--------|--------|--------|--------|--------|
| DS-57472 | iii | Left  | Primary    | Adenocarcinoma, NOS                                             | 0 | 0 | 1 | 0 | 1 | 0 | PK  | 0.4867 | 2.7747 | 2.9719 | 3.0321 | 3.1338 | 3.2177 |
| DS-57616 | ii  | Left  | Primary    | Adenocarcinoma, Mucinous (Greater Than 50% Mucinous)            | 0 | 0 | 0 | 0 | 1 | 1 | PB  | 0.4084 | 2.7897 | 2.9748 | 2.9446 | 2.9737 | 3.2263 |
| DS-57686 | iii | Left  | Primary    | Adenocarcinoma, NOS                                             | 0 | 1 | 1 | 0 | 1 | 0 | APK | 0.6155 | 2.7538 | 2.9600 | 3.0538 | 3.3390 | 3.3573 |
| DS-57829 | iv  |       | Metastatic | Adenocarcinoma, NOS                                             | 0 | 1 | 1 | 0 | 1 | 0 | APK | 0.5884 | 2.8513 | 2.9150 | 3.1188 | 1.6591 | 2.7668 |
| DS-57927 | iv  | Left  | Metastatic | Adenocarcinoma, NOS                                             | 0 | 1 | 1 | 0 | 0 | 0 | AK  | 0.4824 | 2.7586 | 2.9590 | 2.9991 | 3.1315 | 3.2015 |
| DS-57955 | ii  | Left  | Primary    | Adenocarcinoma, NOS                                             | 0 | 1 | 0 | 0 | 1 | 0 | AP  | 0.6411 | 2.6789 | 2.9517 | 3.1126 | 2.9869 | 3.3493 |
| DS-58141 | ii  | Left  | Metastatic | Adenocarcinoma, NOS                                             | 0 | 1 | 0 | 0 | 1 | 0 | AP  | 0.6183 | 2.8241 | 2.9987 | 3.0351 | 2.9177 | 3.1569 |
| DS-58234 | iv  | Right | Primary    | Adenocarcinoma, NOS                                             | 0 | 1 | 1 | 0 | 0 | 0 | AK  | 0.5101 | 2.8143 | 2.9934 | 3.0554 | 2.5442 | 3.1154 |
| DS-58258 | i   | Left  | Primary    | Adenocarcinoma, Mucinous (Greater Than 50% Mucinous)            | 0 | 1 | 0 | 0 | 1 | 0 | AP  | 0.3317 | 2.6470 | 2.9015 | 2.8735 | 2.8094 | 3.2591 |
| DS-58275 | iii | Left  | Metastatic | Adenocarcinoma, NOS                                             | 0 | 1 | 1 | 0 | 0 | 0 | AK  | 0.5431 | 2.7625 | 2.9662 | 3.0565 | 2.3706 | 3.0750 |
| DS-58341 | iv  | Left  | Metastatic | Adenocarcinoma, NOS                                             | 0 | 1 | 1 | 0 | 1 | 0 | APK | 0.4729 | 2.7659 | 2.9074 | 2.9833 | 2.5804 | 3.0711 |
| DS-58440 |     | Left  | Primary    | Adenocarcinoma, NOS                                             | 0 | 1 | 1 | 0 | 1 | 0 | APK | 0.5849 | 2.7434 | 2.8892 | 2.9578 | 3.3105 | 3.4040 |
| DS-58478 | ii  | Right | Primary    | Adenocarcinoma, NOS                                             | 0 | 0 | 0 | 0 | 0 | 0 | WT  | 0.3449 | 2.7094 | 2.9210 | 2.9123 | 3.1206 | 3.2836 |
| DS-58510 | ii  | Left  | Primary    | Adenocarcinoma, NOS                                             | 0 | 0 | 0 | 0 | 1 | 0 | P   | 0.4622 | 2.7097 | 2.9738 | 2.9938 | 2.8020 | 3.2804 |
| DS-58532 | iii | Left  | Primary    | Carcinoma, Signet Ring Cell (Greater Than 50% Signet Ring Cell) | 0 | 0 | 0 | 0 | 0 | 0 | WT  | 0.3548 | 2.5731 | 2.6950 | 2.6125 | 1.5298 | 2.9025 |
| DS-58548 | iv  | Right | Primary    | Adenocarcinoma, NOS                                             | 0 | 1 | 1 | 0 | 1 | 0 | APK | 0.7193 | 2.7466 | 2.9859 | 3.1397 | 3.1956 | 3.1641 |
| DS-58694 | iv  | Left  | Primary    | Adenocarcinoma, NOS                                             | 0 | 1 | 0 | 0 | 1 | 0 | AP  | 0.4841 | 2.7562 | 2.9565 | 3.0284 | 3.2879 | 3.4311 |
| DS-58843 | iii | Right | Metastatic | Adenocarcinoma, NOS                                             | 0 | 0 | 1 | 0 | 1 | 0 | PK  | 0.5484 | 2.7649 | 2.9356 | 3.0254 | 1.7828 | 2.9609 |
| DS-59213 | iii | Left  | Primary    | Adenocarcinoma, Mucinous (Greater Than 50% Mucinous)            | 0 | 0 | 0 | 0 | 0 | 1 | B   | 0.2571 | 2.7178 | 2.9321 | 2.9351 | 1.7976 | 2.8795 |
| DS-59550 | i   | Left  | Primary    | Adenocarcinoma, Mucinous (Greater Than 50% Mucinous)            | 0 | 0 | 0 | 0 | 0 | 0 | WT  | 0.3126 | 2.7336 | 2.8274 | 2.7039 | 3.3345 | 3.3265 |
| DS-59556 | iv  | Right | Metastatic | Adenocarcinoma, NOS                                             | 0 | 0 | 0 | 0 | 1 | 0 | P   | 0.4622 | 2.7817 | 2.9457 | 2.8694 | 3.0797 | 3.2099 |
| DS-59919 | ii  | Left  | Primary    | Adenocarcinoma, NOS                                             | 1 | 1 | 0 | 0 | 0 | 0 | A   | 0.5323 | 2.5690 | 2.8291 | 2.9108 | 3.0890 | 3.2426 |
| DS-59932 | iv  | Right | Metastatic | Adenocarcinoma, NOS                                             | 0 | 1 | 0 | 0 | 1 | 0 | AP  | 0.4000 | 2.6441 | 2.9456 | 2.9867 | 2.9872 | 3.0954 |
| DS-60252 | iii | Left  | Metastatic | Adenocarcinoma, NOS                                             | 0 | 1 | 1 | 0 | 0 | 0 | AK  | 0.5006 | 2.9064 | 3.0301 | 3.1487 | 3.1872 | 3.1070 |
| DS-60296 | iii | Left  | Metastatic | Adenocarcinoma, NOS                                             | 0 | 1 | 1 | 0 | 1 | 0 | APK | 0.6067 | 2.8621 | 3.0190 | 3.1035 | 3.3198 | 3.4724 |
| DS-60313 | iii | Left  | Primary    | Adenocarcinoma, NOS                                             | 0 | 1 | 0 | 0 | 1 | 0 | AP  | 0.7307 | 2.7075 | 2.9418 | 3.0504 | 3.2218 | 3.3515 |
| DS-60341 | i   | Right | Metastatic | Adenocarcinoma, NOS                                             | 0 | 1 | 1 | 0 | 0 | 0 | AK  | 0.6162 | 2.7168 | 2.9135 | 3.0892 | 3.1803 | 3.2987 |
| DS-60353 | iii | Right | Metastatic | Adenocarcinoma, NOS                                             | 0 | 1 | 1 | 0 | 1 | 0 | APK | 0.5932 | 2.7597 | 2.9398 | 3.0641 | 3.0849 | 3.3071 |
| DS-61202 |     | Left  | Primary    | Adenocarcinoma, NOS                                             | 0 | 1 | 1 | 0 | 0 | 0 | AK  | 0.6051 | 2.7634 | 2.9444 | 3.0311 | 3.3014 | 3.2261 |
| DS-67013 | ii  | Right | Metastatic | Adenocarcinoma, NOS                                             | 0 | 1 | 1 | 0 | 1 | 0 | APK | 0.7118 | 2.8388 | 2.9444 | 3.0325 | 3.1973 | 3.2701 |
| DS-67027 | iii | Right | Metastatic | Adenocarcinoma, NOS                                             | 1 | 0 | 1 | 0 | 1 | 0 | PK  | 0.2849 | 2.8679 | 2.7912 | 2.6881 | 1.6527 | 3.3975 |
| DS-67030 | iv  | Right | Metastatic | Adenocarcinoma, NOS                                             | 0 | 1 | 1 | 0 | 0 | 0 | AK  | 0.6802 | 2.8689 | 2.9690 | 3.0843 | 3.2722 | 3.4324 |
| DS-67065 | ii  | Left  | Primary    | Adenocarcinoma, NOS                                             | 0 | 1 | 0 | 0 | 1 | 0 | AP  | 0.6727 | 2.7539 | 2.8775 | 3.0013 | 3.2942 | 3.4145 |
| DS-67098 | ii  | Left  | Primary    | Adenocarcinoma, Mucinous (Greater Than 50% Mucinous)            | 0 | 0 | 0 | 0 | 0 | 0 | WT  | 0.3395 | 2.7080 | 2.8910 | 2.8074 | 2.7698 | 3.1939 |
| DS-67162 | iii | Right | Metastatic | Adenocarcinoma, NOS                                             | 0 | 1 | 1 | 0 | 1 | 0 | APK | 0.6295 | 2.8871 | 3.0270 | 3.1304 | 3.0611 | 3.3157 |
| DS-67827 | ii  | Left  | Metastatic | Adenocarcinoma, Mucinous                                        | 0 | 1 | 1 | 0 | 0 | 0 | AK  | 0.4034 | 2.7204 | 2.9165 | 2.9290 | 2.4685 | 3.0302 |
| DS-67844 | iv  | Left  | Metastatic | Adenocarcinoma, NOS                                             | 0 | 1 | 0 | 0 | 1 | 0 | AP  | 0.7130 | 2.6030 | 2.7928 | 2.8821 | 1.5258 | 2.6115 |
| DS-67914 | iv  |       | Metastatic | Adenocarcinoma, Mucinous                                        | 0 | 1 | 1 | 0 | 1 | 0 | APK | 0.2831 | 2.8444 | 2.9108 | 2.8569 | 2.5882 | 3.1850 |
| DS-67931 | iii | Left  | Metastatic | Adenocarcinoma, NOS                                             | 0 | 0 | 1 | 0 | 0 | 0 | K   | 0.3713 | 2.7594 | 2.9805 | 2.9543 | 2.7154 | 3.0923 |
| DS-67949 | ii  | Left  | Metastatic | Adenocarcinoma, Mucinous                                        | 0 | 1 | 1 | 0 | 1 | 0 | APK | 0.6009 | 2.7012 | 2.9676 | 3.0484 | 2.9988 | 2.9860 |
| DS-67955 | iii | Left  | Metastatic | Adenocarcinoma, NOS                                             | 0 | 1 | 1 | 0 | 1 | 0 | APK | 0.3931 | 2.8806 | 3.0234 | 2.9854 | 2.5176 | 3.5684 |
| DS-67956 | iii | Left  | Metastatic | Adenocarcinoma, NOS                                             | 0 | 1 | 0 | 0 | 1 | 0 | AP  | 0.7368 | 2.6457 | 2.9390 | 3.0961 | 3.1605 | 3.3649 |
| DS-67980 | iii | Left  | Metastatic | Adenocarcinoma, NOS                                             | 0 | 1 | 0 | 0 | 0 | 0 | A   | 0.6341 | 2.7111 | 2.9783 | 3.0413 | 3.3397 | 3.4263 |

|          |     |       |            |                                                      |   |   |   |   |   |   |     |        |        |        |        |        |        |
|----------|-----|-------|------------|------------------------------------------------------|---|---|---|---|---|---|-----|--------|--------|--------|--------|--------|--------|
| DS-67984 | iii | Left  | Metastatic | Adenocarcinoma, NOS                                  | 0 | 0 | 0 | 0 | 1 | 0 | P   | 0.6706 | 2.5812 | 2.9184 | 2.9746 | 3.3809 | 3.2585 |
| DS-68634 | iii | Left  | Primary    | Adenocarcinoma, NOS                                  | 0 | 1 | 1 | 0 | 0 | 0 | AK  | 0.4666 | 2.7949 | 2.9549 | 3.0305 | 3.2086 | 3.2950 |
| DS-68849 | iv  | Right | Primary    | Adenocarcinoma, NOS                                  | 0 | 1 | 0 | 0 | 1 | 0 | AP  | 0.6483 | 2.7163 | 2.9726 | 3.0204 | 3.2336 | 3.2778 |
| DS-68891 | iv  | Left  | Primary    | Adenocarcinoma, NOS                                  | 0 | 1 | 0 | 0 | 0 | 0 | A   | 0.6715 | 2.6648 | 2.8955 | 2.9923 | 3.2896 | 3.4131 |
| DS-69122 | iv  | Left  | Metastatic | Adenocarcinoma, NOS                                  | 0 | 1 | 0 | 0 | 1 | 0 | AP  | 0.6427 | 2.6296 | 2.8676 | 3.0525 | 3.4329 | 3.5241 |
| DS-69164 | i   | Left  | Primary    | Adenocarcinoma, NOS                                  | 0 | 1 | 0 | 0 | 1 | 0 | AP  | 0.6024 | 2.7252 | 2.9529 | 3.0529 | 3.4263 | 3.5483 |
| DS-69689 | iv  | Left  | Primary    | Adenocarcinoma, NOS                                  | 0 | 1 | 0 | 0 | 0 | 0 | A   | 0.5477 | 2.7066 | 2.9396 | 3.0070 | 3.0572 | 3.2948 |
| DS-70294 | iv  | Left  | Metastatic | Adenocarcinoma, NOS                                  | 0 | 1 | 0 | 0 | 1 | 0 | AP  | 0.7476 | 2.6123 | 2.8521 | 3.0669 | 3.1485 | 3.3080 |
| DS-87902 | iii | Left  | Primary    | Adenocarcinoma, NOS                                  | 0 | 1 | 1 | 0 | 1 | 0 | APK | 0.5459 | 2.8021 | 2.9823 | 3.0524 | 2.6503 | 3.1622 |
| DS-87910 | ii  | Left  | Primary    | Adenocarcinoma, NOS                                  | 0 | 1 | 0 | 0 | 0 | 0 | A   | 0.3019 | 2.7861 | 2.9932 | 2.9469 | 3.0166 | 3.3783 |
| DS-49521 | iv  | Right | Metastatic | Adenocarcinoma, NOS                                  | 1 | 0 | 0 | 0 | 0 | 0 | WT  | 0.3864 | 3.0012 |        |        |        |        |
| DS-51941 | iii | Left  | Metastatic | Adenocarcinoma, NOS                                  | 0 | 1 | 0 | 0 | 0 | 0 | A   | 0.4635 | 2.5273 |        |        |        |        |
| DS-51942 | iii | Right | Primary    | Adenocarcinoma, NOS                                  | 1 | 0 | 0 | 0 | 0 | 1 | B   | 0.3977 | 2.8139 |        |        |        |        |
| DS-54038 | ii  | Left  | Primary    | Adenocarcinoma, Mucinous (Greater Than 50% Mucinous) | 0 | 0 | 0 | 0 | 0 | 0 | WT  | 0.2650 | 2.6637 |        |        |        |        |
| DS-54429 | iii | Left  | Primary    | Adenocarcinoma, NOS                                  | 0 | 1 | 0 | 0 | 1 | 0 | AP  | 0.6509 | 2.6660 |        |        |        |        |
| DS-54718 | iv  | Left  | Metastatic | Adenocarcinoma, NOS                                  | 0 | 0 | 0 | 0 | 0 | 0 | WT  | 0.4801 | 2.6093 |        |        |        |        |
| DS-59974 | ii  | Left  | Metastatic | Adenocarcinoma, NOS                                  | 0 | 0 | 0 | 0 | 0 | 0 | WT  | 0.0775 | 2.3226 |        |        |        |        |
| DS-61205 | ii  | Left  | Primary    | Adenocarcinoma, NOS                                  | 0 | 1 | 1 | 0 | 0 | 0 | AK  | 0.4875 | 2.7058 |        |        |        |        |
| DS-67953 | iv  | Right | Metastatic | Adenocarcinoma, NOS                                  | 0 | 1 | 1 | 0 | 0 | 0 | AK  | 0.4724 | 2.6038 |        |        |        |        |
| DS-67994 |     | Left  | Primary    | Adenocarcinoma, NOS                                  | 0 | 1 | 0 | 0 | 1 | 0 | AP  | 0.6574 | 2.5903 |        |        |        |        |

**Supplementary Table S5. TCGA CRCs (n=624 including 221 DNA-sequenced samples from TCGA (2012) (6))**---Stages, MSI status, driver mutations and signature scores

**Note:** The signature scores were calculated as described in Methods and merged with other TCGA clinical and molecular parameters adopted from NCI GDC databases; 1 — mut; 0 — wt; A — APC truncating mutation; P — TP53 mutation; K — KRAS mutation; N — NRAS mutation; B — BRAF(V600E).

| Barcode      | COAD/READ | Composite Staging | Tumor Location | MSI and Mutation Status |     |      |      |      |      |           | Signature Scores (gene expression) |                  |                                     |                                     |              |              |
|--------------|-----------|-------------------|----------------|-------------------------|-----|------|------|------|------|-----------|------------------------------------|------------------|-------------------------------------|-------------------------------------|--------------|--------------|
|              |           |                   |                | MSI-high                | APC | KRAS | NRAS | TP53 | BRAF | A/P/K/N/B | Cetuximab Sensitivity Score        | 18-gene AZ score | 64-gene Wnt/ $\beta$ -catenin score | 24-gene Wnt/ $\beta$ -catenin score | EREG (log10) | AREG (log10) |
| TCGA-A6-2672 | COAD      | stage iiib        |                | 1                       | 0   | 0    | 0    | 0    | 1    | B         | 0.4569                             | 3.6783           | 3.4128                              | 3.3222                              | 1.9180       | 2.7660       |
| TCGA-A6-2674 | COAD      | stage iv          | Left           | 0                       | 1   | 1    | 0    | 0    | 0    | AP        | 0.2289                             | 3.6898           | 3.4672                              | 3.3015                              | 2.2858       | 2.4531       |
| TCGA-A6-2676 | COAD      | stage iib         | Right          | 1                       | 0   | 1    | 0    | 0    | 1    | B         | -0.0079                            | 3.5928           | 3.2705                              | 3.1081                              | 1.6849       | 2.2120       |
| TCGA-A6-2677 | COAD      | stage iiic        | Right          | 0                       | 1   | 0    | 0    | 0    | 0    | A         | 0.7160                             | 3.5552           | 3.3780                              | 3.5403                              | 3.3054       | 3.4381       |
| TCGA-A6-2678 | COAD      | stage iiib        | Right          | 0                       | 0   | 1    | 0    | 1    | 0    | PN        | 0.4952                             | 3.5690           | 3.2790                              | 3.2740                              | 3.0516       | 3.2989       |
| TCGA-A6-2683 | COAD      | stage iv          | Right          | 0                       | 0   | 1    | 1    | 0    | 0    | PK        | 0.5233                             | 3.6226           | 3.3312                              | 3.4036                              | 1.7513       | 2.0844       |
| TCGA-A6-3807 | COAD      | stage iiic        | Left           | 0                       | 1   | 1    | 0    | 0    | 0    | AP        | 0.8504                             | 3.7501           | 3.4562                              | 3.4220                              | 3.3852       | 3.6580       |
| TCGA-A6-3808 | COAD      | stage iia         | Right          | 0                       | 1   | 0    | 1    | 0    | 0    | AK        | 0.1814                             | 3.6000           | 3.4031                              | 3.4751                              | 3.3093       | 3.3228       |
| TCGA-A6-3810 | COAD      | stage iia         | Left           | 0                       | 1   | 1    | 0    | 0    | 0    | AP        | 0.8837                             | 3.5999           | 3.3548                              | 3.3577                              | 3.2414       | 3.2244       |
| TCGA-AA-3514 | COAD      | stage i           | Right          | 0                       | 0   | 0    | 0    | 0    | 0    | WT        | 0.6326                             | 3.5548           | 3.3371                              | 3.3604                              | 2.5959       | 2.8519       |
| TCGA-AA-3516 | COAD      | stage iii         | Right          | 1                       | 0   | 0    | 0    | 0    | 1    | B         | 0.3999                             | 3.8848           | 3.4523                              | 3.1097                              | 3.5270       | 3.3125       |
| TCGA-AA-3517 | COAD      | stage iia         | Left           | 0                       | 0   | 1    | 0    | 0    | 0    | P         | 0.5325                             | 3.5492           | 3.2704                              | 3.2609                              | 2.4864       | 2.3374       |
| TCGA-AA-3518 | COAD      | stage iia         | Right          | 1                       | 0   | 0    | 0    | 0    | 0    | WT        | 0.2612                             | 3.6750           | 3.2798                              | 3.2529                              | 1.6173       | 2.2499       |
| TCGA-AA-3519 | COAD      | stage iii         | Left           | 0                       | 2   | 1    | 0    | 0    | 0    | AP        | 0.4886                             | 3.4928           | 3.3351                              | 3.4922                              | 3.1617       | 3.5165       |
| TCGA-AA-3520 | COAD      | stage ii          | Right          | 0                       | 0   | 1    | 1    | 0    | 0    | PK        | 0.4714                             | 3.6300           | 3.2953                              | 3.2779                              | 2.8982       | 3.2086       |
| TCGA-AA-3521 | COAD      | stage ii          | Left           | 0                       | 1   | 0    | 1    | 0    | 0    | AK        | 0.6025                             | 3.6260           | 3.4004                              | 3.4735                              | 2.6566       | 2.4830       |
| TCGA-AA-3522 | COAD      | stage iia         | Right          | 0                       | 1   | 0    | 1    | 0    | 0    | AK        | 0.3375                             | 3.7144           | 3.2872                              | 3.2707                              | 2.1129       | 2.7765       |
| TCGA-AA-3524 | COAD      | stage ii          | Left           | 0                       | 1   | 1    | 0    | 0    | 0    | AP        | 0.7242                             | 3.6732           | 3.3548                              | 3.4493                              | 3.7302       | 3.6990       |
| TCGA-AA-3525 | COAD      | stage iiib        | Right          | 1                       | 0   | 0    | 0    | 0    | 1    | B         | 0.1862                             | 3.6762           | 3.2498                              | 3.1072                              | 1.6483       | 2.3511       |
| TCGA-AA-3526 | COAD      | stage i           | Left           | 0                       | 0   | 1    | 0    | 0    | 0    | P         | 0.5939                             | 3.7259           | 3.4825                              | 3.4410                              | 3.3870       | 3.4531       |
| TCGA-AA-3527 | COAD      | stage iia         | Right          | 0                       | 1   | 0    | 0    | 0    | 0    | A         | 0.4471                             | 3.5824           | 3.3845                              | 3.4332                              | 2.2049       | 2.5133       |
| TCGA-AA-3529 | COAD      | stage iiic        | Left           | 0                       | 0   | 0    | 0    | 0    | 0    | WT        | 0.2641                             | 3.5016           | 3.3533                              | 3.4313                              | 3.3166       | 3.6601       |
| TCGA-AA-3530 | COAD      | stage i           | Right          | 0                       | 1   | 0    | 1    | 0    | 0    | AK        | 0.5303                             | 3.4644           | 3.3476                              | 3.5045                              | 3.0999       | 3.4725       |
| TCGA-AA-3531 | COAD      | stage iia         | Left           | 0                       | 2   | 1    | 0    | 0    | 0    | AP        | 0.4861                             | 3.6059           | 3.2937                              | 3.3267                              | 2.6342       | 3.0674       |
| TCGA-AA-3532 | COAD      | stage iia         | Left           | 0                       | 1   | 0    | 1    | 0    | 0    | AK        | 0.7229                             | 3.5094           | 3.3841                              | 3.4363                              | 3.0975       | 3.0032       |
| TCGA-AA-3534 | COAD      | stage iia         | Right          | 0                       | 0   | 0    | 0    | 0    | 0    | WT        | 0.4740                             | 3.4813           | 3.2735                              | 3.3341                              | 2.4266       | 3.0376       |
| TCGA-AA-3538 | COAD      | stage i           | Left           | 0                       | 1   | 0    | 0    | 0    | 0    | A         | 0.6904                             | 3.4280           | 3.3030                              | 3.4512                              | 3.4628       | 3.6534       |
| TCGA-AA-3542 | COAD      | stage iiic        | Left           | 0                       | 1   | 1    | 0    | 0    | 0    | AP        | 0.8214                             | 3.9118           | 3.4468                              | 3.4072                              | 2.7611       | 3.2553       |
| TCGA-AA-3543 | COAD      | stage i           | Right          | 1                       | 0   | 0    | 0    | 0    | 1    | B         | 0.3167                             | 3.7578           | 3.3892                              | 3.2276                              | 1.2962       | 2.2369       |
| TCGA-AA-3544 | COAD      | stage i           | Left           | 0                       | 2   | 0    | 0    | 0    | 0    | A         | 0.6799                             | 3.5850           | 3.3279                              | 3.4192                              | 2.2792       | 3.1092       |
| TCGA-AA-3548 | COAD      | stage iiic        | Right          | 0                       | 1   | 0    | 1    | 0    | 0    | AK        | 0.7229                             | 3.6894           | 3.3518                              | 3.4065                              | 2.6405       | 2.9355       |
| TCGA-AA-3549 | COAD      | stage i           | Right          | 0                       | 0   | 1    | 0    | 1    | 0    | PN        | 0.7592                             | 3.6257           | 3.4016                              | 3.4615                              | 2.3185       | 2.6559       |
| TCGA-AA-3552 | COAD      | stage iiic        | Right          | 0                       | 1   | 1    | 0    | 0    | 0    | AP        | 0.6497                             | 3.4250           | 3.2500                              | 3.3479                              | 2.5396       | 2.9729       |
| TCGA-AA-3553 | COAD      | stage i           | Left           | 0                       | 1   | 1    | 0    | 0    | 0    | AP        | 0.7874                             | 3.5615           | 3.3807                              | 3.4369                              | 3.7368       | 3.6233       |
| TCGA-AA-3554 | COAD      | stage iia         | Right          | 1                       | 0   | 0    | 0    | 0    | 0    | WT        | 0.3485                             | 3.7141           | 3.4492                              | 3.2435                              | 1.7984       | 2.9949       |
| TCGA-AA-3555 | COAD      | stage iia         | Right          | 0                       | 3   | 0    | 1    | 0    | 0    | AK        | -0.0190                            | 3.6594           | 3.3979                              | 3.3734                              | 1.8721       | 2.5944       |
| TCGA-AA-3556 | COAD      | stage i           | Left           | 0                       | 1   | 1    | 1    | 0    | 0    | APK       | 0.2918                             | 3.7064           | 3.4695                              | 3.4271                              | 1.6508       | 3.4943       |

|              |      |           |       |   |   |   |   |   |   |     |         |        |        |        |        |        |
|--------------|------|-----------|-------|---|---|---|---|---|---|-----|---------|--------|--------|--------|--------|--------|
| TCGA-AA-3560 | COAD | stage iic | Left  | 0 | 0 | 1 | 1 | 0 | 0 | PK  | 0.3585  | 3.6130 | 3.3200 | 3.2864 | 2.5192 | 3.1824 |
| TCGA-AA-3561 | COAD | stage iia | Right | 0 | 1 | 1 | 1 | 0 | 0 | APK | 0.7567  | 3.7337 | 3.3653 | 3.3373 | 3.2871 | 3.3922 |
| TCGA-AA-3562 | COAD | stage iic | Left  | 0 | 1 | 1 | 0 | 0 | 0 | AP  | 0.6818  | 3.3945 | 3.2919 | 3.4554 | 2.0080 | 2.4944 |
| TCGA-AA-3664 | COAD | stage ii  | Right | 0 | 0 | 0 | 0 | 0 | 1 | B   | 0.4552  | 3.5078 | 3.3349 | 3.3816 | 2.3023 | 2.7891 |
| TCGA-AA-3666 | COAD | stage iii | Right | 0 | 1 | 1 | 0 | 1 | 0 | APN | 0.6606  | 3.5926 | 3.2627 | 3.2807 | 2.0448 | 2.6803 |
| TCGA-AA-3667 | COAD | stage i   | Left  | 0 | 2 | 1 | 0 | 0 | 0 | AP  | 0.8235  | 3.5484 | 3.3873 | 3.5372 | 2.8113 | 3.0992 |
| TCGA-AA-3672 | COAD | stage iii | Right | 1 | 0 | 0 | 1 | 0 | 0 | K   | 0.3298  | 3.5672 | 3.3976 | 3.4431 | 0.8083 | 1.6212 |
| TCGA-AA-3673 | COAD | stage ii  | Right | 0 | 1 | 1 | 1 | 0 | 0 | APK | 0.4651  | 3.5016 | 3.3574 | 3.4872 | 3.2052 | 2.8706 |
| TCGA-AA-3678 | COAD | stage iii | Left  | 0 | 1 | 0 | 0 | 0 | 0 | A   | 0.6310  | 3.4821 | 3.3405 | 3.4119 | 3.5549 | 3.8888 |
| TCGA-AA-3679 | COAD | stage iv  | Left  | 0 | 2 | 1 | 0 | 0 | 0 | AP  | 0.7877  | 3.6999 | 3.2320 | 3.3120 | 3.3880 | 3.7459 |
| TCGA-AA-3680 | COAD | stage iv  | Right | 0 | 2 | 0 | 1 | 0 | 0 | AK  | 0.2055  | 3.6164 | 3.3612 | 3.4710 | 1.6491 | 2.3915 |
| TCGA-AA-3681 | COAD | stage iii | Right | 0 | 2 | 1 | 1 | 0 | 0 | APK | 0.5109  | 3.6308 | 3.3861 | 3.4199 | 1.9411 | 2.8213 |
| TCGA-AA-3684 | COAD | stage iv  | Right | 0 | 1 | 0 | 0 | 0 | 1 | AB  | -0.0213 | 3.6525 | 3.4369 | 3.4157 | 2.0343 | 2.8836 |
| TCGA-AA-3685 | COAD | stage ii  | Left  | 0 | 2 | 1 | 0 | 0 | 0 | AP  | 0.6571  | 3.8000 | 3.4420 | 3.3928 | 3.4069 | 3.4341 |
| TCGA-AA-3688 | COAD | stage iv  | Left  | 0 | 1 | 0 | 0 | 0 | 0 | A   | 0.8216  | 3.4878 | 3.3198 | 3.4800 | 2.8321 | 3.0323 |
| TCGA-AA-3692 | COAD | stage iv  | Left  | 0 | 2 | 0 | 0 | 0 | 0 | A   | 0.4289  | 3.5307 | 3.3769 | 3.5445 | 3.0345 | 3.3846 |
| TCGA-AA-3693 | COAD | stage iv  | Left  | 0 | 1 | 1 | 0 | 0 | 0 | AP  | 0.8156  | 3.6085 | 3.3216 | 3.4114 | 3.5125 | 3.7928 |
| TCGA-AA-3696 | COAD | stage iv  | Left  | 0 | 1 | 0 | 1 | 0 | 0 | AK  | 0.5305  | 3.3820 | 3.2378 | 3.3621 | 2.4117 | 2.7874 |
| TCGA-AA-3710 | COAD | stage iia | Right | 1 | 0 | 0 | 0 | 0 | 0 | WT  | 0.1373  | 3.6757 | 3.3025 | 3.0702 | 2.7155 | 2.6230 |
| TCGA-AA-3715 | COAD | stage ii  | Right | 1 | 0 | 0 | 1 | 0 | 1 | KB  | 0.2693  | 3.8285 | 3.5594 | 3.0944 | 2.6807 | 2.7725 |
| TCGA-AA-3811 | COAD | stage iii | Right | 1 | 0 | 1 | 0 | 0 | 0 | P   | 0.1426  | 3.5832 | 3.3197 | 3.3354 | 1.6528 | 2.8123 |
| TCGA-AA-3812 | COAD | stage iia | Left  | 0 | 1 | 0 | 0 | 0 | 0 | A   | 0.1822  | 3.6118 | 3.4205 | 3.4292 | 2.5168 | 2.7950 |
| TCGA-AA-3814 | COAD | stage iia | Right | 0 | 1 | 1 | 1 | 0 | 0 | APK | 0.7617  | 3.6583 | 3.3734 | 3.4172 | 3.2225 | 3.2631 |
| TCGA-AA-3818 | COAD | stage iia | Right | 0 | 2 | 0 | 1 | 0 | 0 | AK  | 0.5352  | 3.8019 | 3.4472 | 3.4919 | 2.6963 | 3.0283 |
| TCGA-AA-3819 | COAD | stage iia | Left  | 0 | 0 | 0 | 0 | 1 | 0 | N   | 0.3421  | 3.5712 | 3.3230 | 3.3859 | 3.1847 | 3.5314 |
| TCGA-AA-3821 | COAD | stage i   | Right | 1 | 0 | 0 | 0 | 0 | 1 | B   | -0.1566 | 3.5566 | 3.2728 | 3.2284 | 1.7935 | 2.5585 |
| TCGA-AA-3831 | COAD | stage iia | Left  | 0 | 0 | 0 | 0 | 0 | 0 | WT  | 0.7081  | 3.5769 | 3.4122 | 3.5648 | 3.3481 | 3.6226 |
| TCGA-AA-3833 | COAD | stage iia | Right | 1 | 0 | 0 | 0 | 0 | 1 | B   | 0.2164  | 3.8616 | 3.5086 | 3.2605 | 3.0187 | 2.9663 |
| TCGA-AA-3837 | COAD | stage iia | Right | 0 | 2 | 0 | 1 | 0 | 0 | AK  | 0.6377  | 3.6656 | 3.4669 | 3.5771 | 2.5783 | 2.8814 |
| TCGA-AA-3842 | COAD | stage iia | Left  | 0 | 0 | 1 | 1 | 0 | 0 | PK  | 0.5112  | 3.5090 | 3.2305 | 3.2804 | 2.4191 | 2.8471 |
| TCGA-AA-3844 | COAD | stage iic | Left  | 0 | 0 | 1 | 1 | 0 | 0 | PK  | 0.6782  | 3.5977 | 3.3065 | 3.3830 | 2.7271 | 3.1924 |
| TCGA-AA-3845 | COAD | stage iia | Right | 1 | 0 | 0 | 1 | 0 | 0 | K   | 0.3214  | 3.8476 | 3.4290 | 3.1969 | 3.5770 | 2.8944 |
| TCGA-AA-3846 | COAD | stage iia | Left  | 0 | 1 | 0 | 0 | 0 | 0 | A   | 0.7179  | 3.5109 | 3.3604 | 3.4788 | 3.8909 | 3.7093 |
| TCGA-AA-3848 | COAD | stage iic | Left  | 0 | 1 | 1 | 1 | 0 | 0 | APK | 0.5036  | 3.5168 | 3.4691 | 3.6868 | 3.0666 | 3.2411 |
| TCGA-AA-3850 | COAD | stage i   | Right | 0 | 0 | 0 | 0 | 1 | 0 | N   | 0.5074  | 3.6669 | 3.3980 | 3.4566 | 2.8891 | 3.1665 |
| TCGA-AA-3851 | COAD | stage iia | Right | 0 | 1 | 1 | 1 | 0 | 0 | APK | 0.5117  | 3.7379 | 3.3436 | 3.2790 | 1.5607 | 2.5149 |
| TCGA-AA-3852 | COAD | stage iia | Right | 0 | 1 | 0 | 1 | 0 | 0 | AK  | 0.0433  | 3.7266 | 3.4329 | 3.4147 | 1.3963 | 2.5018 |
| TCGA-AA-3854 | COAD | stage i   | Left  | 0 | 1 | 0 | 1 | 0 | 0 | AK  | 0.0330  | 3.8108 | 3.5035 | 3.4143 | 1.2808 | 2.6964 |
| TCGA-AA-3855 | COAD | stage i   | Left  | 0 | 1 | 0 | 0 | 0 | 0 | A   | 0.3334  | 3.6523 | 3.3488 | 3.4485 | 2.9309 | 3.3378 |
| TCGA-AA-3856 | COAD | stage iia | Left  | 0 | 1 | 1 | 0 | 0 | 0 | AP  | 0.6446  | 3.6206 | 3.4086 | 3.5360 | 2.8506 | 3.3332 |
| TCGA-AA-3858 | COAD | stage i   | Left  | 0 | 1 | 1 | 0 | 0 | 0 | AP  | 0.6378  | 3.7202 | 3.4765 | 3.5763 | 3.1032 | 3.2709 |
| TCGA-AA-3860 | COAD | stage iib | Left  | 0 | 2 | 1 | 0 | 0 | 0 | AP  | 0.8691  | 3.6353 | 3.3902 | 3.3830 | 2.2762 | 2.9497 |
| TCGA-AA-3864 | COAD | stage ii  | Right | 1 | 3 | 0 | 1 | 1 | 0 | AKN | 0.1215  | 3.5911 | 3.2911 | 3.2155 | 2.1197 | 2.5014 |
| TCGA-AA-3866 | COAD | stage i   | Right | 0 | 1 | 1 | 0 | 0 | 0 | AP  | 0.8019  | 3.4195 | 3.3911 | 3.4923 | 3.0480 | 3.2431 |
| TCGA-AA-3867 | COAD | stage iv  | Left  | 0 | 0 | 1 | 0 | 0 | 0 | P   | 0.7043  | 3.5698 | 3.4017 | 3.5025 | 2.2040 | 2.5162 |
| TCGA-AA-3869 | COAD | stage iv  | Right | 0 | 1 | 1 | 0 | 0 | 0 | AP  | 0.6690  | 3.6054 | 3.3497 | 3.3420 | 2.9242 | 3.1168 |
| TCGA-AA-3870 | COAD | stage iv  | Right | 0 | 1 | 0 | 1 | 0 | 0 | AK  | 0.2821  | 3.8179 | 3.6027 | 3.4518 | 2.5692 | 3.2876 |
| TCGA-AA-3872 | COAD | stage iv  | Left  | 0 | 1 | 0 | 0 | 0 | 0 | A   | 0.6512  | 3.6433 | 3.4253 | 3.3754 | 1.9306 | 2.4925 |
| TCGA-AA-3875 | COAD | stage i   | Right | 0 | 0 | 1 | 0 | 0 | 0 | P   | 0.4513  | 3.5652 | 3.3554 | 3.4659 | 3.4999 | 3.3924 |
| TCGA-AA-3877 | COAD | stage i   | Right | 1 | 0 | 0 | 0 | 0 | 1 | B   | -0.0712 | 3.6685 | 3.3364 | 3.1725 | 2.4883 | 2.8359 |

|              |      |            |       |   |   |   |   |   |   |     |         |        |        |        |        |        |
|--------------|------|------------|-------|---|---|---|---|---|---|-----|---------|--------|--------|--------|--------|--------|
| TCGA-AA-3930 | COAD | stage iv   | Right | 0 | 2 | 1 | 1 | 0 | 0 | APK | 0.4284  | 3.6558 | 3.3241 | 3.2738 | 2.7556 | 2.8982 |
| TCGA-AA-3939 | COAD | stage iia  | Right | 0 | 2 | 0 | 1 | 0 | 0 | AK  | 0.6329  | 3.9867 | 3.5723 | 3.4159 | 3.3707 | 3.3019 |
| TCGA-AA-3941 | COAD | stage iva  | Right | 0 | 1 | 1 | 1 | 0 | 0 | APK | 0.5885  | 3.8705 | 3.4244 | 3.3577 | 2.3643 | 2.7669 |
| TCGA-AA-3947 | COAD | stage iib  | Right | 1 | 1 | 0 | 0 | 0 | 1 | AB  | 0.1606  | 3.6855 | 3.3513 | 3.2962 | 2.3811 | 2.9898 |
| TCGA-AA-3949 | COAD | stage iiib | Right | 1 | 0 | 1 | 0 | 0 | 1 | PB  | 0.1560  | 3.8622 | 3.4505 | 3.0579 | 2.3418 | 2.4284 |
| TCGA-AA-3952 | COAD | stage iiic | Left  | 0 | 1 | 0 | 0 | 0 | 0 | A   | 0.6306  | 3.7830 | 3.4159 | 3.3604 | 2.0863 | 3.0113 |
| TCGA-AA-3955 | COAD | stage iiib | Left  | 0 | 1 | 1 | 0 | 0 | 0 | AP  | 0.7951  | 3.5602 | 3.2609 | 3.3181 | 3.6552 | 3.6873 |
| TCGA-AA-3956 | COAD | stage iia  | Right | 0 | 0 | 1 | 0 | 0 | 0 | P   | 0.6226  | 3.4837 | 3.3098 | 3.4353 | 3.4406 | 3.4602 |
| TCGA-AA-3966 | COAD | stage iia  | Right | 1 | 0 | 0 | 0 | 0 | 1 | B   | 0.1946  | 3.9186 | 3.5444 | 3.3182 | 2.6237 | 2.6026 |
| TCGA-AA-3971 | COAD | stage iii  | Left  | 0 | 0 | 0 | 0 | 0 | 0 | WT  | 0.3505  | 3.5212 | 3.3065 | 3.4350 | 3.2679 | 3.4670 |
| TCGA-AA-3972 | COAD | stage iv   | Left  | 0 | 1 | 1 | 0 | 1 | 0 | APN | 0.7827  | 3.6772 | 3.3618 | 3.3862 | 3.3159 | 3.1977 |
| TCGA-AA-3973 | COAD | stage iv   | Left  | 0 | 2 | 0 | 0 | 1 | 0 | AN  | 0.8088  | 3.6118 | 3.4391 | 3.5328 | 2.1122 | 2.7933 |
| TCGA-AA-3975 | COAD | stage i    | Left  | 0 | 2 | 1 | 1 | 0 | 0 | APK | 0.4111  | 3.4456 | 3.3359 | 3.5261 | 2.8986 | 3.2530 |
| TCGA-AA-3976 | COAD | stage iiia | Left  | 0 | 2 | 1 | 0 | 1 | 0 | APN | 0.7611  | 3.5929 | 3.3383 | 3.4415 | 3.5292 | 3.6072 |
| TCGA-AA-3977 | COAD | NA         | Left  | 0 | 2 | 1 | 1 | 0 | 0 | APK | 0.4920  | 3.6094 | 3.3531 | 3.3487 | 2.5870 | 3.3711 |
| TCGA-AA-3979 | COAD | stage iia  | Left  | 0 | 1 | 1 | 1 | 0 | 0 | APK | 0.7921  | 3.7153 | 3.3784 | 3.4211 | 3.8089 | 3.7705 |
| TCGA-AA-3980 | COAD | stage i    | Left  | 0 | 1 | 1 | 0 | 0 | 0 | AP  | 0.6133  | 3.5057 | 3.3628 | 3.4844 | 3.3603 | 3.3785 |
| TCGA-AA-3982 | COAD | stage iiib | Left  | 0 | 2 | 1 | 0 | 0 | 0 | AP  | 0.6185  | 3.5802 | 3.3160 | 3.3598 | 3.5792 | 3.7450 |
| TCGA-AA-3984 | COAD | stage iia  | Left  | 0 | 1 | 0 | 0 | 0 | 0 | A   | 0.8026  | 3.5089 | 3.3721 | 3.4341 | 3.2028 | 3.4850 |
| TCGA-AA-3986 | COAD | stage i    | Right | 0 | 0 | 0 | 1 | 0 | 0 | K   | 0.5387  | 3.4938 | 3.3707 | 3.5158 | 2.3729 | 3.1539 |
| TCGA-AA-3989 | COAD | stage iv   | Right | 0 | 1 | 0 | 0 | 0 | 0 | A   | 0.8627  | 3.5576 | 3.3620 | 3.4788 | 2.8799 | 3.2334 |
| TCGA-AA-3994 | COAD | stage iiib | Right | 0 | 2 | 0 | 1 | 0 | 0 | AK  | -0.0064 | 4.0332 | 3.6061 | 3.3731 | 2.3971 | 3.3648 |
| TCGA-AA-A004 | COAD | stage iia  | Left  | 0 | 0 | 1 | 0 | 0 | 0 | P   | 0.0933  | 3.3541 | 3.3291 | 3.4287 | #NUM!  | 2.3979 |
| TCGA-AA-A00A | COAD | stage iia  | Right | 1 | 3 | 0 | 1 | 0 | 0 | AK  | 0.6204  | 3.5449 | 3.3593 | 3.4288 | 1.1725 | 1.9995 |
| TCGA-AA-A00D | COAD | stage i    | Right | 0 | 2 | 1 | 0 | 0 | 1 | APB | 0.5688  | 3.4599 | 3.3420 | 3.4313 | 1.8726 | 2.9083 |
| TCGA-AA-A00E | COAD | stage iia  | Right | 1 | 0 | 1 | 0 | 0 | 0 | P   | 0.1464  | 3.5453 | 3.2376 | 3.2184 | 0.9431 | 1.8639 |
| TCGA-AA-A00F | COAD | stage iiic | Left  | 0 | 0 | 1 | 0 | 1 | 0 | PN  | 0.4658  | 3.5832 | 3.3592 | 3.3575 | 3.0848 | 2.7135 |
| TCGA-AA-A00J | COAD | stage iiib | Right | 1 | 1 | 0 | 0 | 0 | 1 | AB  | 0.0370  | 3.5577 | 3.3258 | 3.3763 | 1.2572 | 2.1867 |
| TCGA-AA-A00K | COAD | stage iia  | Left  | 0 | 1 | 0 | 1 | 0 | 0 | AK  | 0.5217  | 3.6086 | 3.3893 | 3.5098 | 2.6696 | 2.9856 |
| TCGA-AA-A00L | COAD | stage iia  | Right | 0 | 1 | 1 | 0 | 0 | 0 | AP  | 0.8341  | 3.4850 | 3.3353 | 3.4922 | 3.0823 | 3.4141 |
| TCGA-AA-A00N | COAD | stage iib  | Right | 0 | 2 | 0 | 1 | 1 | 0 | ANB | 0.2596  | 3.5938 | 3.3756 | 3.3316 | 1.7647 | 2.5366 |
| TCGA-AA-A00O | COAD | stage iiic | Left  | 0 | 1 | 1 | 0 | 0 | 0 | AP  | 0.6519  | 3.2386 | 3.3272 | 3.4788 | 2.5751 | 2.8890 |
| TCGA-AA-A00Q | COAD | stage iiib | Left  | 0 | 0 | 0 | 1 | 0 | 0 | K   | 0.8537  | 3.7017 | 3.3754 | 3.4133 | 3.1913 | 3.1807 |
| TCGA-AA-A00R | COAD | stage i    | Right | 1 | 1 | 0 | 0 | 0 | 0 | A   | 0.2751  | 3.3532 | 3.1925 | 3.1210 | 1.1259 | 2.6242 |
| TCGA-AA-A00U | COAD | stage iiib | Right | 0 | 2 | 0 | 0 | 0 | 0 | A   | 0.4790  | 3.4893 | 3.3944 | 3.5580 | 3.4216 | 3.6807 |
| TCGA-AA-A00W | COAD | stage i    | Left  | 0 | 1 | 1 | 0 | 0 | 0 | AP  | 0.8011  | 3.5613 | 3.3896 | 3.5418 | 3.4406 | 3.5819 |
| TCGA-AA-A00Z | COAD | stage iia  | Left  | 0 | 1 | 0 | 0 | 0 | 0 | A   | 0.7513  | 3.4457 | 3.3831 | 3.5453 | 3.4898 | 3.7479 |
| TCGA-AA-A010 | COAD | stage iib  | Right | 0 | 1 | 1 | 0 | 0 | 0 | AP  | 0.4382  | 3.4080 | 3.2705 | 3.3915 | 1.2596 | 2.6829 |
| TCGA-AA-A017 | COAD | stage iia  | Left  | 0 | 1 | 0 | 0 | 0 | 0 | A   | 0.9822  | 3.4535 | 3.2857 | 3.3706 | 2.7229 | 2.9749 |
| TCGA-AA-A01D | COAD | stage iiic | Left  | 0 | 0 | 1 | 0 | 0 | 1 | PB  | -0.0188 | 3.5202 | 3.2803 | 3.2969 | 1.8453 | 2.5008 |
| TCGA-AA-A01F | COAD | stage iiib | Left  | 0 | 0 | 1 | 1 | 0 | 0 | PK  | 0.8024  | 3.6272 | 3.3475 | 3.4269 | 2.3661 | 2.3794 |
| TCGA-AA-A01G | COAD | stage iia  | Right | 0 | 0 | 1 | 1 | 0 | 0 | PK  | 0.6972  | 3.5342 | 3.3781 | 3.5304 | 3.1578 | 3.3678 |
| TCGA-AA-A01I | COAD | stage i    | Left  | 0 | 1 | 0 | 1 | 0 | 0 | AK  | 0.7704  | 3.6416 | 3.3354 | 3.3815 | 3.1750 | 3.3330 |
| TCGA-AA-A01K | COAD | stage iiic | Left  | 0 | 2 | 1 | 1 | 0 | 0 | APK | 0.6516  | 3.4729 | 3.3130 | 3.3305 | 1.5639 | 2.7064 |
| TCGA-AA-A01P | COAD | stage iii  | Right | 1 | 0 | 0 | 0 | 0 | 1 | B   | 0.3503  | 3.8028 | 3.4805 | 3.3127 | 1.3984 | 1.8538 |
| TCGA-AA-A01Q | COAD | stage ii   | Right | 1 | 1 | 0 | 0 | 0 | 0 | A   | 0.1321  | 3.5003 | 3.2553 | 3.3341 | 0.9659 | 2.1964 |
| TCGA-AA-A01R | COAD | stage iii  | Right | 1 | 2 | 0 | 1 | 0 | 0 | AK  | 0.3567  | 3.5367 | 3.4095 | 3.4952 | 2.0450 | 2.5463 |
| TCGA-AA-A01S | COAD | stage iii  | Left  | 0 | 2 | 1 | 0 | 0 | 0 | AP  | 0.7476  | 3.5554 | 3.4054 | 3.6106 | 2.8920 | 3.0063 |
| TCGA-AA-A01T | COAD | stage iii  | Left  | 0 | 1 | 1 | 0 | 0 | 0 | AP  | 0.8223  | 3.7881 | 3.4232 | 3.4364 | 2.7911 | 3.3624 |



|              |      |            |       |   |   |   |   |   |   |          |         |        |        |        |        |        |
|--------------|------|------------|-------|---|---|---|---|---|---|----------|---------|--------|--------|--------|--------|--------|
| TCGA-AA-A01V | COAD | stage i    | Right | 0 | 1 | 0 | 0 | 1 | 0 | AN       | 0.2730  | 3.5370 | 3.4811 | 3.6592 | 1.6849 | 2.7780 |
| TCGA-AA-A01X | COAD | stage iii  | Left  | 0 | 0 | 0 | 1 | 0 | 0 | K        | 0.3775  | 3.4859 | 3.3711 | 3.4976 | 2.5877 | 2.9751 |
| TCGA-AA-A01Z | COAD | stage ii   | Right | 0 | 1 | 1 | 1 | 0 | 0 | APK      | 0.6548  | 3.6334 | 3.4797 | 3.6612 | 3.0408 | 3.2638 |
| TCGA-AA-A022 | COAD | stage ii   | Right | 1 | 0 | 0 | 0 | 0 | 1 | B        | 0.2198  | 3.5671 | 3.2703 | 3.0761 | 1.2020 | 2.5536 |
| TCGA-AA-A024 | COAD | stage ii   | Left  | 0 | 1 | 0 | 0 | 1 | 0 | AN       | 0.0924  | 3.7792 | 3.4890 | 3.5645 | 2.4695 | 3.3307 |
| TCGA-AA-A029 | COAD | stage ii   | Right | 0 | 1 | 0 | 1 | 0 | 0 | AK       | 0.0936  | 3.9126 | 3.4566 | 3.4702 | 2.4278 | 3.5392 |
| TCGA-AA-A02F | COAD | stage iv   | Left  | 0 | 2 | 1 | 0 | 1 | 0 | APN      | 0.6884  | 3.5962 | 3.3927 | 3.5703 | 2.7733 | 2.7381 |
| TCGA-AA-A02H | COAD | stage iv   | Left  | 0 | 1 | 1 | 0 | 0 | 0 | AP       | 0.8193  | 3.4190 | 3.3445 | 3.5252 | 2.8550 | 3.3599 |
| TCGA-AA-A02J | COAD | stage iv   | Left  | 0 | 2 | 1 | 0 | 0 | 0 | AP       | 0.7396  | 3.3688 | 3.3482 | 3.5997 | 3.5104 | 3.8178 |
| TCGA-AA-A02O | COAD | stage ii   | Right | 0 | 1 | 0 | 1 | 0 | 0 | AK       | 0.2402  | 3.7497 | 3.4947 | 3.5805 | 2.6640 | 3.0567 |
| TCGA-AA-A02W | COAD | stage i    | Left  | 0 | 2 | 1 | 1 | 0 | 0 | APK      | 0.8107  | 3.4211 | 3.3833 | 3.5871 | 3.2901 | 3.4893 |
| TCGA-AA-A02Y | COAD | stage i    | Right | 0 | 0 | 0 | 1 | 0 | 0 | K        | 0.5103  | 3.7891 | 3.4378 | 3.4227 | 1.8901 | 2.7241 |
| TCGA-AA-A03F | COAD | stage iii  | Right | 0 | 2 | 0 | 1 | 0 | 0 | AK       | -0.1259 | 3.6340 | 3.3381 | 3.4203 | 1.4029 | 2.7518 |
| TCGA-AA-A03J | COAD | stage i    | Left  | 0 | 0 | 1 | 1 | 0 | 0 | PK       | 0.6366  | 3.6557 | 3.4074 | 3.5021 | 2.9269 | 3.0061 |
| TCGA-AF-2689 | READ | stage iv   | Left  | 0 | 0 | 1 | 1 | 0 | 0 | PK       | 0.4125  | 3.6632 | 3.2951 | 3.1613 | 2.4075 | 2.8876 |
| TCGA-AF-2691 | READ | stage i    | Left  | 0 | 1 | 1 | 1 | 1 | 0 | APK<br>N | 0.4075  | 3.6491 | 3.3278 | 3.2853 | 2.6327 | 3.0826 |
| TCGA-AF-2692 | READ | stage iia  |       | 0 | 1 | 0 | 1 | 0 | 0 | AK       | 0.2801  | 3.5862 | 3.3557 | 3.3276 | 2.9619 | 3.3730 |
| TCGA-AF-3400 | READ | stage iia  | Left  | 0 | 1 | 1 | 0 | 0 | 0 | AP       | 0.1768  | 3.6167 | 3.3568 | 3.1744 | 2.5858 | 2.9595 |
| TCGA-AF-3913 | READ | stage iv   | Left  | 0 | 1 | 1 | 0 | 1 | 0 | APN      | 0.9588  | 3.5307 | 3.3019 | 3.4342 | 3.2542 | 3.3578 |
| TCGA-AG-3574 | READ | stage ii   | Left  | 0 | 0 | 0 | 0 | 0 | 0 | WT       | 0.6877  | 3.5469 | 3.3663 | 3.5703 | 2.7847 | 3.2863 |
| TCGA-AG-3575 | READ | stage ii   | Left  | 0 | 0 | 1 | 1 | 0 | 0 | PK       | 0.2000  | 3.8440 | 3.6071 | 3.2330 | 2.9552 | 3.0931 |
| TCGA-AG-3578 | READ | stage iia  | Left  | 0 | 0 | 1 | 0 | 0 | 1 | PB       | -0.0379 | 3.5690 | 3.2762 | 3.2775 | 1.3918 | 2.4304 |
| TCGA-AG-3580 | READ | stage i    | Left  | 0 | 1 | 0 | 1 | 0 | 0 | AK       | 0.6137  | 3.4828 | 3.4081 | 3.5143 | 3.1008 | 3.4581 |
| TCGA-AG-3581 | READ | stage i    | Left  | 0 | 1 | 1 | 1 | 0 | 0 | APK      | 0.3877  | 3.5248 | 3.3045 | 3.4152 | 2.7100 | 2.9883 |
| TCGA-AG-3582 | READ | stage iv   | Left  | 0 | 0 | 0 | 0 | 0 | 0 | WT       | 0.8537  | 3.3919 | 3.3436 | 3.4731 | 2.8932 | 3.3661 |
| TCGA-AG-3583 | READ | stage iv   | Left  | 0 | 1 | 0 | 1 | 0 | 0 | AK       | 0.3985  | 3.6298 | 3.3024 | 3.3978 | 2.9075 | 3.1371 |
| TCGA-AG-3584 | READ | stage iv   | Left  | 0 | 1 | 0 | 0 | 0 | 0 | A        | 0.5470  | 3.6232 | 3.2643 | 3.3355 | 2.2979 | 3.1187 |
| TCGA-AG-3586 | READ | stage iii  | Left  | 0 | 1 | 0 | 1 | 0 | 0 | AK       | 0.5253  | 3.5970 | 3.3912 | 3.5475 | 2.9435 | 3.2129 |
| TCGA-AG-3587 | READ | stage i    | Left  | 0 | 2 | 1 | 0 | 0 | 0 | AP       | 0.8975  | 3.5090 | 3.3191 | 3.4336 | 3.2080 | 3.7952 |
| TCGA-AG-3593 | READ | stage iia  | Left  | 0 | 1 | 0 | 0 | 0 | 0 | A        | 0.6936  | 3.3447 | 3.3048 | 3.4882 | 3.3232 | 3.3343 |
| TCGA-AG-3594 | READ | stage iia  | Left  | 0 | 1 | 1 | 1 | 0 | 0 | APK      | -0.2074 | 3.6010 | 3.2855 | 3.2294 | 2.0804 | 2.9703 |
| TCGA-AG-3598 | READ | stage iia  | Left  | 0 | 2 | 1 | 0 | 0 | 0 | AP       | 0.6545  | 3.5633 | 3.3949 | 3.4904 | 3.1046 | 3.2361 |
| TCGA-AG-3599 | READ | stage i    | Left  | 0 | 2 | 0 | 1 | 0 | 0 | AK       | 0.4231  | 3.8316 | 3.4859 | 3.5503 | 2.5844 | 3.6018 |
| TCGA-AG-3600 | READ | stage iiic | Left  | 0 | 0 | 0 | 0 | 0 | 0 | WT       | 0.3594  | 3.6633 | 3.3292 | 3.2112 | 1.2414 | 2.3291 |
| TCGA-AG-3601 | READ | stage iiib | Left  | 0 | 2 | 1 | 0 | 0 | 0 | AP       | 0.9510  | 3.7217 | 3.4120 | 3.4297 | 3.5129 | 2.9657 |
| TCGA-AG-3602 | READ | stage iiic | Left  | 0 | 1 | 1 | 1 | 0 | 0 | APK      | 0.5992  | 4.0347 | 3.5474 | 3.3425 | 3.3131 | 3.3105 |
| TCGA-AG-3605 | READ | stage iv   | Left  | 0 | 1 | 1 | 1 | 0 | 0 | APK      | 0.5991  | 3.5545 | 3.3479 | 3.5586 | 3.0795 | 3.5349 |
| TCGA-AG-3608 | READ | stage iia  | Left  |   | 0 | 1 | 0 | 0 | 0 | P        | 0.5089  | 3.5592 | 3.3437 | 3.5128 | 2.9603 | 3.3068 |
| TCGA-AG-3609 | READ | stage iiic | Left  | 0 | 2 | 1 | 0 | 0 | 0 | AP       | 0.9353  | 3.7393 | 3.4329 | 3.3883 | 2.9458 | 3.5018 |
| TCGA-AG-3611 | READ | stage iia  | Left  | 0 | 1 | 1 | 1 | 0 | 0 | APK      | -0.0325 | 3.7617 | 3.3437 | 3.2500 | 0.7825 | 1.5422 |
| TCGA-AG-3612 | READ | stage iiib | Left  | 0 | 1 | 1 | 0 | 0 | 0 | AP       | 0.8324  | 3.5437 | 3.3427 | 3.4518 | 3.6058 | 3.9062 |
| TCGA-AG-3726 | READ | stage i    | Left  | 0 | 2 | 1 | 1 | 0 | 0 | APK      | 0.8316  | 3.5058 | 3.5761 | 3.8101 | 3.4381 | 3.7468 |
| TCGA-AG-3727 | READ | stage iii  | Left  | 0 | 1 | 0 | 1 | 0 | 0 | AK       | 0.4372  | 3.5287 | 3.4820 | 3.6626 | 1.9785 | 2.5661 |
| TCGA-AG-3878 | READ | stage i    | Left  | 0 | 1 | 0 | 1 | 0 | 0 | AK       | 0.0651  | 3.5939 | 3.5307 | 3.6253 | 2.7924 | 3.0241 |
| TCGA-AG-3881 | READ | stage iia  | Left  | 0 | 1 | 0 | 0 | 0 | 0 | A        | -0.3472 | 3.9791 | 3.6120 | 3.3712 | 1.7872 | 2.5750 |
| TCGA-AG-3882 | READ | stage i    | Left  | 0 | 1 | 1 | 0 | 0 | 0 | AP       | 0.9663  | 3.5289 | 3.3985 | 3.5737 | 2.6928 | 3.0635 |
| TCGA-AG-3883 | READ | stage i    | Left  | 0 | 1 | 0 | 0 | 0 | 0 | A        | 0.6864  | 3.7325 | 3.4913 | 3.4747 | 3.0757 | 3.4318 |
| TCGA-AG-3887 | READ | stage iia  | Left  | 0 | 2 | 0 | 1 | 0 | 0 | AK       | 0.4629  | 3.5174 | 3.3840 | 3.5445 | 2.9733 | 2.7829 |
| TCGA-AG-3890 | READ | stage i    | Left  | 0 | 1 | 1 | 0 | 0 | 0 | AP       | 0.6848  | 3.3652 | 3.3332 | 3.5120 | 2.7936 | 3.3134 |

|              |      |            |       |   |   |   |   |   |   |     |        |        |        |        |        |        |
|--------------|------|------------|-------|---|---|---|---|---|---|-----|--------|--------|--------|--------|--------|--------|
| TCGA-AG-3892 | READ | stage i    | Left  | 0 | 1 | 0 | 1 | 1 | 0 | AKN | 0.4628 | 3.7738 | 3.4685 | 3.4502 | 2.3822 | 3.3106 |
| TCGA-AG-3893 | READ | stage iiib | Left  | 0 | 1 | 1 | 0 | 0 | 0 | AP  | 0.5921 | 3.4925 | 3.2786 | 3.3439 | 2.5615 | 3.2651 |
| TCGA-AG-3894 | READ | stage iia  | Left  | 0 | 1 | 0 | 0 | 1 | 0 | AN  | 0.6334 | 3.6595 | 3.4658 | 3.5796 | 2.6081 | 3.1479 |
| TCGA-AG-3896 | READ | stage i    | Left  | 0 | 1 | 1 | 1 | 0 | 0 | APK | 0.6334 | 3.5301 | 3.3429 | 3.4777 | 2.3603 | 2.6899 |
| TCGA-AG-3898 | READ | stage iia  | Left  | 0 | 2 | 1 | 0 | 0 | 0 | AP  | 0.8237 | 3.5407 | 3.4006 | 3.4839 | 3.1882 | 3.1914 |
| TCGA-AG-3901 | READ | stage iiib | Left  | 0 | 1 | 0 | 1 | 0 | 0 | AK  | 0.1956 | 3.4925 | 3.3739 | 3.3846 | 2.7081 | 2.9611 |
| TCGA-AG-3902 | READ | stage iia  | Left  | 0 | 1 | 1 | 1 | 0 | 0 | APK | 0.4845 | 3.6578 | 3.4322 | 3.5504 | 3.2886 | 3.6830 |
| TCGA-AG-3909 | READ | stage iiib | Left  | 0 | 2 | 1 | 1 | 0 | 0 | APK | 0.6416 | 3.6681 | 3.3137 | 3.4060 | 3.1633 | 3.2779 |
| TCGA-AG-3999 | READ | stage iiic | Left  | 0 | 1 | 1 | 1 | 0 | 0 | APK | 0.6952 | 3.6841 | 3.4518 | 3.5256 | 2.5064 | 3.1931 |
| TCGA-AG-4001 | READ | stage iia  | Left  | 0 | 1 | 1 | 0 | 0 | 0 | AP  | 0.8955 | 3.4113 | 3.3463 | 3.4024 | 3.5576 | 3.3425 |
| TCGA-AG-4005 | READ | stage iv   | Left  | 0 | 2 | 1 | 1 | 0 | 0 | APK | 0.5875 | 3.5834 | 3.3926 | 3.4693 | 2.5778 | 2.9000 |
| TCGA-AG-4007 | READ | stage iv   | Left  | 0 | 2 | 1 | 0 | 0 | 0 | AP  | 0.7710 | 3.6457 | 3.3796 | 3.4590 | 3.0259 | 3.4257 |
| TCGA-AG-4008 | READ | stage iia  | Left  | 0 | 0 | 1 | 1 | 0 | 0 | PK  | 0.5753 | 3.4791 | 3.4040 | 3.4876 | 2.9685 | 3.3920 |
| TCGA-AG-4015 | READ | stage iia  | Left  | 0 | 1 | 1 | 0 | 0 | 0 | AP  | 0.7860 | 3.5235 | 3.3190 | 3.4595 | 3.1189 | 3.4116 |
| TCGA-AG-A002 | READ | stage i    | Left  | 0 | 2 | 0 | 0 | 0 | 0 | A   | 0.3779 | 3.5688 | 3.3228 | 3.2922 | 0.6661 | 2.9477 |
| TCGA-AG-A008 | READ | stage i    | Left  | 0 | 1 | 0 | 1 | 0 | 0 | AK  | 0.1713 | 3.5055 | 3.3887 | 3.5236 | 1.8507 | 2.7382 |
| TCGA-AG-A00C | READ | stage iiib | Left  | 0 | 2 | 1 | 1 | 0 | 0 | APK | 0.9339 | 3.4948 | 3.3489 | 3.5136 | 3.1079 | 3.3604 |
| TCGA-AG-A00H | READ | stage iia  | Left  | 0 | 0 | 0 | 1 | 0 | 0 | K   | 0.9103 | 3.5929 | 3.4003 | 3.4005 | 2.9660 | 3.2990 |
| TCGA-AG-A00Y | READ | stage iia  | Left  | 0 | 0 | 1 | 1 | 0 | 0 | PK  | 0.7136 | 3.5265 | 3.4051 | 3.5552 | 2.4577 | 2.5962 |
| TCGA-AG-A011 | READ | stage iia  | Left  | 0 | 2 | 1 | 0 | 0 | 0 | AP  | 0.4748 | 3.3695 | 3.2423 | 3.4006 | 3.4183 | 3.8780 |
| TCGA-AG-A014 | READ | stage i    | Left  | 0 | 1 | 1 | 1 | 0 | 0 | APK | 0.7722 | 3.4382 | 3.3078 | 3.4193 | 1.7969 | 2.2637 |
| TCGA-AG-A015 | READ | stage i    | Left  | 0 | 1 | 0 | 1 | 0 | 0 | AK  | 0.4856 | 3.5912 | 3.3510 | 3.4711 | 2.4623 | 2.6449 |
| TCGA-AG-A016 | READ | stage iv   | Left  | 0 | 0 | 1 | 0 | 0 | 0 | P   | 0.8667 | 3.4054 | 3.3011 | 3.5177 | 3.2846 | 3.3431 |
| TCGA-AG-A01J | READ | stage iia  | Left  | 0 | 1 | 1 | 0 | 1 | 0 | APN | 0.7126 | 3.6207 | 3.3191 | 3.4461 | 3.5787 | 3.5502 |
| TCGA-AG-A01W | READ | stage ii   | Left  | 0 | 1 | 1 | 1 | 0 | 0 | APK | 0.5959 | 3.5030 | 3.3008 | 3.4170 | 3.0216 | 3.1799 |
| TCGA-AG-A01Y | READ | stage ii   | Left  | 0 | 1 | 1 | 0 | 0 | 0 | AP  | 0.5544 | 3.4215 | 3.4106 | 3.5797 | 3.2991 | 3.3252 |
| TCGA-AG-A020 | READ | stage iii  | Left  | 0 | 2 | 1 | 1 | 0 | 0 | APK | 0.0406 | 3.4899 | 3.2900 | 3.4140 | 2.7693 | 3.4371 |
| TCGA-AG-A025 | READ | stage i    | Left  | 0 | 1 | 0 | 1 | 0 | 0 | AK  | 0.7388 | 3.5939 | 3.5091 | 3.7324 | 3.1116 | 3.3955 |
| TCGA-AG-A026 | READ | stage ii   | Left  | 0 | 1 | 1 | 0 | 0 | 0 | AP  | 0.8353 | 3.5843 | 3.4555 | 3.5879 | 3.4314 | 3.6139 |
| TCGA-AG-A02G | READ | stage iv   | Left  | 0 | 1 | 0 | 0 | 0 | 0 | A   | 0.6571 | 3.4016 | 3.2961 | 3.5148 | 2.9083 | 3.0708 |
| TCGA-AG-A02N | READ | stage ii   | Left  | 1 | 2 | 1 | 1 | 0 | 0 | APK | 0.1378 | 3.5677 | 3.2939 | 3.3457 | 2.4471 | 2.7588 |
| TCGA-AG-A02X | READ | stage i    | Left  | 0 | 1 | 1 | 1 | 0 | 0 | APK | 0.1729 | 3.5474 | 3.3261 | 3.4385 | 1.2070 | 2.8748 |
| TCGA-AG-A032 | READ | stage iiib | Left  | 0 | 2 | 1 | 1 | 0 | 0 | APK | 0.7742 | 3.7370 | 3.4343 | 3.4782 | 2.8326 | 3.0601 |
| TCGA-AG-A036 | READ | stage iii  | Left  | 0 | 2 | 1 | 0 | 0 | 0 | AP  | 0.7179 | 3.4409 | 3.3127 | 3.4626 | 3.4216 | 3.4173 |
| TCGA-AY-4070 | COAD | stage iiic | Right | 0 | 0 | 1 | 0 | 0 | 0 | P   | 0.5640 | 3.5292 | 3.3423 | 3.4039 | 2.5353 | 2.8855 |
| TCGA-AY-4071 | COAD | stage i    |       | 0 | 1 | 1 | 0 | 0 | 0 | AP  | 0.9928 | 3.5689 | 3.2325 | 3.2959 | 3.1625 | 3.2889 |
| TCGA-3L-AA1B | COAD |            |       |   |   |   |   |   |   |     | 0.5473 | 3.5399 | 3.4299 | 3.6193 | 3.1647 | 3.3496 |
| TCGA-4N-A93T | COAD |            |       |   |   |   |   |   |   |     | 0.8340 | 3.7867 | 3.3797 | 3.3464 | 1.2032 | 2.2932 |
| TCGA-4T-AA8H | COAD |            |       |   |   |   |   |   |   |     | 0.6261 | 3.7493 | 3.3923 | 3.3609 | 2.5201 | 2.7391 |
| TCGA-5M-AAT4 | COAD |            |       |   |   |   |   |   |   |     | 0.7540 | 3.6991 | 3.4643 | 3.5430 | 3.1370 | 3.4801 |
| TCGA-5M-AAT5 | COAD |            |       |   |   |   |   |   |   |     | 0.7838 | 3.7084 | 3.4787 | 3.5754 | 3.4378 | 3.5379 |
| TCGA-5M-AAT6 | COAD |            |       |   |   |   |   |   |   |     | 0.1480 | 3.6021 | 3.4101 | 3.3075 | 2.7511 | 2.4674 |
| TCGA-5M-AATA | COAD |            |       |   |   |   |   |   |   |     | 0.6783 | 3.5807 | 3.4068 | 3.4702 | 3.9096 | 3.8469 |
| TCGA-5M-AATE | COAD |            |       |   |   |   |   |   |   |     | 0.7403 | 3.5662 | 3.4067 | 3.5461 | 3.1428 | 3.0182 |
| TCGA-A6-2671 | COAD |            |       |   |   |   |   |   |   |     | 0.5323 | 3.5586 | 3.3490 | 3.3930 | 3.1119 | 3.3294 |
| TCGA-A6-2675 | COAD |            |       |   |   |   |   |   |   |     | 0.4301 | 3.5327 | 3.3449 | 3.2847 | 2.5213 | 2.4448 |
| TCGA-A6-2679 | COAD |            |       |   |   |   |   |   |   |     | 0.5248 | 3.6740 | 3.3147 | 3.2404 | 2.0877 | 2.4510 |
| TCGA-A6-2680 | COAD |            |       |   |   |   |   |   |   |     | 0.3302 | 3.6256 | 3.3226 | 3.3509 | 2.8252 | 2.8719 |
| TCGA-A6-2681 | COAD |            |       |   |   |   |   |   |   |     | 0.6484 | 3.5218 | 3.3720 | 3.4763 | 2.8737 | 3.2802 |
| TCGA-A6-2682 | COAD |            |       |   |   |   |   |   |   |     | 0.5634 | 3.6846 | 3.3476 | 3.3339 | 2.9286 | 3.0980 |
| TCGA-A6-2684 | COAD |            |       |   |   |   |   |   |   |     | 0.5971 | 3.6515 | 3.3883 | 3.3816 | 2.7727 | 2.8604 |

|              |      |  |  |  |  |  |  |  |  |  |  |         |        |        |        |        |        |
|--------------|------|--|--|--|--|--|--|--|--|--|--|---------|--------|--------|--------|--------|--------|
| TCGA-A6-2685 | COAD |  |  |  |  |  |  |  |  |  |  | 0.4170  | 3.6962 | 3.3941 | 3.3534 | 3.2953 | 3.1955 |
| TCGA-A6-2686 | COAD |  |  |  |  |  |  |  |  |  |  | 0.4459  | 3.6509 | 3.2734 | 3.1645 | 1.6668 | 2.4061 |
| TCGA-A6-3809 | COAD |  |  |  |  |  |  |  |  |  |  | 0.4192  | 3.5696 | 3.3425 | 3.3821 | 2.8464 | 3.0648 |
| TCGA-A6-4105 | COAD |  |  |  |  |  |  |  |  |  |  | 0.6544  | 3.6042 | 3.4384 | 3.5277 | 3.4743 | 3.5507 |
| TCGA-A6-4107 | COAD |  |  |  |  |  |  |  |  |  |  | 0.6369  | 3.7608 | 3.4863 | 3.4606 | 2.8438 | 2.7963 |
| TCGA-A6-5656 | COAD |  |  |  |  |  |  |  |  |  |  | 0.9951  | 3.5207 | 3.3421 | 3.4850 | 3.2401 | 3.4699 |
| TCGA-A6-5657 | COAD |  |  |  |  |  |  |  |  |  |  | 0.5483  | 3.6805 | 3.5360 | 3.4980 | 3.3281 | 3.5440 |
| TCGA-A6-5659 | COAD |  |  |  |  |  |  |  |  |  |  | 0.7014  | 3.5734 | 3.3348 | 3.3822 | 3.2620 | 3.4316 |
| TCGA-A6-5660 | COAD |  |  |  |  |  |  |  |  |  |  | 0.8422  | 3.6355 | 3.4131 | 3.4895 | 3.2168 | 2.9725 |
| TCGA-A6-5661 | COAD |  |  |  |  |  |  |  |  |  |  | 0.3773  | 3.7704 | 3.4028 | 3.3002 | 2.5538 | 3.2263 |
| TCGA-A6-5662 | COAD |  |  |  |  |  |  |  |  |  |  | 0.5799  | 3.5772 | 3.2880 | 3.2341 | 3.0789 | 2.9233 |
| TCGA-A6-5664 | COAD |  |  |  |  |  |  |  |  |  |  | 0.3939  | 3.6073 | 3.4891 | 3.5035 | 2.5767 | 3.1611 |
| TCGA-A6-5665 | COAD |  |  |  |  |  |  |  |  |  |  | 0.3955  | 3.8046 | 3.3915 | 3.2233 | 2.2329 | 2.8307 |
| TCGA-A6-5666 | COAD |  |  |  |  |  |  |  |  |  |  | 0.7513  | 3.7187 | 3.4913 | 3.5997 | 3.5003 | 3.6861 |
| TCGA-A6-5667 | COAD |  |  |  |  |  |  |  |  |  |  | 0.6801  | 3.5784 | 3.3124 | 3.3547 | 3.3249 | 3.2146 |
| TCGA-A6-6137 | COAD |  |  |  |  |  |  |  |  |  |  | 0.7918  | 3.4904 | 3.4050 | 3.5633 | 3.0358 | 3.1869 |
| TCGA-A6-6138 | COAD |  |  |  |  |  |  |  |  |  |  | 0.7679  | 3.5195 | 3.3611 | 3.4414 | 3.5731 | 3.6430 |
| TCGA-A6-6140 | COAD |  |  |  |  |  |  |  |  |  |  | 0.8765  | 3.4419 | 3.3438 | 3.5157 | 3.3364 | 3.0285 |
| TCGA-A6-6141 | COAD |  |  |  |  |  |  |  |  |  |  | 0.2717  | 3.5918 | 3.3839 | 3.4695 | 2.4393 | 2.7305 |
| TCGA-A6-6142 | COAD |  |  |  |  |  |  |  |  |  |  | 0.9452  | 3.5358 | 3.5055 | 3.5226 | 3.4204 | 3.4765 |
| TCGA-A6-6648 | COAD |  |  |  |  |  |  |  |  |  |  | 0.5309  | 3.4322 | 3.3973 | 3.5841 | 3.5926 | 3.1904 |
| TCGA-A6-6649 | COAD |  |  |  |  |  |  |  |  |  |  | 0.1760  | 3.6827 | 3.3686 | 3.2254 | 2.2854 | 2.4918 |
| TCGA-A6-6650 | COAD |  |  |  |  |  |  |  |  |  |  | 0.8386  | 3.4710 | 3.2592 | 3.4137 | 3.5339 | 3.1694 |
| TCGA-A6-6651 | COAD |  |  |  |  |  |  |  |  |  |  | 0.5197  | 3.3519 | 3.3385 | 3.2824 | 2.6289 | 3.1901 |
| TCGA-A6-6652 | COAD |  |  |  |  |  |  |  |  |  |  | 0.7026  | 3.4653 | 3.4478 | 3.6278 | 3.4345 | 3.6064 |
| TCGA-A6-6653 | COAD |  |  |  |  |  |  |  |  |  |  | 0.3057  | 3.6108 | 3.3733 | 3.4033 | 1.4105 | 2.3189 |
| TCGA-A6-6654 | COAD |  |  |  |  |  |  |  |  |  |  | 0.6744  | 3.5346 | 3.5967 | 3.5034 | 2.6188 | 2.4864 |
| TCGA-A6-6780 | COAD |  |  |  |  |  |  |  |  |  |  | 0.5536  | 3.5603 | 3.2835 | 3.2574 | 2.7397 | 2.7629 |
| TCGA-A6-6781 | COAD |  |  |  |  |  |  |  |  |  |  | -0.0559 | 3.6441 | 3.4688 | 3.1500 | 1.3698 | 2.5524 |
| TCGA-A6-6782 | COAD |  |  |  |  |  |  |  |  |  |  | 0.9206  | 3.5559 | 3.3666 | 3.4418 | 3.2199 | 3.3337 |
| TCGA-A6-A565 | COAD |  |  |  |  |  |  |  |  |  |  | 0.2126  | 3.7662 | 3.4055 | 3.1154 | 1.8373 | 2.9175 |
| TCGA-A6-A566 | COAD |  |  |  |  |  |  |  |  |  |  | 0.3702  | 3.5470 | 3.3832 | 3.2221 | 3.0827 | 2.6400 |
| TCGA-A6-A567 | COAD |  |  |  |  |  |  |  |  |  |  | 0.6876  | 3.5319 | 3.3727 | 3.4253 | 2.9107 | 3.1003 |
| TCGA-A6-A56B | COAD |  |  |  |  |  |  |  |  |  |  | 0.7503  | 3.5948 | 3.4367 | 3.4743 | 3.5602 | 3.7406 |
| TCGA-A6-A5ZU | COAD |  |  |  |  |  |  |  |  |  |  | 0.7944  | 3.5432 | 3.3717 | 3.4288 | 2.9221 | 3.0516 |
| TCGA-AA-3488 | COAD |  |  |  |  |  |  |  |  |  |  | 0.8361  | 3.5268 | 3.3186 | 3.4706 | 2.7514 | 3.3715 |
| TCGA-AA-3489 | COAD |  |  |  |  |  |  |  |  |  |  | 0.4487  | 3.5533 | 3.3283 | 3.2217 | 3.0129 | 3.2622 |
| TCGA-AA-3492 | COAD |  |  |  |  |  |  |  |  |  |  | 0.3718  | 3.7024 | 3.3160 | 3.3550 | 1.5963 | 2.7957 |
| TCGA-AA-3494 | COAD |  |  |  |  |  |  |  |  |  |  | 0.8468  | 3.4507 | 3.3490 | 3.5016 | 3.5277 | 3.9083 |
| TCGA-AA-3495 | COAD |  |  |  |  |  |  |  |  |  |  | 0.7566  | 3.6102 | 3.3289 | 3.4052 | 3.2207 | 3.3155 |
| TCGA-AA-3496 | COAD |  |  |  |  |  |  |  |  |  |  | 0.5819  | 3.4350 | 3.2945 | 3.2944 | 1.5779 | 2.1966 |
| TCGA-AA-3502 | COAD |  |  |  |  |  |  |  |  |  |  | 0.0293  | 3.7330 | 3.4018 | 3.3724 | 1.0088 | 2.1926 |
| TCGA-AA-3506 | COAD |  |  |  |  |  |  |  |  |  |  | 0.4934  | 3.6680 | 3.4094 | 3.4827 | 2.2331 | 2.7960 |
| TCGA-AA-3509 | COAD |  |  |  |  |  |  |  |  |  |  | 0.6525  | 3.6948 | 3.4017 | 3.4683 | 1.4772 | 1.9412 |
| TCGA-AA-3510 | COAD |  |  |  |  |  |  |  |  |  |  | 0.3651  | 3.4963 | 3.3823 | 3.5752 | 1.1518 | 2.8157 |
| TCGA-AA-3511 | COAD |  |  |  |  |  |  |  |  |  |  | 0.4971  | 3.6278 | 3.2950 | 3.2338 | 3.2211 | 3.1912 |
| TCGA-AA-3655 | COAD |  |  |  |  |  |  |  |  |  |  | 0.3985  | 3.6691 | 3.3034 | 3.2658 | 3.0241 | 2.9670 |
| TCGA-AA-3660 | COAD |  |  |  |  |  |  |  |  |  |  | 0.3887  | 3.6504 | 3.3142 | 3.3324 | 2.4317 | 2.7245 |
| TCGA-AA-3662 | COAD |  |  |  |  |  |  |  |  |  |  | 0.4028  | 3.6146 | 3.2922 | 3.3185 | 2.8496 | 2.9558 |

|              |      |  |  |  |  |  |  |  |  |  |  |        |        |        |        |        |        |
|--------------|------|--|--|--|--|--|--|--|--|--|--|--------|--------|--------|--------|--------|--------|
| TCGA-AA-3663 | COAD |  |  |  |  |  |  |  |  |  |  | 0.2382 | 3.7522 | 3.3732 | 3.3026 | 1.7159 | 2.5555 |
| TCGA-AA-3675 | COAD |  |  |  |  |  |  |  |  |  |  | 0.6102 | 3.8737 | 3.5692 | 3.5492 | 2.7437 | 2.6595 |
| TCGA-AA-3697 | COAD |  |  |  |  |  |  |  |  |  |  | 0.6504 | 3.7197 | 3.3714 | 3.2568 | 3.3945 | 3.3589 |
| TCGA-AA-3712 | COAD |  |  |  |  |  |  |  |  |  |  | 0.4512 | 3.6128 | 3.3534 | 3.3241 | 2.6869 | 3.0296 |
| TCGA-AA-3713 | COAD |  |  |  |  |  |  |  |  |  |  | 0.2639 | 3.7312 | 3.2774 | 3.1299 | 2.2985 | 3.0416 |
| TCGA-AA-3815 | COAD |  |  |  |  |  |  |  |  |  |  | 0.3547 | 3.3388 | 3.3142 | 3.4365 | 1.3867 | 2.3867 |
| TCGA-AA-3841 | COAD |  |  |  |  |  |  |  |  |  |  | 0.5922 | 3.5142 | 3.3448 | 3.4412 | 2.1134 | 2.4510 |
| TCGA-AA-3861 | COAD |  |  |  |  |  |  |  |  |  |  | 0.3020 | 3.7161 | 3.3848 | 3.4163 | 1.6816 | 2.4802 |
| TCGA-AA-3862 | COAD |  |  |  |  |  |  |  |  |  |  | 0.5707 | 3.5637 | 3.2387 | 3.2646 | 2.7014 | 3.0648 |
| TCGA-AA-3950 | COAD |  |  |  |  |  |  |  |  |  |  | 0.3288 | 3.5122 | 3.2849 | 3.2264 | 2.1948 | 2.3872 |
| TCGA-AA-3968 | COAD |  |  |  |  |  |  |  |  |  |  | 0.6955 | 3.4114 | 3.2958 | 3.3910 | 3.2227 | 3.0976 |
| TCGA-AA-3970 | COAD |  |  |  |  |  |  |  |  |  |  | 0.5507 | 3.5914 | 3.3600 | 3.4769 | 4.0565 | 3.8944 |
| TCGA-AA-A01C | COAD |  |  |  |  |  |  |  |  |  |  | 0.8696 | 3.5047 | 3.3746 | 3.5299 | 2.7868 | 2.9810 |
| TCGA-AA-A02E | COAD |  |  |  |  |  |  |  |  |  |  | 0.7082 | 3.5806 | 3.3682 | 3.4754 | 2.1361 | 3.2788 |
| TCGA-AA-A02K | COAD |  |  |  |  |  |  |  |  |  |  | 0.7413 | 3.5519 | 3.2832 | 3.4109 | 2.9242 | 3.0725 |
| TCGA-AA-A02R | COAD |  |  |  |  |  |  |  |  |  |  | 0.1625 | 3.4337 | 3.2958 | 3.2234 | 0.5354 | 2.1094 |
| TCGA-AD-5900 | COAD |  |  |  |  |  |  |  |  |  |  | 0.0984 | 3.5582 | 3.3152 | 3.2484 | 0.7941 | 2.1682 |
| TCGA-AD-6548 | COAD |  |  |  |  |  |  |  |  |  |  | 0.6727 | 3.5990 | 3.4985 | 3.5968 | 3.3640 | 3.5395 |
| TCGA-AD-6888 | COAD |  |  |  |  |  |  |  |  |  |  | 0.8359 | 3.7773 | 3.4767 | 3.4296 | 3.0839 | 3.0996 |
| TCGA-AD-6889 | COAD |  |  |  |  |  |  |  |  |  |  | 0.4755 | 3.9360 | 3.5671 | 3.4760 | 1.4169 | 2.9218 |
| TCGA-AD-6890 | COAD |  |  |  |  |  |  |  |  |  |  | 0.7641 | 3.6517 | 3.4692 | 3.5974 | 3.3939 | 3.4868 |
| TCGA-AD-6895 | COAD |  |  |  |  |  |  |  |  |  |  | 0.3763 | 3.9117 | 3.5464 | 3.3452 | 2.0489 | 3.0855 |
| TCGA-AD-6899 | COAD |  |  |  |  |  |  |  |  |  |  | 0.7184 | 3.5306 | 3.4093 | 3.4008 | 2.6494 | 2.9299 |
| TCGA-AD-6901 | COAD |  |  |  |  |  |  |  |  |  |  | 0.6841 | 3.7280 | 3.5372 | 3.5454 | 2.8063 | 2.8622 |
| TCGA-AD-6963 | COAD |  |  |  |  |  |  |  |  |  |  | 0.8408 | 3.6402 | 3.3963 | 3.4125 | 3.4922 | 3.2511 |
| TCGA-AD-6964 | COAD |  |  |  |  |  |  |  |  |  |  | 0.3941 | 3.4883 | 3.3376 | 3.3253 | 1.1286 | 1.8690 |
| TCGA-AD-6965 | COAD |  |  |  |  |  |  |  |  |  |  | 0.6772 | 3.5824 | 3.3844 | 3.5439 | 2.8932 | 3.0349 |
| TCGA-AD-A5EJ | COAD |  |  |  |  |  |  |  |  |  |  | 0.1048 | 3.7628 | 3.4492 | 3.2353 | 1.1350 | 2.4337 |
| TCGA-AD-A5EK | COAD |  |  |  |  |  |  |  |  |  |  | 0.6545 | 3.4011 | 3.4002 | 3.6253 | 3.8653 | 3.9724 |
| TCGA-AF-2687 | READ |  |  |  |  |  |  |  |  |  |  | 0.5884 | 3.4097 | 3.3948 | 3.3153 | 2.9836 | 3.2738 |
| TCGA-AF-2690 | READ |  |  |  |  |  |  |  |  |  |  | 0.6062 | 3.4649 | 3.3816 | 3.4353 | 2.8529 | 2.8383 |
| TCGA-AF-2693 | READ |  |  |  |  |  |  |  |  |  |  | 0.7353 | 3.7660 | 3.4153 | 3.4211 | 2.4813 | 3.0512 |
| TCGA-AF-3911 | READ |  |  |  |  |  |  |  |  |  |  | 0.8174 | 3.6348 | 3.4042 | 3.4426 | 3.5326 | 3.6132 |
| TCGA-AF-4110 | READ |  |  |  |  |  |  |  |  |  |  | 0.4239 | 3.6945 | 3.4075 | 3.3918 | 2.4500 | 2.5741 |
| TCGA-AF-5654 | READ |  |  |  |  |  |  |  |  |  |  | 0.7257 | 3.6913 | 3.3703 | 3.3433 | 2.1925 | 2.9084 |
| TCGA-AF-6136 | READ |  |  |  |  |  |  |  |  |  |  | 0.4896 | 3.7183 | 3.3211 | 3.2507 | 1.7665 | 2.1013 |
| TCGA-AF-6655 | READ |  |  |  |  |  |  |  |  |  |  | 0.7307 | 3.5214 | 3.4698 | 3.5435 | 3.4311 | 3.5711 |
| TCGA-AF-6672 | READ |  |  |  |  |  |  |  |  |  |  | 0.1099 | 3.7876 | 3.5095 | 3.5728 | 1.5118 | 2.8337 |
| TCGA-AF-A56K | READ |  |  |  |  |  |  |  |  |  |  | 0.7999 | 3.4824 | 3.4297 | 3.5480 | 3.2723 | 3.2668 |
| TCGA-AF-A56L | READ |  |  |  |  |  |  |  |  |  |  | 0.8192 | 3.5444 | 3.4096 | 3.5339 | 3.5786 | 3.4346 |
| TCGA-AF-A56N | READ |  |  |  |  |  |  |  |  |  |  | 0.8459 | 3.5389 | 3.4322 | 3.5252 | 3.6060 | 3.7100 |
| TCGA-AG-3591 | READ |  |  |  |  |  |  |  |  |  |  | 0.1342 | 3.9996 | 3.5608 | 3.3301 | 1.8786 | 2.8123 |
| TCGA-AG-3592 | READ |  |  |  |  |  |  |  |  |  |  | 0.8686 | 3.4548 | 3.3489 | 3.4617 | 3.1881 | 3.3204 |
| TCGA-AG-3725 | READ |  |  |  |  |  |  |  |  |  |  | 0.4947 | 3.8078 | 3.3699 | 3.2576 | 1.9982 | 2.4343 |
| TCGA-AG-3728 | READ |  |  |  |  |  |  |  |  |  |  | 0.4967 | 3.4550 | 3.3479 | 3.4083 | 2.3694 | 2.6429 |
| TCGA-AG-3731 | READ |  |  |  |  |  |  |  |  |  |  | 0.3349 | 3.5058 | 3.3100 | 3.2936 | 3.0747 | 3.2686 |
| TCGA-AG-3732 | READ |  |  |  |  |  |  |  |  |  |  | 0.1787 | 3.3610 | 3.2343 | 3.1987 | 1.6663 | 2.2737 |
| TCGA-AG-3742 | READ |  |  |  |  |  |  |  |  |  |  | 0.5142 | 3.5584 | 3.3087 | 3.2847 | 3.4286 | 3.5354 |
| TCGA-AG-3885 | READ |  |  |  |  |  |  |  |  |  |  | 0.4623 | 3.6082 | 3.3432 | 3.4579 | 1.2233 | 2.1154 |
| TCGA-AG-4021 | READ |  |  |  |  |  |  |  |  |  |  | 0.7909 | 3.6112 | 3.4152 | 3.4568 | 3.8707 | 3.7874 |
| TCGA-AG-4022 | READ |  |  |  |  |  |  |  |  |  |  | 0.6797 | 3.5902 | 3.3548 | 3.4084 | 3.3420 | 3.0301 |

|              |      |  |  |  |  |  |  |  |  |  |         |        |        |        |        |        |
|--------------|------|--|--|--|--|--|--|--|--|--|---------|--------|--------|--------|--------|--------|
| TCGA-AG-A01L | READ |  |  |  |  |  |  |  |  |  | 0.5477  | 3.6337 | 3.3362 | 3.4878 | 2.5449 | 2.4578 |
| TCGA-AG-A01N | READ |  |  |  |  |  |  |  |  |  | 0.7851  | 3.5500 | 3.2963 | 3.4253 | 3.6544 | 3.4987 |
| TCGA-AG-A023 | READ |  |  |  |  |  |  |  |  |  | 0.7360  | 3.5517 | 3.4705 | 3.6759 | 2.1799 | 2.8441 |
| TCGA-AH-6544 | READ |  |  |  |  |  |  |  |  |  | 0.6657  | 3.7589 | 3.4443 | 3.4514 | 2.5872 | 2.8920 |
| TCGA-AH-6547 | READ |  |  |  |  |  |  |  |  |  | 0.2102  | 3.5803 | 3.3021 | 3.2483 | 2.8650 | 3.2090 |
| TCGA-AH-6549 | READ |  |  |  |  |  |  |  |  |  | 0.8160  | 3.5372 | 3.4208 | 3.4497 | 2.9847 | 3.4626 |
| TCGA-AH-6643 | READ |  |  |  |  |  |  |  |  |  | 0.5209  | 3.6380 | 3.3666 | 3.3221 | 2.8622 | 2.7561 |
| TCGA-AH-6644 | READ |  |  |  |  |  |  |  |  |  | 0.6204  | 3.6098 | 3.4933 | 3.5652 | 3.9128 | 3.7619 |
| TCGA-AH-6897 | READ |  |  |  |  |  |  |  |  |  | 0.9152  | 3.5865 | 3.3802 | 3.3974 | 3.1374 | 3.7077 |
| TCGA-AH-6903 | READ |  |  |  |  |  |  |  |  |  | 0.5676  | 3.5700 | 3.3941 | 3.5381 | 3.3765 | 3.2801 |
| TCGA-AM-5820 | COAD |  |  |  |  |  |  |  |  |  | 0.5817  | 3.8357 | 3.4262 | 3.3872 | 3.0537 | 3.2975 |
| TCGA-AM-5821 | COAD |  |  |  |  |  |  |  |  |  | 0.4277  | 3.9371 | 3.6409 | 3.2813 | 3.7803 | 3.6259 |
| TCGA-AU-3779 | COAD |  |  |  |  |  |  |  |  |  | 0.9623  | 3.6395 | 3.3595 | 3.3521 | 2.9618 | 3.0292 |
| TCGA-AU-6004 | COAD |  |  |  |  |  |  |  |  |  | 0.3479  | 3.6766 | 3.4156 | 3.3456 | 2.4456 | 2.8890 |
| TCGA-AY-5543 | COAD |  |  |  |  |  |  |  |  |  | 0.8712  | 3.7583 | 3.4430 | 3.5397 | 3.4470 | 3.5918 |
| TCGA-AY-6196 | COAD |  |  |  |  |  |  |  |  |  | 0.2536  | 3.4452 | 3.2901 | 3.1515 | 1.3804 | 2.0189 |
| TCGA-AY-6197 | COAD |  |  |  |  |  |  |  |  |  | 0.3978  | 3.6090 | 3.4613 | 3.5282 | 2.7561 | 3.2109 |
| TCGA-AY-6386 | COAD |  |  |  |  |  |  |  |  |  | 0.5616  | 3.7005 | 3.4248 | 3.4384 | 2.8268 | 2.9242 |
| TCGA-AY-A54L | COAD |  |  |  |  |  |  |  |  |  | 0.5833  | 3.7632 | 3.4532 | 3.5188 | 3.6215 | 3.7470 |
| TCGA-AY-A69D | COAD |  |  |  |  |  |  |  |  |  | 0.7061  | 3.6010 | 3.4513 | 3.5527 | 2.8330 | 3.4658 |
| TCGA-AY-A71X | COAD |  |  |  |  |  |  |  |  |  | 0.0500  | 3.8590 | 3.4975 | 3.4575 | 1.1162 | 2.4757 |
| TCGA-AY-A8YK | COAD |  |  |  |  |  |  |  |  |  | 0.8256  | 3.5509 | 3.3312 | 3.4025 | 3.3119 | 3.3651 |
| TCGA-AZ-4308 | COAD |  |  |  |  |  |  |  |  |  | 0.6607  | 3.7137 | 3.4337 | 3.3673 | 2.5369 | 2.8235 |
| TCGA-AZ-4313 | COAD |  |  |  |  |  |  |  |  |  | 0.0073  | 3.7954 | 3.3813 | 3.1985 | 1.5323 | 2.7743 |
| TCGA-AZ-4315 | COAD |  |  |  |  |  |  |  |  |  | 0.5591  | 3.9593 | 3.4374 | 3.3231 | 2.7491 | 2.9577 |
| TCGA-AZ-4323 | COAD |  |  |  |  |  |  |  |  |  | 0.3356  | 3.2717 | 3.1972 | 2.9741 | 0.9793 | 1.9436 |
| TCGA-AZ-4614 | COAD |  |  |  |  |  |  |  |  |  | 0.5011  | 3.6853 | 3.3918 | 3.2864 | 2.1499 | 2.4020 |
| TCGA-AZ-4615 | COAD |  |  |  |  |  |  |  |  |  | 0.3212  | 3.7470 | 3.3810 | 3.2961 | 0.8312 | 2.1247 |
| TCGA-AZ-4616 | COAD |  |  |  |  |  |  |  |  |  | 0.6014  | 3.8483 | 3.5285 | 3.3945 | 2.7276 | 2.8519 |
| TCGA-AZ-4681 | COAD |  |  |  |  |  |  |  |  |  | 0.6051  | 3.7034 | 3.3851 | 3.5139 | 2.9382 | 3.0523 |
| TCGA-AZ-4682 | COAD |  |  |  |  |  |  |  |  |  | 0.6909  | 3.8120 | 3.4488 | 3.4448 | 3.6953 | 3.7116 |
| TCGA-AZ-4684 | COAD |  |  |  |  |  |  |  |  |  | 0.6798  | 3.6368 | 3.3388 | 3.3322 | 3.4182 | 3.4733 |
| TCGA-AZ-5403 | COAD |  |  |  |  |  |  |  |  |  | 0.8556  | 3.7228 | 3.3815 | 3.2672 | 3.5176 | 3.3306 |
| TCGA-AZ-5407 | COAD |  |  |  |  |  |  |  |  |  | 0.3350  | 3.8243 | 3.4472 | 3.3910 | 1.9737 | 2.8130 |
| TCGA-AZ-6598 | COAD |  |  |  |  |  |  |  |  |  | 0.4035  | 3.5815 | 3.3161 | 3.2861 | 1.4452 | 2.0259 |
| TCGA-AZ-6599 | COAD |  |  |  |  |  |  |  |  |  | -0.0148 | 3.5350 | 3.2973 | 3.3418 | 1.2931 | 2.0929 |
| TCGA-AZ-6600 | COAD |  |  |  |  |  |  |  |  |  | 0.4368  | 3.6139 | 3.2606 | 3.1830 | 2.0460 | 2.8786 |
| TCGA-AZ-6601 | COAD |  |  |  |  |  |  |  |  |  | 0.2951  | 3.6107 | 3.3389 | 3.2541 | 1.7806 | 2.1758 |
| TCGA-AZ-6603 | COAD |  |  |  |  |  |  |  |  |  | 0.4684  | 3.4775 | 3.2978 | 3.2523 | 3.0181 | 2.9914 |
| TCGA-AZ-6605 | COAD |  |  |  |  |  |  |  |  |  | 0.2754  | 3.4738 | 3.3612 | 3.1186 | 2.8979 | 2.6809 |
| TCGA-AZ-6606 | COAD |  |  |  |  |  |  |  |  |  | 0.5493  | 3.9481 | 3.5296 | 3.3946 | 2.8184 | 2.9112 |
| TCGA-AZ-6607 | COAD |  |  |  |  |  |  |  |  |  | 0.3645  | 3.6864 | 3.6578 | 3.3022 | 3.4216 | 3.2629 |
| TCGA-AZ-6608 | COAD |  |  |  |  |  |  |  |  |  | 0.8378  | 3.6779 | 3.4462 | 3.5490 | 3.1507 | 2.9412 |
| TCGA-BM-6198 | READ |  |  |  |  |  |  |  |  |  | 0.5358  | 3.6917 | 3.4250 | 3.3264 | 2.4271 | 2.7902 |
| TCGA-CA-5254 | COAD |  |  |  |  |  |  |  |  |  | 0.5369  | 3.7368 | 3.4820 | 3.3296 | 0.1805 | 1.6788 |
| TCGA-CA-5255 | COAD |  |  |  |  |  |  |  |  |  | 0.3608  | 4.0791 | 3.6034 | 3.3315 | 2.6386 | 3.0980 |
| TCGA-CA-5256 | COAD |  |  |  |  |  |  |  |  |  | 0.7540  | 3.7977 | 3.3907 | 3.4246 | 3.2013 | 3.3183 |
| TCGA-CA-5796 | COAD |  |  |  |  |  |  |  |  |  | 0.1538  | 3.7569 | 3.3218 | 3.1890 | 1.6250 | 2.7612 |
| TCGA-CA-5797 | COAD |  |  |  |  |  |  |  |  |  | 0.8244  | 3.4958 | 3.2964 | 3.4114 | 3.6164 | 3.4818 |
| TCGA-CA-6715 | COAD |  |  |  |  |  |  |  |  |  | 0.7789  | 3.4403 | 3.3591 | 3.5398 | 3.6273 | 3.7342 |

|              |      |  |  |  |  |  |  |  |  |  |  |         |        |        |        |        |        |
|--------------|------|--|--|--|--|--|--|--|--|--|--|---------|--------|--------|--------|--------|--------|
| TCGA-CA-6716 | COAD |  |  |  |  |  |  |  |  |  |  | 0.7312  | 3.5284 | 3.4742 | 3.6448 | 3.0476 | 3.0565 |
| TCGA-CA-6717 | COAD |  |  |  |  |  |  |  |  |  |  | 0.3573  | 3.5481 | 3.3743 | 3.3635 | 2.4973 | 2.5746 |
| TCGA-CA-6718 | COAD |  |  |  |  |  |  |  |  |  |  | 0.5006  | 3.5476 | 3.3680 | 3.2588 | 1.4060 | 2.5445 |
| TCGA-CA-6719 | COAD |  |  |  |  |  |  |  |  |  |  | 0.8250  | 3.4761 | 3.4891 | 3.6431 | 3.0982 | 3.0967 |
| TCGA-CI-6619 | READ |  |  |  |  |  |  |  |  |  |  | 0.3932  | 3.5155 | 3.3892 | 3.4196 | 3.0885 | 3.4903 |
| TCGA-CI-6620 | READ |  |  |  |  |  |  |  |  |  |  | 0.6952  | 3.4468 | 3.3396 | 3.3876 | 2.0554 | 2.5015 |
| TCGA-CI-6621 | READ |  |  |  |  |  |  |  |  |  |  | 0.5859  | 3.5140 | 3.3973 | 3.4188 | 3.6887 | 3.4448 |
| TCGA-CI-6622 | READ |  |  |  |  |  |  |  |  |  |  | 0.7266  | 3.7434 | 3.4139 | 3.4694 | 3.3519 | 3.2358 |
| TCGA-CI-6623 | READ |  |  |  |  |  |  |  |  |  |  | 0.8746  | 3.5182 | 3.3204 | 3.3293 | 3.3344 | 2.9812 |
| TCGA-CI-6624 | READ |  |  |  |  |  |  |  |  |  |  | 0.5859  | 3.6728 | 3.3681 | 3.2877 | 3.4923 | 3.3407 |
| TCGA-CK-4947 | COAD |  |  |  |  |  |  |  |  |  |  | 0.5667  | 3.5702 | 3.3916 | 3.4921 | 3.4099 | 3.3523 |
| TCGA-CK-4948 | COAD |  |  |  |  |  |  |  |  |  |  | 0.5856  | 3.5880 | 3.4333 | 3.4463 | 2.6938 | 3.1808 |
| TCGA-CK-4950 | COAD |  |  |  |  |  |  |  |  |  |  | 0.4582  | 3.7379 | 3.4105 | 3.4321 | 2.8033 | 3.0979 |
| TCGA-CK-4951 | COAD |  |  |  |  |  |  |  |  |  |  | 0.3384  | 3.6404 | 3.4197 | 3.3422 | 2.3198 | 2.5314 |
| TCGA-CK-4952 | COAD |  |  |  |  |  |  |  |  |  |  | 0.0900  | 3.5562 | 3.3261 | 3.3581 | 1.7392 | 2.6220 |
| TCGA-CK-5912 | COAD |  |  |  |  |  |  |  |  |  |  | 0.8312  | 3.2693 | 3.2867 | 3.4897 | 0.9534 | 1.4905 |
| TCGA-CK-5913 | COAD |  |  |  |  |  |  |  |  |  |  | 0.4998  | 3.6463 | 3.4317 | 3.3339 | 1.4813 | 2.4944 |
| TCGA-CK-5914 | COAD |  |  |  |  |  |  |  |  |  |  | 0.8172  | 3.5131 | 3.3993 | 3.5196 | 3.5285 | 3.4418 |
| TCGA-CK-5915 | COAD |  |  |  |  |  |  |  |  |  |  | 0.8043  | 3.4398 | 3.4518 | 3.6382 | 3.6404 | 2.8094 |
| TCGA-CK-5916 | COAD |  |  |  |  |  |  |  |  |  |  | 0.5369  | 3.5454 | 3.3866 | 3.3960 | 1.4722 | 2.4894 |
| TCGA-CK-6746 | COAD |  |  |  |  |  |  |  |  |  |  | 0.0842  | 3.5684 | 3.3084 | 3.0847 | 1.7199 | 2.4910 |
| TCGA-CK-6747 | COAD |  |  |  |  |  |  |  |  |  |  | 0.5573  | 3.7106 | 3.5222 | 3.6403 | 3.1329 | 3.1470 |
| TCGA-CK-6748 | COAD |  |  |  |  |  |  |  |  |  |  | 0.9233  | 3.6876 | 3.5020 | 3.5071 | 3.2190 | 3.1727 |
| TCGA-CK-6751 | COAD |  |  |  |  |  |  |  |  |  |  | 0.1975  | 3.7113 | 3.4889 | 3.5883 | 2.5550 | 3.0232 |
| TCGA-CL-4957 | READ |  |  |  |  |  |  |  |  |  |  | 0.6244  | 3.4424 | 3.3183 | 3.4288 | 3.2003 | 3.2628 |
| TCGA-CL-5917 | READ |  |  |  |  |  |  |  |  |  |  | 0.8138  | 3.4985 | 3.3693 | 3.4711 | 2.9860 | 2.9201 |
| TCGA-CL-5918 | READ |  |  |  |  |  |  |  |  |  |  | 0.9087  | 3.5671 | 3.3774 | 3.5000 | 3.4132 | 3.5156 |
| TCGA-CM-4743 | COAD |  |  |  |  |  |  |  |  |  |  | 0.3526  | 4.2513 | 3.7119 | 3.1514 | 3.4730 | 3.2707 |
| TCGA-CM-4744 | COAD |  |  |  |  |  |  |  |  |  |  | 0.4851  | 4.0857 | 3.6305 | 3.4259 | 2.1935 | 2.9327 |
| TCGA-CM-4746 | COAD |  |  |  |  |  |  |  |  |  |  | -0.2365 | 3.8919 | 3.5051 | 3.4376 | 1.6963 | 2.7080 |
| TCGA-CM-4747 | COAD |  |  |  |  |  |  |  |  |  |  | 0.8353  | 3.7033 | 3.4355 | 3.5395 | 2.8009 | 3.1211 |
| TCGA-CM-4748 | COAD |  |  |  |  |  |  |  |  |  |  | 0.5519  | 3.5918 | 3.3368 | 3.3917 | 2.9009 | 3.5403 |
| TCGA-CM-4750 | COAD |  |  |  |  |  |  |  |  |  |  | 0.9247  | 3.5648 | 3.3817 | 3.4362 | 3.1535 | 3.4680 |
| TCGA-CM-4751 | COAD |  |  |  |  |  |  |  |  |  |  | 0.3982  | 3.8250 | 3.4344 | 3.2772 | 3.0405 | 3.1104 |
| TCGA-CM-4752 | COAD |  |  |  |  |  |  |  |  |  |  | 0.8341  | 3.5309 | 3.2831 | 3.3340 | 2.6654 | 2.9727 |
| TCGA-CM-5341 | COAD |  |  |  |  |  |  |  |  |  |  | 0.8683  | 3.9073 | 3.4268 | 3.1974 | 3.3498 | 3.4026 |
| TCGA-CM-5344 | COAD |  |  |  |  |  |  |  |  |  |  | 0.8840  | 3.7408 | 3.4024 | 3.3984 | 3.3369 | 3.4259 |
| TCGA-CM-5348 | COAD |  |  |  |  |  |  |  |  |  |  | 0.6103  | 3.5881 | 3.3974 | 3.2823 | 2.6080 | 2.8123 |
| TCGA-CM-5349 | COAD |  |  |  |  |  |  |  |  |  |  | 0.6882  | 3.5955 | 3.3943 | 3.4515 | 2.6438 | 2.7964 |
| TCGA-CM-5860 | COAD |  |  |  |  |  |  |  |  |  |  | 0.6958  | 3.6260 | 3.4352 | 3.4090 | 3.3891 | 3.3360 |
| TCGA-CM-5861 | COAD |  |  |  |  |  |  |  |  |  |  | -0.1609 | 3.8735 | 3.5097 | 3.1877 | 1.7005 | 2.3908 |
| TCGA-CM-5862 | COAD |  |  |  |  |  |  |  |  |  |  | 0.5976  | 3.5102 | 3.2958 | 3.3826 | 2.5985 | 2.9129 |
| TCGA-CM-5863 | COAD |  |  |  |  |  |  |  |  |  |  | 0.2208  | 3.8199 | 3.4844 | 3.3835 | 1.6949 | 3.0579 |
| TCGA-CM-5864 | COAD |  |  |  |  |  |  |  |  |  |  | 0.6658  | 3.5828 | 3.3669 | 3.4816 | 2.6143 | 2.8992 |
| TCGA-CM-5868 | COAD |  |  |  |  |  |  |  |  |  |  | 0.7656  | 3.5430 | 3.3410 | 3.4024 | 2.9910 | 2.9638 |
| TCGA-CM-6161 | COAD |  |  |  |  |  |  |  |  |  |  | 0.5873  | 3.4464 | 3.3712 | 3.5128 | 2.9658 | 3.4444 |
| TCGA-CM-6162 | COAD |  |  |  |  |  |  |  |  |  |  | 0.1084  | 3.5668 | 3.4530 | 3.3158 | 2.9700 | 3.2737 |
| TCGA-CM-6163 | COAD |  |  |  |  |  |  |  |  |  |  | 0.6886  | 3.5938 | 3.2968 | 3.3015 | 3.0549 | 3.0528 |
| TCGA-CM-6164 | COAD |  |  |  |  |  |  |  |  |  |  | 0.9826  | 3.5261 | 3.4195 | 3.5599 | 3.4881 | 3.5801 |
| TCGA-CM-6165 | COAD |  |  |  |  |  |  |  |  |  |  | 0.5922  | 3.5413 | 3.2969 | 3.3179 | 3.2213 | 3.0641 |

|               |      |  |  |  |  |  |  |  |  |  |  |         |        |        |        |        |        |
|---------------|------|--|--|--|--|--|--|--|--|--|--|---------|--------|--------|--------|--------|--------|
| TCGA-CM-6166  | COAD |  |  |  |  |  |  |  |  |  |  | 0.7848  | 3.5014 | 3.4330 | 3.5844 | 3.5595 | 3.6199 |
| TCGA-CM-6167  | COAD |  |  |  |  |  |  |  |  |  |  | 0.4356  | 3.5067 | 3.3226 | 3.2038 | 1.9890 | 2.1955 |
| TCGA-CM-6168  | COAD |  |  |  |  |  |  |  |  |  |  | 0.5400  | 3.5385 | 3.4223 | 3.3745 | 3.5677 | 3.4851 |
| TCGA-CM-6169  | COAD |  |  |  |  |  |  |  |  |  |  | 0.7468  | 3.3795 | 3.3871 | 3.5021 | 2.7695 | 3.0915 |
| TCGA-CM-6170  | COAD |  |  |  |  |  |  |  |  |  |  | 0.9958  | 3.5085 | 3.3862 | 3.4779 | 3.0834 | 3.2134 |
| TCGA-CM-6171  | COAD |  |  |  |  |  |  |  |  |  |  | 0.1734  | 3.5062 | 3.3637 | 3.3795 | 1.3159 | 2.5971 |
| TCGA-CM-6172  | COAD |  |  |  |  |  |  |  |  |  |  | 0.5805  | 3.3911 | 3.2446 | 3.3289 | 1.4710 | 2.1135 |
| TCGA-CM-6674  | COAD |  |  |  |  |  |  |  |  |  |  | -0.0926 | 3.7261 | 3.3758 | 3.2906 | 2.1226 | 2.4319 |
| TCGA-CM-6675  | COAD |  |  |  |  |  |  |  |  |  |  | 0.5498  | 3.5532 | 3.3471 | 3.2714 | 2.4895 | 2.8844 |
| TCGA-CM-6676  | COAD |  |  |  |  |  |  |  |  |  |  | 0.8627  | 3.6043 | 3.4187 | 3.5682 | 3.7974 | 3.9823 |
| TCGA-CM-6677  | COAD |  |  |  |  |  |  |  |  |  |  | 0.8861  | 3.6046 | 3.3989 | 3.4672 | 3.0971 | 3.3253 |
| TCGA-CM-6678  | COAD |  |  |  |  |  |  |  |  |  |  | 0.6681  | 3.8543 | 3.4618 | 3.4408 | 2.3538 | 2.8000 |
| TCGA-CM-6679  | COAD |  |  |  |  |  |  |  |  |  |  | 1.0032  | 3.4336 | 3.3993 | 3.4576 | 2.9372 | 2.7546 |
| TCGA-CM-6680  | COAD |  |  |  |  |  |  |  |  |  |  | 0.2615  | 3.5356 | 3.5089 | 3.6753 | 2.3944 | 2.6716 |
| TCGA-D5-5537  | COAD |  |  |  |  |  |  |  |  |  |  | 0.7716  | 3.6565 | 3.4500 | 3.5650 | 2.3280 | 2.7351 |
| TCGA-D5-5538  | COAD |  |  |  |  |  |  |  |  |  |  | 0.7630  | 3.5182 | 3.3810 | 3.4467 | 3.1344 | 3.1446 |
| TCGA-D5-5539  | COAD |  |  |  |  |  |  |  |  |  |  | 0.1929  | 3.6900 | 3.4560 | 3.4308 | 2.3084 | 2.6927 |
| TCGA-D5-5540  | COAD |  |  |  |  |  |  |  |  |  |  | 0.6209  | 3.6122 | 3.3969 | 3.4500 | 3.8153 | 3.9584 |
| TCGA-D5-5541  | COAD |  |  |  |  |  |  |  |  |  |  | 0.7994  | 3.4702 | 3.3919 | 3.5573 | 3.4094 | 3.3953 |
| TCGA-D5-6529  | COAD |  |  |  |  |  |  |  |  |  |  | 0.7705  | 3.7205 | 3.5161 | 3.4610 | 1.4954 | 2.1529 |
| TCGA-D5-6530  | COAD |  |  |  |  |  |  |  |  |  |  | 0.1049  | 3.5330 | 3.3771 | 3.4108 | 2.2502 | 2.3799 |
| TCGA-D5-6531  | COAD |  |  |  |  |  |  |  |  |  |  | 0.6567  | 3.5139 | 3.4158 | 3.5503 | 3.0722 | 3.3281 |
| TCGA-D5-6532  | COAD |  |  |  |  |  |  |  |  |  |  | 0.8261  | 3.5316 | 3.3576 | 3.5461 | 3.4391 | 3.4778 |
| TCGA-D5-6533  | COAD |  |  |  |  |  |  |  |  |  |  | 0.9219  | 3.3486 | 3.2840 | 3.4290 | 3.4854 | 3.3416 |
| TCGA-D5-6534  | COAD |  |  |  |  |  |  |  |  |  |  | 0.3973  | 3.5662 | 3.4635 | 3.2320 | 1.5290 | 2.4696 |
| TCGA-D5-6535  | COAD |  |  |  |  |  |  |  |  |  |  | 0.7028  | 3.7228 | 3.4813 | 3.5406 | 2.8800 | 2.8508 |
| TCGA-D5-6536  | COAD |  |  |  |  |  |  |  |  |  |  | 0.4442  | 3.6201 | 3.4446 | 3.4505 | 1.9979 | 1.8206 |
| TCGA-D5-6537  | COAD |  |  |  |  |  |  |  |  |  |  | 0.8300  | 3.6365 | 3.4661 | 3.5465 | 3.1208 | 2.8450 |
| TCGA-D5-6538  | COAD |  |  |  |  |  |  |  |  |  |  | 0.5957  | 3.4859 | 3.3523 | 3.5281 | 2.1365 | 1.9966 |
| TCGA-D5-6539  | COAD |  |  |  |  |  |  |  |  |  |  | 0.4787  | 3.6361 | 3.2812 | 3.2389 | 2.3968 | 2.6580 |
| TCGA-D5-6540  | COAD |  |  |  |  |  |  |  |  |  |  | 0.1595  | 3.7894 | 3.5165 | 3.2170 | 1.8754 | 2.9725 |
| TCGA-D5-6541  | COAD |  |  |  |  |  |  |  |  |  |  | 0.6917  | 3.6123 | 3.4284 | 3.4321 | 2.6629 | 2.7082 |
| TCGA-D5-6898  | COAD |  |  |  |  |  |  |  |  |  |  | 0.7738  | 3.5975 | 3.4308 | 3.5125 | 3.8111 | 3.5053 |
| TCGA-D5-6920  | COAD |  |  |  |  |  |  |  |  |  |  | 0.5597  | 3.5756 | 3.4866 | 3.5638 | 3.2897 | 3.2674 |
| TCGA-D5-6922- | COAD |  |  |  |  |  |  |  |  |  |  | 0.7609  | 3.4824 | 3.3677 | 3.4166 | 3.1819 | 3.1264 |
| TCGA-D5-6923  | COAD |  |  |  |  |  |  |  |  |  |  | 0.7906  | 3.5369 | 3.4655 | 3.5042 | 3.5607 | 3.5609 |
| TCGA-D5-6924  | COAD |  |  |  |  |  |  |  |  |  |  | 0.7362  | 3.4016 | 3.3773 | 3.4728 | 3.3355 | 3.5849 |
| TCGA-D5-6926  | COAD |  |  |  |  |  |  |  |  |  |  | 0.8656  | 3.4611 | 3.4493 | 3.4784 | 2.7694 | 2.8955 |
| TCGA-D5-6927  | COAD |  |  |  |  |  |  |  |  |  |  | 0.4165  | 3.5038 | 3.3874 | 3.3629 | 3.6581 | 3.4168 |
| TCGA-D5-6928  | COAD |  |  |  |  |  |  |  |  |  |  | 0.1421  | 3.4160 | 3.3325 | 3.2695 | 0.5835 | 1.6336 |
| TCGA-D5-6929  | COAD |  |  |  |  |  |  |  |  |  |  | 0.9425  | 3.5142 | 3.3845 | 3.4869 | 3.2100 | 3.0808 |
| TCGA-D5-6930  | COAD |  |  |  |  |  |  |  |  |  |  | -0.1128 | 3.6960 | 3.4346 | 3.2455 | 1.1039 | 2.4525 |
| TCGA-D5-6931  | COAD |  |  |  |  |  |  |  |  |  |  | 0.5520  | 3.7187 | 3.4580 | 3.4690 | 1.7307 | 2.6969 |
| TCGA-D5-6932  | COAD |  |  |  |  |  |  |  |  |  |  | 0.8222  | 3.5777 | 3.4383 | 3.5334 | 3.2982 | 3.5129 |
| TCGA-D5-7000  | COAD |  |  |  |  |  |  |  |  |  |  | 0.3364  | 3.6988 | 3.4356 | 3.4020 | 1.8388 | 2.4893 |
| TCGA-DC-4745  | READ |  |  |  |  |  |  |  |  |  |  | 0.6845  | 3.6581 | 3.3516 | 3.4600 | 3.1754 | 3.4221 |
| TCGA-DC-4749  | READ |  |  |  |  |  |  |  |  |  |  | 0.8914  | 3.6808 | 3.3862 | 3.3614 | 3.4392 | 3.0345 |
| TCGA-DC-5337  | READ |  |  |  |  |  |  |  |  |  |  | 0.9290  | 3.7641 | 3.4374 | 3.4205 | 2.4256 | 2.8685 |
| TCGA-DC-5869  | READ |  |  |  |  |  |  |  |  |  |  | 0.8081  | 3.4959 | 3.3366 | 3.4146 | 3.7891 | 3.8595 |
| TCGA-DC-6154  | READ |  |  |  |  |  |  |  |  |  |  | 0.9834  | 3.6266 | 3.4392 | 3.5461 | 3.0965 | 3.0325 |
| TCGA-DC-6155  | READ |  |  |  |  |  |  |  |  |  |  | 0.6543  | 3.9453 | 3.5012 | 3.2080 | 3.3449 | 3.2654 |

|               |      |  |  |  |  |  |  |  |  |  |  |         |        |        |        |        |        |
|---------------|------|--|--|--|--|--|--|--|--|--|--|---------|--------|--------|--------|--------|--------|
| TCGA-DC-6156  | READ |  |  |  |  |  |  |  |  |  |  | 0.8009  | 3.4746 | 3.4145 | 3.4047 | 2.8339 | 2.9970 |
| TCGA-DC-6157  | READ |  |  |  |  |  |  |  |  |  |  | 0.8216  | 3.3234 | 3.3256 | 3.5300 | 3.6050 | 3.6368 |
| TCGA-DC-6158  | READ |  |  |  |  |  |  |  |  |  |  | 0.7366  | 3.3756 | 3.3921 | 3.4172 | 3.3273 | 3.1916 |
| TCGA-DC-6160  | READ |  |  |  |  |  |  |  |  |  |  | 0.7864  | 3.5803 | 3.3607 | 3.4364 | 2.5666 | 2.5153 |
| TCGA-DC-6681  | READ |  |  |  |  |  |  |  |  |  |  | 0.6286  | 3.7217 | 3.4560 | 3.5735 | 3.3447 | 3.5228 |
| TCGA-DC-6682  | READ |  |  |  |  |  |  |  |  |  |  | 0.7992  | 3.5262 | 3.3704 | 3.4653 | 3.7970 | 3.9742 |
| TCGA-DC-6683  | READ |  |  |  |  |  |  |  |  |  |  | 0.9628  | 3.7073 | 3.3799 | 3.4747 | 3.7084 | 3.5802 |
| TCGA-DM-A0X9  | COAD |  |  |  |  |  |  |  |  |  |  | 0.6597  | 3.6436 | 3.4070 | 3.4731 | 2.1012 | 2.9327 |
| TCGA-DM-A0XD- | COAD |  |  |  |  |  |  |  |  |  |  | 0.7480  | 3.7242 | 3.4835 | 3.3949 | 2.1798 | 2.5663 |
| TCGA-DM-A0XF  | COAD |  |  |  |  |  |  |  |  |  |  | 0.7368  | 3.6651 | 3.4154 | 3.4260 | 3.9644 | 3.8351 |
| TCGA-DM-A1D0  | COAD |  |  |  |  |  |  |  |  |  |  | 0.8659  | 3.8281 | 3.4150 | 3.4225 | 3.0910 | 2.5718 |
| TCGA-DM-A1D4  | COAD |  |  |  |  |  |  |  |  |  |  | 0.5084  | 3.8079 | 3.4214 | 3.4813 | 2.8791 | 2.9480 |
| TCGA-DM-A1D6  | COAD |  |  |  |  |  |  |  |  |  |  | 0.1167  | 3.8957 | 3.4433 | 3.3040 | 1.5407 | 2.5453 |
| TCGA-DM-A1D7  | COAD |  |  |  |  |  |  |  |  |  |  | 0.7971  | 3.7672 | 3.3987 | 3.4522 | 3.1247 | 2.8580 |
| TCGA-DM-A1D8  | COAD |  |  |  |  |  |  |  |  |  |  | 0.5651  | 3.5649 | 3.3544 | 3.4799 | 3.3438 | 3.6501 |
| TCGA-DM-A1D9  | COAD |  |  |  |  |  |  |  |  |  |  | 0.5870  | 3.6350 | 3.4186 | 3.5316 | 3.7762 | 3.8799 |
| TCGA-DM-A1DA  | COAD |  |  |  |  |  |  |  |  |  |  | 0.4232  | 3.6191 | 3.3080 | 3.4126 | 0.9651 | 2.8140 |
| TCGA-DM-A1DB  | COAD |  |  |  |  |  |  |  |  |  |  | 0.8158  | 3.3259 | 3.2526 | 3.4614 | 3.3031 | 3.6351 |
| TCGA-DM-A1HA  | COAD |  |  |  |  |  |  |  |  |  |  | 0.5759  | 3.7852 | 3.4970 | 3.5310 | 2.4580 | 2.9997 |
| TCGA-DM-A1HB- | COAD |  |  |  |  |  |  |  |  |  |  | 0.1306  | 3.6558 | 3.3702 | 3.3197 | 1.4918 | 2.9626 |
| TCGA-DM-A280  | COAD |  |  |  |  |  |  |  |  |  |  | 0.2748  | 3.9003 | 3.4788 | 3.3506 | 2.3278 | 2.8877 |
| TCGA-DM-A282  | COAD |  |  |  |  |  |  |  |  |  |  | 0.8012  | 3.6649 | 3.4037 | 3.4653 | 3.1122 | 3.5929 |
| TCGA-DM-A285  | COAD |  |  |  |  |  |  |  |  |  |  | 0.7256  | 3.3927 | 3.3487 | 3.4342 | 1.5305 | 3.2284 |
| TCGA-DM-A288  | COAD |  |  |  |  |  |  |  |  |  |  | 0.4018  | 3.6510 | 3.3261 | 3.4146 | 1.9065 | 2.8530 |
| TCGA-DM-A28A  | COAD |  |  |  |  |  |  |  |  |  |  | 0.8474  | 3.6400 | 3.4725 | 3.5875 | 2.6648 | 2.6429 |
| TCGA-DM-A28C  | COAD |  |  |  |  |  |  |  |  |  |  | 0.5816  | 3.5860 | 3.4702 | 3.6693 | 3.4199 | 3.6292 |
| TCGA-DM-A28E  | COAD |  |  |  |  |  |  |  |  |  |  | 0.9284  | 3.6038 | 3.3595 | 3.4933 | 2.8490 | 2.4369 |
| TCGA-DM-A28F  | COAD |  |  |  |  |  |  |  |  |  |  | 0.8683  | 3.7514 | 3.4043 | 3.3292 | 3.3519 | 3.6368 |
| TCGA-DM-A28G  | COAD |  |  |  |  |  |  |  |  |  |  | 0.5121  | 3.6784 | 3.4397 | 3.5063 | 2.6333 | 3.0710 |
| TCGA-DM-A28H  | COAD |  |  |  |  |  |  |  |  |  |  | 0.5672  | 3.4355 | 3.2544 | 3.4283 | 3.3112 | 3.2091 |
| TCGA-DM-A28K  | COAD |  |  |  |  |  |  |  |  |  |  | -0.2397 | 3.8666 | 3.4793 | 3.4149 | 0.7149 | 2.1891 |
| TCGA-DM-A28M  | COAD |  |  |  |  |  |  |  |  |  |  | 0.5411  | 3.7954 | 3.4610 | 3.5631 | 2.1703 | 2.8385 |
| TCGA-DT-5265  | READ |  |  |  |  |  |  |  |  |  |  | 0.4248  | 3.8429 | 3.5737 | 3.3590 | 1.4014 | 2.2130 |
| TCGA-DY-A0XA  | READ |  |  |  |  |  |  |  |  |  |  | 0.8085  | 3.4855 | 3.4158 | 3.6428 | 3.1244 | 2.9319 |
| TCGA-DY-A1DC  | READ |  |  |  |  |  |  |  |  |  |  | 0.8236  | 3.6704 | 3.4027 | 3.4618 | 3.7175 | 3.7555 |
| TCGA-DY-A1DD  | READ |  |  |  |  |  |  |  |  |  |  | 0.7117  | 3.4169 | 3.3233 | 3.4985 | 3.1145 | 3.2493 |
| TCGA-DY-A1DE  | READ |  |  |  |  |  |  |  |  |  |  | 0.7809  | 3.6413 | 3.3587 | 3.3978 | 2.5655 | 2.7541 |
| TCGA-DY-A1DF  | READ |  |  |  |  |  |  |  |  |  |  | 0.5324  | 3.7819 | 3.4613 | 3.5100 | 1.7137 | 2.6148 |
| TCGA-DY-A1DG  | READ |  |  |  |  |  |  |  |  |  |  | 0.8807  | 3.6762 | 3.3982 | 3.4840 | 3.4717 | 3.3888 |
| TCGA-DY-A1H8  | READ |  |  |  |  |  |  |  |  |  |  | 0.6892  | 3.8225 | 3.5318 | 3.6189 | 2.7617 | 3.2855 |
| TCGA-EF-5830  | READ |  |  |  |  |  |  |  |  |  |  | 0.7264  | 3.5795 | 3.3951 | 3.5479 | 3.1551 | 3.6324 |
| TCGA-EF-5831  | READ |  |  |  |  |  |  |  |  |  |  | 0.8540  | 3.6151 | 3.3973 | 3.4795 | 3.0122 | 2.7479 |
| TCGA-EI-6506  | READ |  |  |  |  |  |  |  |  |  |  | 0.4743  | 3.5814 | 3.3774 | 3.3604 | 3.3599 | 3.2535 |
| TCGA-EI-6507  | READ |  |  |  |  |  |  |  |  |  |  | 0.0763  | 3.8120 | 3.5254 | 3.3328 | 1.6262 | 2.7195 |
| TCGA-EI-6508  | READ |  |  |  |  |  |  |  |  |  |  | 0.6824  | 3.4839 | 3.4002 | 3.5763 | 3.2702 | 3.6467 |
| TCGA-EI-6509  | READ |  |  |  |  |  |  |  |  |  |  | 0.7702  | 3.5722 | 3.3807 | 3.5475 | 2.4292 | 2.2029 |
| TCGA-EI-6510  | READ |  |  |  |  |  |  |  |  |  |  | 0.3138  | 3.5111 | 3.3993 | 3.5844 | 1.4009 | 2.0483 |
| TCGA-EI-6511  | READ |  |  |  |  |  |  |  |  |  |  | 0.8072  | 3.5012 | 3.3294 | 3.3979 | 2.9367 | 3.2635 |
| TCGA-EI-6512  | READ |  |  |  |  |  |  |  |  |  |  | 0.6798  | 3.6207 | 3.3653 | 3.4101 | 2.5046 | 2.6988 |
| TCGA-EI-6513  | READ |  |  |  |  |  |  |  |  |  |  | 0.8066  | 3.3608 | 3.3376 | 3.4973 | 3.4368 | 3.3824 |
| TCGA-EI-6514  | READ |  |  |  |  |  |  |  |  |  |  | 0.9694  | 3.5729 | 3.3789 | 3.4700 | 3.3839 | 3.5824 |
| TCGA-EI-6881  | READ |  |  |  |  |  |  |  |  |  |  | 0.8413  | 3.6773 | 3.4220 | 3.4426 | 3.3872 | 3.1799 |
| TCGA-EI-6882  | READ |  |  |  |  |  |  |  |  |  |  | -0.0064 | 3.5331 | 3.4062 | 3.4463 | 2.3050 | 2.7090 |



|               |      |  |  |  |  |  |  |  |  |  |  |         |        |        |        |        |        |
|---------------|------|--|--|--|--|--|--|--|--|--|--|---------|--------|--------|--------|--------|--------|
| TCGA-EI-6883  | READ |  |  |  |  |  |  |  |  |  |  | 0.7093  | 3.4964 | 3.3523 | 3.5527 | 3.0618 | 3.4640 |
| TCGA-EI-6884  | READ |  |  |  |  |  |  |  |  |  |  | 0.6210  | 3.5652 | 3.3769 | 3.4287 | 2.8840 | 3.0077 |
| TCGA-EI-6885  | READ |  |  |  |  |  |  |  |  |  |  | 0.8029  | 3.4783 | 3.4783 | 3.6182 | 3.7889 | 3.6946 |
| TCGA-EI-6917  | READ |  |  |  |  |  |  |  |  |  |  | 0.3485  | 3.5355 | 3.4246 | 3.4913 | 1.6876 | 2.8471 |
| TCGA-EI-7002  | READ |  |  |  |  |  |  |  |  |  |  | 0.9135  | 3.6229 | 3.4203 | 3.5100 | 2.6320 | 3.1279 |
| TCGA-EI-7004  | READ |  |  |  |  |  |  |  |  |  |  | 0.0132  | 3.5304 | 3.4237 | 3.2011 | 1.8769 | 2.0789 |
| TCGA-F4-6459  | COAD |  |  |  |  |  |  |  |  |  |  | 0.8531  | 3.5204 | 3.3539 | 3.3449 | 3.0205 | 3.0409 |
| TCGA-F4-6460  | COAD |  |  |  |  |  |  |  |  |  |  | 0.3257  | 3.4877 | 3.3341 | 3.4241 | 2.4414 | 2.8374 |
| TCGA-F4-6461  | COAD |  |  |  |  |  |  |  |  |  |  | 0.4416  | 3.8347 | 3.5742 | 3.5070 | 1.1439 | 3.1720 |
| TCGA-F4-6463  | COAD |  |  |  |  |  |  |  |  |  |  | 0.4894  | 3.4990 | 3.4287 | 3.5426 | 2.4322 | 2.9919 |
| TCGA-F4-6569  | COAD |  |  |  |  |  |  |  |  |  |  | 0.5649  | 3.5050 | 3.4642 | 3.4902 | 3.0567 | 2.7355 |
| TCGA-F4-6570  | COAD |  |  |  |  |  |  |  |  |  |  | 0.2570  | 3.6737 | 3.4384 | 3.3406 | 0.1198 | 2.2597 |
| TCGA-F4-6703  | COAD |  |  |  |  |  |  |  |  |  |  | 0.4613  | 3.5936 | 3.4838 | 3.2296 | 2.0012 | 2.2776 |
| TCGA-F4-6704  | COAD |  |  |  |  |  |  |  |  |  |  | 0.1143  | 3.4684 | 3.2403 | 3.0567 | 1.9809 | 2.7360 |
| TCGA-F4-6805  | COAD |  |  |  |  |  |  |  |  |  |  | 0.5054  | 3.6266 | 3.5099 | 3.4618 | 3.3141 | 3.0177 |
| TCGA-F4-6806  | COAD |  |  |  |  |  |  |  |  |  |  | 0.5943  | 3.6725 | 3.4613 | 3.5344 | 1.7554 | 2.6692 |
| TCGA-F4-6807  | COAD |  |  |  |  |  |  |  |  |  |  | 0.6992  | 3.5691 | 3.4776 | 3.5372 | 2.9593 | 3.2382 |
| TCGA-F4-6808  | COAD |  |  |  |  |  |  |  |  |  |  | 0.8267  | 3.6168 | 3.3073 | 3.3534 | 3.5080 | 3.6571 |
| TCGA-F4-6809  | COAD |  |  |  |  |  |  |  |  |  |  | 0.6724  | 3.6267 | 3.3988 | 3.4641 | 3.1038 | 3.1281 |
| TCGA-F4-6854  | COAD |  |  |  |  |  |  |  |  |  |  | 0.7127  | 3.4986 | 3.3319 | 3.4369 | 3.1481 | 3.2410 |
| TCGA-F4-6855  | COAD |  |  |  |  |  |  |  |  |  |  | 0.4674  | 3.6607 | 3.4910 | 3.5149 | 2.4277 | 2.6617 |
| TCGA-F4-6856  | COAD |  |  |  |  |  |  |  |  |  |  | -0.1416 | 3.6928 | 3.3668 | 3.2227 | 1.1868 | 2.0697 |
| TCGA-F5-6464  | READ |  |  |  |  |  |  |  |  |  |  | 0.5250  | 3.7846 | 3.5745 | 3.2919 | 2.2267 | 2.9485 |
| TCGA-F5-6465  | READ |  |  |  |  |  |  |  |  |  |  | 0.8923  | 3.4117 | 3.4411 | 3.6081 | 3.2122 | 2.8204 |
| TCGA-F5-6571  | READ |  |  |  |  |  |  |  |  |  |  | 0.8934  | 3.4840 | 3.3391 | 3.4126 | 2.5809 | 2.5222 |
| TCGA-F5-6702  | READ |  |  |  |  |  |  |  |  |  |  | 0.5980  | 3.5091 | 3.5045 | 3.3669 | 2.7460 | 2.6566 |
| TCGA-F5-6810  | READ |  |  |  |  |  |  |  |  |  |  | 0.7197  | 3.5029 | 3.3820 | 3.4495 | 3.3601 | 3.5450 |
| TCGA-F5-6811  | READ |  |  |  |  |  |  |  |  |  |  | 0.7962  | 3.6757 | 3.4680 | 3.3871 | 2.7779 | 2.6160 |
| TCGA-F5-6812  | READ |  |  |  |  |  |  |  |  |  |  | 0.7761  | 3.5922 | 3.3648 | 3.3322 | 2.2643 | 2.2904 |
| TCGA-F5-6813  | READ |  |  |  |  |  |  |  |  |  |  | 0.8371  | 3.6925 | 3.3859 | 3.4033 | 1.2086 | 2.0749 |
| TCGA-F5-6814  | READ |  |  |  |  |  |  |  |  |  |  | 0.4598  | 3.4362 | 3.3192 | 3.4007 | 3.0779 | 3.1105 |
| TCGA-F5-6861  | READ |  |  |  |  |  |  |  |  |  |  | 0.5776  | 3.6810 | 3.4401 | 3.4837 | 2.8357 | 2.8980 |
| TCGA-F5-6863  | READ |  |  |  |  |  |  |  |  |  |  | 0.7329  | 3.5727 | 3.4355 | 3.5375 | 2.8609 | 3.0350 |
| TCGA-F5-6864  | READ |  |  |  |  |  |  |  |  |  |  | 0.7723  | 3.4781 | 3.3414 | 3.4061 | 1.5648 | 1.9812 |
| TCGA-G4-6293  | COAD |  |  |  |  |  |  |  |  |  |  | 0.7917  | 3.6829 | 3.5099 | 3.5462 | 2.8634 | 2.8567 |
| TCGA-G4-6294  | COAD |  |  |  |  |  |  |  |  |  |  | 0.9797  | 3.5245 | 3.3033 | 3.4104 | 2.4016 | 2.5227 |
| TCGA-G4-6295  | COAD |  |  |  |  |  |  |  |  |  |  | 0.7179  | 3.2819 | 3.3512 | 3.5599 | 3.2995 | 3.4524 |
| TCGA-G4-6297  | COAD |  |  |  |  |  |  |  |  |  |  | 0.7842  | 3.6854 | 3.4917 | 3.3564 | 3.3083 | 2.8807 |
| TCGA-G4-6298  | COAD |  |  |  |  |  |  |  |  |  |  | 0.7735  | 3.5509 | 3.4181 | 3.5048 | 3.2585 | 3.3564 |
| TCGA-G4-6299  | COAD |  |  |  |  |  |  |  |  |  |  | 0.3843  | 3.5833 | 3.3849 | 3.2875 | 2.0763 | 2.5207 |
| TCGA-G4-6302  | COAD |  |  |  |  |  |  |  |  |  |  | 0.0929  | 3.6138 | 3.4843 | 3.3187 | 2.1551 | 2.4817 |
| TCGA-G4-6303  | COAD |  |  |  |  |  |  |  |  |  |  | 0.9061  | 3.5521 | 3.3918 | 3.5301 | 3.3324 | 2.9060 |
| TCGA-G4-6304  | COAD |  |  |  |  |  |  |  |  |  |  | 0.5106  | 3.5674 | 3.3340 | 3.4695 | 1.8220 | 2.4436 |
| TCGA-G4-6306  | COAD |  |  |  |  |  |  |  |  |  |  | 0.7426  | 3.7474 | 3.4079 | 3.4349 | 3.0927 | 2.8623 |
| TCGA-G4-6307  | COAD |  |  |  |  |  |  |  |  |  |  | 0.9181  | 3.7236 | 3.4256 | 3.5304 | 3.3746 | 3.0855 |
| TCGA-G4-6309  | COAD |  |  |  |  |  |  |  |  |  |  | 0.1592  | 3.7408 | 3.3388 | 3.2574 | 2.4657 | 3.0415 |
| TCGA-G4-6310  | COAD |  |  |  |  |  |  |  |  |  |  | 0.6960  | 3.4508 | 3.2965 | 3.3905 | 2.8087 | 2.6494 |
| TCGA-G4-6311  | COAD |  |  |  |  |  |  |  |  |  |  | 0.7398  | 3.6151 | 3.5002 | 3.4781 | 3.5585 | 3.2617 |
| TCGA-G4-6314  | COAD |  |  |  |  |  |  |  |  |  |  | 0.6827  | 3.5154 | 3.4569 | 3.5076 | 3.1341 | 2.9898 |
| TCGA-G4-6315  | COAD |  |  |  |  |  |  |  |  |  |  | 0.6524  | 3.5461 | 3.3246 | 3.4401 | 3.4014 | 3.5065 |
| TCGA-G4-6317- | COAD |  |  |  |  |  |  |  |  |  |  | 0.9783  | 3.6015 | 3.3249 | 3.4190 | 3.5842 | 3.5202 |
| TCGA-G4-6320  | COAD |  |  |  |  |  |  |  |  |  |  | 0.1063  | 3.9466 | 3.5165 | 3.3520 | 1.2868 | 2.2744 |
| TCGA-G4-6321  | COAD |  |  |  |  |  |  |  |  |  |  | -0.0064 | 4.0763 | 3.5204 | 3.1644 | 2.4240 | 3.4071 |

|              |      |  |  |  |  |  |  |  |  |  |         |        |        |        |        |        |
|--------------|------|--|--|--|--|--|--|--|--|--|---------|--------|--------|--------|--------|--------|
| TCGA-G4-6322 | COAD |  |  |  |  |  |  |  |  |  | 0.1747  | 3.5214 | 3.3930 | 3.5294 | 1.1112 | 2.6082 |
| TCGA-G4-6323 | COAD |  |  |  |  |  |  |  |  |  | 0.4423  | 3.6980 | 3.4474 | 3.4612 | 2.0522 | 2.7433 |
| TCGA-G4-6586 | COAD |  |  |  |  |  |  |  |  |  | 0.4000  | 3.7714 | 3.2917 | 3.2379 | 1.3769 | 2.3793 |
| TCGA-G4-6588 | COAD |  |  |  |  |  |  |  |  |  | 0.1655  | 3.4692 | 3.2997 | 3.2294 | 1.3229 | 2.1027 |
| TCGA-G4-6625 | COAD |  |  |  |  |  |  |  |  |  | 0.6452  | 3.4810 | 3.3262 | 3.4217 | 3.3903 | 3.2934 |
| TCGA-G4-6626 | COAD |  |  |  |  |  |  |  |  |  | 0.8045  | 3.5517 | 3.4423 | 3.6381 | 3.4622 | 3.6713 |
| TCGA-G4-6627 | COAD |  |  |  |  |  |  |  |  |  | 0.4671  | 3.7935 | 3.5005 | 3.4314 | 3.1539 | 3.2807 |
| TCGA-G4-6628 | COAD |  |  |  |  |  |  |  |  |  | 0.2424  | 3.4473 | 3.3196 | 3.3058 | 1.7638 | 2.1787 |
| TCGA-G5-6233 | READ |  |  |  |  |  |  |  |  |  | 0.5262  | 3.7030 | 3.3520 | 3.2888 | 1.5468 | 2.5924 |
| TCGA-G5-6235 | READ |  |  |  |  |  |  |  |  |  | 0.6527  | 3.6137 | 3.3225 | 3.3752 | 3.1818 | 3.1957 |
| TCGA-G5-6572 | READ |  |  |  |  |  |  |  |  |  | 0.6044  | 3.5710 | 3.3901 | 3.4778 | 2.9846 | 2.7932 |
| TCGA-G5-6641 | READ |  |  |  |  |  |  |  |  |  | 0.4379  | 3.6490 | 3.3934 | 3.4518 | 1.8437 | 2.6611 |
| TCGA-NH-A50T | COAD |  |  |  |  |  |  |  |  |  | 0.7343  | 3.5939 | 3.3797 | 3.5056 | 2.9135 | 3.0067 |
| TCGA-NH-A50U | COAD |  |  |  |  |  |  |  |  |  | 0.5045  | 3.6076 | 3.3835 | 3.4746 | 1.3399 | 2.1859 |
| TCGA-NH-A50V | COAD |  |  |  |  |  |  |  |  |  | 0.6687  | 3.4956 | 3.3581 | 3.4148 | 1.9194 | 2.8231 |
| TCGA-NH-A51V | COAD |  |  |  |  |  |  |  |  |  | 0.0886  | 3.5655 | 3.3634 | 3.3877 | 1.1260 | 2.0859 |
| TCGA-NH-A6GA | COAD |  |  |  |  |  |  |  |  |  | 0.5706  | 3.6170 | 3.4328 | 3.4766 | 2.5312 | 2.6143 |
| TCGA-NH-A6GB | COAD |  |  |  |  |  |  |  |  |  | 0.7815  | 3.4793 | 3.3741 | 3.4720 | 2.9458 | 3.0709 |
| TCGA-NH-A6GC | COAD |  |  |  |  |  |  |  |  |  | 0.1970  | 3.6563 | 3.3640 | 3.3789 | 1.3572 | 1.8861 |
| TCGA-NH-A8F7 | COAD |  |  |  |  |  |  |  |  |  | 0.8034  | 3.3949 | 3.3164 | 3.4941 | 2.9908 | 3.1429 |
| TCGA-NH-A8F8 | COAD |  |  |  |  |  |  |  |  |  | 0.8715  | 3.6496 | 3.4380 | 3.4787 | 2.7986 | 2.9086 |
| TCGA-QG-A5YV | COAD |  |  |  |  |  |  |  |  |  | 0.7004  | 3.6514 | 3.4387 | 3.5361 | 3.0392 | 2.9036 |
| TCGA-QG-A5YW | COAD |  |  |  |  |  |  |  |  |  | 0.6142  | 3.6593 | 3.4555 | 3.4776 | 2.5699 | 2.8454 |
| TCGA-QG-A5YX | COAD |  |  |  |  |  |  |  |  |  | 0.6620  | 3.6137 | 3.2997 | 3.3563 | 2.0652 | 2.5632 |
| TCGA-QG-A5Z1 | COAD |  |  |  |  |  |  |  |  |  | 0.8110  | 3.5339 | 3.4604 | 3.6187 | 1.9803 | 2.5827 |
| TCGA-QG-A5Z2 | COAD |  |  |  |  |  |  |  |  |  | 0.0912  | 3.5955 | 3.3365 | 3.3730 | 1.5995 | 2.4691 |
| TCGA-QL-A97D | COAD |  |  |  |  |  |  |  |  |  | 0.7216  | 3.6360 | 3.3549 | 3.3781 | 3.0992 | 3.2589 |
| TCGA-RU-A8FL | COAD |  |  |  |  |  |  |  |  |  | 0.7987  | 3.6070 | 3.3692 | 3.4954 | 3.5177 | 3.3476 |
| TCGA-SS-A7HO | COAD |  |  |  |  |  |  |  |  |  | 0.6541  | 3.3313 | 3.3065 | 3.5217 | 2.4394 | 2.7289 |
| TCGA-T9-A92H | COAD |  |  |  |  |  |  |  |  |  | 0.8956  | 3.6355 | 3.4128 | 3.5090 | 3.6903 | 3.6006 |
| TCGA-WS-AB45 | COAD |  |  |  |  |  |  |  |  |  | -0.4388 | 3.4152 | 3.5856 | 2.9955 | 2.3000 | 2.5740 |

**Supplementary Table S6. Marisa et al (n=566) (8)---Stages, driver mutations and signature scores**

**Note:** The signature scores were calculated as described in Methods and merged with other molecular parameters as described previously(8).

| id     | TNM Stage | Tumor Location | TP53 Mutation | KRAS Mutation | BRAF Mutation | 203-gene CTX-S scores | 64-gene Wnt scores | 24-gene Wnt scores | 18-gene RAS scores | EREG (log2) | AREG (log2) |
|--------|-----------|----------------|---------------|---------------|---------------|-----------------------|--------------------|--------------------|--------------------|-------------|-------------|
| CIT035 | 2         | distal         | M             | WT            | WT            | 0.5560                | 2.7203             | 2.9038             | 2.8114             | 2.9027      | 2.5673      |
| CIT044 | 3         | distal         | WT            | WT            | WT            | 0.5518                | 2.6860             | 2.8801             | 2.7575             | 2.3285      | 2.1944      |
| CIT234 | 2         | distal         | M             | WT            | WT            | 0.5412                | 2.7165             | 2.8813             | 2.7808             | 2.8751      | 2.4841      |
| CIT068 | 3         | distal         | NA            | WT            | WT            | 0.5405                | 2.7168             | 2.8713             | 2.7960             | 2.9948      | 2.6113      |
| CIT332 | 4         | distal         | NA            | WT            | WT            | 0.5366                | 2.6721             | 2.8721             | 2.7976             | 3.2248      | 2.5609      |
| CIT082 | 2         | distal         | NA            | WT            | WT            | 0.5276                | 2.7861             | 2.9887             | 2.7715             | 3.1132      | 2.7269      |
| CIT019 | 2         | distal         | WT            | WT            | WT            | 0.5270                | 2.7772             | 2.8984             | 2.8534             | 3.0082      | 2.6705      |
| CIT020 | 2         | distal         | M             | WT            | WT            | 0.5256                | 2.7202             | 2.8937             | 2.7647             | 2.9800      | 2.6544      |
| CIT079 | 2         | proximal       | NA            | WT            | WT            | 0.5249                | 2.7352             | 2.9190             | 2.7450             | 3.0060      | 2.7292      |
| CIT417 | 3         | proximal       | M             | WT            | WT            | 0.5245                | 2.6925             | 2.8684             | 2.7827             | 2.9021      | 2.6009      |
| CIT058 | 4         | distal         | M             | WT            | WT            | 0.5211                | 2.7746             | 2.9146             | 2.7938             | 3.2529      | 2.8322      |
| CIT174 | 2         | distal         | NA            | WT            | WT            | 0.5197                | 2.7311             | 2.9192             | 2.7536             | 3.0034      | 2.6757      |
| CIT143 | 3         | distal         | NA            | WT            | WT            | 0.5074                | 2.6785             | 2.9003             | 2.7571             | 2.6420      | 2.3436      |
| CIT183 | 3         | distal         | M             | WT            | NA            | 0.5071                | 2.6878             | 2.8632             | 2.7718             | 2.7475      | 2.3817      |
| CIT347 | 1         | distal         | M             | WT            | WT            | 0.5036                | 2.7219             | 2.8712             | 2.7850             | 3.1202      | 2.6857      |
| CIT412 | 3         | distal         | M             | WT            | WT            | 0.5019                | 2.7627             | 2.9324             | 2.7914             | 2.5985      | 2.5046      |
| CIT391 | 2         | distal         | M             | WT            | WT            | 0.5019                | 2.7323             | 2.8672             | 2.8095             | 3.0054      | 2.6613      |
| CIT280 | 4         | distal         | NA            | WT            | WT            | 0.5011                | 2.7199             | 2.8370             | 2.7983             | 2.9239      | 2.4981      |
| CIT356 | 2         | distal         | M             | WT            | WT            | 0.4995                | 2.6851             | 2.8765             | 2.7747             | 3.0864      | 2.7153      |
| CIT036 | 2         | distal         | WT            | WT            | WT            | 0.4941                | 2.7505             | 2.8770             | 2.8136             | 2.4545      | 2.3395      |
| CIT208 | 3         | distal         | WT            | WT            | NA            | 0.4937                | 2.8018             | 2.9108             | 2.8036             | 2.9919      | 2.5934      |
| CIT223 | 2         | distal         | M             | WT            | WT            | 0.4920                | 2.7372             | 2.8100             | 2.8223             | 2.3842      | 2.1651      |
| CIT097 | 2         | proximal       | NA            | WT            | WT            | 0.4890                | 2.7726             | 2.9174             | 2.8228             | 3.1398      | 2.7530      |
| CIT291 | 2         | distal         | NA            | WT            | WT            | 0.4865                | 2.7090             | 2.8058             | 2.8054             | 2.5899      | 2.4549      |
| CIT104 | 2         | distal         | NA            | WT            | WT            | 0.4844                | 2.7162             | 2.8540             | 2.8242             | 2.2321      | 1.9398      |
| CIT443 | 3         | distal         | M             | WT            | WT            | 0.4828                | 2.7769             | 2.8635             | 2.8358             | 2.1934      | 2.1255      |
| CIT005 | 4         | distal         | M             | WT            | WT            | 0.4828                | 2.7514             | 2.8009             | 2.8408             | 2.8790      | 2.3972      |
| CIT187 | 2         | distal         | WT            | WT            | WT            | 0.4820                | 2.7599             | 2.9125             | 2.7767             | 2.9115      | 2.5970      |
| CIT204 | 2         | distal         | M             | WT            | NA            | 0.4815                | 2.7066             | 2.8452             | 2.7986             | 2.7723      | 2.5145      |
| CIT343 | 4         | distal         | NA            | WT            | WT            | 0.4807                | 2.7115             | 2.8170             | 2.7767             | 2.9926      | 2.6507      |
| CIT213 | 2         | distal         | WT            | WT            | NA            | 0.4779                | 2.7668             | 2.8627             | 2.8358             | 3.1319      | 2.8183      |
| CIT105 | 2         | distal         | NA            | WT            | WT            | 0.4776                | 2.7183             | 2.9022             | 2.7616             | 2.1716      | 2.2320      |
| CIT076 | 2         | proximal       | NA            | WT            | WT            | 0.4769                | 2.7769             | 2.9206             | 2.8368             | 3.0945      | 2.6457      |
| CIT238 | 3         | distal         | M             | WT            | WT            | 0.4754                | 2.7745             | 2.8997             | 2.7837             | 2.7677      | 2.4622      |
| CIT382 | 2         | distal         | M             | WT            | WT            | 0.4745                | 2.7045             | 2.8300             | 2.8039             | 2.6206      | 2.2449      |
| CIT062 | 3         | distal         | NA            | WT            | WT            | 0.4740                | 2.7609             | 2.8906             | 2.8179             | 3.1078      | 2.5135      |
| CIT115 | 2         | distal         | NA            | WT            | WT            | 0.4721                | 2.8055             | 2.9395             | 2.8333             | 3.0779      | 2.7380      |
| CIT422 | 3         | proximal       | WT            | WT            | WT            | 0.4693                | 2.7468             | 2.8410             | 2.8738             | 2.7387      | 2.3263      |
| CIT188 | 2         | distal         | M             | WT            | WT            | 0.4683                | 2.7441             | 2.9456             | 2.7861             | 2.9795      | 2.7513      |
| CIT101 | 2         | distal         | NA            | WT            | WT            | 0.4682                | 2.7206             | 2.9050             | 2.8026             | 2.5290      | 2.2308      |
| CIT281 | 1         | distal         | NA            | WT            | WT            | 0.4672                | 2.7417             | 2.8554             | 2.8003             | 2.9010      | 2.3840      |
| CIT149 | 3         | distal         | NA            | WT            | WT            | 0.4648                | 2.7244             | 2.8250             | 2.7531             | 2.8421      | 2.4002      |
| CIT282 | 3         | distal         | NA            | WT            | WT            | 0.4646                | 2.7740             | 2.8298             | 2.8163             | 2.9469      | 2.4968      |
| CIT251 | 3         | distal         | M             | WT            | WT            | 0.4610                | 2.7979             | 2.8817             | 2.8230             | 3.1516      | 2.7381      |
| CIT137 | 2         | distal         | NA            | WT            | WT            | 0.4596                | 2.7627             | 2.8934             | 2.8399             | 3.1777      | 2.8267      |
| CIT134 | 2         | distal         | NA            | WT            | WT            | 0.4574                | 2.7071             | 2.8651             | 2.8286             | 2.8409      | 2.5120      |
| CIT420 | 3         | distal         | M             | WT            | WT            | 0.4562                | 2.8209             | 2.8889             | 2.8761             | 2.9638      | 2.3465      |

|        |   |          |    |    |    |        |        |        |        |        |        |
|--------|---|----------|----|----|----|--------|--------|--------|--------|--------|--------|
| CIT211 | 2 | distal   | WT | WT | WT | 0.4552 | 2.7314 | 2.8675 | 2.7786 | 2.8553 | 2.4822 |
| CIT243 | 3 | distal   | M  | WT | WT | 0.4533 | 2.7404 | 2.9050 | 2.8231 | 2.6828 | 2.4923 |
| CIT131 | 2 | proximal | NA | WT | WT | 0.4533 | 2.7482 | 2.8703 | 2.8445 | 2.9030 | 2.4283 |
| CIT388 | 2 | distal   | M  | WT | WT | 0.4512 | 2.8293 | 2.9149 | 2.7925 | 2.4137 | 2.1864 |
| CIT030 | 2 | proximal | M  | WT | WT | 0.4496 | 2.7838 | 2.9001 | 2.8394 | 2.6969 | 2.4804 |
| CIT191 | 2 | distal   | M  | WT | WT | 0.4487 | 2.7884 | 2.8588 | 2.8235 | 3.2157 | 2.7433 |
| CIT400 | 2 | distal   | M  | WT | WT | 0.4485 | 2.7455 | 2.9192 | 2.7586 | 3.1583 | 2.8454 |
| CIT129 | 2 | proximal | NA | WT | WT | 0.4461 | 2.7238 | 2.7846 | 2.8359 | 2.6373 | 2.2128 |
| CIT071 | 3 | proximal | NA | WT | WT | 0.4455 | 2.7661 | 2.9501 | 2.8042 | 2.2828 | 2.3585 |
| CIT357 | 1 | distal   | M  | WT | WT | 0.4427 | 2.7093 | 2.8737 | 2.8225 | 2.9527 | 2.7699 |
| CIT057 | 4 | distal   | WT | WT | WT | 0.4423 | 2.7649 | 2.9206 | 2.8162 | 2.8868 | 2.5609 |
| CIT375 | 2 | distal   | WT | WT | WT | 0.4409 | 2.7592 | 2.8318 | 2.8091 | 3.1121 | 2.7469 |
| CIT274 | 3 | distal   | NA | WT | WT | 0.4408 | 2.7568 | 2.8693 | 2.8744 | 2.9940 | 2.6889 |
| CIT432 | 2 | distal   | M  | WT | WT | 0.4400 | 2.7758 | 2.9352 | 2.8033 | 3.0114 | 2.7324 |
| CIT118 | 2 | distal   | NA | WT | WT | 0.4386 | 2.7331 | 2.8915 | 2.7909 | 2.8150 | 2.2629 |
| CIT249 | 2 | distal   | WT | WT | WT | 0.4357 | 2.7439 | 2.8776 | 2.8101 | 2.6724 | 2.3767 |
| CIT372 | 3 | distal   | WT | WT | WT | 0.4353 | 2.7985 | 2.9047 | 2.7995 | 2.8519 | 2.4573 |
| CIT350 | 2 | distal   | M  | WT | WT | 0.4352 | 2.7239 | 2.8767 | 2.8082 | 2.8034 | 2.1822 |
| CIT254 | 4 | distal   | M  | WT | WT | 0.4344 | 2.7645 | 2.9084 | 2.7983 | 3.1168 | 2.5701 |
| CIT127 | 2 | distal   | NA | WT | WT | 0.4342 | 2.7606 | 2.8381 | 2.7924 | 2.8469 | 2.4049 |
| CIT351 | 2 | proximal | WT | WT | WT | 0.4339 | 2.6975 | 2.8323 | 2.7560 | 2.6916 | 2.3991 |
| CIT302 | 2 | distal   | NA | WT | WT | 0.4332 | 2.6933 | 2.7955 | 2.7635 | 2.9460 | 2.6443 |
| CIT260 | 4 | distal   | M  | WT | WT | 0.4324 | 2.7537 | 2.8976 | 2.7858 | 2.8038 | 2.5212 |
| CIT185 | 3 | distal   | M  | WT | NA | 0.4308 | 2.7766 | 2.8409 | 2.8052 | 3.0115 | 2.5799 |
| CIT255 | 3 | distal   | M  | WT | WT | 0.4293 | 2.7203 | 2.8575 | 2.8067 | 2.5629 | 2.1840 |
| CIT181 | 2 | distal   | M  | WT | NA | 0.4288 | 2.7201 | 2.9172 | 2.7398 | 2.9783 | 2.7586 |
| CIT380 | 3 | distal   | M  | WT | WT | 0.4285 | 2.7045 | 2.8341 | 2.7691 | 2.7213 | 2.1265 |
| CIT248 | 2 | distal   | M  | WT | WT | 0.4281 | 2.7356 | 2.8279 | 2.8342 | 2.7943 | 2.3725 |
| CIT084 | 2 | distal   | NA | WT | WT | 0.4259 | 2.7701 | 2.9354 | 2.8535 | 3.0270 | 2.7730 |
| CIT367 | 3 | distal   | M  | WT | WT | 0.4255 | 2.7070 | 2.8945 | 2.7735 | 3.0354 | 2.7623 |
| CIT247 | 3 | distal   | M  | WT | WT | 0.4233 | 2.7686 | 2.8957 | 2.8454 | 2.7937 | 2.4744 |
| CIT414 | 3 | distal   | M  | WT | WT | 0.4217 | 2.6998 | 2.8443 | 2.8080 | 2.7581 | 2.4254 |
| CIT386 | 1 | distal   | WT | WT | WT | 0.4212 | 2.7401 | 2.8789 | 2.8702 | 2.4797 | 2.1913 |
| CIT229 | 3 | distal   | M  | WT | WT | 0.4210 | 2.7362 | 2.9016 | 2.7609 | 2.2865 | 2.0857 |
| CIT297 | 4 | proximal | NA | WT | WT | 0.4191 | 2.7475 | 2.8880 | 2.8137 | 2.7423 | 2.1735 |
| CIT425 | 2 | distal   | M  | WT | WT | 0.4190 | 2.6702 | 2.8123 | 2.8469 | 2.1260 | 2.0176 |
| CIT130 | 2 | distal   | NA | WT | WT | 0.4180 | 2.7454 | 2.8793 | 2.7595 | 2.7300 | 2.4173 |
| CIT252 | 4 | distal   | M  | WT | WT | 0.4165 | 2.7753 | 2.8625 | 2.8601 | 3.0889 | 2.5498 |
| CIT429 | 2 | distal   | M  | WT | WT | 0.4153 | 2.7414 | 2.8046 | 2.8736 | 2.6780 | 2.4198 |
| CIT311 | 2 | distal   | NA | WT | WT | 0.4145 | 2.6773 | 2.8226 | 2.7959 | 3.0767 | 2.6071 |
| CIT245 | 3 | proximal | WT | WT | WT | 0.4141 | 2.7443 | 2.8177 | 2.8865 | 2.6606 | 2.3908 |
| CIT353 | 2 | proximal | WT | WT | WT | 0.4138 | 2.7217 | 2.9093 | 2.8694 | 2.6813 | 2.2593 |
| CIT277 | 2 | distal   | NA | WT | WT | 0.4123 | 2.7223 | 2.8075 | 2.7932 | 2.8622 | 2.4205 |
| CIT385 | 3 | distal   | M  | WT | WT | 0.4111 | 2.7653 | 2.9008 | 2.8712 | 2.9241 | 2.4861 |
| CIT300 | 4 | distal   | NA | WT | WT | 0.4102 | 2.7542 | 2.9107 | 2.9043 | 2.8773 | 2.5032 |
| CIT290 | 3 | distal   | NA | WT | WT | 0.4094 | 2.7938 | 2.9255 | 2.8796 | 2.3068 | 1.7492 |
| CIT110 | 4 | distal   | NA | WT | WT | 0.4084 | 2.7482 | 2.8953 | 2.7947 | 2.8324 | 2.4451 |
| CIT087 | 4 | distal   | NA | WT | WT | 0.4082 | 2.7962 | 2.9523 | 2.8512 | 3.0726 | 2.7506 |
| CIT197 | 2 | distal   | M  | WT | WT | 0.4073 | 2.7656 | 2.8572 | 2.8041 | 3.0836 | 2.7422 |
| CIT384 | 2 | distal   | WT | WT | WT | 0.4052 | 2.7733 | 2.8747 | 2.8122 | 2.8678 | 2.4027 |
| CIT421 | 3 | distal   | WT | WT | WT | 0.4041 | 2.7630 | 2.8393 | 2.8647 | 2.0422 | 1.9868 |
| CIT431 | 2 | distal   | M  | WT | WT | 0.4016 | 2.7744 | 2.9104 | 2.8203 | 2.9634 | 2.5958 |
| CIT427 | 2 | distal   | M  | WT | WT | 0.4016 | 2.6836 | 2.8245 | 2.8026 | 2.8043 | 2.5363 |
| CIT200 | 3 | distal   | WT | WT | NA | 0.4014 | 2.7059 | 2.7888 | 2.8153 | 2.9805 | 2.4971 |
| CIT140 | 3 | distal   | NA | WT | WT | 0.4009 | 2.7366 | 2.8958 | 2.8804 | 2.6778 | 2.3581 |
| CIT246 | 3 | distal   | M  | WT | WT | 0.4006 | 2.7988 | 2.9296 | 2.8375 | 3.1720 | 2.5257 |
| CIT172 | 2 | distal   | NA | WT | WT | 0.4002 | 2.7827 | 2.8720 | 2.8447 | 2.7907 | 2.4521 |
| CIT298 | 4 | distal   | NA | WT | WT | 0.4002 | 2.7856 | 2.8876 | 2.8341 | 2.6223 | 2.4109 |
| CIT415 | 3 | proximal | M  | WT | WT | 0.4000 | 2.7702 | 2.8966 | 2.8535 | 2.0820 | 2.2215 |

|        |   |          |    |    |    |        |        |        |        |        |        |
|--------|---|----------|----|----|----|--------|--------|--------|--------|--------|--------|
| CIT299 | 2 | proximal | NA | WT | WT | 0.3996 | 2.7765 | 2.8170 | 2.8026 | 3.1160 | 2.8029 |
| CIT233 | 3 | proximal | M  | WT | WT | 0.3974 | 2.7364 | 2.8791 | 2.7838 | 2.6292 | 2.4533 |
| CIT379 | 1 | distal   | M  | WT | WT | 0.3954 | 2.7209 | 2.8169 | 2.7725 | 3.0575 | 2.7476 |
| CIT398 | 3 | proximal | M  | WT | WT | 0.3926 | 2.7701 | 2.8646 | 2.8423 | 3.0306 | 2.6647 |
| CIT413 | 3 | distal   | M  | WT | WT | 0.3915 | 2.7727 | 2.7659 | 2.8441 | 2.8280 | 2.3163 |
| CIT439 | 3 | distal   | M  | WT | WT | 0.3910 | 2.7422 | 2.8304 | 2.8239 | 2.8965 | 2.4531 |
| CIT218 | 3 | distal   | M  | WT | WT | 0.3892 | 2.7446 | 2.8949 | 2.8112 | 2.9282 | 2.5160 |
| CIT402 | 2 | distal   | M  | WT | WT | 0.3884 | 2.7550 | 2.8707 | 2.8024 | 2.9995 | 2.6889 |
| CIT111 | 2 | distal   | NA | WT | WT | 0.3882 | 2.8355 | 2.9076 | 2.8786 | 2.5842 | 2.3931 |
| CIT004 | 1 | distal   | M  | WT | WT | 0.3873 | 2.7480 | 2.9286 | 2.7635 | 2.5317 | 2.3215 |
| CIT122 | 2 | distal   | NA | WT | WT | 0.3869 | 2.8277 | 2.9510 | 2.8364 | 2.9086 | 2.5926 |
| CIT193 | 2 | distal   | WT | WT | NA | 0.3864 | 2.7120 | 2.8397 | 2.7904 | 2.7024 | 2.4734 |
| CIT201 | 3 | distal   | WT | WT | NA | 0.3840 | 2.7561 | 2.8587 | 2.8000 | 3.1200 | 2.6424 |
| CIT220 | 3 | proximal | M  | WT | WT | 0.3817 | 2.7802 | 2.8903 | 2.8609 | 2.1266 | 2.2162 |
| CIT442 | 2 | distal   | M  | WT | WT | 0.3817 | 2.7175 | 2.8309 | 2.7667 | 2.7178 | 2.4715 |
| CIT109 | 2 | distal   | NA | WT | WT | 0.3810 | 2.7863 | 2.9129 | 2.8376 | 3.0871 | 2.7049 |
| CIT045 | 3 | distal   | M  | WT | WT | 0.3755 | 2.7305 | 2.8824 | 2.7568 | 2.8199 | 2.4613 |
| CIT214 | 3 | distal   | WT | WT | NA | 0.3703 | 2.7753 | 2.8535 | 2.7364 | 2.6072 | 2.3428 |
| CIT180 | 3 | distal   | WT | WT | WT | 0.3689 | 2.7453 | 2.8586 | 2.8080 | 2.9826 | 2.8580 |
| CIT334 | 1 | distal   | NA | WT | WT | 0.3666 | 2.7922 | 2.8720 | 2.8617 | 3.0744 | 2.7390 |
| CIT151 | 3 | distal   | NA | WT | WT | 0.3630 | 2.7736 | 2.8373 | 2.8252 | 2.7406 | 2.3866 |
| CIT016 | 1 | distal   | WT | WT | WT | 0.3629 | 2.7816 | 2.9149 | 2.8628 | 2.8339 | 2.5859 |
| CIT244 | 2 | distal   | WT | WT | WT | 0.3610 | 2.7754 | 2.9372 | 2.8377 | 2.2684 | 2.5331 |
| CIT008 | 3 | distal   | M  | WT | WT | 0.3609 | 2.7455 | 2.8252 | 2.8715 | 3.0879 | 2.7263 |
| CIT377 | 2 | distal   | M  | WT | WT | 0.3594 | 2.7752 | 2.9331 | 2.8129 | 2.8527 | 2.5533 |
| CIT194 | 3 | distal   | M  | WT | NA | 0.3588 | 2.6944 | 2.7908 | 2.7782 | 2.7860 | 2.6649 |
| CIT275 | 4 | distal   | NA | WT | WT | 0.3552 | 2.7588 | 2.8162 | 2.8249 | 3.1048 | 2.5099 |
| CIT159 | 3 | distal   | NA | WT | WT | 0.3549 | 2.7237 | 2.8260 | 2.7983 | 2.4865 | 2.3050 |
| CIT288 | 1 | distal   | NA | WT | WT | 0.3510 | 2.6853 | 2.7730 | 2.7526 | 2.6543 | 2.2634 |
| CIT069 | 3 | distal   | NA | WT | WT | 0.3489 | 2.7290 | 2.8553 | 2.8176 | 2.6161 | 2.4151 |
| CIT182 | 2 | distal   | WT | WT | NA | 0.3479 | 2.6571 | 2.8163 | 2.7649 | 2.1384 | 1.9622 |
| CIT153 | 3 | proximal | NA | WT | WT | 0.3454 | 2.8037 | 2.9010 | 2.9365 | 2.2028 | 2.2137 |
| CIT395 | 2 | distal   | NA | WT | WT | 0.3449 | 2.7408 | 2.8461 | 2.8419 | 3.1851 | 2.7667 |
| CIT396 | 3 | distal   | M  | WT | WT | 0.3393 | 2.7938 | 2.8531 | 2.9150 | 2.5827 | 2.5644 |
| CIT206 | 3 | distal   | M  | WT | NA | 0.3386 | 2.7883 | 2.8396 | 2.8369 | 2.8535 | 2.4712 |
| CIT189 | 3 | distal   | M  | WT | NA | 0.3372 | 2.7035 | 2.7966 | 2.7638 | 2.2410 | 2.1947 |
| CIT050 | 4 | distal   | WT | WT | WT | 0.3333 | 2.7817 | 2.8890 | 2.8744 | 3.1026 | 2.8020 |
| CIT226 | 2 | distal   | WT | WT | WT | 0.3330 | 2.7790 | 2.8958 | 2.8245 | 2.6627 | 2.3404 |
| CIT428 | 2 | distal   | M  | WT | WT | 0.3310 | 2.7856 | 2.8560 | 2.7923 | 2.1991 | 2.0567 |
| CIT038 | 2 | proximal | M  | WT | WT | 0.3301 | 2.8141 | 2.9741 | 2.8660 | 2.2632 | 2.4920 |
| CIT073 | 3 | distal   | NA | WT | WT | 0.3300 | 2.7492 | 2.8163 | 2.8531 | 2.9887 | 2.6478 |
| CIT168 | 2 | distal   | NA | WT | WT | 0.3289 | 2.7217 | 2.8472 | 2.8178 | 3.0044 | 2.5118 |
| CIT365 | 3 | distal   | M  | WT | WT | 0.3279 | 2.7490 | 2.8399 | 2.8014 | 2.4080 | 2.2293 |
| CIT269 | 2 | distal   | NA | WT | WT | 0.3261 | 2.8003 | 2.8553 | 2.8869 | 2.7437 | 2.6464 |
| CIT231 | 2 | proximal | M  | WT | WT | 0.3233 | 2.7666 | 2.8482 | 2.8521 | 2.7284 | 2.6010 |
| CIT003 | 2 | proximal | M  | WT | WT | 0.3200 | 2.7804 | 2.8919 | 2.9153 | 2.3201 | 2.4781 |
| CIT418 | 3 | distal   | WT | WT | WT | 0.3182 | 2.7664 | 2.9003 | 2.8410 | 2.8967 | 2.5646 |
| CIT404 | 3 | distal   | M  | WT | WT | 0.3182 | 2.7712 | 2.8661 | 2.8152 | 2.6954 | 2.4259 |
| CIT002 | 4 | distal   | WT | WT | WT | 0.3173 | 2.8149 | 2.8893 | 2.8327 | 2.8688 | 2.6250 |
| CIT028 | 2 | proximal | WT | WT | M  | 0.3141 | 2.7381 | 2.8191 | 2.8732 | 2.1012 | 2.1448 |
| CIT043 | 3 | distal   | M  | WT | WT | 0.3139 | 2.7824 | 2.8471 | 2.8515 | 3.0229 | 2.6168 |
| CIT090 | 2 | distal   | NA | WT | WT | 0.3135 | 2.7406 | 2.8418 | 2.8212 | 2.8166 | 2.4363 |
| CIT065 | 3 | distal   | NA | WT | WT | 0.3130 | 2.7162 | 2.7726 | 2.6915 | 1.9867 | 1.8239 |
| CIT310 | 4 | distal   | NA | WT | WT | 0.3123 | 2.7450 | 2.9397 | 2.8825 | 2.9014 | 2.4829 |
| CIT224 | 2 | distal   | M  | WT | WT | 0.3122 | 2.6891 | 2.7368 | 2.8846 | 2.4803 | 2.1222 |
| CIT064 | 3 | distal   | NA | WT | WT | 0.3107 | 2.8136 | 2.8735 | 2.8621 | 2.8689 | 2.5120 |
| CIT325 | 1 | distal   | NA | WT | WT | 0.3105 | 2.8247 | 2.8809 | 2.8219 | 2.8133 | 2.3654 |
| CIT285 | 2 | distal   | NA | WT | WT | 0.3086 | 2.7165 | 2.7771 | 2.8647 | 2.9477 | 2.5286 |
| CIT207 | 2 | distal   | M  | WT | NA | 0.3083 | 2.7091 | 2.7915 | 2.7941 | 2.6025 | 2.3973 |
| CIT308 | 2 | proximal | NA | WT | WT | 0.3044 | 2.7679 | 2.8294 | 2.9394 | 2.6545 | 2.2982 |
| CIT352 | 3 | proximal | WT | WT | WT | 0.3006 | 2.6675 | 2.6940 | 2.9167 | 1.9249 | 1.8778 |

|        |   |          |    |    |    |        |        |        |        |        |        |
|--------|---|----------|----|----|----|--------|--------|--------|--------|--------|--------|
| CIT283 | 2 | distal   | NA | WT | WT | 0.3002 | 2.6893 | 2.7894 | 2.7414 | 2.5073 | 2.4503 |
| CIT278 | 4 | proximal | NA | WT | WT | 0.2952 | 2.7813 | 2.8126 | 2.7915 | 2.5037 | 2.0219 |
| CIT039 | 2 | distal   | WT | WT | WT | 0.2945 | 2.6707 | 2.7525 | 2.7591 | 2.6469 | 2.3084 |
| CIT099 | 2 | distal   | NA | WT | WT | 0.2943 | 2.7873 | 2.9415 | 2.8725 | 1.8345 | 2.0962 |
| CIT373 | 2 | distal   | WT | WT | WT | 0.2920 | 2.7237 | 2.8158 | 2.8040 | 2.3768 | 2.5187 |
| CIT013 | 1 | distal   | WT | WT | WT | 0.2918 | 2.6654 | 2.7348 | 2.7621 | 1.9607 | 1.8991 |
| CIT209 | 2 | proximal | M  | WT | NA | 0.2906 | 2.7758 | 2.8618 | 2.8500 | 2.2190 | 2.2312 |
| CIT253 | 4 | proximal | M  | WT | M  | 0.2863 | 2.7487 | 2.7627 | 2.8897 | 2.0676 | 2.0051 |
| CIT266 | 2 | proximal | NA | WT | WT | 0.2820 | 2.7041 | 2.7148 | 2.7682 | 2.5702 | 2.1958 |
| CIT358 | 3 | proximal | WT | WT | M  | 0.2811 | 2.6791 | 2.7020 | 2.7845 | 2.0676 | 1.8122 |
| CIT052 | 4 | distal   | M  | WT | M  | 0.2776 | 2.7758 | 2.6602 | 2.8933 | 2.5450 | 2.3154 |
| CIT055 | 4 | distal   | WT | WT | M  | 0.2739 | 2.7805 | 2.7896 | 2.9237 | 2.1495 | 1.9172 |
| CIT017 | 2 | distal   | WT | WT | WT | 0.2731 | 2.7639 | 2.8675 | 2.8378 | 2.0070 | 1.6039 |
| CIT394 | 3 | distal   | WT | WT | WT | 0.2730 | 2.7480 | 2.8840 | 2.8463 | 2.6623 | 2.4614 |
| CIT103 | 2 | distal   | NA | WT | M  | 0.2726 | 2.7439 | 2.7466 | 2.8938 | 2.3452 | 2.1102 |
| CIT307 | 3 | distal   | NA | WT | WT | 0.2667 | 2.6893 | 2.6870 | 2.7847 | 2.4371 | 2.1868 |
| CIT100 | 2 | proximal | NA | WT | M  | 0.2652 | 2.7492 | 2.8174 | 2.9184 | 2.4928 | 2.2931 |
| CIT063 | 3 | proximal | NA | WT | M  | 0.2640 | 2.7894 | 2.7776 | 2.8669 | 2.3729 | 2.2052 |
| CIT169 | 2 | distal   | NA | WT | WT | 0.2627 | 2.7375 | 2.7630 | 2.7981 | 2.7088 | 2.4020 |
| CIT070 | 3 | distal   | NA | WT | NA | 0.2605 | 2.7677 | 2.6908 | 2.8911 | 2.4444 | 2.1017 |
| CIT177 | 3 | distal   | M  | WT | NA | 0.2592 | 2.7240 | 2.7354 | 2.8278 | 2.8807 | 2.5130 |
| CIT060 | 2 | proximal | M  | WT | WT | 0.2546 | 2.7025 | 2.6995 | 2.8022 | 2.5264 | 2.0076 |
| CIT032 | 4 | proximal | M  | WT | M  | 0.2542 | 2.7381 | 2.7978 | 2.8422 | 2.3086 | 2.1619 |
| CIT319 | 2 | proximal | NA | WT | M  | 0.2509 | 2.7460 | 2.5960 | 2.9380 | 2.7978 | 2.1986 |
| CIT178 | 3 | distal   | M  | WT | NA | 0.2488 | 2.7716 | 2.8675 | 2.8933 | 2.2158 | 2.1604 |
| CIT123 | 2 | distal   | NA | WT | WT | 0.2466 | 2.7849 | 2.8345 | 2.8584 | 2.3090 | 2.2546 |
| CIT327 | 2 | proximal | NA | WT | WT | 0.2464 | 2.7573 | 2.7203 | 2.9357 | 2.3154 | 2.2200 |
| CIT435 | 2 | proximal | WT | WT | M  | 0.2406 | 2.7392 | 2.7947 | 2.8475 | 2.2049 | 2.0831 |
| CIT040 | 3 | proximal | WT | WT | WT | 0.2403 | 2.7835 | 2.7528 | 2.8672 | 2.2682 | 2.3698 |
| CIT401 | 2 | distal   | WT | WT | WT | 0.2386 | 2.5758 | 2.5673 | 2.6898 | 2.0924 | 2.1560 |
| CIT338 | 2 | distal   | NA | WT | M  | 0.2361 | 2.7060 | 2.6882 | 2.8549 | 2.3772 | 2.1169 |
| CIT119 | 2 | distal   | NA | WT | WT | 0.2324 | 2.7263 | 2.8483 | 2.8277 | 2.1943 | 2.3786 |
| CIT024 | 3 | proximal | WT | WT | M  | 0.2308 | 2.7350 | 2.6854 | 2.8525 | 2.8557 | 2.5585 |
| CIT041 | 3 | proximal | M  | WT | M  | 0.2284 | 2.6789 | 2.6892 | 2.8672 | 2.0318 | 1.9617 |
| CIT083 | 4 | distal   | NA | WT | WT | 0.2273 | 2.7056 | 2.6436 | 2.8033 | 2.8300 | 2.4684 |
| CIT088 | 2 | proximal | NA | WT | WT | 0.2267 | 2.7226 | 2.8247 | 2.8841 | 2.1643 | 2.0499 |
| CIT161 | 3 | proximal | NA | WT | M  | 0.2251 | 2.6973 | 2.7300 | 2.8292 | 2.1920 | 2.2019 |
| CIT349 | 3 | proximal | WT | WT | M  | 0.2186 | 2.7178 | 2.6841 | 2.8799 | 2.4264 | 2.3573 |
| CIT345 | 3 | distal   | M  | WT | WT | 0.2172 | 2.6996 | 2.6799 | 2.7813 | 2.3836 | 2.4154 |
| CIT158 | 3 | proximal | NA | WT | M  | 0.2162 | 2.7913 | 2.9131 | 2.8934 | 2.3797 | 2.4607 |
| CIT007 | 2 | proximal | WT | WT | WT | 0.2159 | 2.7330 | 2.7411 | 2.8503 | 2.5063 | 1.8936 |
| CIT284 | 4 | distal   | NA | WT | WT | 0.2152 | 2.7777 | 2.7166 | 2.8537 | 2.0796 | 1.8839 |
| CIT241 | 2 | proximal | WT | WT | M  | 0.2115 | 2.7336 | 2.7869 | 2.8398 | 1.9846 | 2.1260 |
| CIT329 | 2 | distal   | NA | WT | WT | 0.2102 | 2.7702 | 2.7615 | 2.9600 | 2.6645 | 2.1800 |
| CIT160 | 3 | distal   | NA | WT | WT | 0.2100 | 2.6429 | 2.6693 | 2.7027 | 2.1495 | 2.1322 |
| CIT027 | 3 | proximal | M  | WT | M  | 0.2075 | 2.7299 | 2.7520 | 2.8996 | 2.2253 | 1.9743 |
| CIT381 | 3 | proximal | WT | WT | M  | 0.2071 | 2.7130 | 2.7323 | 2.8588 | 2.1610 | 2.1316 |
| CIT051 | 4 | proximal | WT | WT | M  | 0.2039 | 2.7443 | 2.7475 | 2.8662 | 1.9457 | 1.9691 |
| CIT215 | 3 | proximal | WT | WT | NA | 0.2026 | 2.7533 | 2.7444 | 2.8426 | 2.9947 | 2.3262 |
| CIT314 | 2 | proximal | NA | WT | M  | 0.2009 | 2.7012 | 2.7322 | 2.8430 | 1.9258 | 1.8446 |
| CIT336 | 2 | proximal | NA | WT | M  | 0.1986 | 2.7471 | 2.7965 | 2.9334 | 1.9929 | 2.2422 |
| CIT318 | 3 | proximal | NA | WT | M  | 0.1973 | 2.7669 | 2.7695 | 2.9218 | 2.0059 | 2.0818 |
| CIT355 | 2 | distal   | WT | WT | WT | 0.1972 | 2.5460 | 2.6181 | 2.6157 | 1.9270 | 1.5317 |
| CIT361 | 2 | proximal | WT | WT | M  | 0.1971 | 2.7395 | 2.7721 | 2.8939 | 2.3634 | 2.2389 |
| CIT390 | 3 | distal   | M  | WT | M  | 0.1963 | 2.6714 | 2.7052 | 2.9204 | 2.1761 | 2.1597 |
| CIT272 | 2 | proximal | NA | WT | M  | 0.1953 | 2.7440 | 2.8684 | 2.8627 | 1.9064 | 2.1652 |
| CIT403 | 2 | proximal | WT | WT | WT | 0.1950 | 2.6965 | 2.7345 | 2.7641 | 2.3600 | 2.1811 |
| CIT378 | 3 | proximal | WT | WT | M  | 0.1944 | 2.7964 | 2.8242 | 2.8738 | 2.2925 | 2.2083 |
| CIT305 | 3 | proximal | NA | WT | M  | 0.1922 | 2.7512 | 2.7632 | 2.9259 | 1.9215 | 2.4014 |
| CIT102 | 2 | proximal | NA | WT | M  | 0.1914 | 2.7640 | 2.7815 | 2.9057 | 2.3239 | 2.0681 |
| CIT006 | 3 | proximal | WT | WT | WT | 0.1912 | 2.7473 | 2.7432 | 2.8342 | 2.3437 | 1.9909 |

|        |   |          |    |    |    |        |        |        |        |        |        |
|--------|---|----------|----|----|----|--------|--------|--------|--------|--------|--------|
| CIT128 | 2 | distal   | NA | WT | WT | 0.1911 | 2.6875 | 2.7273 | 2.7707 | 2.1569 | 1.9808 |
| CIT440 | 2 | proximal | WT | WT | WT | 0.1881 | 2.6922 | 2.8610 | 2.8476 | 2.0757 | 1.7813 |
| CIT371 | 2 | proximal | WT | WT | WT | 0.1866 | 2.7218 | 2.6471 | 2.8640 | 2.6070 | 2.3902 |
| CIT116 | 2 | proximal | NA | WT | M  | 0.1855 | 2.7656 | 2.8036 | 2.8825 | 1.7789 | 2.1564 |
| CIT074 | 3 | proximal | NA | WT | M  | 0.1850 | 2.7330 | 2.7818 | 2.8890 | 2.2097 | 2.1456 |
| CIT031 | 2 | proximal | WT | WT | WT | 0.1848 | 2.7033 | 2.8495 | 2.8011 | 1.9860 | 2.1698 |
| CIT376 | 2 | distal   | M  | WT | M  | 0.1791 | 2.7708 | 2.7436 | 2.9161 | 2.2517 | 2.1668 |
| CIT132 | 2 | distal   | NA | WT | WT | 0.1788 | 2.6906 | 2.7089 | 2.7769 | 2.3424 | 2.0795 |
| CIT265 | 2 | proximal | NA | WT | M  | 0.1786 | 2.7280 | 2.7674 | 2.8963 | 1.6883 | 1.9058 |
| CIT323 | 3 | proximal | NA | WT | M  | 0.1738 | 2.7211 | 2.7241 | 2.8540 | 2.3786 | 2.0742 |
| CIT309 | 3 | proximal | NA | WT | M  | 0.1620 | 2.7093 | 2.7761 | 2.9037 | 1.8030 | 1.9196 |
| CIT023 | 2 | proximal | WT | WT | WT | 0.1609 | 2.7459 | 2.7085 | 2.9275 | 2.4875 | 2.3022 |
| CIT264 | 3 | proximal | NA | WT | M  | 0.1597 | 2.7042 | 2.7028 | 2.8943 | 1.7908 | 1.7425 |
| CIT360 | 2 | proximal | WT | WT | M  | 0.1554 | 2.7453 | 2.7827 | 2.9322 | 2.0208 | 2.1192 |
| CIT258 | 4 | proximal | M  | WT | M  | 0.1506 | 2.7217 | 2.7418 | 2.8734 | 1.9456 | 2.1814 |
| CIT212 | 3 | proximal | WT | WT | NA | 0.1437 | 2.7362 | 2.7414 | 2.8844 | 2.0775 | 2.2220 |
| CIT331 | 2 | proximal | NA | WT | WT | 0.1408 | 2.7994 | 2.7480 | 2.9559 | 2.7764 | 2.4353 |
| CIT133 | 2 | proximal | NA | WT | WT | 0.1394 | 2.7184 | 2.6729 | 2.7881 | 2.3909 | 2.2147 |
| CIT228 | 2 | proximal | WT | WT | M  | 0.1369 | 2.7352 | 2.6648 | 2.8935 | 2.5986 | 2.2363 |
| CIT120 | 2 | proximal | NA | WT | WT | 0.1305 | 2.7418 | 2.7351 | 2.8497 | 2.0075 | 1.8835 |
| CIT306 | 2 | distal   | NA | WT | M  | 0.1280 | 2.7278 | 2.7115 | 2.8729 | 1.9330 | 2.1189 |
| CIT321 | 2 | proximal | NA | WT | M  | 0.1237 | 2.6917 | 2.7107 | 2.9155 | 1.7627 | 1.9542 |
| CIT322 | 1 | proximal | NA | WT | M  | 0.1134 | 2.7413 | 2.7900 | 2.8822 | 1.8792 | 1.9326 |
| CIT267 | 2 | proximal | NA | WT | M  | 0.1096 | 2.7230 | 2.6869 | 2.8916 | 2.2135 | 2.0684 |
| CIT512 | 2 | distal   | M  | WT | WT | 0.5577 | 2.7601 | 2.8584 | 2.8197 | 3.0696 | 2.6214 |
| CIT535 | 2 | distal   | M  | WT | WT | 0.5347 | 2.7374 | 2.8435 | 2.8231 | 3.0419 | 2.5628 |
| CIT539 | 3 | proximal | WT | WT | WT | 0.5119 | 2.7595 | 2.9540 | 2.8431 | 2.0780 | 2.3515 |
| CIT527 | 2 | distal   | M  | WT | WT | 0.5047 | 2.7395 | 2.8813 | 2.7973 | 2.6647 | 2.4270 |
| CIT451 | 2 | distal   | NA | WT | WT | 0.5025 | 2.7791 | 2.9138 | 2.8260 | 2.7775 | 2.3723 |
| CIT458 | 2 | distal   | WT | WT | WT | 0.4975 | 2.7707 | 2.9008 | 2.7900 | 3.2343 | 2.8225 |
| CIT508 | 1 | distal   | M  | WT | WT | 0.4962 | 2.7777 | 2.8822 | 2.8451 | 3.0095 | 2.7749 |
| CIT558 | 3 | distal   | M  | WT | WT | 0.4795 | 2.7229 | 2.8466 | 2.7896 | 3.0554 | 2.7217 |
| CIT534 | 2 | distal   | M  | WT | WT | 0.4787 | 2.7791 | 2.9243 | 2.8134 | 2.9228 | 2.5413 |
| CIT494 | 2 | distal   | M  | WT | WT | 0.4717 | 2.7220 | 2.8189 | 2.8157 | 3.0032 | 2.4901 |
| CIT528 | 2 | distal   | WT | WT | WT | 0.4658 | 2.7929 | 2.8742 | 2.8237 | 2.8889 | 2.5278 |
| CIT449 | 2 | distal   | NA | WT | WT | 0.4596 | 2.7549 | 2.8942 | 2.8261 | 2.7731 | 2.5743 |
| CIT545 | 3 | distal   | M  | WT | WT | 0.4591 | 2.7748 | 2.8716 | 2.8334 | 2.6632 | 2.3484 |
| CIT471 | 2 | distal   | M  | WT | WT | 0.4578 | 2.7395 | 2.8771 | 2.7869 | 2.4958 | 2.2656 |
| CIT559 | 2 | distal   | M  | WT | WT | 0.4577 | 2.7240 | 2.8139 | 2.8225 | 2.8758 | 2.6088 |
| CIT525 | 3 | distal   | M  | WT | WT | 0.4538 | 2.7920 | 2.8516 | 2.8342 | 2.8124 | 2.3924 |
| CIT536 | 1 | proximal | M  | WT | WT | 0.4504 | 2.7491 | 2.8931 | 2.7697 | 2.9523 | 2.7750 |
| CIT500 | 2 | distal   | M  | WT | WT | 0.4439 | 2.6778 | 2.8070 | 2.7367 | 2.7876 | 2.4448 |
| CIT461 | 2 | distal   | WT | WT | WT | 0.4423 | 2.7415 | 2.8844 | 2.7892 | 2.9170 | 2.4592 |
| CIT462 | 2 | distal   | M  | WT | WT | 0.4418 | 2.7232 | 2.8431 | 2.8183 | 2.8495 | 2.4823 |
| CIT555 | 3 | proximal | M  | WT | WT | 0.4371 | 2.7507 | 2.8462 | 2.8334 | 3.0131 | 2.6642 |
| CIT481 | 4 | distal   | WT | WT | WT | 0.4362 | 2.7687 | 2.8689 | 2.8344 | 2.6067 | 2.3065 |
| CIT465 | 3 | distal   | M  | WT | WT | 0.4301 | 2.7679 | 2.8320 | 2.8637 | 2.8429 | 2.4479 |
| CIT542 | 3 | distal   | M  | WT | WT | 0.4262 | 2.7405 | 2.8353 | 2.8560 | 3.1405 | 2.6554 |
| CIT505 | 2 | distal   | M  | WT | WT | 0.4220 | 2.7598 | 2.8993 | 2.8083 | 2.9603 | 2.5049 |
| CIT454 | 2 | distal   | NA | WT | WT | 0.4119 | 2.7896 | 2.8547 | 2.8589 | 2.7996 | 2.3393 |
| CIT561 | 2 | distal   | M  | WT | WT | 0.4113 | 2.8273 | 2.8892 | 2.8204 | 2.8652 | 2.5464 |
| CIT452 | 2 | distal   | NA | WT | WT | 0.3997 | 2.7806 | 2.8247 | 2.8956 | 3.0555 | 2.4681 |
| CIT553 | 1 | distal   | WT | WT | WT | 0.3982 | 2.7474 | 2.9179 | 2.8182 | 2.4707 | 2.3576 |
| CIT448 | 2 | distal   | NA | WT | WT | 0.3950 | 2.7708 | 2.9126 | 2.8587 | 3.0849 | 2.6086 |
| CIT463 | 3 | distal   | M  | WT | WT | 0.3938 | 2.7907 | 2.8539 | 2.8076 | 2.9660 | 2.5368 |
| CIT453 | 2 | distal   | NA | WT | WT | 0.3923 | 2.7452 | 2.7973 | 2.8073 | 2.6058 | 2.2999 |
| CIT522 | 2 | distal   | M  | WT | WT | 0.3897 | 2.7266 | 2.8188 | 2.8264 | 3.0744 | 2.7701 |
| CIT565 | 2 | proximal | M  | WT | WT | 0.3756 | 2.7880 | 2.8753 | 2.8768 | 2.5999 | 2.1884 |
| CIT457 | 3 | distal   | M  | WT | WT | 0.3755 | 2.7688 | 2.7941 | 2.8336 | 2.4668 | 2.1039 |
| CIT495 | 2 | distal   | WT | WT | WT | 0.3668 | 2.8146 | 2.9455 | 2.7978 | 2.7680 | 2.2169 |

|        |   |          |    |    |    |        |        |        |        |        |        |
|--------|---|----------|----|----|----|--------|--------|--------|--------|--------|--------|
| CIT472 | 3 | distal   | M  | WT | WT | 0.3640 | 2.7492 | 2.8021 | 2.8193 | 2.0523 | 2.0172 |
| CIT504 | 2 | distal   | WT | WT | WT | 0.3638 | 2.7583 | 2.8331 | 2.8272 | 2.7079 | 2.4143 |
| CIT468 | 2 | distal   | M  | WT | WT | 0.3614 | 2.7362 | 2.8684 | 2.7921 | 2.8473 | 2.5034 |
| CIT478 | 2 | distal   | M  | WT | WT | 0.3582 | 2.7389 | 2.8681 | 2.8425 | 2.9660 | 2.6358 |
| CIT540 | 1 | distal   | WT | WT | WT | 0.3544 | 2.7477 | 2.8972 | 2.7944 | 1.8841 | 1.9405 |
| CIT467 | 2 | distal   | M  | WT | WT | 0.3502 | 2.7017 | 2.8002 | 2.8366 | 2.7644 | 2.2975 |
| CIT549 | 2 | distal   | WT | WT | WT | 0.3434 | 2.7687 | 2.8252 | 2.8202 | 2.7770 | 2.3759 |
| CIT479 | 3 | distal   | M  | WT | WT | 0.3409 | 2.7805 | 2.9442 | 2.8412 | 3.0091 | 2.5895 |
| CIT550 | 2 | distal   | M  | WT | WT | 0.3351 | 2.7459 | 2.8649 | 2.8001 | 2.5892 | 2.3106 |
| CIT563 | 2 | distal   | M  | WT | WT | 0.3328 | 2.7469 | 2.8115 | 2.8300 | 2.9716 | 2.6052 |
| CIT518 | 3 | distal   | M  | WT | WT | 0.3303 | 2.8117 | 2.8538 | 2.8457 | 2.9608 | 2.4574 |
| CIT520 | 3 | distal   | WT | WT | WT | 0.3217 | 2.7772 | 2.7461 | 2.8239 | 2.1287 | 2.0989 |
| CIT470 | 2 | proximal | M  | WT | WT | 0.3178 | 2.7490 | 2.8096 | 2.8204 | 2.7332 | 2.4634 |
| CIT564 | 3 | distal   | M  | WT | WT | 0.3062 | 2.7619 | 2.8086 | 2.8359 | 3.0533 | 2.6857 |
| CIT485 | 4 | distal   | WT | WT | WT | 0.3036 | 2.7432 | 2.7779 | 2.8180 | 2.6032 | 2.2146 |
| CIT487 | 2 | distal   | NA | WT | WT | 0.2974 | 2.7153 | 2.8235 | 2.8442 | 2.7245 | 2.6872 |
| CIT538 | 1 | distal   | WT | WT | WT | 0.2936 | 2.7744 | 2.8672 | 2.8242 | 2.5494 | 2.3968 |
| CIT483 | 4 | distal   | M  | WT | WT | 0.2928 | 2.7313 | 2.8494 | 2.7471 | 2.4668 | 2.1925 |
| CIT456 | 3 | proximal | M  | WT | NA | 0.2916 | 2.7866 | 2.8475 | 2.9086 | 2.7700 | 2.5337 |
| CIT546 | 2 | distal   | WT | WT | WT | 0.2825 | 2.7210 | 2.8251 | 2.8852 | 1.9497 | 1.9577 |
| CIT489 | 2 | proximal | NA | WT | WT | 0.2821 | 2.7671 | 2.8095 | 2.8631 | 2.7997 | 2.3482 |
| CIT477 | 3 | distal   | WT | WT | WT | 0.2801 | 2.8077 | 2.7929 | 2.8868 | 2.4347 | 2.1142 |
| CIT547 | 2 | distal   | WT | WT | WT | 0.2765 | 2.7535 | 2.7861 | 2.8320 | 2.8350 | 2.5240 |
| CIT464 | 3 | proximal | WT | WT | M  | 0.2604 | 2.7106 | 2.6748 | 2.8611 | 2.3189 | 2.2985 |
| CIT544 | 2 | proximal | NA | WT | WT | 0.2356 | 2.6994 | 2.6883 | 2.8167 | 2.1274 | 2.1819 |
| CIT492 | 2 | proximal | WT | WT | M  | 0.2295 | 2.7068 | 2.6939 | 2.9413 | 1.7927 | 2.1131 |
| CIT514 | 2 | proximal | M  | WT | WT | 0.2266 | 2.7246 | 2.7328 | 2.8184 | 2.5973 | 2.2288 |
| CIT515 | 1 | proximal | WT | WT | M  | 0.2252 | 2.7204 | 2.7280 | 2.8574 | 2.6188 | 2.5599 |
| CIT551 | 3 | proximal | WT | WT | M  | 0.2159 | 2.7223 | 2.7536 | 2.8439 | 2.3160 | 2.2265 |
| CIT499 | 3 | proximal | WT | WT | M  | 0.2081 | 2.7494 | 2.7303 | 2.9051 | 2.4892 | 2.0845 |
| CIT474 | 2 | proximal | WT | WT | WT | 0.1996 | 2.7900 | 2.7210 | 2.8591 | 2.6062 | 2.5007 |
| CIT450 | 2 | distal   | NA | WT | WT | 0.1942 | 2.7584 | 2.7866 | 2.8678 | 2.3076 | 2.3264 |
| CIT543 | 3 | proximal | WT | WT | WT | 0.1918 | 2.7780 | 2.7809 | 2.8930 | 3.0567 | 2.4635 |
| CIT503 | 2 | proximal | WT | WT | WT | 0.1844 | 2.8270 | 2.9317 | 2.8809 | 2.4666 | 2.4303 |
| CIT554 | 2 | distal   | WT | WT | WT | 0.1842 | 2.6798 | 2.8353 | 2.8791 | 1.8419 | 1.8963 |
| CIT516 | 2 | proximal | WT | WT | WT | 0.1801 | 2.7432 | 2.7999 | 2.9119 | 1.9698 | 1.9787 |
| CIT509 | 2 | proximal | NA | WT | WT | 0.1753 | 2.7808 | 2.8475 | 2.8892 | 1.7961 | 1.7529 |
| CIT491 | 2 | proximal | NA | WT | M  | 0.1739 | 2.7645 | 2.7390 | 2.9166 | 2.0024 | 2.3075 |
| CIT496 | 3 | proximal | WT | WT | M  | 0.1299 | 2.7487 | 2.7259 | 2.8878 | 1.8146 | 2.1753 |
| CIT482 | 4 | proximal | M  | WT | WT | 0.1243 | 2.7616 | 2.6367 | 2.8571 | 2.4380 | 2.0503 |
| CIT075 | 2 | distal   | NA | NA | NA | 0.5523 | 2.7265 | 2.8583 | 2.8152 | 2.5937 | 2.3071 |
| CIT170 | 2 | distal   | NA | NA | NA | 0.5429 | 2.7072 | 2.8675 | 2.7551 | 3.1008 | 2.7632 |
| CIT163 | 3 | distal   | NA | NA | NA | 0.5208 | 2.7292 | 2.9173 | 2.7504 | 2.9319 | 2.5502 |
| CIT152 | 3 | distal   | NA | NA | NA | 0.5115 | 2.7508 | 2.9016 | 2.8257 | 2.6982 | 2.3736 |
| CIT167 | 2 | proximal | NA | NA | NA | 0.4488 | 2.7608 | 2.9244 | 2.7875 | 3.1348 | 2.7845 |
| CIT166 | 3 | proximal | NA | NA | NA | 0.4437 | 2.6961 | 2.8586 | 2.7995 | 2.8334 | 2.4141 |
| CIT077 | 2 | distal   | NA | NA | NA | 0.4431 | 2.7344 | 2.9064 | 2.8123 | 3.0115 | 2.8072 |
| CIT150 | 3 | distal   | NA | NA | NA | 0.4104 | 2.8237 | 2.9741 | 2.9044 | 2.7464 | 2.3241 |
| CIT164 | 3 | proximal | NA | NA | NA | 0.3769 | 2.7974 | 2.8571 | 2.8257 | 2.9811 | 2.7519 |
| CIT292 | 2 | proximal | NA | NA | NA | 0.3747 | 2.7375 | 2.8705 | 2.8171 | 2.5957 | 2.2221 |
| CIT080 | 2 | proximal | NA | NA | NA | 0.3140 | 2.7309 | 2.8188 | 2.8247 | 2.7133 | 2.2411 |
| CIT157 | 3 | proximal | NA | NA | NA | 0.3083 | 2.7671 | 2.7780 | 2.8742 | 2.0330 | 2.1594 |
| CIT155 | 3 | distal   | NA | NA | NA | 0.2950 | 2.7312 | 2.7938 | 2.9019 | 2.4579 | 2.1590 |
| CIT154 | 3 | proximal | NA | NA | NA | 0.2781 | 2.7490 | 2.8296 | 2.8526 | 2.2417 | 2.2790 |
| CIT145 | 3 | distal   | NA | NA | NA | 0.2535 | 2.6664 | 2.6862 | 2.7923 | 2.3255 | 2.2192 |
| CIT146 | 3 | distal   | NA | NA | NA | 0.2358 | 2.6726 | 2.6828 | 2.7687 | 2.0955 | 2.2461 |
| CIT156 | 3 | proximal | NA | NA | NA | 0.1937 | 2.7878 | 2.7400 | 2.8471 | 1.9073 | 2.0250 |
| CIT268 | 3 | proximal | NA | NA | NA | 0.1792 | 2.7664 | 2.7867 | 2.8771 | 1.8784 | 2.0534 |
| CIT342 | 2 | proximal | NA | NA | NA | 0.1699 | 2.7719 | 2.8315 | 2.9274 | 2.2333 | 2.1742 |
| CIT541 | 3 | distal   | M  | NA | WT | 0.4518 | 2.7148 | 2.8998 | 2.8244 | 2.6825 | 2.6293 |
| CIT530 | 2 | proximal | WT | NA | WT | 0.3770 | 2.7729 | 2.9426 | 2.8953 | 2.1037 | 2.1390 |



|        |   |          |    |   |    |        |        |        |        |        |        |
|--------|---|----------|----|---|----|--------|--------|--------|--------|--------|--------|
| CIT186 | 3 | proximal | M  | M | WT | 0.5212 | 2.7343 | 2.8825 | 2.8314 | 2.6856 | 2.4961 |
| CIT407 | 3 | distal   | M  | M | WT | 0.4838 | 2.7867 | 2.8568 | 2.8514 | 2.9144 | 2.4922 |
| CIT061 | 3 | proximal | NA | M | WT | 0.4808 | 2.7080 | 2.8485 | 2.8280 | 2.9571 | 2.7046 |
| CIT085 | 2 | distal   | NA | M | WT | 0.4799 | 2.7608 | 2.8886 | 2.8527 | 3.0255 | 2.6399 |
| CIT333 | 4 | proximal | NA | M | WT | 0.4794 | 2.7212 | 2.8404 | 2.8143 | 3.1613 | 2.8656 |
| CIT315 | 3 | proximal | NA | M | WT | 0.4789 | 2.7504 | 2.9027 | 2.8665 | 2.9258 | 2.5356 |
| CIT363 | 2 | distal   | M  | M | WT | 0.4772 | 2.6853 | 2.8212 | 2.8196 | 2.8730 | 2.2165 |
| CIT436 | 2 | proximal | WT | M | WT | 0.4753 | 2.7627 | 2.8782 | 2.8835 | 2.7684 | 2.3800 |
| CIT010 | 3 | distal   | M  | M | WT | 0.4672 | 2.8298 | 2.9412 | 2.8364 | 3.0034 | 2.6346 |
| CIT113 | 2 | proximal | NA | M | WT | 0.4530 | 2.7732 | 2.8996 | 2.7697 | 2.3993 | 2.2139 |
| CIT139 | 2 | distal   | NA | M | WT | 0.4410 | 2.7948 | 2.8595 | 2.8921 | 3.1559 | 2.6839 |
| CIT276 | 4 | distal   | NA | M | WT | 0.4384 | 2.7653 | 2.8934 | 2.8279 | 2.8633 | 2.4612 |
| CIT217 | 2 | distal   | WT | M | WT | 0.4360 | 2.7525 | 2.8471 | 2.8276 | 2.6960 | 2.3618 |
| CIT362 | 2 | proximal | WT | M | WT | 0.4344 | 2.7711 | 2.9362 | 2.8934 | 2.9732 | 2.5562 |
| CIT001 | 4 | distal   | M  | M | WT | 0.4258 | 2.7904 | 2.9129 | 2.8622 | 2.5231 | 2.3224 |
| CIT383 | 3 | proximal | M  | M | WT | 0.4240 | 2.7899 | 2.9173 | 2.8731 | 2.9501 | 2.4922 |
| CIT295 | 4 | distal   | NA | M | WT | 0.4240 | 2.8300 | 2.8911 | 2.8855 | 2.3309 | 2.3848 |
| CIT364 | 3 | distal   | M  | M | WT | 0.4213 | 2.7143 | 2.8557 | 2.8664 | 3.0903 | 2.4661 |
| CIT287 | 2 | distal   | NA | M | WT | 0.4202 | 2.7963 | 2.9434 | 2.8463 | 2.8941 | 2.6288 |
| CIT237 | 3 | distal   | M  | M | WT | 0.4183 | 2.7685 | 2.9048 | 2.8613 | 2.5588 | 2.4181 |
| CIT078 | 2 | proximal | NA | M | WT | 0.4178 | 2.6935 | 2.8042 | 2.8110 | 2.5366 | 2.4198 |
| CIT175 | 2 | proximal | NA | M | WT | 0.4164 | 2.8107 | 2.8805 | 2.9032 | 2.9651 | 2.6610 |
| CIT430 | 2 | proximal | M  | M | WT | 0.4161 | 2.7406 | 2.8921 | 2.8249 | 2.7876 | 2.2025 |
| CIT092 | 4 | distal   | NA | M | WT | 0.4160 | 2.7451 | 2.8817 | 2.8673 | 2.9966 | 2.6249 |
| CIT294 | 3 | distal   | NA | M | WT | 0.4148 | 2.7795 | 2.9553 | 2.8602 | 2.7755 | 2.3144 |
| CIT416 | 3 | proximal | M  | M | WT | 0.4123 | 2.7454 | 2.8762 | 2.8537 | 2.7968 | 2.2609 |
| CIT221 | 2 | proximal | M  | M | WT | 0.4098 | 2.7010 | 2.8270 | 2.8225 | 2.3047 | 2.1887 |
| CIT316 | 4 | proximal | NA | M | WT | 0.4081 | 2.7400 | 2.8856 | 2.8220 | 2.8590 | 2.5004 |
| CIT406 | 3 | proximal | M  | M | WT | 0.4074 | 2.7939 | 2.9121 | 2.8575 | 2.7956 | 2.2987 |
| CIT296 | 4 | proximal | NA | M | WT | 0.4031 | 2.7835 | 2.8775 | 2.8614 | 2.5810 | 2.3622 |
| CIT219 | 3 | distal   | WT | M | WT | 0.4023 | 2.7528 | 2.9009 | 2.8221 | 2.6485 | 2.3774 |
| CIT301 | 2 | distal   | NA | M | WT | 0.3974 | 2.6968 | 2.7915 | 2.7898 | 2.9318 | 2.3972 |
| CIT368 | 2 | distal   | WT | M | WT | 0.3969 | 2.8048 | 2.9913 | 2.8483 | 2.5633 | 2.4512 |
| CIT411 | 3 | distal   | M  | M | WT | 0.3967 | 2.7672 | 2.8314 | 2.8611 | 2.5025 | 2.1529 |
| CIT328 | 4 | distal   | NA | M | WT | 0.3967 | 2.7040 | 2.8652 | 2.7868 | 2.0659 | 1.9245 |
| CIT261 | 4 | distal   | M  | M | WT | 0.3960 | 2.7994 | 2.9164 | 2.8804 | 2.4346 | 2.2184 |
| CIT437 | 2 | proximal | WT | M | WT | 0.3957 | 2.8265 | 2.9948 | 2.8170 | 2.7255 | 2.5014 |
| CIT279 | 3 | distal   | NA | M | WT | 0.3946 | 2.8226 | 2.8944 | 2.8629 | 2.6220 | 2.3020 |
| CIT387 | 2 | proximal | M  | M | WT | 0.3940 | 2.7759 | 2.9581 | 2.8483 | 2.3734 | 2.4184 |
| CIT192 | 3 | distal   | M  | M | NA | 0.3935 | 2.7088 | 2.8285 | 2.8108 | 2.4178 | 2.2376 |
| CIT293 | 1 | proximal | NA | M | WT | 0.3919 | 2.7723 | 2.9271 | 2.8413 | 2.7906 | 2.4395 |
| CIT242 | 3 | distal   | M  | M | WT | 0.3904 | 2.7382 | 2.8697 | 2.8363 | 3.1637 | 2.6803 |
| CIT216 | 2 | proximal | M  | M | WT | 0.3888 | 2.7679 | 2.9058 | 2.9118 | 2.5805 | 2.3473 |
| CIT426 | 2 | proximal | M  | M | WT | 0.3867 | 2.7878 | 2.9414 | 2.8357 | 2.7692 | 2.4554 |
| CIT136 | 2 | distal   | NA | M | WT | 0.3830 | 2.7911 | 2.8290 | 2.8805 | 2.7165 | 2.0646 |
| CIT048 | 4 | proximal | M  | M | WT | 0.3811 | 2.7851 | 2.9467 | 2.8997 | 3.0718 | 2.7128 |
| CIT096 | 2 | distal   | NA | M | WT | 0.3804 | 2.7716 | 2.8572 | 2.8160 | 2.7046 | 2.2782 |
| CIT304 | 4 | distal   | NA | M | WT | 0.3790 | 2.8008 | 2.8605 | 2.9043 | 2.8828 | 2.6193 |
| CIT196 | 3 | proximal | WT | M | NA | 0.3783 | 2.7477 | 2.9267 | 2.7818 | 2.7485 | 2.3286 |
| CIT441 | 2 | distal   | M  | M | WT | 0.3731 | 2.7281 | 2.8660 | 2.7658 | 2.7495 | 2.4619 |
| CIT419 | 3 | proximal | WT | M | WT | 0.3731 | 2.7923 | 2.9212 | 2.8953 | 2.6849 | 2.3903 |
| CIT171 | 2 | distal   | NA | M | WT | 0.3729 | 2.7177 | 2.8151 | 2.8126 | 2.7611 | 2.2019 |
| CIT202 | 3 | proximal | M  | M | NA | 0.3654 | 2.7703 | 2.7925 | 2.8411 | 2.7736 | 2.3193 |
| CIT346 | 3 | proximal | WT | M | WT | 0.3652 | 2.7181 | 2.8241 | 2.8104 | 2.7694 | 2.4293 |
| CIT259 | 3 | proximal | M  | M | WT | 0.3637 | 2.8095 | 2.8968 | 2.8807 | 2.7236 | 2.4547 |
| CIT108 | 4 | distal   | NA | M | WT | 0.3602 | 2.7775 | 2.8178 | 2.8980 | 2.0121 | 1.8401 |
| CIT047 | 4 | proximal | WT | M | WT | 0.3600 | 2.7124 | 2.8340 | 2.8458 | 2.7752 | 2.3772 |
| CIT072 | 3 | proximal | NA | M | WT | 0.3532 | 2.7609 | 2.9044 | 2.8713 | 2.7442 | 2.4241 |
| CIT195 | 3 | distal   | WT | M | NA | 0.3516 | 2.7542 | 2.8934 | 2.8060 | 2.4096 | 2.1819 |
| CIT106 | 2 | distal   | NA | M | WT | 0.3502 | 2.7510 | 2.8409 | 2.8411 | 2.8808 | 2.3839 |

|        |   |          |    |   |    |        |        |        |        |        |        |
|--------|---|----------|----|---|----|--------|--------|--------|--------|--------|--------|
| CIT066 | 3 | proximal | NA | M | WT | 0.3498 | 2.7550 | 2.9331 | 2.8612 | 2.9299 | 2.3562 |
| CIT198 | 3 | distal   | M  | M | NA | 0.3477 | 2.7811 | 2.9267 | 2.8682 | 2.1497 | 2.4200 |
| CIT125 | 2 | distal   | NA | M | WT | 0.3474 | 2.7608 | 2.9074 | 2.8156 | 2.8072 | 2.3186 |
| CIT232 | 3 | distal   | WT | M | WT | 0.3465 | 2.7140 | 2.8768 | 2.8207 | 2.4143 | 2.2530 |
| CIT392 | 2 | distal   | WT | M | WT | 0.3456 | 2.7977 | 2.9075 | 2.8424 | 2.3546 | 2.4247 |
| CIT326 | 1 | distal   | NA | M | WT | 0.3433 | 2.7814 | 2.8635 | 2.8887 | 2.5663 | 2.5009 |
| CIT263 | 4 | distal   | M  | M | WT | 0.3414 | 2.7545 | 2.8960 | 2.8605 | 2.5632 | 2.4243 |
| CIT236 | 2 | proximal | M  | M | WT | 0.3393 | 2.7766 | 2.8389 | 2.8329 | 1.9671 | 1.9563 |
| CIT399 | 2 | distal   | M  | M | WT | 0.3362 | 2.7574 | 2.8214 | 2.8603 | 2.5586 | 2.3663 |
| CIT095 | 4 | distal   | NA | M | WT | 0.3335 | 2.7789 | 2.7813 | 2.8300 | 2.9610 | 2.5427 |
| CIT366 | 2 | distal   | WT | M | WT | 0.3331 | 2.7520 | 2.9102 | 2.8651 | 1.8813 | 1.9347 |
| CIT289 | 4 | distal   | NA | M | WT | 0.3325 | 2.7532 | 2.8792 | 2.8214 | 2.1151 | 2.0177 |
| CIT162 | 3 | distal   | NA | M | WT | 0.3296 | 2.7564 | 2.8587 | 2.8508 | 2.2610 | 2.1246 |
| CIT225 | 3 | proximal | WT | M | WT | 0.3286 | 2.8064 | 2.8181 | 2.9149 | 2.4254 | 1.9434 |
| CIT112 | 2 | distal   | NA | M | WT | 0.3286 | 2.8261 | 2.8441 | 2.9049 | 2.5935 | 2.2446 |
| CIT138 | 2 | proximal | NA | M | WT | 0.3237 | 2.7967 | 2.8688 | 2.8224 | 2.6259 | 2.4035 |
| CIT176 | 2 | distal   | NA | M | WT | 0.3234 | 2.8208 | 2.9513 | 2.8946 | 2.6608 | 2.2480 |
| CIT107 | 2 | distal   | NA | M | WT | 0.3183 | 2.8005 | 2.9113 | 2.8516 | 2.6947 | 2.3651 |
| CIT348 | 2 | distal   | WT | M | WT | 0.3181 | 2.7261 | 2.8601 | 2.8604 | 2.6848 | 2.4155 |
| CIT210 | 3 | distal   | WT | M | NA | 0.3154 | 2.7700 | 2.8772 | 2.8775 | 2.7894 | 2.3270 |
| CIT339 | 3 | proximal | NA | M | WT | 0.3120 | 2.7465 | 2.8481 | 2.8293 | 2.9040 | 2.5477 |
| CIT098 | 2 | proximal | NA | M | WT | 0.3083 | 2.8271 | 2.9148 | 2.9214 | 2.6592 | 2.4048 |
| CIT054 | 4 | distal   | WT | M | WT | 0.3070 | 2.7887 | 2.8529 | 2.8500 | 2.8631 | 2.5869 |
| CIT205 | 2 | distal   | WT | M | NA | 0.3062 | 2.7587 | 2.8414 | 2.8671 | 2.6335 | 2.3303 |
| CIT042 | 3 | proximal | WT | M | WT | 0.3059 | 2.6722 | 2.7390 | 2.7869 | 2.6597 | 2.1011 |
| CIT424 | 3 | proximal | M  | M | WT | 0.3057 | 2.8054 | 2.8790 | 2.8685 | 2.2606 | 2.3749 |
| CIT121 | 2 | distal   | NA | M | WT | 0.3055 | 2.7829 | 2.8592 | 2.8847 | 2.2223 | 2.2212 |
| CIT423 | 3 | distal   | M  | M | WT | 0.3027 | 2.6932 | 2.8361 | 2.8735 | 1.8174 | 1.9310 |
| CIT335 | 3 | distal   | NA | M | WT | 0.3015 | 2.7206 | 2.8577 | 2.8913 | 2.5614 | 2.2022 |
| CIT091 | 2 | proximal | NA | M | WT | 0.2992 | 2.8800 | 2.9915 | 2.8853 | 2.7466 | 2.5476 |
| CIT354 | 3 | proximal | M  | M | WT | 0.2985 | 2.7751 | 2.8226 | 2.8564 | 2.8727 | 2.5864 |
| CIT009 | 2 | distal   | WT | M | WT | 0.2932 | 2.7536 | 2.9083 | 2.8747 | 2.5130 | 2.1184 |
| CIT397 | 2 | proximal | WT | M | WT | 0.2929 | 2.8300 | 2.8681 | 2.8250 | 2.9433 | 2.4724 |
| CIT022 | 1 | proximal | M  | M | WT | 0.2924 | 2.7967 | 2.9134 | 2.8676 | 2.9762 | 2.5542 |
| CIT056 | 4 | proximal | WT | M | WT | 0.2911 | 2.7509 | 2.8803 | 2.8056 | 2.3424 | 2.2950 |
| CIT239 | 2 | proximal | WT | M | WT | 0.2888 | 2.7202 | 2.8526 | 2.8469 | 2.0090 | 2.2451 |
| CIT147 | 3 | distal   | NA | M | WT | 0.2872 | 2.7759 | 2.8829 | 2.8654 | 2.3422 | 2.1998 |
| CIT250 | 2 | distal   | WT | M | WT | 0.2821 | 2.7853 | 2.8385 | 2.8166 | 2.1176 | 2.2962 |
| CIT257 | 4 | distal   | M  | M | WT | 0.2805 | 2.7942 | 2.8812 | 2.8453 | 2.0534 | 2.1418 |
| CIT033 | 1 | proximal | WT | M | WT | 0.2772 | 2.8013 | 2.9165 | 2.9149 | 1.9904 | 2.3127 |
| CIT135 | 2 | distal   | NA | M | WT | 0.2756 | 2.7449 | 2.8844 | 2.8587 | 2.4222 | 2.2628 |
| CIT117 | 2 | proximal | NA | M | WT | 0.2704 | 2.8185 | 2.8877 | 2.8868 | 2.6694 | 2.3404 |
| CIT018 | 4 | distal   | M  | M | WT | 0.2693 | 2.7622 | 2.8560 | 2.8623 | 2.2183 | 2.1459 |
| CIT165 | 3 | distal   | NA | M | WT | 0.2684 | 2.6844 | 2.7682 | 2.8575 | 2.0842 | 2.2080 |
| CIT199 | 3 | distal   | M  | M | NA | 0.2672 | 2.7822 | 2.9208 | 2.8637 | 2.9251 | 2.6211 |
| CIT081 | 2 | proximal | NA | M | WT | 0.2672 | 2.7814 | 2.8366 | 2.8717 | 2.8967 | 2.4073 |
| CIT014 | 1 | proximal | WT | M | WT | 0.2665 | 2.7001 | 2.7903 | 2.8029 | 2.0416 | 1.8936 |
| CIT049 | 4 | proximal | M  | M | WT | 0.2657 | 2.6796 | 2.8003 | 2.8246 | 2.0757 | 2.1270 |
| CIT046 | 3 | distal   | M  | M | WT | 0.2642 | 2.7441 | 2.7794 | 2.8814 | 2.2737 | 2.1986 |
| CIT389 | 3 | proximal | WT | M | WT | 0.2630 | 2.7837 | 2.8942 | 2.9356 | 2.6080 | 2.5442 |
| CIT240 | 2 | proximal | WT | M | WT | 0.2616 | 2.7936 | 2.8922 | 2.9557 | 1.9933 | 1.9769 |
| CIT256 | 4 | distal   | M  | M | WT | 0.2598 | 2.7298 | 2.7988 | 2.9043 | 2.9505 | 2.6382 |
| CIT144 | 3 | proximal | NA | M | WT | 0.2587 | 2.7263 | 2.7684 | 2.8896 | 2.4890 | 2.5293 |
| CIT053 | 4 | distal   | M  | M | WT | 0.2547 | 2.7712 | 2.7990 | 2.8441 | 2.3078 | 2.4710 |
| CIT067 | 3 | distal   | NA | M | WT | 0.2540 | 2.7913 | 2.8859 | 2.8908 | 2.1877 | 2.3221 |
| CIT114 | 2 | distal   | NA | M | WT | 0.2530 | 2.6994 | 2.8034 | 2.8007 | 2.5050 | 2.2997 |
| CIT141 | 3 | proximal | NA | M | WT | 0.2529 | 2.7100 | 2.6379 | 2.8720 | 2.0951 | 1.9765 |
| CIT148 | 3 | proximal | NA | M | WT | 0.2500 | 2.8418 | 2.9130 | 2.9131 | 2.6386 | 2.3842 |
| CIT086 | 2 | proximal | NA | M | WT | 0.2492 | 2.7288 | 2.8571 | 2.8387 | 2.2188 | 2.2983 |
| CIT235 | 3 | distal   | WT | M | WT | 0.2458 | 2.7511 | 2.8873 | 2.8617 | 2.5490 | 2.3567 |
| CIT434 | 3 | proximal | M  | M | WT | 0.2457 | 2.7066 | 2.7656 | 2.8797 | 2.2877 | 2.4141 |

|        |   |          |    |   |    |        |        |        |        |        |        |
|--------|---|----------|----|---|----|--------|--------|--------|--------|--------|--------|
| CIT222 | 3 | proximal | WT | M | WT | 0.2436 | 2.7539 | 2.9372 | 2.8854 | 1.9350 | 1.8505 |
| CIT438 | 3 | distal   | M  | M | WT | 0.2436 | 2.7788 | 2.8210 | 2.8559 | 2.5240 | 2.3600 |
| CIT374 | 2 | proximal | WT | M | WT | 0.2435 | 2.7941 | 2.8865 | 2.8965 | 2.4132 | 2.2793 |
| CIT089 | 4 | proximal | NA | M | WT | 0.2413 | 2.7424 | 2.8739 | 2.9029 | 2.2044 | 2.4430 |
| CIT012 | 2 | proximal | M  | M | WT | 0.2411 | 2.7557 | 2.6930 | 2.9384 | 2.0743 | 2.0036 |
| CIT286 | 1 | proximal | NA | M | WT | 0.2409 | 2.8489 | 2.9836 | 2.8526 | 2.4194 | 2.1174 |
| CIT034 | 1 | proximal | WT | M | WT | 0.2407 | 2.7539 | 2.8560 | 2.8518 | 2.8639 | 2.4234 |
| CIT341 | 1 | proximal | NA | M | WT | 0.2360 | 2.7756 | 2.8122 | 2.8841 | 2.4260 | 2.4744 |
| CIT230 | 3 | proximal | WT | M | WT | 0.2358 | 2.7829 | 2.7928 | 2.8881 | 1.8871 | 2.0755 |
| CIT142 | 3 | distal   | NA | M | WT | 0.2347 | 2.6577 | 2.7359 | 2.8512 | 2.0755 | 2.3180 |
| CIT173 | 2 | distal   | NA | M | WT | 0.2336 | 2.7178 | 2.7543 | 2.7984 | 2.8383 | 2.5263 |
| CIT037 | 2 | distal   | WT | M | WT | 0.2297 | 2.8113 | 2.8954 | 2.8747 | 2.4415 | 2.4740 |
| CIT094 | 2 | distal   | NA | M | WT | 0.2296 | 2.7314 | 2.8755 | 2.8793 | 2.0262 | 2.2662 |
| CIT015 | 4 | proximal | WT | M | WT | 0.2279 | 2.7807 | 2.8823 | 2.8618 | 2.6996 | 2.4573 |
| CIT370 | 2 | distal   | M  | M | WT | 0.2251 | 2.7528 | 2.8992 | 2.8890 | 2.2004 | 2.1027 |
| CIT337 | 1 | proximal | NA | M | WT | 0.2244 | 2.8487 | 2.8911 | 2.8871 | 2.2511 | 2.5855 |
| CIT025 | 2 | proximal | WT | M | WT | 0.2233 | 2.7263 | 2.7633 | 2.8315 | 1.9215 | 1.9867 |
| CIT317 | 1 | distal   | NA | M | WT | 0.2231 | 2.7018 | 2.8624 | 2.8407 | 1.9138 | 2.0325 |
| CIT313 | 1 | proximal | NA | M | WT | 0.2223 | 2.7102 | 2.7738 | 2.7933 | 2.0933 | 2.0547 |
| CIT359 | 1 | distal   | WT | M | WT | 0.2218 | 2.7727 | 2.8595 | 2.9050 | 2.7045 | 2.5279 |
| CIT026 | 3 | proximal | M  | M | WT | 0.2215 | 2.8129 | 2.7738 | 2.9390 | 2.3423 | 2.2373 |
| CIT179 | 2 | distal   | M  | M | NA | 0.2202 | 2.6298 | 2.7489 | 2.8503 | 1.8844 | 1.8742 |
| CIT203 | 3 | proximal | WT | M | WT | 0.2193 | 2.7859 | 2.8748 | 2.8980 | 2.1978 | 2.3394 |
| CIT184 | 2 | distal   | WT | M | NA | 0.2132 | 2.8005 | 2.8725 | 2.8478 | 2.6433 | 2.2563 |
| CIT369 | 3 | proximal | WT | M | WT | 0.2069 | 2.7940 | 2.8303 | 2.8524 | 2.4668 | 2.3556 |
| CIT021 | 3 | proximal | WT | M | WT | 0.2039 | 2.7591 | 2.7482 | 2.8929 | 2.0864 | 2.1631 |
| CIT093 | 2 | proximal | NA | M | WT | 0.2036 | 2.7596 | 2.8377 | 2.8785 | 1.9840 | 2.2148 |
| CIT409 | 3 | proximal | M  | M | WT | 0.2028 | 2.8132 | 2.7254 | 2.9461 | 2.6115 | 2.3498 |
| CIT340 | 1 | distal   | NA | M | WT | 0.2028 | 2.7615 | 2.8973 | 2.8745 | 2.0407 | 2.2272 |
| CIT312 | 3 | distal   | NA | M | WT | 0.1998 | 2.7156 | 2.7788 | 2.8130 | 2.0253 | 1.9486 |
| CIT303 | 2 | distal   | NA | M | WT | 0.1936 | 2.7042 | 2.7937 | 2.8261 | 1.9124 | 1.9104 |
| CIT227 | 3 | distal   | M  | M | WT | 0.1878 | 2.7029 | 2.7846 | 2.8895 | 1.8567 | 1.9444 |
| CIT273 | 2 | distal   | NA | M | WT | 0.1867 | 2.7872 | 2.8557 | 2.8883 | 2.4983 | 2.4753 |
| CIT011 | 2 | proximal | WT | M | WT | 0.1852 | 2.6954 | 2.7315 | 2.8745 | 2.0514 | 2.1803 |
| CIT059 | 2 | distal   | WT | M | WT | 0.1822 | 2.7526 | 2.7789 | 3.0129 | 2.4220 | 2.2704 |
| CIT320 | 3 | proximal | NA | M | WT | 0.1815 | 2.7602 | 2.7263 | 2.9287 | 2.1169 | 2.1162 |
| CIT029 | 1 | proximal | WT | M | WT | 0.1799 | 2.7496 | 2.9235 | 2.8423 | 1.9975 | 2.0480 |
| CIT393 | 3 | proximal | WT | M | WT | 0.1770 | 2.7899 | 2.7191 | 2.8922 | 2.1994 | 2.0835 |
| CIT324 | 2 | proximal | NA | M | WT | 0.1753 | 2.7700 | 2.7891 | 2.9262 | 2.1492 | 2.1248 |
| CIT405 | 3 | distal   | M  | M | WT | 0.1721 | 2.8019 | 2.6569 | 2.9575 | 2.3173 | 2.0395 |
| CIT410 | 3 | proximal | WT | M | WT | 0.1684 | 2.7429 | 2.8122 | 2.8601 | 1.9331 | 2.0288 |
| CIT271 | 4 | proximal | NA | M | WT | 0.1597 | 2.7030 | 2.8033 | 2.7899 | 1.8360 | 2.1717 |
| CIT262 | 4 | proximal | WT | M | WT | 0.1531 | 2.7373 | 2.8561 | 2.8864 | 2.1183 | 2.3460 |
| CIT330 | 2 | proximal | NA | M | WT | 0.1521 | 2.7481 | 2.8242 | 2.9201 | 2.0326 | 2.1135 |
| CIT126 | 2 | distal   | NA | M | WT | 0.1513 | 2.7634 | 2.7825 | 2.8914 | 2.3145 | 2.1830 |
| CIT124 | 2 | distal   | NA | M | WT | 0.1406 | 2.7383 | 2.7413 | 2.8899 | 2.1722 | 2.1201 |
| CIT433 | 2 | proximal | WT | M | WT | 0.1342 | 2.7277 | 2.8269 | 2.8133 | 2.0051 | 1.9752 |
| CIT270 | 2 | proximal | NA | M | WT | 0.1298 | 2.7358 | 2.7919 | 2.8860 | 1.8262 | 2.1338 |
| CIT408 | 3 | proximal | M  | M | WT | 0.1217 | 2.7320 | 2.7863 | 2.8570 | 1.8827 | 1.9047 |
| CIT344 | 1 | proximal | NA | M | WT | 0.1180 | 2.7135 | 2.7675 | 2.8291 | 1.8918 | 2.0791 |
| CIT190 | 3 | distal   | M  | M | NA | 0.1089 | 2.7363 | 2.7845 | 2.8877 | 2.1742 | 2.3994 |
| CIT455 | 3 | distal   | M  | M | NA | 0.5256 | 2.7508 | 2.8875 | 2.8404 | 2.9718 | 2.4265 |
| CIT557 | 3 | proximal | M  | M | WT | 0.4913 | 2.7127 | 2.8198 | 2.8570 | 2.6269 | 2.1633 |
| CIT510 | 3 | proximal | M  | M | WT | 0.4712 | 2.8278 | 2.9251 | 2.8306 | 3.0496 | 2.5260 |
| CIT529 | 2 | proximal | WT | M | WT | 0.4619 | 2.7760 | 2.9674 | 2.8477 | 3.0782 | 2.6727 |
| CIT506 | 1 | distal   | M  | M | WT | 0.4375 | 2.7967 | 2.9256 | 2.8697 | 2.5970 | 2.1448 |
| CIT480 | 2 | distal   | M  | M | WT | 0.4296 | 2.7428 | 2.8620 | 2.9013 | 2.9806 | 2.3853 |
| CIT513 | 1 | distal   | WT | M | WT | 0.4075 | 2.7686 | 2.8480 | 2.8807 | 2.4317 | 2.2466 |
| CIT552 | 1 | distal   | M  | M | WT | 0.3852 | 2.7565 | 2.8923 | 2.8217 | 3.0194 | 2.6018 |
| CIT548 | 3 | distal   | WT | M | WT | 0.3792 | 2.7749 | 2.8848 | 2.8570 | 2.8773 | 2.5295 |
| CIT459 | 3 | distal   | M  | M | NA | 0.3760 | 2.7644 | 2.9079 | 2.8574 | 3.1135 | 2.7365 |

|        |   |          |    |   |    |        |        |        |        |        |        |
|--------|---|----------|----|---|----|--------|--------|--------|--------|--------|--------|
| CIT537 | 2 | proximal | WT | M | WT | 0.3716 | 2.7221 | 2.8096 | 2.8582 | 3.0868 | 2.6574 |
| CIT498 | 1 | distal   | M  | M | WT | 0.3672 | 2.7596 | 2.8621 | 2.7900 | 2.7499 | 2.4388 |
| CIT466 | 2 | proximal | WT | M | WT | 0.3613 | 2.8038 | 2.8579 | 2.8816 | 2.3293 | 2.1656 |
| CIT560 | 2 | distal   | WT | M | WT | 0.3487 | 2.7492 | 2.9153 | 2.8967 | 2.8778 | 2.5823 |
| CIT521 | 2 | proximal | M  | M | WT | 0.3433 | 2.7315 | 2.7708 | 2.8822 | 2.9566 | 2.2867 |
| CIT562 | 3 | proximal | M  | M | WT | 0.3342 | 2.7436 | 2.8476 | 2.8579 | 2.5515 | 2.2338 |
| CIT486 | 4 | distal   | WT | M | WT | 0.3223 | 2.7263 | 2.8604 | 2.8342 | 2.9073 | 2.3317 |
| CIT475 | 3 | proximal | WT | M | WT | 0.3215 | 2.7923 | 2.8974 | 2.8506 | 2.8845 | 2.6006 |
| CIT476 | 3 | distal   | M  | M | WT | 0.3106 | 2.7607 | 2.8784 | 2.9102 | 2.4453 | 2.1137 |
| CIT493 | 3 | proximal | M  | M | WT | 0.3104 | 2.7867 | 2.8491 | 2.8429 | 2.5822 | 2.3615 |
| CIT511 | 3 | distal   | M  | M | WT | 0.3021 | 2.7929 | 2.7826 | 2.8598 | 2.8279 | 2.1789 |
| CIT460 | 2 | distal   | M  | M | WT | 0.3002 | 2.7829 | 2.8436 | 2.8507 | 2.7191 | 2.3250 |
| CIT446 | 2 | proximal | NA | M | WT | 0.2840 | 2.7988 | 2.9003 | 2.9459 | 2.4961 | 2.0951 |
| CIT484 | 2 | distal   | M  | M | WT | 0.2762 | 2.8267 | 2.8065 | 2.8840 | 2.5908 | 2.5291 |
| CIT502 | 2 | proximal | WT | M | WT | 0.2748 | 2.7874 | 2.8434 | 2.8630 | 2.2814 | 2.1296 |
| CIT473 | 3 | distal   | M  | M | WT | 0.2722 | 2.7038 | 2.8065 | 2.8475 | 2.4034 | 2.2188 |
| CIT524 | 2 | proximal | WT | M | WT | 0.2680 | 2.7735 | 2.9277 | 2.8955 | 2.0693 | 2.0219 |
| CIT556 | 3 | proximal | WT | M | WT | 0.2604 | 2.8038 | 2.8933 | 2.8951 | 2.0455 | 2.3184 |
| CIT469 | 3 | proximal | WT | M | WT | 0.2572 | 2.7875 | 2.8818 | 2.9016 | 2.0899 | 2.2609 |
| CIT566 | 2 | proximal | WT | M | WT | 0.2569 | 2.7121 | 2.7042 | 2.8931 | 2.0622 | 2.2800 |
| CIT444 | 4 | distal   | M  | M | WT | 0.2496 | 2.7328 | 2.7485 | 2.8474 | 2.6570 | 2.5520 |
| CIT447 | 2 | proximal | NA | M | WT | 0.2414 | 2.7747 | 2.8414 | 2.9253 | 2.2666 | 2.2518 |
| CIT517 | 2 | distal   | WT | M | WT | 0.2269 | 2.7774 | 2.8534 | 2.8780 | 2.4187 | 2.2412 |
| CIT507 | 3 | proximal | WT | M | WT | 0.2241 | 2.7418 | 2.8651 | 2.8756 | 1.9520 | 2.2136 |
| CIT490 | 3 | proximal | NA | M | WT | 0.2227 | 2.7678 | 2.8332 | 2.8651 | 2.1207 | 2.3916 |
| CIT497 | 3 | proximal | WT | M | WT | 0.2209 | 2.7267 | 2.8395 | 2.8576 | 2.1679 | 2.2185 |
| CIT488 | 3 | proximal | NA | M | WT | 0.2095 | 2.8132 | 2.6627 | 2.9309 | 2.7723 | 2.4638 |
| CIT531 | 2 | distal   | WT | M | WT | 0.2088 | 2.7307 | 2.8092 | 2.8452 | 1.8437 | 2.1032 |
| CIT445 | 2 | proximal | NA | M | WT | 0.2035 | 2.7455 | 2.6545 | 2.8738 | 2.8984 | 2.3043 |
| CIT533 | 2 | proximal | WT | M | WT | 0.1994 | 2.8182 | 2.9104 | 2.8687 | 2.0883 | 2.2968 |
| CIT501 | 3 | distal   | WT | M | WT | 0.1961 | 2.7783 | 2.8923 | 2.8774 | 2.1838 | 2.3090 |
| CIT519 | 2 | distal   | WT | M | WT | 0.1805 | 2.6936 | 2.8099 | 2.8483 | 2.0636 | 1.9800 |
| CIT532 | 2 | proximal | WT | M | WT | 0.1674 | 2.7809 | 2.8517 | 2.8822 | 2.4638 | 2.3109 |
| CIT523 | 3 | proximal | WT | M | WT | 0.1430 | 2.7980 | 2.6787 | 2.9006 | 2.3620 | 2.4991 |
| CIT526 | 2 | proximal | WT | M | WT | 0.1099 | 2.7830 | 2.8049 | 2.8837 | 1.7594 | 2.0966 |

**Supplementary Table S7. Julien et al. (2012) cetuximab-treated CRC PDX models (n=52) (9)---cetuximab response (CR/PR/SD/PD), MSI and APC/TP53/KRAS/BRAF mutation status**

**Note:** The molecular parameters were adopted from “Figure 2” (9). 1 – mut; 0 – wt; A – APC mutation; P – TP53 mutation; K – KRAS mutation; B – BRAF(V600E); CR---complete response; PR---partial response; SD---stable disease; PD---progressed disease

| PDX Model Code | Cetuximab response score | "CR/PR/SD/PD" | MSI_H | APC | TP53 | KRAS | BRAF | A/P/K/B |
|----------------|--------------------------|---------------|-------|-----|------|------|------|---------|
| CR-IC-0002P    | +++                      | CR/PR         | 0     | 1   | 1    | 0    | 0    | AP      |
| CR-IC-0003P    | +++                      | CR/PR         | 0     | 1   | 1    | 0    | 0    | AP      |
| CR-IC-0004M    | ++                       | SD            | 0     | 1   | 1    | 1    | 0    | APK     |
| CR-IC-0005P    | +                        | PD            | 0     | 0   | 0    | 0    | 0    | WT      |
| CR-IC-0006M    | +++                      | CR/PR         | 0     | 0   | 1    | 0    | 0    | P       |
| CR-IC-0007M    | +++                      | CR/PR         | 0     | 1   | 1    | 1    | 0    | APK     |
| CR-IC-0008P    | -                        | PD            | 0     | 1   | 0    | 0    | 0    | A       |
| CR-IC-0009M    | -                        | PD            | 0     | 1   | 0    | 0    | 0    | A       |
| CR-IC-0010P    | -                        | PD            | 0     | 1   | 0    | 0    | 0    | A       |
| CR-IC-0013M    | +++                      | CR/PR         | 0     | 1   | 0    | 1    | 1    | AKB     |
| CR-IC-0016M    | +                        | PD            | 0     | 0   | 1    | 0    | 0    | P       |
| CR-IC-0019P    | +++                      | CR/PR         | 0     | 0   | 1    | 0    | 0    | P       |
| CR-IC-0020P    | +++                      | CR/PR         | 0     | 1   | 1    | 0    | 0    | AP      |
| CR-IC-0021M    | +++                      | CR/PR         | 0     | 1   | 1    | 0    | 0    | AP      |
| CR-IC-0022P    | -                        | PD            | 0     | 1   | 1    | 0    | 0    | AP      |
| CR-IC-0025M    | +++                      | CR/PR         | 0     | 1   | 1    | 0    | 0    | AP      |
| CR-IC-0028M    | -                        | PD            | 0     | 0   | 1    | 0    | 0    | P       |
| CR-IC-0029P    | -                        | PD            | 0     | 0   | 1    | 0    | 0    | P       |
| CR-IC-0032P    | +++                      | CR/PR         | 0     | 1   | 1    | 0    | 0    | AP      |
| CR-IGR-0002C   | ++                       | SD            | 0     | 0   | 1    | 0    | 0    | P       |
| CR-IGR-0002P   | ++                       | SD            | 0     | 0   | 1    | 0    | 0    | P       |
| CR-IGR-0003P   | +++                      | CR/PR         | 0     | 0   | 1    | 1    | 0    | PK      |
| CR-IGR-0007P   | +                        | PD            | 0     | 1   | 1    | 1    | 0    | APK     |
| CR-IGR-0008P   | -                        | PD            | 0     | 1   | 1    | 0    | 0    | AP      |
| CR-IGR-0009P   | -                        | PD            | 0     | 0   | 1    | 1    | 0    | PK      |
| CR-IGR-0011C   | -                        | PD            | 0     | 0   | 0    | 1    | 0    | K       |
| CR-IGR-0012P   | -                        | PD            | 0     | 1   | 0    | 1    | 0    | AK      |
| CR-IGR-0014P   | -                        | PD            | 0     | 1   | 0    | 1    | 0    | AK      |
| CR-IGR-0016P   | -                        | PD            | 0     | 0   | 1    | 1    | 0    | PK      |
| CR-IGR-0023M   | +                        | PD            | 0     | 1   | 1    | 1    | 0    | APK     |
| CR-IGR-0025P   | -                        | PD            | 0     | 1   | 1    | 1    | 0    | APK     |
| CR-IGR-0029P   | -                        | PD            | 0     | 1   | 0    | 1    | 0    | AK      |
| CR-IGR-0032P   | -                        | PD            | 0     | 1   | 0    | 1    | 0    | AK      |
| CR-IGR-0034P   | -                        | PD            | 0     | 0   | 1    | 0    | 1    | PB      |
| CR-IGR-0038C   | ++                       | SD            | 0     | 0   | 1    | 1    | 0    | PK      |

|              |     |       |   |   |   |   |   |     |
|--------------|-----|-------|---|---|---|---|---|-----|
| CR-IGR-0043P | -   | PD    | 0 | 1 | 0 | 1 | 0 | AK  |
| CR-IGR-0047P | +++ | CR/PR | 0 | 0 | 1 | 0 | 0 | P   |
| CR-IGR-0048M | +   | PD    | 0 | 0 | 1 | 0 | 0 | P   |
| CR-IGR-0052M | +   | PD    | 0 | 0 | 1 | 0 | 0 | P   |
| CR-LRB-0003P | -   | PD    | 1 | 1 | 0 | 0 | 0 | A   |
| CR-LRB-0004P | -   | PD    | 1 | 1 | 0 | 0 | 1 | AB  |
| CR-LRB-0007P | -   | PD    | 0 | 1 | 1 | 0 | 0 | AP  |
| CR-LRB-0008M | +   | PD    | 0 | 0 | 0 | 1 | 0 | K   |
| CR-LRB-0009C | -   | PD    | 0 | 0 | 0 | 1 | 0 | K   |
| CR-LRB-0010P | -   | PD    | 0 | 1 | 1 | 1 | 0 | APK |
| CR-LRB-0011M | -   | PD    | 0 | 1 | 1 | 1 | 0 | APK |
| CR-LRB-0013P | -   | PD    | 0 | 1 | 1 | 1 | 0 | APK |
| CR-LRB-0014P | +++ | CR/PR | 0 | 1 | 1 | 1 | 0 | APK |
| CR-LRB-0017P | -   | PD    | 0 | 1 | 1 | 1 | 0 | APK |
| CR-LRB-0018P | -   | PD    | 1 | 0 | 1 | 0 | 1 | PB  |
| CR-LRB-0019C | +++ | CR/PR | 0 | 1 | 1 | 0 | 0 | AP  |
| CR-LRB-0022P | -   | PD    | 1 | 0 | 0 | 1 | 0 | K   |

**Supplementary Table S8. Bertotti et al. (2015) cetuximab-treated CRC PDX models having wild-type KRAS, NRAS, BRAF and PI3KCA (n=98) (10)---cetuximab response (CR/PR/SD/PD) and mutation status of APC, TP53, KRAS, NRAS, and BRAF.**

**Note:** The molecular parameters were adopted from “Supplementary Table 10” (10). 1 — mut; 0 — wt; A — APC truncating mutation; P — TP53 mutation; K — KRAS mutation; N — NRAS mutation; B — BRAF(V600E); PR---partial response; SD---stable disease; PD---progressed disease

| PDX CASE ID | RESPONSE TO CETUXIMAB | APC | TP53 | KRAS | NRAS | BRAF | A/P/K/N/B |
|-------------|-----------------------|-----|------|------|------|------|-----------|
| CRC0014     | SD                    | 1   | 1    | 0    | 0    | 0    | AP        |
| CRC0030     | SD                    | 1   | 1    | 0    | 0    | 0    | AP        |
| CRC0032     | SD                    | 1   | 1    | 0    | 0    | 0    | AP        |
| CRC0054     | SD                    | 1   | 1    | 0    | 0    | 0    | AP        |
| CRC0057     | SD                    | 1   | 1    | 0    | 0    | 0    | AP        |
| CRC0065     | SD                    | 1   | 1    | 0    | 0    | 0    | AP        |
| CRC0066     | SD                    | 1   | 1    | 0    | 0    | 0    | AP        |
| CRC0076     | PR                    | 1   | 1    | 0    | 0    | 0    | AP        |
| CRC0078     | SD                    | 1   | 1    | 0    | 0    | 0    | AP        |
| CRC0081     | SD                    | 1   | 1    | 0    | 0    | 0    | AP        |
| CRC0095     | SD                    | 1   | 1    | 0    | 0    | 0    | AP        |
| CRC0096     | PR                    | 1   | 1    | 0    | 0    | 0    | AP        |
| CRC0097     | SD                    | 1   | 1    | 0    | 0    | 0    | AP        |
| CRC0098     | PR                    | 1   | 1    | 0    | 0    | 0    | AP        |
| CRC0099     | SD                    | 1   | 1    | 0    | 0    | 0    | AP        |
| CRC0101     | SD                    | 1   | 1    | 0    | 0    | 0    | AP        |
| CRC0102     | PR                    | 1   | 1    | 0    | 0    | 0    | AP        |
| CRC0103     | SD                    | 1   | 1    | 0    | 0    | 0    | AP        |
| CRC0109     | SD                    | 1   | 1    | 0    | 0    | 0    | AP        |
| CRC0113     | PR                    | 1   | 1    | 0    | 0    | 0    | AP        |
| CRC0115     | SD                    | 1   | 1    | 0    | 0    | 0    | AP        |
| CRC0116     | PR                    | 1   | 1    | 0    | 0    | 0    | AP        |
| CRC0117     | SD                    | 1   | 1    | 0    | 0    | 0    | AP        |
| CRC0121     | SD                    | 1   | 1    | 0    | 0    | 0    | AP        |
| CRC0124     | PD                    | 1   | 1    | 0    | 0    | 0    | AP        |
| CRC0126     | PD                    | 1   | 1    | 0    | 0    | 0    | AP        |
| CRC0129     | SD                    | 1   | 1    | 0    | 0    | 0    | AP        |
| CRC0131     | SD                    | 1   | 1    | 0    | 0    | 0    | AP        |
| CRC0133     | SD                    | 1   | 1    | 0    | 0    | 0    | AP        |
| CRC0146     | SD                    | 1   | 1    | 0    | 0    | 0    | AP        |
| CRC0147     | SD                    | 1   | 1    | 0    | 0    | 0    | AP        |
| CRC0151     | PD                    | 1   | 1    | 0    | 0    | 0    | AP        |
| CRC0152     | PD                    | 1   | 1    | 0    | 0    | 0    | AP        |
| CRC0153     | SD                    | 1   | 1    | 0    | 0    | 0    | AP        |

|         |    |   |   |   |   |   |    |
|---------|----|---|---|---|---|---|----|
| CRC0159 | SD | 1 | 1 | 0 | 0 | 0 | AP |
| CRC0161 | PD | 1 | 1 | 0 | 0 | 0 | AP |
| CRC0166 | PD | 1 | 1 | 0 | 0 | 0 | AP |
| CRC0171 | SD | 1 | 1 | 0 | 0 | 0 | AP |
| CRC0176 | PD | 1 | 1 | 0 | 0 | 0 | AP |
| CRC0177 | PD | 1 | 1 | 0 | 0 | 0 | AP |
| CRC0179 | SD | 1 | 1 | 0 | 0 | 0 | AP |
| CRC0185 | PR | 1 | 1 | 0 | 0 | 0 | AP |
| CRC0186 | PD | 1 | 1 | 0 | 0 | 0 | AP |
| CRC0188 | SD | 1 | 1 | 0 | 0 | 0 | AP |
| CRC0190 | SD | 1 | 1 | 0 | 0 | 0 | AP |
| CRC0196 | PD | 1 | 1 | 0 | 0 | 0 | AP |
| CRC0197 | PD | 1 | 1 | 0 | 0 | 0 | AP |
| CRC0202 | SD | 1 | 1 | 0 | 0 | 0 | AP |
| CRC0204 | SD | 1 | 1 | 0 | 0 | 0 | AP |
| CRC0219 | PR | 1 | 1 | 0 | 0 | 0 | AP |
| CRC0243 | SD | 1 | 1 | 0 | 0 | 0 | AP |
| CRC0246 | PR | 1 | 1 | 0 | 0 | 0 | AP |
| CRC0252 | PR | 1 | 1 | 0 | 0 | 0 | AP |
| CRC0254 | SD | 1 | 1 | 0 | 0 | 0 | AP |
| CRC0262 | PR | 1 | 1 | 0 | 0 | 0 | AP |
| CRC0264 | SD | 1 | 1 | 0 | 0 | 0 | AP |
| CRC0285 | SD | 1 | 1 | 0 | 0 | 0 | AP |
| CRC0297 | PR | 1 | 1 | 0 | 0 | 0 | AP |
| CRC0306 | SD | 1 | 1 | 0 | 0 | 0 | AP |
| CRC0321 | SD | 1 | 1 | 0 | 0 | 0 | AP |
| CRC0327 | PR | 1 | 1 | 0 | 0 | 0 | AP |
| CRC0344 | SD | 1 | 1 | 0 | 0 | 0 | AP |
| CRC0358 | PD | 1 | 1 | 0 | 0 | 0 | AP |
| CRC0362 | SD | 1 | 1 | 0 | 0 | 0 | AP |
| CRC0378 | PR | 1 | 1 | 0 | 0 | 0 | AP |
| CRC0394 | SD | 1 | 1 | 0 | 0 | 0 | AP |
| CRC0399 | PR | 1 | 1 | 0 | 0 | 0 | AP |
| CRC0400 | SD | 1 | 1 | 0 | 0 | 0 | AP |
| CRC0403 | SD | 1 | 1 | 0 | 0 | 0 | AP |
| CRC0404 | PR | 1 | 1 | 0 | 0 | 0 | AP |
| CRC0419 | PR | 1 | 1 | 0 | 0 | 0 | AP |
| CRC0440 | PR | 1 | 1 | 0 | 0 | 0 | AP |
| CRC0456 | PR | 1 | 1 | 0 | 0 | 0 | AP |
| CRC0025 | PD | 1 | 0 | 0 | 0 | 0 | A  |
| CRC0029 | SD | 0 | 1 | 0 | 0 | 0 | P  |
| CRC0068 | PD | 1 | 0 | 0 | 0 | 0 | A  |
| CRC0080 | PD | 0 | 1 | 0 | 0 | 0 | P  |
| CRC0137 | SD | 0 | 1 | 0 | 0 | 0 | P  |
| CRC0199 | PD | 0 | 1 | 0 | 0 | 0 | P  |



|         |    |   |   |   |   |   |    |
|---------|----|---|---|---|---|---|----|
| CRC0237 | SD | 0 | 1 | 0 | 0 | 0 | P  |
| CRC0239 | PD | 0 | 1 | 0 | 0 | 0 | P  |
| CRC0312 | SD | 1 | 0 | 0 | 0 | 0 | A  |
| CRC0343 | PD | 1 | 0 | 0 | 0 | 0 | A  |
| CRC0396 | PR | 1 | 0 | 0 | 0 | 0 | A  |
| CRC0441 | SD | 1 | 0 | 0 | 0 | 0 | A  |
| CRC0058 | PD | 0 | 0 | 0 | 0 | 0 | wt |
| CRC0069 | PR | 0 | 0 | 0 | 0 | 0 | wt |
| CRC0112 | PD | 0 | 0 | 0 | 0 | 0 | wt |
| CRC0125 | PD | 0 | 0 | 0 | 0 | 0 | wt |
| CRC0157 | PR | 0 | 0 | 0 | 0 | 0 | wt |
| CRC0257 | SD | 0 | 0 | 0 | 0 | 0 | wt |
| CRC0276 | PD | 0 | 0 | 0 | 0 | 0 | wt |
| CRC0307 | PD | 0 | 0 | 0 | 0 | 0 | wt |
| CRC0322 | PR | 0 | 0 | 0 | 0 | 0 | wt |
| CRC0371 | PD | 0 | 0 | 0 | 0 | 0 | wt |
| CRC0416 | PD | 0 | 0 | 0 | 0 | 0 | wt |
| CRC0435 | SD | 0 | 0 | 0 | 0 | 0 | wt |
| CRC0442 | SD | 0 | 0 | 0 | 0 | 0 | wt |

## Supplementary Table S9. Gene (and gene\_id) lists of four signature scores

**Note:** 1. 203-gene cetuximab sensitivity score (94 up genes and 109 down genes); 2. 64-gene Wnt pathway score(5, 14); 3. 24-gene APC mutations-specific Wnt pathway score; 4. 18-gene RAS pathway score(15)

| Cetuximab sensitivity score (94 up genes) | Cetuximab sensitivity score (109 down genes) | 64-gene Wnt pathway score | 24-gene Wnt pathway score | 18-gene RAS pathway score |
|-------------------------------------------|----------------------------------------------|---------------------------|---------------------------|---------------------------|
| AKAP1 8165                                | AGR3 155465                                  | ABCB1 5243                | ABCB1 5243                | KANK1 23189               |
| ANO9 338440                               | ALPK2 115701                                 | ADAM10 102                | ASCL2 430                 | DUSP4 1846                |
| ARFGF2 10564                              | ANKRD1 27063                                 | ARMCX1 51309              | AXIN2 8313                | DUSP6 1848                |
| ARHGAP8 23779                             | ASXL1 171023                                 | ASCL2 430                 | BMP4 652                  | ELF1 1997                 |
| ATP9A 10079                               | ATP8A1 10396                                 | AXIN2 8313                | CDX1 1044                 | ETV4 2118                 |
| BCL11B 64919                              | ATXN7 6314                                   | BAMBI 25805               | CLDN1 9076                | ETV5 2119                 |
| C13orf18 80183                            | B3GNT6 192134                                | BCL2L2 599                | DKK4 27121                | FXYD5 53827               |
| C1orf96 126731                            | BDH1 622                                     | BIRC5 332                 | ENAH 55740                | LGALS3 3958               |
| C20orf112 140688                          | C18orf21 83608                               | BMI1 648                  | ENC1 8507                 | LZTS1 11178               |
| CD24 100133941                            | C4orf19 55286                                | BMP4 652                  | EPHB2 2048                | MAP2K3 5606               |
| CDH1 999                                  | CA8 767                                      | CCND1 595                 | EPHB3 2049                | PHLDA1 22822              |
| CEACAM5 1048                              | CACNA1C 775                                  | CD44 960                  | FGF18 8817                | PROS1 5627                |
| CEACAM6 4680                              | CAPN5 726                                    | CDKN2A 1029               | HES1 3280                 | S100A6 6277               |
| CFTR 1080                                 | CAPN9 10753                                  | CDX1 1044                 | HNF1A 6927                | SERPINB1 1992             |
| CLDN4 1364                                | CASP5 838                                    | CLDN1 9076                | JUN 3725                  | SLCO4A1 28231             |
| COPG 22820                                | CCDC80 151887                                | DKK1 22943                | LGR5 8549                 | SPRY2 10253               |
| CPNE1 8904                                | CD109 135228                                 | DKK4 27121                | MET 4233                  | TRIB2 28951               |
| DERL1 79139                               | CDK2 1017                                    | DNMT1 1786                | MYB 4602                  | ZFP106 64397              |
| DNAJC15 29103                             | CFL2 1073                                    | EDN1 1906                 | MYC 4609                  |                           |
| DNTTIP1 116092                            | CLCA1 1179                                   | ENAH 55740                | SOX9 6662                 |                           |
| DSP 1832                                  | CLDN1 9076                                   | ENC1 8507                 | SP5 389058                |                           |
| DUSP6 1848                                | CMTM4 146223                                 | EPHB2 2048                | SUZ12 23512               |                           |
| EIF2C2 27161                              | CNOT7 29883                                  | EPHB3 2049                | VEGFA 7422                |                           |
| EIF6 3692                                 | CRIP1 1396                                   | FGF18 8817                | YAP1 10413                |                           |
| EPPK1 83481                               | CSNK1G1 53944                                | FGFBP1 9982               |                           |                           |
| EPSTI1 94240                              | CTSE 1510                                    | FOSL1 8061                |                           |                           |
| EREG 2069                                 | CYB5D1 124637                                | FSCN1 6624                |                           |                           |
| FAM3B 54097                               | DICER1 23405                                 | GAST 2520                 |                           |                           |
| FAM49B 51571                              | DMKN 93099                                   | HES1 3280                 |                           |                           |
| FAM84A 151354                             | DNAJB4 11080                                 | HNF1A 6927                |                           |                           |
| FARP1 10160                               | DOCK5 80005                                  | ID2 3398                  |                           |                           |
| FLRT2 23768                               | DSC2 1824                                    | JAG1 182                  |                           |                           |
| FOXO3 2309                                | DUSP4 1846                                   | JUN 3725                  |                           |                           |
| GALNT6 11226                              | ERAP2 64167                                  | L1CAM 3897                |                           |                           |
| GRHL2 79977                               | ERP27 121506                                 | LAMC2 3918                |                           |                           |
| GRM8 2918                                 | FAM18B 51030                                 | LEF1 51176                |                           |                           |
| HTATSF1 27336                             | FBXO21 23014                                 | LGR5 8549                 |                           |                           |
| IL22RA1 58985                             | FBXO32 114907                                | MET 4233                  |                           |                           |
| IRS2 8660                                 | FGFR2 2263                                   | MMP14 4323                |                           |                           |

|                |                 |              |  |  |
|----------------|-----------------|--------------|--|--|
| ITPR3 3710     | FHL1 2273       | MMP7 4316    |  |  |
| ITSN1 6453     | FNTB 2342       | MYB 4602     |  |  |
| KIF3B 9371     | GLIPR1 11010    | MYC 4609     |  |  |
| KLF6 1316      | GPA33 10223     | MYCBP2 23077 |  |  |
| KRT20 54474    | HMGA2 8091      | NEDD9 4739   |  |  |
| LARP4B 23185   | HSPA2 3306      | NOS2 4843    |  |  |
| LIF 3976       | IGF1R 3480      | NOTCH2 4853  |  |  |
| MAP1LC3B 81631 | INSR 3643       | NRCAM 4897   |  |  |
| MED13 9969     | IRS1 3667       | PLAU 5328    |  |  |
| MUC12 10071    | ITLN1 55600     | PLAUR 5329   |  |  |
| MUC20 200958   | JAM3 83700      | PPARD 5467   |  |  |
| NDRG1 10397    | KLF9 687        | PTGS2 5743   |  |  |
| NUCB2 4925     | KLK10 5655      | S100A4 6275  |  |  |
| PABPC1L 80336  | KPNA1 3836      | S100A6 6277  |  |  |
| PARD6B 84612   | LDLR 3949       | SFRS3 6428   |  |  |
| PDS5B 23047    | LGR5 8549       | SGK1 6446    |  |  |
| PEA15 8682     | LHFP 10186      | SMC3 9126    |  |  |
| PHF5A 84844    | LRRC16A 55604   | SOX9 6662    |  |  |
| PIGU 128869    | MBP 4155        | SP5 389058   |  |  |
| PLAGL2 5326    | MCCC2 64087     | SUZ12 23512  |  |  |
| PLCG1 5335     | MLPH 79083      | TCF4 6925    |  |  |
| PLS1 5357      | MUC2 4583       | TIAM1 7074   |  |  |
| PPP1R14C 81706 | MYO5A 4644      | TNC 3371     |  |  |
| PRR15 222171   | NOB1 28987      | VEGFA 7422   |  |  |
| PRSS8 5652     | NPNT 255743     | YAP1 10413   |  |  |
| RALGAPB 57148  | NRG1 3084       |              |  |  |
| R3HDML 140902  | NRN1 51299      |              |  |  |
| RBM39 9584     | NT5E 4907       |              |  |  |
| RNF113A 7737   | OR2A4 79541     |              |  |  |
| RNF43 54894    | PAPPA 5069      |              |  |  |
| SAMD12 401474  | PARP1 142       |              |  |  |
| SCD 6319       | PPM1A 5494      |              |  |  |
| SCRN1 9805     | PPP1R9A 55607   |              |  |  |
| SDC4 6385      | PROM2 150696    |              |  |  |
| SERINC3 10955  | PRUNE2 158471   |              |  |  |
| SLC38A1 81539  | PSIP1 11168     |              |  |  |
| SLC45A4 57210  | QKI 9444        |              |  |  |
| SLC5A6 8884    | RAB27B 5874     |              |  |  |
| SLC7A5 8140    | RASGEF1B 153020 |              |  |  |
| SPINT2 10653   | REG4 83998      |              |  |  |
| SRPX2 27286    | RFC3 5983       |              |  |  |
| STK4 6789      | RNF125 54941    |              |  |  |
| STX16 8675     | RNF180 285671   |              |  |  |
| TMPRSS4 56649  | RTN3 10313      |              |  |  |
| TNNC2 7125     | RTN4 57142      |              |  |  |
| TOMM34 10953   | SCIN 85477      |              |  |  |

|               |                |  |  |  |
|---------------|----------------|--|--|--|
| TP53RK 112858 | SERPINB5 5268  |  |  |  |
| TRIM13 10206  | SFXN1 94081    |  |  |  |
| VAV3 10451    | SGOL2 151246   |  |  |  |
| XIAP 331      | SH3RF2 153769  |  |  |  |
| YWHAB 7529    | SLC25A37 51312 |  |  |  |
| ZBTB38 253461 | SLC2A10 81031  |  |  |  |
| ZMYND8 23613  | SLC35A1 10559  |  |  |  |
| ZNF514 84874  | SLIT2 9353     |  |  |  |
| ZNF532 55205  | SMCHD1 23347   |  |  |  |
|               | SNAP25 6616    |  |  |  |
|               | SORBS2 8470    |  |  |  |
|               | SPATA18 132671 |  |  |  |
|               | SPINK4 27290   |  |  |  |
|               | TC2N 123036    |  |  |  |
|               | TCN1 6947      |  |  |  |
|               | TMC5 79838     |  |  |  |
|               | TNFRSF10B 8795 |  |  |  |
|               | TNFRSF11A 8792 |  |  |  |
|               | TOX 9760       |  |  |  |
|               | TTC37 9652     |  |  |  |
|               | TTC9 23508     |  |  |  |
|               | UBE2E2 7325    |  |  |  |
|               | USP14 9097     |  |  |  |
|               | ZBTB7C 201501  |  |  |  |

**Supplementary Table S10. Validation of the cetuximab sensitivity (CTX-S) score by Barnard's exact test Cochran-Mantel-Haenszel test in two independent test sets.** The significant *P* values are highlighted by yellow color.

**A. Barnard's Exact Test on the frequencies of objective response by higher vs. lower in 41 Merck NP004 cetuximab treated CRCs.** Note: OR---objective response; No OR---no objective response. Of 44 CRCs, one sample with PFS of 1 day and two samples with CTX-S scores near 0.00 as shown in Fig. 1A were excluded from analysis.

| Table of position by Status                         |                                 |                                  |       |
|-----------------------------------------------------|---------------------------------|----------------------------------|-------|
| position                                            | Adjusted CTX-S scores           |                                  |       |
| Frequency<br>Expected<br>Cell Chi-Square<br>Col Pct | ≥0                              | <0                               | Total |
| <b>OR</b>                                           | 12<br>8.1951<br>1.7666<br>42.86 | 0<br>3.8049<br>3.8049<br>0.00    | 12    |
| <b>No OR</b>                                        | 16<br>19.805<br>0.731<br>57.14  | 13<br>9.1951<br>1.5744<br>100.00 | 29    |
| <b>Total</b>                                        | 28                              | 13                               | 41    |

| Barnard's Exact Test<br>Proportion (Risk) Difference |        |
|------------------------------------------------------|--------|
| H0: P1 - P2 = 0                                      |        |
| <b>Proportion Difference</b>                         | 0.4483 |
| <b>ASE (H0)</b>                                      | 0.1597 |
| <b>Z</b>                                             | 2.8066 |
| <b>One-sided Pr &lt;= Z</b>                          | 0.0035 |
| <b>Two-sided Pr &gt;=  Z </b>                        | 0.0048 |

**B,C. Cochran-Mantel-Haenszel test on response by CTX-S scores by quartiles (4th, highest; 1st, lowest) in 80 Khambata-Ford et al. cetuximab treated CRCs.**

Note: PFS---progression free survival; CR---complete response; PR---partial response; SD---stable disease; PD---progressed disease; UTD---undetermined.

**B. CR/PR vs. SD vs. PD vs. UTD (n=80)**

| Table of Response by CTX_Sensitivity_Score          |                               |                                |                               |                                |       |
|-----------------------------------------------------|-------------------------------|--------------------------------|-------------------------------|--------------------------------|-------|
| Response                                            | Quartile Scores               |                                |                               |                                |       |
| Frequency<br>Expected<br>Cell Chi-Square<br>Col Pct | 4th                           | 3rd                            | 2nd                           | 1st                            | Total |
| <b>CR/PR</b>                                        | 3<br>1.5<br>1.5<br>15.00      | 2<br>1.5<br>0.1667<br>10.00    | 1<br>1.5<br>0.1667<br>5.00    | 0<br>1.5<br>1.5<br>0.00        | 6     |
| <b>SD</b>                                           | 10<br>4.75<br>5.8026<br>50.00 | 3<br>4.75<br>0.6447<br>15.00   | 4<br>4.75<br>0.1184<br>20.00  | 2<br>4.75<br>1.5921<br>10.00   | 19    |
| <b>PD</b>                                           | 7<br>10.75<br>1.3081<br>35.00 | 13<br>10.75<br>0.4709<br>65.00 | 8<br>10.75<br>0.7035<br>40.00 | 15<br>10.75<br>1.6802<br>75.00 | 43    |
| <b>UTD</b>                                          | 0<br>3<br>3<br>0.00           | 2<br>3<br>0.3333<br>10.00      | 7<br>3<br>5.3333<br>35.00     | 3<br>3<br>0<br>15.00           | 12    |
| <b>Total</b>                                        | 20                            | 20                             | 20                            | 20                             | 80    |

| Statistic | Alternative Hypothesis | DF | Value   | Prob   |
|-----------|------------------------|----|---------|--------|
| 1         | Nonzero Correlation    | 1  | 12.7096 | 0.0004 |

C. CR/PR vs. SD vs. PD (n=68; 12 UTDs of 80 were treated as missing points)

| Table of Response by CTX_Sensitivity_Score          |                                |                                 |                                |                                |       |
|-----------------------------------------------------|--------------------------------|---------------------------------|--------------------------------|--------------------------------|-------|
| Response                                            | Quartile Scores                |                                 |                                |                                |       |
| Frequency<br>Expected<br>Cell Chi-Square<br>Col Pct | 4th                            | 3rd                             | 2nd                            | 1st                            | Total |
| <b>CR/PR</b>                                        | 3<br>1.7647<br>0.8647<br>15.00 | 2<br>1.5882<br>0.1068<br>11.11  | 1<br>1.1471<br>0.0189<br>7.69  | 0<br>1.5<br>1.5<br>0.00        | 6     |
| <b>SD</b>                                           | 10<br>5.5882<br>3.483<br>50.00 | 3<br>5.0294<br>0.8189<br>16.67  | 4<br>3.6324<br>0.0372<br>30.77 | 2<br>4.75<br>1.5921<br>11.76   | 19    |
| <b>PD</b>                                           | 7<br>12.647<br>2.5215<br>35.00 | 13<br>11.382<br>0.2299<br>72.22 | 8<br>8.2206<br>0.0059<br>61.54 | 15<br>10.75<br>1.6802<br>88.24 | 43    |
| <b>Total</b>                                        | 20                             | 18                              | 13                             | 17                             | 68    |

| Statistic | Alternative Hypothesis | DF | Value  | Prob   |
|-----------|------------------------|----|--------|--------|
| 1         | Nonzero Correlation    | 1  | 8.6178 | 0.0033 |

## Supplementary Table S11. Mutation ranking of Moffitt 468 CRCs by the cetuximab sensitivity score

**Note:** APC — APC truncating mutation; BRAF — BRAF(V600E). The mutated genes were listed according to adjusted p values that were calculated using the Hochberg and Benjamini method (11).

| gene     | p_value  | N_mutation | SumOfScores  | PCT      | Adjusted_p |
|----------|----------|------------|--------------|----------|------------|
| TP53     | 1.89E-24 | 277        | 107.3826181  | 0.59188  | 5.8E-22    |
| msi_high | 6.74E-24 | 61         | -72.66628313 | 0.130342 | 2.06E-21   |
| TGFBR2   | 1.93E-23 | 62         | -72.41573178 | 0.132479 | 5.9E-21    |
| APC      | 7.96E-21 | 312        | 94.47392504  | 0.666667 | 2.44E-18   |
| BRAF     | 5.67E-17 | 53         | -56.80325958 | 0.113248 | 1.74E-14   |
| CELSR1   | 1.56E-06 | 72         | -37.10419168 | 0.153846 | 0.000478   |
| HDLBP    | 4.03E-06 | 23         | -21.33576461 | 0.049145 | 0.001234   |
| ITGB4    | 6.05E-06 | 45         | -28.55912145 | 0.096154 | 0.001852   |
| PML      | 6.3E-06  | 22         | -20.46649294 | 0.047009 | 0.001926   |
| HSPA2    | 1.23E-05 | 14         | -15.95018497 | 0.029915 | 0.003749   |
| MLL2     | 2.29E-05 | 84         | -34.79719732 | 0.179487 | 0.006995   |
| MICAL1   | 2.36E-05 | 26         | -20.73549203 | 0.055556 | 0.007217   |
| PTPRS    | 2.58E-05 | 47         | -27.08012877 | 0.100427 | 0.007885   |
| MAP3K9   | 2.72E-05 | 21         | -18.59906752 | 0.044872 | 0.008312   |
| ITPR1    | 4.23E-05 | 34         | -22.75596786 | 0.07265  | 0.012936   |
| HDAC4    | 5.35E-05 | 20         | -17.49416233 | 0.042735 | 0.016377   |
| DOT1L    | 5.87E-05 | 24         | -18.97595021 | 0.051282 | 0.017956   |
| RPS6KA2  | 5.95E-05 | 12         | -13.58684999 | 0.025641 | 0.018212   |
| CHD5     | 5.96E-05 | 23         | -18.58022375 | 0.049145 | 0.018239   |
| MLL4     | 7.03E-05 | 54         | -27.19220738 | 0.115385 | 0.021519   |
| THBS1    | 7.04E-05 | 19         | -16.79710874 | 0.040598 | 0.02153    |
| CASP8    | 7.34E-05 | 20         | -17.17105107 | 0.042735 | 0.022451   |
| SRC      | 8.31E-05 | 6          | -9.478676218 | 0.012821 | 0.025442   |
| ACVR1B   | 9.45E-05 | 13         | -13.73760507 | 0.027778 | 0.028916   |
| ZEB2     | 0.000104 | 18         | -15.98341459 | 0.038462 | 0.031723   |
| ITPR3    | 0.00011  | 42         | -23.66389646 | 0.089744 | 0.033725   |
| RPS6KA4  | 0.00012  | 12         | -13.01361784 | 0.025641 | 0.036837   |
| MCM3AP   | 0.000125 | 22         | -17.38059095 | 0.047009 | 0.038381   |
| BCORL1   | 0.00013  | 24         | -18.07425123 | 0.051282 | 0.039672   |
| MYH9     | 0.00013  | 38         | -22.37377056 | 0.081197 | 0.039885   |
| MACF1    | 0.000145 | 82         | -30.92823514 | 0.175214 | 0.044307   |
| DLC1     | 0.000157 | 42         | -23.13115505 | 0.089744 | 0.048013   |
| SPTAN1   | 0.000168 | 28         | -19.10820483 | 0.059829 | 0.051391   |
| LATS1    | 0.000176 | 18         | -15.44291799 | 0.038462 | 0.053989   |
| SMAD3    | 0.000188 | 22         | -16.92687242 | 0.047009 | 0.057407   |
| ATP8B1   | 0.000202 | 17         | -14.88971063 | 0.036325 | 0.061709   |
| NRP2     | 0.000222 | 26         | -18.11200973 | 0.055556 | 0.067818   |
| ERBB3    | 0.00023  | 36         | -21.01395614 | 0.076923 | 0.07048    |
| LRP1     | 0.000235 | 71         | -28.24873068 | 0.151709 | 0.071996   |
| CIC      | 0.000247 | 24         | -17.30811945 | 0.051282 | 0.075713   |

|          |          |    |              |          |          |
|----------|----------|----|--------------|----------|----------|
| BRCA1    | 0.000265 | 35 | -20.54393615 | 0.074786 | 0.080976 |
| CTNN     | 0.000297 | 65 | -26.78649751 | 0.138889 | 0.090999 |
| IRS1     | 0.000319 | 29 | -18.58202258 | 0.061966 | 0.09747  |
| HOXA3    | 0.000345 | 8  | -9.932602598 | 0.017094 | 0.105584 |
| CTNNA1   | 0.000429 | 23 | -16.29968773 | 0.049145 | 0.131237 |
| MEX3B    | 0.000431 | 17 | -14.1025466  | 0.036325 | 0.131843 |
| PLCB1    | 0.00044  | 20 | -15.22190496 | 0.042735 | 0.134566 |
| TRRAP    | 0.000465 | 45 | -22.093729   | 0.096154 | 0.14222  |
| SMAD2    | 0.000535 | 19 | -14.63090421 | 0.040598 | 0.163807 |
| PIAS1    | 0.000556 | 12 | -11.68399706 | 0.025641 | 0.169984 |
| AFF4     | 0.000564 | 15 | -13.00445999 | 0.032051 | 0.172609 |
| NLE1     | 0.000571 | 6  | -8.297610412 | 0.012821 | 0.174861 |
| GRM1     | 0.000622 | 29 | -17.66463105 | 0.061966 | 0.190198 |
| SMARC    | 0.000664 | 33 | -18.65910794 | 0.070513 | 0.203147 |
| CUBN     | 0.000665 | 70 | -25.99074297 | 0.149573 | 0.203504 |
| BTRC     | 0.000679 | 5  | -7.479779807 | 0.010684 | 0.207714 |
| KDM4C    | 0.000737 | 18 | -13.89843497 | 0.038462 | 0.225495 |
| RALB     | 0.000775 | 5  | -7.39945985  | 0.010684 | 0.237202 |
| CHEK1    | 0.000776 | 7  | -8.735835344 | 0.014957 | 0.237332 |
| GLI3     | 0.000787 | 47 | -21.60604435 | 0.100427 | 0.24081  |
| PRKDC    | 0.000787 | 60 | -24.03086252 | 0.128205 | 0.240956 |
| WNK1     | 0.000788 | 27 | -16.75942888 | 0.057692 | 0.240994 |
| NUP98    | 0.000798 | 26 | -16.44692219 | 0.055556 | 0.244186 |
| LRRC7    | 0.000799 | 24 | -15.83500236 | 0.051282 | 0.244635 |
| HERC1    | 0.000817 | 43 | -20.69977342 | 0.09188  | 0.250036 |
| GRM6     | 0.000833 | 31 | -17.79354533 | 0.066239 | 0.254913 |
| ZNF384   | 0.000849 | 15 | -12.58153153 | 0.032051 | 0.259915 |
| SMARCA4  | 0.000872 | 32 | -17.98964199 | 0.068376 | 0.2667   |
| BCR      | 0.000952 | 23 | -15.29341411 | 0.049145 | 0.291424 |
| ADCY9    | 0.000975 | 33 | -18.07616087 | 0.070513 | 0.298261 |
| RPTOR    | 0.001029 | 13 | -11.54924246 | 0.027778 | 0.315003 |
| NOS1     | 0.001034 | 31 | -17.4721906  | 0.066239 | 0.316274 |
| TNFAIP3  | 0.001036 | 18 | -13.50752342 | 0.038462 | 0.317059 |
| TRAF3    | 0.001038 | 9  | -9.644843856 | 0.019231 | 0.317617 |
| AR       | 0.001088 | 33 | -17.90662101 | 0.070513 | 0.332841 |
| TRIM24   | 0.001088 | 19 | -13.80398076 | 0.040598 | 0.332909 |
| CDH1     | 0.001158 | 20 | -14.06975086 | 0.042735 | 0.35445  |
| MAPK8IP3 | 0.001172 | 20 | -14.05538827 | 0.042735 | 0.358605 |
| FOXP4    | 0.00118  | 9  | -9.538242376 | 0.019231 | 0.360947 |
| JAG2     | 0.0012   | 10 | -10.02783927 | 0.021368 | 0.367297 |
| CTNNB1   | 0.001209 | 20 | -14.01722715 | 0.042735 | 0.369864 |
| JUN      | 0.001216 | 6  | -7.79253254  | 0.012821 | 0.372054 |
| LPHN1    | 0.001224 | 32 | -17.47219986 | 0.068376 | 0.374513 |
| ABCC4    | 0.001249 | 18 | -13.28855827 | 0.038462 | 0.38233  |
| PTK2B    | 0.001279 | 19 | -13.60916401 | 0.040598 | 0.391394 |
| KDM5A    | 0.001328 | 25 | -15.4537233  | 0.053419 | 0.406521 |



|          |          |     |              |          |          |
|----------|----------|-----|--------------|----------|----------|
| MLL3     | 0.001393 | 63  | -23.35588319 | 0.134615 | 0.426382 |
| KIAA0182 | 0.001418 | 23  | -14.7694247  | 0.049145 | 0.433818 |
| TP73     | 0.001469 | 9   | -9.353125    | 0.019231 | 0.449386 |
| EVC2     | 0.00149  | 32  | -17.16637834 | 0.068376 | 0.455886 |
| TTN      | 0.001558 | 321 | -31.44041996 | 0.685897 | 0.476774 |
| DGKA     | 0.001573 | 9   | -9.294327875 | 0.019231 | 0.481408 |
| TEK      | 0.00161  | 19  | -13.32788214 | 0.040598 | 0.492693 |
| USP34    | 0.001663 | 41  | -19.0359195  | 0.087607 | 0.508761 |
| BARD1    | 0.001671 | 11  | -10.19581075 | 0.023504 | 0.511293 |
| PLCG1    | 0.001721 | 20  | -13.5746738  | 0.042735 | 0.526547 |
| TNPO3    | 0.001748 | 8   | -8.686971087 | 0.017094 | 0.534773 |
| EPHA8    | 0.001751 | 23  | -14.4843565  | 0.049145 | 0.535944 |
| ZNF831   | 0.001805 | 43  | -19.29965941 | 0.09188  | 0.552373 |
| GRM3     | 0.00181  | 23  | -14.43959299 | 0.049145 | 0.553856 |
| CBX4     | 0.001839 | 28  | -15.81805517 | 0.059829 | 0.562874 |
| STK11    | 0.001848 | 10  | -9.640496963 | 0.021368 | 0.565357 |
| TP63     | 0.001865 | 12  | -10.52821617 | 0.025641 | 0.570665 |
| RAD50    | 0.001895 | 16  | -12.08504808 | 0.034188 | 0.579898 |
| MLH3     | 0.0019   | 26  | -15.2305157  | 0.055556 | 0.581335 |
| ERCC2    | 0.001909 | 18  | -12.78107442 | 0.038462 | 0.584038 |
| PPM1H    | 0.001909 | 6   | -7.476671211 | 0.012821 | 0.584225 |
| PTPRU    | 0.001947 | 28  | -15.73312846 | 0.059829 | 0.595633 |
| DBF4B    | 0.001976 | 8   | -8.586331443 | 0.017094 | 0.604665 |
| BTK      | 0.002158 | 10  | -9.497703357 | 0.021368 | 0.660346 |
| TNPO1    | 0.002197 | 8   | -8.498666343 | 0.017094 | 0.672279 |
| RUNX1    | 0.002219 | 9   | -8.995597251 | 0.019231 | 0.679028 |
| WNT1     | 0.00225  | 9   | -8.983483243 | 0.019231 | 0.688426 |
| IGF1R    | 0.002293 | 23  | -14.11381536 | 0.049145 | 0.701717 |
| ERN1     | 0.002315 | 17  | -12.20399931 | 0.036325 | 0.708486 |
| TLR7     | 0.002391 | 11  | -9.850366248 | 0.023504 | 0.731797 |
| NEDD4L   | 0.002514 | 15  | -11.39517538 | 0.032051 | 0.769425 |
| MLL      | 0.002579 | 35  | -16.97444801 | 0.074786 | 0.789232 |
| DUSP4    | 0.002644 | 9   | -8.840253732 | 0.019231 | 0.808936 |
| ATM      | 0.002652 | 65  | -22.2541142  | 0.138889 | 0.811444 |
| ULK3     | 0.002675 | 8   | -8.333724197 | 0.017094 | 0.818595 |
| SLC2A4   | 0.002782 | 12  | -10.12195505 | 0.025641 | 0.851167 |
| NIPBL    | 0.002863 | 37  | -17.22828225 | 0.07906  | 0.876201 |
| G3BP2    | 0.002915 | 5   | -6.551991515 | 0.010684 | 0.89213  |
| NF1      | 0.002931 | 29  | -15.35624595 | 0.061966 | 0.897007 |
| IDH1     | 0.002943 | 8   | -8.252843224 | 0.017094 | 0.9005   |
| EPHA5    | 0.003051 | 33  | -16.23918914 | 0.070513 | 0.933465 |
| TNKS     | 0.003132 | 23  | -13.67447622 | 0.049145 | 0.958469 |
| DNMT3A   | 0.003175 | 9   | -8.675139024 | 0.019231 | 0.971599 |
| FASN     | 0.00323  | 33  | -16.14243577 | 0.070513 | 0.988409 |
| PARP14   | 0.003244 | 32  | -15.90681476 | 0.068376 | 0.992803 |
| FOSL1    | 0.003291 | 5   | -6.469866732 | 0.010684 | 0.9991   |

|          |          |    |              |          |        |
|----------|----------|----|--------------|----------|--------|
| PARP1    | 0.003295 | 18 | -12.10051746 | 0.038462 | 0.9991 |
| ALPK2    | 0.003332 | 36 | -16.7468727  | 0.076923 | 0.9991 |
| FZD10    | 0.003424 | 17 | -11.72489283 | 0.036325 | 0.9991 |
| USP9X    | 0.003448 | 18 | -12.04252055 | 0.038462 | 0.9991 |
| USP24    | 0.00351  | 12 | -9.879252713 | 0.025641 | 0.9991 |
| TSC1     | 0.003528 | 23 | -13.50385018 | 0.049145 | 0.9991 |
| PTPN21   | 0.00354  | 28 | -14.81015892 | 0.059829 | 0.9991 |
| PCDHB2   | 0.003694 | 25 | -13.97774021 | 0.053419 | 0.9991 |
| ITGAL    | 0.003932 | 18 | -11.87290716 | 0.038462 | 0.9991 |
| BMPR2    | 0.003947 | 20 | -12.48228311 | 0.042735 | 0.9991 |
| ERRF1    | 0.00395  | 5  | -6.344227464 | 0.010684 | 0.9991 |
| ARNT     | 0.003962 | 9  | -8.472039627 | 0.019231 | 0.9991 |
| MECOM    | 0.003976 | 16 | -11.20511566 | 0.034188 | 0.9991 |
| SLC6A18  | 0.00399  | 18 | -11.85397377 | 0.038462 | 0.9991 |
| RAD21    | 0.004105 | 7  | -7.458805669 | 0.014957 | 0.9991 |
| MAPK9    | 0.00422  | 7  | -7.436124774 | 0.014957 | 0.9991 |
| DNAH8    | 0.00429  | 76 | -22.55284571 | 0.162393 | 0.9991 |
| MINK1    | 0.004359 | 17 | -11.42074787 | 0.036325 | 0.9991 |
| EXT1     | 0.004369 | 13 | -10.02875743 | 0.027778 | 0.9991 |
| USP28    | 0.004382 | 24 | -13.45611422 | 0.051282 | 0.9991 |
| WHSC1    | 0.004399 | 21 | -12.62406639 | 0.044872 | 0.9991 |
| USP8     | 0.004403 | 12 | -9.637515882 | 0.025641 | 0.9991 |
| DNMT1    | 0.00444  | 17 | -11.39719193 | 0.036325 | 0.9991 |
| CNTRL    | 0.004473 | 43 | -17.58121988 | 0.09188  | 0.9991 |
| TLE4     | 0.004498 | 19 | -12.00488539 | 0.040598 | 0.9991 |
| NTRK3    | 0.004527 | 21 | -12.58351468 | 0.044872 | 0.9991 |
| FLNB     | 0.004536 | 50 | -18.77208997 | 0.106838 | 0.9991 |
| XRCC6    | 0.004573 | 7  | -7.369570393 | 0.014957 | 0.9991 |
| ITGA9    | 0.004601 | 18 | -11.66779912 | 0.038462 | 0.9991 |
| RAD54B   | 0.004635 | 5  | -6.232462882 | 0.010684 | 0.9991 |
| INSRR    | 0.004674 | 21 | -12.53814109 | 0.044872 | 0.9991 |
| LAMC1    | 0.004688 | 26 | -13.86821182 | 0.055556 | 0.9991 |
| PLXNB3   | 0.004697 | 28 | -14.35613436 | 0.059829 | 0.9991 |
| CSMD3    | 0.004716 | 84 | -23.21893068 | 0.179487 | 0.9991 |
| NCOA7    | 0.004776 | 23 | -13.0603367  | 0.049145 | 0.9991 |
| POLE     | 0.004859 | 37 | -16.27031455 | 0.07906  | 0.9991 |
| MYH11    | 0.004884 | 46 | -17.9406382  | 0.098291 | 0.9991 |
| CXCR4    | 0.004968 | 6  | -6.766414978 | 0.012821 | 0.9991 |
| ROR2     | 0.005138 | 24 | -13.21524268 | 0.051282 | 0.9991 |
| MMP16    | 0.005537 | 22 | -12.57117621 | 0.047009 | 0.9991 |
| DAB2     | 0.005616 | 14 | -10.10110324 | 0.029915 | 0.9991 |
| TNFRSF1A | 0.005636 | 7  | -7.194348435 | 0.014957 | 0.9991 |
| ABCA3    | 0.005717 | 40 | -16.54294037 | 0.08547  | 0.9991 |
| ITPR2    | 0.005743 | 40 | -16.53425914 | 0.08547  | 0.9991 |
| ERN2     | 0.005819 | 20 | -11.9428252  | 0.042735 | 0.9991 |
| PPP1R3A  | 0.005825 | 27 | -13.76581637 | 0.057692 | 0.9991 |

|          |          |     |              |          |        |
|----------|----------|-----|--------------|----------|--------|
| ICK      | 0.005854 | 11  | -8.939254628 | 0.023504 | 0.9991 |
| PRKACA   | 0.005859 | 7   | -7.16148805  | 0.014957 | 0.9991 |
| RNF123   | 0.005924 | 18  | -11.33121385 | 0.038462 | 0.9991 |
| CHD8     | 0.005927 | 34  | -15.29277957 | 0.07265  | 0.9991 |
| MST1R    | 0.005972 | 31  | -14.63988236 | 0.066239 | 0.9991 |
| CELSR2   | 0.006034 | 61  | -19.7943456  | 0.130342 | 0.9991 |
| ROCK2    | 0.006133 | 20  | -11.86820615 | 0.042735 | 0.9991 |
| NRK      | 0.006211 | 28  | -13.8956633  | 0.059829 | 0.9991 |
| MAPK3    | 0.006278 | 7   | -7.102551443 | 0.014957 | 0.9991 |
| DCC      | 0.006464 | 32  | -14.71618367 | 0.068376 | 0.9991 |
| SULT1A1  | 0.006593 | 7   | -7.06046496  | 0.014957 | 0.9991 |
| ROS1     | 0.006599 | 30  | -14.24587014 | 0.064103 | 0.9991 |
| AKAP6    | 0.006758 | 34  | -15.05253693 | 0.07265  | 0.9991 |
| BAI2     | 0.006806 | 27  | -13.50976522 | 0.057692 | 0.9991 |
| ITGA10   | 0.006883 | 23  | -12.50804092 | 0.049145 | 0.9991 |
| LPHN3    | 0.006885 | 38  | -15.80363474 | 0.081197 | 0.9991 |
| RIPK4    | 0.007148 | 22  | -12.18981314 | 0.047009 | 0.9991 |
| CDH2     | 0.00715  | 21  | -11.92261859 | 0.044872 | 0.9991 |
| ZMYM4    | 0.007499 | 17  | -10.71117344 | 0.036325 | 0.9991 |
| MAP3K5   | 0.007577 | 15  | -10.07051152 | 0.032051 | 0.9991 |
| NCK2     | 0.007666 | 6   | -6.422742124 | 0.012821 | 0.9991 |
| SYNE1    | 0.00778  | 157 | -26.90572396 | 0.33547  | 0.9991 |
| TRIM37   | 0.007869 | 14  | -9.693391328 | 0.029915 | 0.9991 |
| ACAP1    | 0.007972 | 8   | -7.363611623 | 0.017094 | 0.9991 |
| APC2     | 0.007979 | 27  | -13.24399322 | 0.057692 | 0.9991 |
| TRIO     | 0.00803  | 29  | -13.68360476 | 0.061966 | 0.9991 |
| LRP6     | 0.008145 | 22  | -11.99106062 | 0.047009 | 0.9991 |
| NIM1     | 0.008248 | 11  | -8.569084303 | 0.023504 | 0.9991 |
| PRKCH    | 0.008256 | 10  | -8.178220991 | 0.021368 | 0.9991 |
| PPP2R2B  | 0.008446 | 8   | -7.309331157 | 0.017094 | 0.9991 |
| CHUK     | 0.008455 | 5   | -5.796566001 | 0.010684 | 0.9991 |
| CAD      | 0.008537 | 34  | -14.6163096  | 0.07265  | 0.9991 |
| CYLD     | 0.008567 | 6   | -6.332195564 | 0.012821 | 0.9991 |
| ANKRD32  | 0.008659 | 10  | -8.128161028 | 0.021368 | 0.9991 |
| PALB2    | 0.008741 | 19  | -11.07968138 | 0.040598 | 0.9991 |
| COL1A1   | 0.008826 | 33  | -14.3542208  | 0.070513 | 0.9991 |
| ABCA1    | 0.009116 | 32  | -14.09168369 | 0.068376 | 0.9991 |
| ALS2     | 0.009232 | 22  | -11.79772268 | 0.047009 | 0.9991 |
| PIK3CD   | 0.009261 | 10  | -8.056995478 | 0.021368 | 0.9991 |
| NUAK2    | 0.009266 | 17  | -10.42376759 | 0.036325 | 0.9991 |
| PIK3C2B  | 0.00947  | 27  | -12.95272434 | 0.057692 | 0.9991 |
| HSP90AB1 | 0.009515 | 12  | -8.775261199 | 0.025641 | 0.9991 |
| TSHR     | 0.009583 | 17  | -10.3774377  | 0.036325 | 0.9991 |
| XPC      | 0.009668 | 11  | -8.393075055 | 0.023504 | 0.9991 |
| RHOBTB2  | 0.009695 | 23  | -11.9714848  | 0.049145 | 0.9991 |
| NFKBIE   | 0.009701 | 6   | -6.229669137 | 0.012821 | 0.9991 |

|         |          |     |              |          |        |
|---------|----------|-----|--------------|----------|--------|
| FBXW7   | 0.009774 | 57  | -18.09244441 | 0.121795 | 0.9991 |
| PKHD1   | 0.009818 | 78  | -20.60406227 | 0.166667 | 0.9991 |
| FLI1    | 0.01005  | 10  | -7.969838853 | 0.021368 | 0.9991 |
| WNK4    | 0.01011  | 26  | -12.61443887 | 0.055556 | 0.9991 |
| FIGF    | 0.010329 | 7   | -6.665195677 | 0.014957 | 0.9991 |
| CHKB    | 0.010612 | 12  | -8.647512391 | 0.025641 | 0.9991 |
| ZBTB16  | 0.010656 | 14  | -9.314632876 | 0.029915 | 0.9991 |
| SETD2   | 0.010721 | 34  | -14.18065522 | 0.07265  | 0.9991 |
| USP43   | 0.010743 | 16  | -9.924835694 | 0.034188 | 0.9991 |
| EXT2    | 0.010749 | 17  | -10.21818239 | 0.036325 | 0.9991 |
| TGFBR1  | 0.010899 | 11  | -8.258310353 | 0.023504 | 0.9991 |
| CD44    | 0.011032 | 14  | -9.270509425 | 0.029915 | 0.9991 |
| FSCB    | 0.01121  | 21  | -11.24124474 | 0.044872 | 0.9991 |
| meta    | 0.011211 | 169 | 26.08111006  | 0.361111 | 0.9991 |
| wnt     | 0.011221 | 51  | -16.91785983 | 0.108974 | 0.9991 |
| BCL9L   | 0.011491 | 37  | -14.60166004 | 0.07906  | 0.9991 |
| SMARCB1 | 0.011586 | 8   | -7.006292046 | 0.017094 | 0.9991 |
| d_meta  | 0.011784 | 165 | 25.76333634  | 0.352564 | 0.9991 |
| RECQL4  | 0.011914 | 33  | -13.78392458 | 0.070513 | 0.9991 |
| EPHA1   | 0.011919 | 26  | -12.33235111 | 0.055556 | 0.9991 |
| LTF     | 0.01202  | 21  | -11.13264366 | 0.044872 | 0.9991 |
| RAPH1   | 0.012046 | 13  | -8.834475828 | 0.027778 | 0.9991 |
| TRIB3   | 0.012344 | 12  | -8.467901349 | 0.025641 | 0.9991 |
| REV3L   | 0.012665 | 41  | -15.09133271 | 0.087607 | 0.9991 |
| RNF213  | 0.012807 | 57  | -17.42972863 | 0.121795 | 0.9991 |
| CYP1B1  | 0.012823 | 13  | -8.756513255 | 0.027778 | 0.9991 |
| INPP4A  | 0.012948 | 12  | -8.410554199 | 0.025641 | 0.9991 |
| KEAP1   | 0.013245 | 14  | -9.03495477  | 0.029915 | 0.9991 |
| ROCK1   | 0.013396 | 13  | -8.701714893 | 0.027778 | 0.9991 |
| TAF1L   | 0.013496 | 56  | -17.16716593 | 0.119658 | 0.9991 |
| EPHB2   | 0.01366  | 24  | -11.6465003  | 0.051282 | 0.9991 |
| NOTCH3  | 0.013782 | 44  | -15.39028916 | 0.094017 | 0.9991 |
| EPHA10  | 0.013817 | 25  | -11.8534792  | 0.053419 | 0.9991 |
| ITGB3   | 0.014189 | 18  | -10.09788385 | 0.038462 | 0.9991 |
| TUBD1   | 0.014497 | 8   | -6.784860931 | 0.017094 | 0.9991 |
| CASC5   | 0.014554 | 28  | -12.40710673 | 0.059829 | 0.9991 |
| ITK     | 0.014575 | 10  | -7.563172389 | 0.021368 | 0.9991 |
| PHOX2B  | 0.01459  | 10  | -7.562016156 | 0.021368 | 0.9991 |
| PREX1   | 0.015275 | 25  | -11.67926001 | 0.053419 | 0.9991 |
| HECW2   | 0.015307 | 28  | -12.31437751 | 0.059829 | 0.9991 |
| NFKB1   | 0.015491 | 11  | -7.85205996  | 0.023504 | 0.9991 |
| ERG     | 0.015579 | 11  | -7.845395122 | 0.023504 | 0.9991 |
| TSPAN31 | 0.015605 | 5   | 5.322604525  | 0.010684 | 0.9991 |
| EIF2AK1 | 0.015742 | 12  | -8.172411292 | 0.025641 | 0.9991 |
| LRRK2   | 0.015757 | 45  | -15.24030508 | 0.096154 | 0.9991 |
| MDC1    | 0.015919 | 18  | -9.926345434 | 0.038462 | 0.9991 |

|           |          |     |              |          |        |
|-----------|----------|-----|--------------|----------|--------|
| TAF15     | 0.015936 | 7   | -6.264310702 | 0.014957 | 0.9991 |
| NOTCH1    | 0.01628  | 49  | -15.74975469 | 0.104701 | 0.9991 |
| FGFR1     | 0.016313 | 12  | -8.128390038 | 0.025641 | 0.9991 |
| RASGRP1   | 0.016404 | 7   | -6.236850661 | 0.014957 | 0.9991 |
| ABL2      | 0.016435 | 14  | -8.750501815 | 0.029915 | 0.9991 |
| ACVR2A    | 0.016541 | 15  | -9.038760401 | 0.032051 | 0.9991 |
| NCDN      | 0.016646 | 5   | -5.270699046 | 0.010684 | 0.9991 |
| ETV4      | 0.01671  | 10  | -7.409152579 | 0.021368 | 0.9991 |
| NUP153    | 0.016748 | 17  | -9.582908354 | 0.036325 | 0.9991 |
| MLH1      | 0.017143 | 23  | -11.03247472 | 0.049145 | 0.9991 |
| BMX       | 0.017236 | 7   | -6.189611881 | 0.014957 | 0.9991 |
| JAK1      | 0.017275 | 12  | -8.057218691 | 0.025641 | 0.9991 |
| UBP1      | 0.017333 | 5   | -5.237968529 | 0.010684 | 0.9991 |
| RAPGEF2   | 0.017335 | 23  | -11.01341892 | 0.049145 | 0.9991 |
| TCF3      | 0.017499 | 22  | -10.76775758 | 0.047009 | 0.9991 |
| ABCC3     | 0.017556 | 23  | -10.99179623 | 0.049145 | 0.9991 |
| WNT9B     | 0.017559 | 5   | -5.227456081 | 0.010684 | 0.9991 |
| HOXA9     | 0.017596 | 8   | -6.588630799 | 0.017094 | 0.9991 |
| PLCB4     | 0.017726 | 10  | -7.341888468 | 0.021368 | 0.9991 |
| CDK12     | 0.017895 | 16  | -9.212157598 | 0.034188 | 0.9991 |
| NCOA2     | 0.018017 | 23  | -10.94750854 | 0.049145 | 0.9991 |
| TBX22     | 0.018139 | 10  | -7.315494549 | 0.021368 | 0.9991 |
| IRS4      | 0.018396 | 34  | -13.10194735 | 0.07265  | 0.9991 |
| PAK4      | 0.01841  | 14  | -8.597848595 | 0.029915 | 0.9991 |
| NTRK1     | 0.018647 | 24  | -11.11013273 | 0.051282 | 0.9991 |
| BPTF      | 0.018699 | 33  | -12.88937794 | 0.070513 | 0.9991 |
| ERBB4     | 0.019083 | 28  | -11.90246834 | 0.059829 | 0.9991 |
| OBSCN     | 0.019087 | 148 | -23.33576467 | 0.316239 | 0.9991 |
| WRN       | 0.019224 | 18  | -9.639665329 | 0.038462 | 0.9991 |
| TECTA     | 0.01946  | 41  | -14.144306   | 0.087607 | 0.9991 |
| MGA       | 0.019583 | 37  | -13.48580173 | 0.07906  | 0.9991 |
| IKBKAP    | 0.019646 | 19  | -9.858507848 | 0.040598 | 0.9991 |
| NLRP3     | 0.019677 | 20  | -10.10080515 | 0.042735 | 0.9991 |
| CYP3A4    | 0.019764 | 5   | -5.130602283 | 0.010684 | 0.9991 |
| HNF1A     | 0.02031  | 15  | -8.751414413 | 0.032051 | 0.9991 |
| AURKB     | 0.020417 | 9   | -6.817772327 | 0.019231 | 0.9991 |
| RBPJ      | 0.020602 | 8   | -6.42545623  | 0.017094 | 0.9991 |
| PRKD1     | 0.020852 | 18  | -9.51409128  | 0.038462 | 0.9991 |
| CDH5      | 0.021478 | 18  | -9.468052249 | 0.038462 | 0.9991 |
| ADH7      | 0.021524 | 9   | -6.759147577 | 0.019231 | 0.9991 |
| CREBBP    | 0.021778 | 49  | -15.03933332 | 0.104701 | 0.9991 |
| RPS6      | 0.021918 | 5   | -5.044735261 | 0.010684 | 0.9991 |
| TNFRSF11A | 0.022174 | 17  | -9.163015493 | 0.036325 | 0.9991 |
| ABCB1     | 0.02269  | 16  | -8.865248674 | 0.034188 | 0.9991 |
| MITF      | 0.022881 | 14  | -8.299306898 | 0.029915 | 0.9991 |
| CCKAR     | 0.02294  | 9   | -6.687908527 | 0.019231 | 0.9991 |

|           |          |     |              |          |        |
|-----------|----------|-----|--------------|----------|--------|
| ARID1A    | 0.023105 | 51  | -15.15629337 | 0.108974 | 0.9991 |
| PAK6      | 0.0233   | 10  | -7.023538501 | 0.021368 | 0.9991 |
| GRB10     | 0.023497 | 9   | -6.660912614 | 0.019231 | 0.9991 |
| FANCD2    | 0.023502 | 17  | -9.074133557 | 0.036325 | 0.9991 |
| MAG1      | 0.023553 | 31  | -12.05737699 | 0.066239 | 0.9991 |
| GNAS      | 0.023703 | 45  | -14.27710976 | 0.096154 | 0.9991 |
| GPR84     | 0.024093 | 10  | -6.983808645 | 0.021368 | 0.9991 |
| EXOC4     | 0.024318 | 12  | -7.621568242 | 0.025641 | 0.9991 |
| NFKB2     | 0.024384 | 11  | -7.301729699 | 0.023504 | 0.9991 |
| MYST4     | 0.024663 | 27  | -11.21562853 | 0.057692 | 0.9991 |
| PRKD2     | 0.024947 | 7   | -5.827323795 | 0.014957 | 0.9991 |
| FPR3      | 0.024978 | 13  | -7.88775436  | 0.027778 | 0.9991 |
| PHF20     | 0.025243 | 11  | -7.258377113 | 0.023504 | 0.9991 |
| MUC16     | 0.025281 | 187 | -23.46099133 | 0.399573 | 0.9991 |
| THRAP3    | 0.025549 | 14  | -8.144608242 | 0.029915 | 0.9991 |
| EEF2K     | 0.02557  | 8   | -6.196409041 | 0.017094 | 0.9991 |
| HERC3     | 0.025601 | 12  | -7.5543474   | 0.025641 | 0.9991 |
| XPA       | 0.025691 | 6   | -5.373500848 | 0.012821 | 0.9991 |
| MAPT      | 0.025816 | 17  | -8.929106594 | 0.036325 | 0.9991 |
| UHRF1BP1L | 0.026011 | 22  | -10.08797595 | 0.047009 | 0.9991 |
| EP400     | 0.026192 | 40  | -13.30912606 | 0.08547  | 0.9991 |
| NF2       | 0.026261 | 6   | -5.352983974 | 0.012821 | 0.9991 |
| MAST4     | 0.026583 | 44  | -13.8573765  | 0.094017 | 0.9991 |
| INPPL1    | 0.026766 | 18  | -9.119876156 | 0.038462 | 0.9991 |
| CHEK2     | 0.02724  | 16  | -8.590723997 | 0.034188 | 0.9991 |
| MEF2C     | 0.027314 | 11  | -7.158900118 | 0.023504 | 0.9991 |
| MN1       | 0.027497 | 15  | -8.313263499 | 0.032051 | 0.9991 |
| UVRAG     | 0.028131 | 13  | -7.724897043 | 0.027778 | 0.9991 |
| RAD18     | 0.029069 | 7   | -5.672239528 | 0.014957 | 0.9991 |
| FGFR4     | 0.029083 | 16  | -8.490735791 | 0.034188 | 0.9991 |
| STAT3     | 0.029526 | 6   | -5.242310589 | 0.012821 | 0.9991 |
| ULK2      | 0.029667 | 13  | -7.65118829  | 0.027778 | 0.9991 |
| COL7A1    | 0.029962 | 55  | -14.96668667 | 0.117521 | 0.9991 |
| VEGFC     | 0.030244 | 20  | -9.383804153 | 0.042735 | 0.9991 |
| CYP3A5    | 0.030913 | 11  | -7.00057478  | 0.023504 | 0.9991 |
| MKRN3     | 0.03093  | 24  | -10.1913722  | 0.051282 | 0.9991 |
| NFKBIZ    | 0.031016 | 7   | -5.605484885 | 0.014957 | 0.9991 |
| PAX3      | 0.03168  | 16  | -8.358735089 | 0.034188 | 0.9991 |
| SGK1      | 0.031721 | 9   | -6.315863376 | 0.019231 | 0.9991 |
| MYEOV     | 0.031924 | 8   | -5.954057717 | 0.017094 | 0.9991 |
| TERT      | 0.032074 | 17  | -8.586648303 | 0.036325 | 0.9991 |
| CENPF     | 0.032346 | 40  | -12.81082021 | 0.08547  | 0.9991 |
| NOTCH4    | 0.032812 | 41  | -12.92014927 | 0.087607 | 0.9991 |
| PLCG2     | 0.032981 | 29  | -11.0070935  | 0.061966 | 0.9991 |
| MAP3K11   | 0.033205 | 17  | -8.531000471 | 0.036325 | 0.9991 |
| DIP2C     | 0.033249 | 21  | -9.437152044 | 0.044872 | 0.9991 |

|         |          |    |              |          |        |
|---------|----------|----|--------------|----------|--------|
| DDR1    | 0.033612 | 9  | -6.247608162 | 0.019231 | 0.9991 |
| KDM5C   | 0.033866 | 15 | -8.001322312 | 0.032051 | 0.9991 |
| FBXO10  | 0.033896 | 16 | -8.253185621 | 0.034188 | 0.9991 |
| CNTN1   | 0.034249 | 23 | -9.79899721  | 0.049145 | 0.9991 |
| ADCY1   | 0.034304 | 20 | -9.16552536  | 0.042735 | 0.9991 |
| ZMYM2   | 0.034582 | 17 | -8.465400837 | 0.036325 | 0.9991 |
| PIM1    | 0.034769 | 6  | -5.084896843 | 0.012821 | 0.9991 |
| UBR5    | 0.035047 | 22 | -9.552161782 | 0.047009 | 0.9991 |
| FRMD7   | 0.035135 | 12 | -7.129957764 | 0.025641 | 0.9991 |
| ITCH    | 0.035679 | 14 | -7.66158887  | 0.029915 | 0.9991 |
| DAXX    | 0.035726 | 10 | -6.502039664 | 0.021368 | 0.9991 |
| DCLK3   | 0.035741 | 14 | -7.658989637 | 0.029915 | 0.9991 |
| RGL1    | 0.0362   | 14 | -7.640082675 | 0.029915 | 0.9991 |
| PTPN6   | 0.036324 | 12 | -7.084203337 | 0.025641 | 0.9991 |
| RPS6KB2 | 0.036831 | 9  | -6.138639188 | 0.019231 | 0.9991 |
| DLG1    | 0.036859 | 5  | -4.594688395 | 0.010684 | 0.9991 |
| MDM4    | 0.037005 | 10 | -6.457667132 | 0.021368 | 0.9991 |
| NUP214  | 0.037127 | 28 | -10.58447397 | 0.059829 | 0.9991 |
| CDKN2A  | 0.037264 | 6  | -5.01702943  | 0.012821 | 0.9991 |
| TP53BP1 | 0.037397 | 19 | -8.79522783  | 0.040598 | 0.9991 |
| LTK     | 0.037505 | 22 | -9.427095086 | 0.047009 | 0.9991 |
| RBL1    | 0.037546 | 13 | -7.317851575 | 0.027778 | 0.9991 |
| GRM5    | 0.037867 | 23 | -9.609986946 | 0.049145 | 0.9991 |
| SYK     | 0.037915 | 9  | -6.103751438 | 0.019231 | 0.9991 |
| TET2    | 0.037978 | 28 | -10.53736875 | 0.059829 | 0.9991 |
| ADRA1A  | 0.038245 | 12 | -7.012904522 | 0.025641 | 0.9991 |
| FOXM1   | 0.038442 | 13 | -7.283835433 | 0.027778 | 0.9991 |
| ESR1    | 0.038964 | 17 | -8.270490323 | 0.036325 | 0.9991 |
| FGFR2   | 0.039096 | 8  | -5.725988618 | 0.017094 | 0.9991 |
| ETV1    | 0.039142 | 11 | -6.690806865 | 0.023504 | 0.9991 |
| N4BP2   | 0.039183 | 23 | -9.545012954 | 0.049145 | 0.9991 |
| LRP5    | 0.039266 | 28 | -10.46779422 | 0.059829 | 0.9991 |
| FANCM   | 0.039337 | 34 | -11.45186889 | 0.07265  | 0.9991 |
| SRPK2   | 0.039427 | 8  | -5.716345005 | 0.017094 | 0.9991 |
| IRAK2   | 0.039498 | 15 | -7.764836332 | 0.032051 | 0.9991 |
| ATRX    | 0.039599 | 28 | -10.45009882 | 0.059829 | 0.9991 |
| STIM1   | 0.039846 | 12 | -6.955788871 | 0.025641 | 0.9991 |
| DLL4    | 0.040035 | 9  | -6.037929582 | 0.019231 | 0.9991 |
| PIK3R2  | 0.040255 | 14 | -7.481233548 | 0.029915 | 0.9991 |
| PPP2R3A | 0.04073  | 20 | -8.861498425 | 0.042735 | 0.9991 |
| TYK2    | 0.040816 | 24 | -9.659713998 | 0.051282 | 0.9991 |
| TCF4    | 0.040819 | 9  | -6.014353115 | 0.019231 | 0.9991 |
| NIN     | 0.040935 | 33 | -11.20502881 | 0.070513 | 0.9991 |
| ALK     | 0.040981 | 22 | -9.261694141 | 0.047009 | 0.9991 |
| PXN     | 0.041267 | 17 | -8.175440432 | 0.036325 | 0.9991 |
| TOP2B   | 0.041371 | 13 | -7.177154076 | 0.027778 | 0.9991 |

|         |          |    |              |          |        |
|---------|----------|----|--------------|----------|--------|
| PDGFRA  | 0.041487 | 21 | -9.036307517 | 0.044872 | 0.9991 |
| BRCA2   | 0.041529 | 56 | -14.16382326 | 0.119658 | 0.9991 |
| VAV1    | 0.041842 | 14 | -7.422742478 | 0.029915 | 0.9991 |
| PAX5    | 0.042011 | 10 | -6.295755227 | 0.021368 | 0.9991 |
| VEGFA   | 0.042051 | 5  | -4.475126913 | 0.010684 | 0.9991 |
| INPP4B  | 0.042455 | 7  | -5.273261651 | 0.014957 | 0.9991 |
| ARHGAP6 | 0.042484 | 20 | -8.78562322  | 0.042735 | 0.9991 |
| LIG4    | 0.0426   | 18 | -8.348663624 | 0.038462 | 0.9991 |
| IRF4    | 0.0429   | 8  | -5.61914867  | 0.017094 | 0.9991 |
| ELP2    | 0.043456 | 7  | -5.247949007 | 0.014957 | 0.9991 |
| HOXD13  | 0.043495 | 7  | -5.246979003 | 0.014957 | 0.9991 |
| XIAP    | 0.04448  | 10 | -6.221842364 | 0.021368 | 0.9991 |
| RPS6KA1 | 0.044546 | 15 | -7.576113429 | 0.032051 | 0.9991 |
| PTPRD   | 0.045088 | 38 | -11.71865508 | 0.081197 | 0.9991 |
| DDX10   | 0.045433 | 18 | -8.237526354 | 0.038462 | 0.9991 |
| CDC25A  | 0.045721 | 7  | -5.192487201 | 0.014957 | 0.9991 |
| ITGB2   | 0.046367 | 17 | -7.979940901 | 0.036325 | 0.9991 |
| PRKCE   | 0.046969 | 17 | -7.95809529  | 0.036325 | 0.9991 |
| DGKZ    | 0.047064 | 13 | -6.986922899 | 0.027778 | 0.9991 |
| PPARG   | 0.047149 | 5  | -4.369359508 | 0.010684 | 0.9991 |
| SOS1    | 0.047186 | 20 | -8.59455815  | 0.042735 | 0.9991 |
| TET1    | 0.047279 | 5  | 4.366782892  | 0.010684 | 0.9991 |
| ALPK3   | 0.047435 | 29 | -10.23321777 | 0.061966 | 0.9991 |
| PAX7    | 0.04788  | 13 | -6.961270424 | 0.027778 | 0.9991 |
| TRIM33  | 0.047991 | 8  | -5.488067205 | 0.017094 | 0.9991 |
| ESR2    | 0.048173 | 13 | -6.95216019  | 0.027778 | 0.9991 |
| NFKBIB  | 0.048527 | 7  | -5.126907528 | 0.014957 | 0.9991 |
| PRKCZ   | 0.048787 | 8  | -5.468637804 | 0.017094 | 0.9991 |
| RFC4    | 0.049096 | 6  | -4.739785816 | 0.012821 | 0.9991 |
| DDB1    | 0.049485 | 5  | -4.32406573  | 0.010684 | 0.9991 |
| MLLT6   | 0.049561 | 23 | -9.088998168 | 0.049145 | 0.9991 |
| PTCH1   | 0.049628 | 19 | -8.295530126 | 0.040598 | 0.9991 |
| DDB2    | 0.050899 | 6  | -4.702611708 | 0.012821 | 0.9991 |
| WSB1    | 0.051966 | 9  | -5.714573349 | 0.019231 | 0.9991 |
| RASA3   | 0.052246 | 12 | -6.569171047 | 0.025641 | 0.9991 |
| LRP1B   | 0.052773 | 95 | -16.67956421 | 0.202991 | 0.9991 |
| OR8G5   | 0.054641 | 5  | -4.230146234 | 0.010684 | 0.9991 |
| AKAP9   | 0.054648 | 41 | -11.63248943 | 0.087607 | 0.9991 |
| IQGAP1  | 0.054725 | 21 | -8.515159405 | 0.044872 | 0.9991 |
| CA9     | 0.055617 | 10 | -5.926105746 | 0.021368 | 0.9991 |
| CASK    | 0.056637 | 11 | -6.182862189 | 0.023504 | 0.9991 |
| RPS6KA3 | 0.05694  | 5  | -4.190633494 | 0.010684 | 0.9991 |
| COL11A1 | 0.057671 | 33 | -10.40472725 | 0.070513 | 0.9991 |
| TFEB    | 0.058053 | 8  | -5.26007494  | 0.017094 | 0.9991 |
| FN1     | 0.058294 | 41 | -11.46191101 | 0.087607 | 0.9991 |
| PTPRF   | 0.058421 | 24 | -8.937752921 | 0.051282 | 0.9991 |



|         |          |    |              |          |        |
|---------|----------|----|--------------|----------|--------|
| MAG     | 0.058516 | 15 | -7.134490172 | 0.032051 | 0.9991 |
| POLL    | 0.058709 | 8  | -5.24638897  | 0.017094 | 0.9991 |
| ABL1    | 0.059275 | 22 | -8.547603871 | 0.047009 | 0.9991 |
| PRDM5   | 0.059368 | 5  | -4.150332133 | 0.010684 | 0.9991 |
| MAP3K2  | 0.059697 | 8  | -5.225997638 | 0.017094 | 0.9991 |
| UBR4    | 0.059906 | 54 | -12.87026294 | 0.115385 | 0.9991 |
| WNK2    | 0.059975 | 23 | -8.705980258 | 0.049145 | 0.9991 |
| NFKBID  | 0.060231 | 8  | -5.21511502  | 0.017094 | 0.9991 |
| UGT1A1  | 0.060333 | 5  | -4.134690746 | 0.010684 | 0.9991 |
| BAI1    | 0.061257 | 22 | -8.481847967 | 0.047009 | 0.9991 |
| TRAF1   | 0.061429 | 11 | -6.067055101 | 0.023504 | 0.9991 |
| BRD3    | 0.061452 | 9  | -5.499367128 | 0.019231 | 0.9991 |
| ZNF148  | 0.061633 | 6  | -4.501723134 | 0.012821 | 0.9991 |
| MAP3K8  | 0.061758 | 11 | -6.059381998 | 0.023504 | 0.9991 |
| CMAS    | 0.062576 | 7  | -4.83965816  | 0.014957 | 0.9991 |
| STAT5A  | 0.062587 | 7  | -4.839450948 | 0.014957 | 0.9991 |
| PLCH1   | 0.062898 | 26 | -9.121803815 | 0.055556 | 0.9991 |
| KDM1A   | 0.063159 | 7  | -4.828939205 | 0.014957 | 0.9991 |
| PFKFB2  | 0.06325  | 11 | -6.024998087 | 0.023504 | 0.9991 |
| LDHA    | 0.063666 | 7  | -4.819691376 | 0.014957 | 0.9991 |
| PIK3R1  | 0.064007 | 20 | -8.020750663 | 0.042735 | 0.9991 |
| IGF2R   | 0.064495 | 39 | -10.94026419 | 0.083333 | 0.9991 |
| VRTN    | 0.064804 | 26 | -9.056544721 | 0.055556 | 0.9991 |
| HDAC9   | 0.064912 | 24 | -8.717378584 | 0.051282 | 0.9991 |
| PDK1    | 0.064932 | 9  | -5.427309974 | 0.019231 | 0.9991 |
| RUNX1T1 | 0.064968 | 17 | -7.392843296 | 0.036325 | 0.9991 |
| CDC25B  | 0.064995 | 14 | -6.73049391  | 0.029915 | 0.9991 |
| ARID3A  | 0.065399 | 13 | -6.483046788 | 0.027778 | 0.9991 |
| PIK3CG  | 0.065797 | 30 | -9.648494956 | 0.064103 | 0.9991 |
| FLT1    | 0.06591  | 18 | -7.572211624 | 0.038462 | 0.9991 |
| TEX14   | 0.066177 | 28 | -9.329476335 | 0.059829 | 0.9991 |
| REL     | 0.066837 | 8  | -5.08652108  | 0.017094 | 0.9991 |
| FANCA   | 0.067893 | 22 | -8.273730176 | 0.047009 | 0.9991 |
| IL12B   | 0.068586 | 11 | -5.907265854 | 0.023504 | 0.9991 |
| ETV5    | 0.068587 | 6  | -4.386600381 | 0.012821 | 0.9991 |
| EPHB6   | 0.068648 | 22 | -8.251145285 | 0.047009 | 0.9991 |
| NTRK2   | 0.069502 | 11 | -5.887820674 | 0.023504 | 0.9991 |
| KIT     | 0.069646 | 23 | -8.396933942 | 0.049145 | 0.9991 |
| BUB1    | 0.069669 | 16 | -7.057802792 | 0.034188 | 0.9991 |
| DLL1    | 0.069888 | 13 | -6.377911195 | 0.027778 | 0.9991 |
| NEIL3   | 0.070104 | 11 | -5.875156706 | 0.023504 | 0.9991 |
| ERCC6   | 0.070356 | 40 | -10.83245359 | 0.08547  | 0.9991 |
| MARK4   | 0.071947 | 9  | -5.291255978 | 0.019231 | 0.9991 |
| POLQ    | 0.071962 | 48 | -11.68832262 | 0.102564 | 0.9991 |
| PDGFRL  | 0.072051 | 10 | -5.569352469 | 0.021368 | 0.9991 |
| POLN    | 0.072132 | 11 | -5.83315295  | 0.023504 | 0.9991 |

|                  |          |     |              |          |        |
|------------------|----------|-----|--------------|----------|--------|
| STAT4            | 0.072619 | 11  | -5.823202134 | 0.023504 | 0.9991 |
| CD34             | 0.073141 | 5   | -3.944495518 | 0.010684 | 0.9991 |
| NCK1             | 0.075106 | 5   | -3.917783021 | 0.010684 | 0.9991 |
| TRAF4            | 0.075137 | 5   | -3.917370192 | 0.010684 | 0.9991 |
| PIK3CA           | 0.075426 | 71  | -13.65567176 | 0.151709 | 0.9991 |
| TRIP11           | 0.075472 | 23  | -8.227437655 | 0.049145 | 0.9991 |
| FANCE            | 0.075601 | 11  | -5.763458166 | 0.023504 | 0.9991 |
| EP300            | 0.075605 | 43  | -10.98882528 | 0.09188  | 0.9991 |
| CCBP2            | 0.07631  | 9   | -5.212022667 | 0.019231 | 0.9991 |
| MET              | 0.077685 | 22  | -7.995329792 | 0.047009 | 0.9991 |
| MAPK10           | 0.077856 | 9   | -5.184839761 | 0.019231 | 0.9991 |
| EPHA3            | 0.078162 | 19  | -7.443225616 | 0.040598 | 0.9991 |
| ULK1             | 0.078289 | 30  | -9.233650041 | 0.064103 | 0.9991 |
| BAP1             | 0.078579 | 10  | -5.446116823 | 0.021368 | 0.9991 |
| MEN1             | 0.078671 | 7   | -4.5700272   | 0.014957 | 0.9991 |
| GRIN2A           | 0.079427 | 33  | -9.614479452 | 0.070513 | 0.9991 |
| HIPK2            | 0.079452 | 22  | -7.94818285  | 0.047009 | 0.9991 |
| BCL2L14          | 0.079524 | 7   | -4.557043983 | 0.014957 | 0.9991 |
| TNFRSF8          | 0.080665 | 13  | -6.146396321 | 0.027778 | 0.9991 |
| SLC19A1          | 0.080861 | 7   | -4.536928677 | 0.014957 | 0.9991 |
| EPHB3            | 0.080994 | 19  | -7.373468868 | 0.040598 | 0.9991 |
| PREX2            | 0.083198 | 35  | -9.757126301 | 0.074786 | 0.9991 |
| MUC4             | 0.083236 | 242 | -18.53329934 | 0.517094 | 0.9991 |
| EPHA6            | 0.083299 | 25  | -8.338228443 | 0.053419 | 0.9991 |
| PRKAA2           | 0.083345 | 5   | -3.811642531 | 0.010684 | 0.9991 |
| SORL1            | 0.084069 | 26  | -8.472632755 | 0.055556 | 0.9991 |
| SIRT6            | 0.086327 | 6   | -4.131202279 | 0.012821 | 0.9991 |
| CABLES1          | 0.087061 | 6   | -4.121587795 | 0.012821 | 0.9991 |
| SLCO1B3          | 0.087836 | 22  | -7.735416611 | 0.047009 | 0.9991 |
| NGFR             | 0.08802  | 9   | -5.016267285 | 0.019231 | 0.9991 |
| CDC25C           | 0.088226 | 7   | -4.430680919 | 0.014957 | 0.9991 |
| ARHGEF11         | 0.088688 | 25  | -8.196203624 | 0.053419 | 0.9991 |
| RGL2             | 0.089385 | 11  | -5.509960453 | 0.023504 | 0.9991 |
| GATA1            | 0.089663 | 9   | -4.990507082 | 0.019231 | 0.9991 |
| SFRP2            | 0.089773 | 7   | -4.409280728 | 0.014957 | 0.9991 |
| CRHR1            | 0.090338 | 12  | -5.731636002 | 0.025641 | 0.9991 |
| FES              | 0.090681 | 15  | -6.380243146 | 0.032051 | 0.9991 |
| MAP2K2           | 0.092957 | 10  | -5.201549503 | 0.021368 | 0.9991 |
| RPS6KA6          | 0.093505 | 7   | -4.358857127 | 0.014957 | 0.9991 |
| NLRP1            | 0.0937   | 25  | -8.070229363 | 0.053419 | 0.9991 |
| WWP2             | 0.094413 | 12  | -5.660388644 | 0.025641 | 0.9991 |
| TIAM1            | 0.094435 | 44  | -10.450871   | 0.094017 | 0.9991 |
| BIVM_ERCC5_ERCC5 | 0.095464 | 15  | -6.287617286 | 0.032051 | 0.9991 |
| TBK1             | 0.095524 | 9   | -4.901634296 | 0.019231 | 0.9991 |
| ARAP3            | 0.095657 | 35  | -9.384633553 | 0.074786 | 0.9991 |
| DIS3             | 0.096238 | 14  | -6.066967846 | 0.029915 | 0.9991 |

|         |          |    |              |          |        |
|---------|----------|----|--------------|----------|--------|
| RASGRF2 | 0.096242 | 22 | -7.537935782 | 0.047009 | 0.9991 |
| PTPRG   | 0.097019 | 19 | -7.012327238 | 0.040598 | 0.9991 |
| DUSP10  | 0.098725 | 8  | -4.58224151  | 0.017094 | 0.9991 |
| HSD17B2 | 0.098898 | 10 | -5.109336946 | 0.021368 | 0.9991 |
| PTPN11  | 0.099445 | 10 | -5.101073143 | 0.021368 | 0.9991 |
| FGF3    | 0.099704 | 6  | -3.965459894 | 0.012821 | 0.9991 |
| SFN     | 0.09972  | 5  | -3.623691749 | 0.010684 | 0.9991 |
| UBA1    | 0.10017  | 12 | -5.563808052 | 0.025641 | 0.9991 |
| ATG16L1 | 0.101315 | 6  | -3.946715032 | 0.012821 | 0.9991 |
| SNAI3   | 0.101794 | 10 | -5.065981584 | 0.021368 | 0.9991 |
| TLR3    | 0.102149 | 13 | -5.75120623  | 0.027778 | 0.9991 |
| PES1    | 0.102557 | 22 | -7.398505773 | 0.047009 | 0.9991 |
| HSD11B1 | 0.104033 | 7  | -4.224795168 | 0.014957 | 0.9991 |
| ALOX15  | 0.104484 | 15 | -6.122591019 | 0.032051 | 0.9991 |
| FYN     | 0.105265 | 9  | -4.76311658  | 0.019231 | 0.9991 |
| PPM1L   | 0.106821 | 5  | -3.549811466 | 0.010684 | 0.9991 |
| PRKAG3  | 0.107106 | 13 | -5.669613096 | 0.027778 | 0.9991 |
| PIK3C2G | 0.107314 | 29 | -8.31285378  | 0.061966 | 0.9991 |
| AKT1    | 0.107616 | 13 | -5.661404176 | 0.027778 | 0.9991 |
| RET     | 0.108745 | 22 | -7.268343516 | 0.047009 | 0.9991 |
| TOP2A   | 0.109523 | 19 | -6.762422489 | 0.040598 | 0.9991 |
| SUFU    | 0.11025  | 6  | -3.846902329 | 0.012821 | 0.9991 |
| C9orf96 | 0.110515 | 15 | -6.018467072 | 0.032051 | 0.9991 |
| SLC2A3  | 0.110748 | 7  | -4.144824295 | 0.014957 | 0.9991 |
| TTK     | 0.110928 | 8  | -4.423962876 | 0.017094 | 0.9991 |
| CARD11  | 0.111155 | 29 | -8.223244517 | 0.061966 | 0.9991 |
| JAK2    | 0.111154 | 18 | -6.552195435 | 0.038462 | 0.9991 |
| AKT2    | 0.112355 | 7  | -4.126266783 | 0.014957 | 0.9991 |
| LHCGR   | 0.11237  | 14 | -5.790708981 | 0.029915 | 0.9991 |
| CASP2   | 0.113306 | 6  | -3.814222504 | 0.012821 | 0.9991 |
| TCF12   | 0.113461 | 12 | -5.356685016 | 0.025641 | 0.9991 |
| DNMT3B  | 0.114291 | 15 | -5.955533438 | 0.032051 | 0.9991 |
| CBFA2T3 | 0.115128 | 19 | -6.657703761 | 0.040598 | 0.9991 |
| IGFBP4  | 0.115916 | 5  | -3.46066088  | 0.010684 | 0.9991 |
| MAP4K4  | 0.116443 | 16 | -6.107818425 | 0.034188 | 0.9991 |
| STON2   | 0.118275 | 21 | -6.923883922 | 0.044872 | 0.9991 |
| MAGI3   | 0.118391 | 16 | -6.075445798 | 0.034188 | 0.9991 |
| BCL6    | 0.118562 | 14 | -5.692976247 | 0.029915 | 0.9991 |
| BCL11A  | 0.118584 | 13 | -5.49160436  | 0.027778 | 0.9991 |
| IDH2    | 0.122557 | 5  | -3.398981025 | 0.010684 | 0.9991 |
| ZNF442  | 0.122971 | 12 | -5.219951934 | 0.025641 | 0.9991 |
| LPHN2   | 0.124279 | 24 | -7.259011908 | 0.051282 | 0.9991 |
| SESN2   | 0.124621 | 5  | 3.380350409  | 0.010684 | 0.9991 |
| SMG1    | 0.124623 | 32 | -8.298538117 | 0.068376 | 0.9991 |
| SGK2    | 0.125671 | 8  | -4.250131916 | 0.017094 | 0.9991 |
| PTGFR   | 0.126076 | 10 | -4.73637029  | 0.021368 | 0.9991 |

|           |          |    |              |          |        |
|-----------|----------|----|--------------|----------|--------|
| LCP1      | 0.126195 | 6  | -3.683607422 | 0.012821 | 0.9991 |
| CD33      | 0.126245 | 13 | -5.380182888 | 0.027778 | 0.9991 |
| BIRC5     | 0.127309 | 6  | -3.672813723 | 0.012821 | 0.9991 |
| WNT2      | 0.127729 | 10 | -4.715804886 | 0.021368 | 0.9991 |
| DPYSL4    | 0.129268 | 8  | -4.210151415 | 0.017094 | 0.9991 |
| APBB1IP   | 0.13048  | 11 | 4.905208575  | 0.023504 | 0.9991 |
| PFKFB1    | 0.130995 | 10 | -4.675784613 | 0.021368 | 0.9991 |
| DLL3      | 0.132435 | 7  | -3.910220781 | 0.014957 | 0.9991 |
| BID       | 0.132806 | 10 | -4.653918134 | 0.021368 | 0.9991 |
| ROBO2     | 0.133655 | 48 | -9.742745427 | 0.102564 | 0.9991 |
| MAP2K1    | 0.134391 | 9  | -4.401913488 | 0.019231 | 0.9991 |
| ZEB1      | 0.134515 | 18 | -6.161953319 | 0.038462 | 0.9991 |
| UBASH3B   | 0.134839 | 11 | -4.85030905  | 0.023504 | 0.9991 |
| GTPBP4    | 0.135791 | 7  | -3.876651234 | 0.014957 | 0.9991 |
| PLA2G4A   | 0.136785 | 6  | -3.583864358 | 0.012821 | 0.9991 |
| BRD2      | 0.13714  | 21 | -6.589100528 | 0.044872 | 0.9991 |
| TTBK2     | 0.138831 | 13 | -5.20805926  | 0.027778 | 0.9991 |
| NOV       | 0.140655 | 6  | -3.548901305 | 0.012821 | 0.9991 |
| BCAT1     | 0.140752 | 11 | 4.778003627  | 0.023504 | 0.9991 |
| BIRC2     | 0.140892 | 9  | -4.32978344  | 0.019231 | 0.9991 |
| EPHB4     | 0.141819 | 14 | -5.358195211 | 0.029915 | 0.9991 |
| ROBO1     | 0.14238  | 38 | -8.579105914 | 0.081197 | 0.9991 |
| CDC42BPB  | 0.142388 | 20 | -6.35273398  | 0.042735 | 0.9991 |
| TSC2      | 0.144513 | 43 | -9.02464818  | 0.09188  | 0.9991 |
| MTOR      | 0.144763 | 35 | -8.213134858 | 0.074786 | 0.9991 |
| HEYL      | 0.145388 | 9  | -4.281381286 | 0.019231 | 0.9991 |
| MAP3K1    | 0.145602 | 22 | -6.594836013 | 0.047009 | 0.9991 |
| TNFRSF10B | 0.14714  | 6  | -3.491938049 | 0.012821 | 0.9991 |
| APOB      | 0.147193 | 82 | -11.7981435  | 0.175214 | 0.9991 |
| EPHA2     | 0.147498 | 24 | -6.840432329 | 0.051282 | 0.9991 |
| PTPN1     | 0.147849 | 9  | -4.255367008 | 0.019231 | 0.9991 |
| FAM123B   | 0.148357 | 46 | -9.212987587 | 0.098291 | 0.9991 |
| PTGS2     | 0.148377 | 5  | -3.18141077  | 0.010684 | 0.9991 |
| STK32B    | 0.14909  | 11 | -4.679903437 | 0.023504 | 0.9991 |
| PRKAG2    | 0.149846 | 11 | -4.671207211 | 0.023504 | 0.9991 |
| MERTK     | 0.150138 | 11 | -4.667872542 | 0.023504 | 0.9991 |
| ZNF217    | 0.150247 | 17 | -5.763166405 | 0.036325 | 0.9991 |
| TACR3     | 0.150748 | 14 | -5.240914217 | 0.029915 | 0.9991 |
| ODZ1      | 0.152574 | 58 | -10.0921408  | 0.123932 | 0.9991 |
| CDH20     | 0.152943 | 13 | -5.028797416 | 0.027778 | 0.9991 |
| PLD2      | 0.153036 | 19 | -6.037940614 | 0.040598 | 0.9991 |
| SYNE2     | 0.153209 | 88 | -11.94918596 | 0.188034 | 0.9991 |
| MYLK2     | 0.153358 | 8  | -3.962521887 | 0.017094 | 0.9991 |
| ABCC2     | 0.1538   | 36 | -8.137186799 | 0.076923 | 0.9991 |
| PAXIP1    | 0.153802 | 16 | -5.548917675 | 0.034188 | 0.9991 |
| ADAM33    | 0.15384  | 15 | -5.378168985 | 0.032051 | 0.9991 |

|                                  |          |    |              |          |        |
|----------------------------------|----------|----|--------------|----------|--------|
| CASP9                            | 0.155354 | 5  | 3.127667811  | 0.010684 | 0.9991 |
| MUTYH                            | 0.155799 | 16 | -5.522125239 | 0.034188 | 0.9991 |
| STK36                            | 0.158722 | 21 | -6.247152423 | 0.044872 | 0.9991 |
| PRKCA                            | 0.163889 | 7  | -3.617958001 | 0.014957 | 0.9991 |
| SIK1                             | 0.164466 | 17 | -5.569068073 | 0.036325 | 0.9991 |
| LATS2                            | 0.164612 | 25 | -6.690996254 | 0.053419 | 0.9991 |
| FKTN                             | 0.165186 | 5  | -3.054953137 | 0.010684 | 0.9991 |
| TBCK                             | 0.166571 | 11 | -4.487068861 | 0.023504 | 0.9991 |
| PAX6                             | 0.167307 | 9  | -4.060531032 | 0.019231 | 0.9991 |
| SLC17A5                          | 0.167516 | 11 | -4.477085703 | 0.023504 | 0.9991 |
| STAT5B                           | 0.16761  | 7  | -3.586281129 | 0.014957 | 0.9991 |
| MYBL2                            | 0.169768 | 10 | -4.250863432 | 0.021368 | 0.9991 |
| ANO1                             | 0.170088 | 15 | -5.173849107 | 0.032051 | 0.9991 |
| BAI3                             | 0.171149 | 35 | -7.707610203 | 0.074786 | 0.9991 |
| RFX2                             | 0.171539 | 28 | -6.943068538 | 0.059829 | 0.9991 |
| SMAD4                            | 0.172008 | 55 | -9.417308711 | 0.117521 | 0.9991 |
| CYP2C8                           | 0.173132 | 5  | -2.998535515 | 0.010684 | 0.9991 |
| NLRP5                            | 0.173622 | 38 | -7.957283014 | 0.081197 | 0.9991 |
| MAP3K6                           | 0.175686 | 14 | -4.939139305 | 0.029915 | 0.9991 |
| UGT1A1_UGT1A10_UGT1A3_UGT1A4_UGT | 0.175841 | 5  | -2.979745649 | 0.010684 | 0.9991 |
| ADAMTS18                         | 0.175915 | 43 | -8.370624515 | 0.09188  | 0.9991 |
| PTPRC                            | 0.177008 | 27 | -6.739578056 | 0.057692 | 0.9991 |
| IKBIP                            | 0.177599 | 11 | -4.373142142 | 0.023504 | 0.9991 |
| EXOC2                            | 0.17779  | 15 | -5.082097294 | 0.032051 | 0.9991 |
| USP7                             | 0.178238 | 18 | -5.542959993 | 0.038462 | 0.9991 |
| PRRC2C                           | 0.178482 | 32 | -7.270650019 | 0.068376 | 0.9991 |
| HERC6                            | 0.178576 | 16 | -5.233475648 | 0.034188 | 0.9991 |
| MSH2                             | 0.178998 | 15 | -5.067972382 | 0.032051 | 0.9991 |
| CD22                             | 0.179691 | 20 | -5.810344746 | 0.042735 | 0.9991 |
| MAP2K4                           | 0.181804 | 11 | -4.331095442 | 0.023504 | 0.9991 |
| PHF14                            | 0.1824   | 14 | -4.863432728 | 0.029915 | 0.9991 |
| CLSPN                            | 0.182626 | 28 | -6.767551927 | 0.059829 | 0.9991 |
| PLAT                             | 0.182694 | 14 | -4.860165733 | 0.029915 | 0.9991 |
| GPR81                            | 0.183891 | 10 | -4.114384665 | 0.021368 | 0.9991 |
| JUNB                             | 0.183979 | 11 | -4.309626389 | 0.023504 | 0.9991 |
| ADAM29                           | 0.18459  | 29 | -6.848752327 | 0.061966 | 0.9991 |
| KTN1                             | 0.187996 | 19 | -5.563155526 | 0.040598 | 0.9991 |
| LGR5                             | 0.190098 | 22 | -5.93794259  | 0.047009 | 0.9991 |
| ADAMTS20                         | 0.190352 | 46 | -8.347254328 | 0.098291 | 0.9991 |
| NROB1                            | 0.190368 | 12 | -4.431655111 | 0.025641 | 0.9991 |
| SMO                              | 0.19038  | 14 | -4.776093373 | 0.029915 | 0.9991 |
| ARHGAP26                         | 0.19123  | 10 | -4.046512998 | 0.021368 | 0.9991 |
| CLU                              | 0.193876 | 7  | -3.376482831 | 0.014957 | 0.9991 |
| NUMB                             | 0.195005 | 9  | -3.810604211 | 0.019231 | 0.9991 |
| WIF1                             | 0.195109 | 7  | -3.367165514 | 0.014957 | 0.9991 |

|          |          |    |              |          |        |
|----------|----------|----|--------------|----------|--------|
| PPARGC1A | 0.19591  | 6  | -3.115179815 | 0.012821 | 0.9991 |
| TICAM1   | 0.200194 | 7  | -3.329184494 | 0.014957 | 0.9991 |
| DYRK2    | 0.200998 | 10 | -3.95909546  | 0.021368 | 0.9991 |
| AXIN1    | 0.201459 | 13 | -4.494652862 | 0.027778 | 0.9991 |
| BCL9     | 0.201625 | 26 | 6.262622396  | 0.055556 | 0.9991 |
| ADAM17   | 0.202963 | 9  | -3.743681922 | 0.019231 | 0.9991 |
| NKX2_1   | 0.202978 | 5  | -2.802412222 | 0.010684 | 0.9991 |
| ENPP2    | 0.203327 | 14 | -4.639949535 | 0.029915 | 0.9991 |
| CDK8     | 0.20405  | 6  | -3.059306858 | 0.012821 | 0.9991 |
| MAPK8    | 0.204283 | 5  | -2.79433649  | 0.010684 | 0.9991 |
| TMEM132B | 0.205699 | 25 | -6.092801707 | 0.053419 | 0.9991 |
| PTPN13   | 0.205823 | 46 | -8.06420297  | 0.098291 | 0.9991 |
| ATG16L2  | 0.206456 | 11 | -4.09802938  | 0.023504 | 0.9991 |
| ADAMTSL3 | 0.208627 | 49 | -8.242342899 | 0.104701 | 0.9991 |
| GPR124   | 0.20939  | 26 | -6.156249842 | 0.055556 | 0.9991 |
| BLM      | 0.210692 | 28 | -6.355996253 | 0.059829 | 0.9991 |
| CCDC82   | 0.211221 | 9  | 3.676227504  | 0.019231 | 0.9991 |
| TFE3     | 0.211425 | 8  | -3.468202601 | 0.017094 | 0.9991 |
| STK32C   | 0.212193 | 8  | -3.462374979 | 0.017094 | 0.9991 |
| CSDA     | 0.213182 | 6  | -2.9985301   | 0.012821 | 0.9991 |
| NOS2     | 0.214153 | 19 | -5.249175584 | 0.040598 | 0.9991 |
| XRCC2    | 0.215153 | 9  | -3.644774095 | 0.019231 | 0.9991 |
| AURKC    | 0.215295 | 10 | -3.836557091 | 0.021368 | 0.9991 |
| CD4      | 0.217207 | 9  | -3.628517033 | 0.019231 | 0.9991 |
| AXL      | 0.217273 | 23 | -5.710608971 | 0.049145 | 0.9991 |
| WNT4     | 0.2175   | 11 | -4.000170939 | 0.023504 | 0.9991 |
| TOPBP1   | 0.218571 | 23 | -5.694524007 | 0.049145 | 0.9991 |
| PLAU     | 0.218658 | 12 | -4.162986917 | 0.025641 | 0.9991 |
| PIK3CB   | 0.218823 | 12 | -4.161490979 | 0.025641 | 0.9991 |
| SIX4     | 0.219226 | 8  | -3.409731066 | 0.017094 | 0.9991 |
| HUS1     | 0.220396 | 6  | 2.951829122  | 0.012821 | 0.9991 |
| GSK3A    | 0.220673 | 5  | -2.695932703 | 0.010684 | 0.9991 |
| VEPH1    | 0.220772 | 16 | -4.763981539 | 0.034188 | 0.9991 |
| CDS1     | 0.221105 | 10 | -3.788441352 | 0.021368 | 0.9991 |
| PHLPP2   | 0.222911 | 16 | -4.741988671 | 0.034188 | 0.9991 |
| MYO1B    | 0.223125 | 14 | -4.443466198 | 0.029915 | 0.9991 |
| P2RY10   | 0.223927 | 9  | -3.576062072 | 0.019231 | 0.9991 |
| MSN      | 0.225308 | 10 | -3.754190723 | 0.021368 | 0.9991 |
| JAG1     | 0.225347 | 22 | -5.494473658 | 0.047009 | 0.9991 |
| MAP2K7   | 0.227653 | 16 | -4.693747232 | 0.034188 | 0.9991 |
| KCNH8    | 0.2279   | 19 | -5.095186492 | 0.040598 | 0.9991 |
| ITGAV    | 0.228092 | 11 | -3.909623828 | 0.023504 | 0.9991 |
| IL21R    | 0.228949 | 11 | -3.902433923 | 0.023504 | 0.9991 |
| DDX1     | 0.229079 | 8  | -3.337980684 | 0.017094 | 0.9991 |
| SPEG     | 0.231612 | 50 | -7.911748491 | 0.106838 | 0.9991 |
| PTPN22   | 0.232047 | 13 | -4.205060074 | 0.027778 | 0.9991 |

|                 |          |    |              |          |        |
|-----------------|----------|----|--------------|----------|--------|
| FOXO3           | 0.232263 | 7  | -3.104516927 | 0.014957 | 0.9991 |
| ILK             | 0.233171 | 12 | -4.034810338 | 0.025641 | 0.9991 |
| CBLC            | 0.234223 | 6  | -2.865297603 | 0.012821 | 0.9991 |
| HGF             | 0.234825 | 16 | -4.622137977 | 0.034188 | 0.9991 |
| EPHB1           | 0.235244 | 22 | -5.379030219 | 0.047009 | 0.9991 |
| MAPK8IP2        | 0.236172 | 15 | -4.467451891 | 0.032051 | 0.9991 |
| KIAA1409        | 0.238148 | 44 | -7.371305041 | 0.094017 | 0.9991 |
| XRCC1           | 0.23974  | 6  | -2.831779716 | 0.012821 | 0.9991 |
| USP33           | 0.239977 | 9  | 3.455189728  | 0.019231 | 0.9991 |
| OR8G1           | 0.246248 | 8  | -3.218016669 | 0.017094 | 0.9991 |
| PKMYT1          | 0.246885 | 8  | -3.213680548 | 0.017094 | 0.9991 |
| DGKG            | 0.247663 | 21 | -5.124221916 | 0.044872 | 0.9991 |
| MKNK2           | 0.248431 | 6  | -2.780070512 | 0.012821 | 0.9991 |
| BIVM_BIVM_ERCC5 | 0.248826 | 7  | -2.99706543  | 0.014957 | 0.9991 |
| MRE11A          | 0.250098 | 13 | -4.046761645 | 0.027778 | 0.9991 |
| ZAP70           | 0.251497 | 17 | -4.593677901 | 0.036325 | 0.9991 |
| CTDP1           | 0.25176  | 14 | -4.180212307 | 0.029915 | 0.9991 |
| NOTCH2          | 0.253424 | 24 | -5.393619874 | 0.051282 | 0.9991 |
| TAB3            | 0.25585  | 7  | -2.953011919 | 0.014957 | 0.9991 |
| FBXL6           | 0.255909 | 11 | -3.685241086 | 0.023504 | 0.9991 |
| PAK7            | 0.257809 | 15 | -4.267486422 | 0.032051 | 0.9991 |
| AZI2            | 0.257874 | 5  | -2.490539135 | 0.010684 | 0.9991 |
| PKM2            | 0.262611 | 5  | -2.465907055 | 0.010684 | 0.9991 |
| GUCY2F          | 0.263646 | 28 | -5.676296784 | 0.059829 | 0.9991 |
| TRIM28          | 0.264578 | 6  | -2.687253235 | 0.012821 | 0.9991 |
| STIL            | 0.266904 | 14 | -4.04940024  | 0.029915 | 0.9991 |
| PTCH2           | 0.268257 | 23 | -5.124065157 | 0.049145 | 0.9991 |
| TLN1            | 0.269594 | 26 | -5.4144672   | 0.055556 | 0.9991 |
| SLC2A1          | 0.270283 | 8  | -3.059551025 | 0.017094 | 0.9991 |
| ETS2            | 0.270389 | 10 | -3.412478682 | 0.021368 | 0.9991 |
| MSH6            | 0.272737 | 27 | -5.47534203  | 0.057692 | 0.9991 |
| CD248           | 0.272937 | 7  | -2.8492372   | 0.014957 | 0.9991 |
| CDKN1A          | 0.275441 | 5  | -2.400701815 | 0.010684 | 0.9991 |
| RALGAPA1        | 0.278064 | 13 | -3.816524472 | 0.027778 | 0.9991 |
| GAB2            | 0.278549 | 12 | -3.667122309 | 0.025641 | 0.9991 |
| SPO11           | 0.279248 | 7  | 2.812035454  | 0.014957 | 0.9991 |
| MAMDC4          | 0.279969 | 35 | -6.084828718 | 0.074786 | 0.9991 |
| GLP1R           | 0.280339 | 5  | 2.376354079  | 0.010684 | 0.9991 |
| GLI1            | 0.283347 | 17 | -4.297680916 | 0.036325 | 0.9991 |
| BRIP1           | 0.283841 | 12 | -3.627011313 | 0.025641 | 0.9991 |
| HIP1            | 0.284722 | 15 | -4.03436977  | 0.032051 | 0.9991 |
| CDC7            | 0.289734 | 11 | -3.434150706 | 0.023504 | 0.9991 |
| ARAF            | 0.292532 | 9  | 3.095092721  | 0.019231 | 0.9991 |
| SLC4A4          | 0.294691 | 32 | -5.662677781 | 0.068376 | 0.9991 |
| CYB5D2          | 0.295124 | 5  | -2.304571594 | 0.010684 | 0.9991 |
| PKN3            | 0.296733 | 28 | -5.29874626  | 0.059829 | 0.9991 |

|          |          |    |              |          |        |
|----------|----------|----|--------------|----------|--------|
| DNTT     | 0.299737 | 9  | 3.049262323  | 0.019231 | 0.9991 |
| WNT10B   | 0.300948 | 13 | -3.639628945 | 0.027778 | 0.9991 |
| GOLIM4   | 0.302204 | 10 | -3.194361406 | 0.021368 | 0.9991 |
| GRM8     | 0.302995 | 22 | -4.667877042 | 0.047009 | 0.9991 |
| RBL2     | 0.303786 | 16 | -4.000913224 | 0.034188 | 0.9991 |
| PRKCG    | 0.304113 | 13 | -3.615878331 | 0.027778 | 0.9991 |
| TWF2     | 0.304689 | 6  | -2.472385334 | 0.012821 | 0.9991 |
| BIRC7    | 0.312263 | 7  | 2.626147912  | 0.014957 | 0.9991 |
| IGF1     | 0.313925 | 11 | -3.266501412 | 0.023504 | 0.9991 |
| ORM1     | 0.317911 | 6  | -2.405731889 | 0.012821 | 0.9991 |
| PCM1     | 0.321713 | 39 | -5.86407474  | 0.083333 | 0.9991 |
| SFRP1    | 0.322519 | 5  | -2.177663245 | 0.010684 | 0.9991 |
| MYBL1    | 0.322778 | 8  | -2.744146008 | 0.017094 | 0.9991 |
| SENP6    | 0.324397 | 13 | -3.467427981 | 0.027778 | 0.9991 |
| EGF      | 0.328706 | 18 | -4.021648079 | 0.038462 | 0.9991 |
| TMEM161A | 0.33233  | 14 | -3.535887863 | 0.029915 | 0.9991 |
| IRAK4    | 0.332393 | 7  | 2.519128087  | 0.014957 | 0.9991 |
| ERCC3    | 0.332554 | 9  | -2.849266347 | 0.019231 | 0.9991 |
| PSEN2    | 0.334694 | 6  | -2.323698447 | 0.012821 | 0.9991 |
| STK33    | 0.335547 | 9  | -2.831682676 | 0.019231 | 0.9991 |
| ELK3     | 0.3375   | 14 | -3.498265905 | 0.029915 | 0.9991 |
| MCPH1    | 0.337691 | 22 | -4.34478224  | 0.047009 | 0.9991 |
| MS4A1    | 0.339533 | 5  | -2.102370295 | 0.010684 | 0.9991 |
| ROR1     | 0.348422 | 14 | -3.419992195 | 0.029915 | 0.9991 |
| MTHFR    | 0.350272 | 13 | -3.286570515 | 0.027778 | 0.9991 |
| ERC1     | 0.352483 | 15 | -3.506442673 | 0.032051 | 0.9991 |
| NEK10    | 0.35349  | 7  | -2.411364513 | 0.014957 | 0.9991 |
| EGFL6    | 0.359226 | 5  | 2.018176186  | 0.010684 | 0.9991 |
| SLC22A2  | 0.35988  | 8  | -2.541071951 | 0.017094 | 0.9991 |
| PDIA4    | 0.359887 | 15 | -3.452877031 | 0.032051 | 0.9991 |
| MSH4     | 0.360512 | 13 | -3.217352238 | 0.027778 | 0.9991 |
| SOCS1    | 0.363734 | 8  | 2.520754421  | 0.017094 | 0.9991 |
| PAG1     | 0.363743 | 9  | -2.670705433 | 0.019231 | 0.9991 |
| ASXL1    | 0.365518 | 28 | -4.595111496 | 0.059829 | 0.9991 |
| LARGE    | 0.368105 | 18 | -3.705861008 | 0.038462 | 0.9991 |
| ANAPC5   | 0.369245 | 15 | -3.386157363 | 0.032051 | 0.9991 |
| XRCC3    | 0.36949  | 5  | -1.975446887 | 0.010684 | 0.9991 |
| PRKACB   | 0.374487 | 5  | -1.954911878 | 0.010684 | 0.9991 |
| CCR3     | 0.374686 | 15 | -3.347846336 | 0.032051 | 0.9991 |
| GPC5     | 0.376783 | 14 | -3.223703219 | 0.029915 | 0.9991 |
| APEX1    | 0.379389 | 7  | -2.284491055 | 0.014957 | 0.9991 |
| TRIM36   | 0.37962  | 10 | -2.720271171 | 0.021368 | 0.9991 |
| GSK3B    | 0.380821 | 8  | -2.432252739 | 0.017094 | 0.9991 |
| ITSN2    | 0.385714 | 25 | -4.176274426 | 0.053419 | 0.9991 |
| CA12     | 0.386862 | 8  | -2.401550853 | 0.017094 | 0.9991 |
| NEK9     | 0.387903 | 11 | -2.800720231 | 0.023504 | 0.9991 |



|           |          |     |              |          |        |
|-----------|----------|-----|--------------|----------|--------|
| PDGFRB    | 0.389047 | 19  | -3.639722987 | 0.040598 | 0.9991 |
| APAF1     | 0.391481 | 20  | -3.71100183  | 0.042735 | 0.9991 |
| PDK3      | 0.392949 | 6   | -2.057725855 | 0.012821 | 0.9991 |
| PTPN5     | 0.393296 | 13  | -3.003655345 | 0.027778 | 0.9991 |
| TMPRSS2   | 0.395446 | 10  | -2.631056435 | 0.021368 | 0.9991 |
| CD8A      | 0.395495 | 8   | -2.358179832 | 0.017094 | 0.9991 |
| ADORA2A   | 0.395551 | 12  | -2.875239698 | 0.025641 | 0.9991 |
| CHRNA5    | 0.398064 | 8   | -2.345380864 | 0.017094 | 0.9991 |
| PRDM16    | 0.401165 | 32  | -4.536813914 | 0.068376 | 0.9991 |
| RRM2B     | 0.403143 | 12  | 2.829308321  | 0.025641 | 0.9991 |
| NLK       | 0.40473  | 9   | 2.450011772  | 0.019231 | 0.9991 |
| KRAS      | 0.405565 | 190 | -8.745165371 | 0.405983 | 0.9991 |
| HECW1     | 0.407093 | 39  | -4.905869334 | 0.083333 | 0.9991 |
| TGFB3     | 0.408304 | 10  | -2.560152084 | 0.021368 | 0.9991 |
| CCNE1     | 0.408768 | 9   | -2.429021054 | 0.019231 | 0.9991 |
| KDM6A     | 0.410631 | 14  | -3.001007735 | 0.029915 | 0.9991 |
| ADHFE1    | 0.411441 | 16  | -3.195602852 | 0.034188 | 0.9991 |
| KDR       | 0.411829 | 19  | -3.4678753   | 0.040598 | 0.9991 |
| FAM46A    | 0.415365 | 10  | -2.521785477 | 0.021368 | 0.9991 |
| RB1CC1    | 0.417956 | 11  | -2.627331701 | 0.023504 | 0.9991 |
| PAK1      | 0.419503 | 7   | -2.098048092 | 0.014957 | 0.9991 |
| ETS1      | 0.421038 | 12  | -2.723043176 | 0.025641 | 0.9991 |
| PIK3C3    | 0.421296 | 9   | -2.36465546  | 0.019231 | 0.9991 |
| VPS13B    | 0.421675 | 68  | -6.062763682 | 0.145299 | 0.9991 |
| NRAS      | 0.421798 | 15  | 3.029462394  | 0.032051 | 0.9991 |
| C10orf137 | 0.425825 | 11  | -2.58316258  | 0.023504 | 0.9991 |
| NEK11     | 0.425952 | 16  | 3.09747218   | 0.034188 | 0.9991 |
| SPEN      | 0.426255 | 44  | -4.971679769 | 0.094017 | 0.9991 |
| IGFBP5    | 0.426436 | 8   | -2.20723082  | 0.017094 | 0.9991 |
| NKD2      | 0.426705 | 14  | -2.899099178 | 0.029915 | 0.9991 |
| USP42     | 0.426922 | 24  | -3.752012955 | 0.051282 | 0.9991 |
| FANCF     | 0.427017 | 5   | -1.748449685 | 0.010684 | 0.9991 |
| ERCC4     | 0.427375 | 12  | -2.686051673 | 0.025641 | 0.9991 |
| NMUR2     | 0.429748 | 7   | -2.052148724 | 0.014957 | 0.9991 |
| KSR2      | 0.435092 | 17  | -3.126656231 | 0.036325 | 0.9991 |
| FLT4      | 0.435637 | 31  | -4.151192731 | 0.066239 | 0.9991 |
| CSF1R     | 0.438958 | 23  | -3.582192129 | 0.049145 | 0.9991 |
| MTMR3     | 0.439136 | 16  | -3.009989921 | 0.034188 | 0.9991 |
| IKZF1     | 0.440338 | 14  | -2.814408353 | 0.029915 | 0.9991 |
| BIRC3     | 0.441178 | 5   | -1.695400118 | 0.010684 | 0.9991 |
| IGFBP3    | 0.44152  | 5   | -1.694130798 | 0.010684 | 0.9991 |
| HEY2      | 0.44221  | 9   | -2.259659425 | 0.019231 | 0.9991 |
| PGR       | 0.448576 | 21  | -3.358944732 | 0.044872 | 0.9991 |
| PIK3R3    | 0.450269 | 7   | -1.962083554 | 0.014957 | 0.9991 |
| PARK2     | 0.451938 | 13  | -2.646632651 | 0.027778 | 0.9991 |
| REV1      | 0.452997 | 15  | -2.830044858 | 0.032051 | 0.9991 |

|                    |          |    |              |          |        |
|--------------------|----------|----|--------------|----------|--------|
| F2RL2              | 0.462161 | 7  | -1.910950739 | 0.014957 | 0.9991 |
| MELK               | 0.462749 | 9  | -2.159274332 | 0.019231 | 0.9991 |
| DBN1               | 0.464988 | 17 | 2.926961214  | 0.036325 | 0.9991 |
| PLD1               | 0.467517 | 16 | -2.826634219 | 0.034188 | 0.9991 |
| HSP90AA1           | 0.470594 | 11 | -2.340389124 | 0.023504 | 0.9991 |
| NBN                | 0.471278 | 8  | -1.999347309 | 0.017094 | 0.9991 |
| DTX1               | 0.471301 | 10 | -2.23035779  | 0.021368 | 0.9991 |
| SOS2               | 0.471596 | 12 | -2.436270799 | 0.025641 | 0.9991 |
| CD14               | 0.472384 | 9  | -2.113042889 | 0.019231 | 0.9991 |
| MMP2               | 0.474861 | 15 | -2.694901123 | 0.032051 | 0.9991 |
| EPHA7              | 0.47739  | 19 | -3.002328388 | 0.040598 | 0.9991 |
| BAK1               | 0.478532 | 6  | -1.706979749 | 0.012821 | 0.9991 |
| FOXO1              | 0.485323 | 14 | -2.545028055 | 0.029915 | 0.9991 |
| MOS                | 0.486206 | 16 | -2.709260351 | 0.034188 | 0.9991 |
| GEN1               | 0.486274 | 11 | -2.258435066 | 0.023504 | 0.9991 |
| RB1                | 0.48745  | 11 | -2.252346255 | 0.023504 | 0.9991 |
| FANCC              | 0.492102 | 6  | -1.654716688 | 0.012821 | 0.9991 |
| DDR2               | 0.492784 | 15 | -2.586647496 | 0.032051 | 0.9991 |
| AXIN2              | 0.493092 | 36 | -3.910446141 | 0.076923 | 0.9991 |
| PER1               | 0.493424 | 19 | -2.894009431 | 0.040598 | 0.9991 |
| ARHGEF12           | 0.493829 | 23 | -3.166914767 | 0.049145 | 0.9991 |
| FLT3               | 0.49729  | 28 | -3.446761927 | 0.059829 | 0.9991 |
| KIF16B             | 0.499475 | 27 | -3.371309611 | 0.057692 | 0.9991 |
| IKBKE              | 0.504343 | 5  | 1.469699326  | 0.010684 | 0.9991 |
| KAT2B              | 0.507071 | 10 | -2.054007286 | 0.021368 | 0.9991 |
| BMP2               | 0.509726 | 6  | -1.587985508 | 0.012821 | 0.9991 |
| PMS2               | 0.512982 | 9  | 1.923665151  | 0.019231 | 0.9991 |
| LIG3               | 0.514267 | 14 | -2.37885749  | 0.029915 | 0.9991 |
| XRCC5              | 0.514695 | 12 | -2.204992078 | 0.025641 | 0.9991 |
| MYB                | 0.517296 | 13 | 2.278347885  | 0.027778 | 0.9991 |
| HCRTR2             | 0.517687 | 12 | -2.18932284  | 0.025641 | 0.9991 |
| CBLB               | 0.518751 | 16 | 2.510511925  | 0.034188 | 0.9991 |
| CCNE2              | 0.519288 | 6  | -1.552284622 | 0.012821 | 0.9991 |
| GRM7               | 0.520899 | 25 | -3.090792703 | 0.053419 | 0.9991 |
| NFATC3             | 0.525682 | 16 | -2.469030536 | 0.034188 | 0.9991 |
| RFC1               | 0.529897 | 17 | -2.516373002 | 0.036325 | 0.9991 |
| CES3               | 0.530151 | 11 | 2.036333765  | 0.023504 | 0.9991 |
| MAS1L              | 0.530823 | 8  | -1.739434153 | 0.017094 | 0.9991 |
| POU1F1             | 0.531326 | 9  | -1.840688824 | 0.019231 | 0.9991 |
| CDH11              | 0.532223 | 28 | -3.171821835 | 0.059829 | 0.9991 |
| PARP2              | 0.532638 | 13 | 2.195534923  | 0.027778 | 0.9991 |
| TRAF5              | 0.536203 | 7  | -1.607589253 | 0.014957 | 0.9991 |
| ATG9B              | 0.536263 | 11 | -2.00615953  | 0.023504 | 0.9991 |
| FPGT_TNNI3K_TNNI3K | 0.539616 | 15 | -2.313256911 | 0.032051 | 0.9991 |
| MAS1               | 0.541892 | 8  | 1.692822126  | 0.017094 | 0.9991 |
| PRKAA1             | 0.542439 | 5  | 1.34083204   | 0.010684 | 0.9991 |

|          |          |    |              |          |        |
|----------|----------|----|--------------|----------|--------|
| PPM1D    | 0.542638 | 11 | -1.974873093 | 0.023504 | 0.9991 |
| TCF7L2   | 0.54345  | 45 | 3.835187826  | 0.096154 | 0.9991 |
| RPS6KA5  | 0.544659 | 12 | -2.050123162 | 0.025641 | 0.9991 |
| ZC3H12B  | 0.546592 | 9  | -1.772737747 | 0.019231 | 0.9991 |
| LDHB     | 0.547094 | 8  | -1.671078684 | 0.017094 | 0.9991 |
| PTEN     | 0.547991 | 16 | -2.337379746 | 0.034188 | 0.9991 |
| RIF1     | 0.54928  | 31 | -3.188758747 | 0.066239 | 0.9991 |
| IRS2     | 0.550217 | 11 | 1.93791601   | 0.023504 | 0.9991 |
| CCR5     | 0.551119 | 6  | 1.435802033  | 0.012821 | 0.9991 |
| TRAF2    | 0.551435 | 17 | -2.385971296 | 0.036325 | 0.9991 |
| PRKAG1   | 0.551566 | 5  | -1.310643969 | 0.010684 | 0.9991 |
| FURIN    | 0.553499 | 9  | -1.742306446 | 0.019231 | 0.9991 |
| RAP1GDS1 | 0.555231 | 8  | -1.63727396  | 0.017094 | 0.9991 |
| PFKFB3   | 0.556782 | 13 | -2.067618042 | 0.027778 | 0.9991 |
| CHRNA3   | 0.559421 | 9  | -1.71636006  | 0.019231 | 0.9991 |
| PTPN9    | 0.559478 | 6  | -1.40577102  | 0.012821 | 0.9991 |
| SLC6A2   | 0.564749 | 16 | -2.24023091  | 0.034188 | 0.9991 |
| FANCB    | 0.565027 | 16 | 2.238626005  | 0.034188 | 0.9991 |
| MPL      | 0.573627 | 6  | 1.355429964  | 0.012821 | 0.9991 |
| CHRN4    | 0.577615 | 10 | -1.724162453 | 0.021368 | 0.9991 |
| GAB3     | 0.577905 | 6  | -1.340325496 | 0.012821 | 0.9991 |
| NUAK1    | 0.578057 | 12 | -1.882408197 | 0.025641 | 0.9991 |
| IKZF3    | 0.583158 | 8  | 1.52303613   | 0.017094 | 0.9991 |
| FHIT     | 0.583171 | 7  | -1.426168603 | 0.014957 | 0.9991 |
| INHBA    | 0.58706  | 8  | -1.50728436  | 0.017094 | 0.9991 |
| CCDC63   | 0.588324 | 23 | 2.505216461  | 0.049145 | 0.9991 |
| ATG2B    | 0.588349 | 30 | -2.838371183 | 0.064103 | 0.9991 |
| PTPN14   | 0.588988 | 29 | -2.789062748 | 0.061966 | 0.9991 |
| STAT1    | 0.589579 | 5  | -1.187444481 | 0.010684 | 0.9991 |
| TGFB2    | 0.593544 | 7  | -1.387052692 | 0.014957 | 0.9991 |
| MYH1     | 0.593889 | 35 | -3.00306798  | 0.074786 | 0.9991 |
| MYCN     | 0.595212 | 8  | -1.474525524 | 0.017094 | 0.9991 |
| PFKFB4   | 0.597851 | 7  | -1.370903509 | 0.014957 | 0.9991 |
| E4F1     | 0.598199 | 14 | -1.922147126 | 0.029915 | 0.9991 |
| PCGF2    | 0.598311 | 9  | -1.549132765 | 0.019231 | 0.9991 |
| TPO      | 0.600927 | 23 | -2.420983348 | 0.049145 | 0.9991 |
| MARK1    | 0.601967 | 16 | -2.029247239 | 0.034188 | 0.9991 |
| CDKL2    | 0.60308  | 6  | -1.252477019 | 0.012821 | 0.9991 |
| MAP3K14  | 0.604789 | 14 | -1.887618473 | 0.029915 | 0.9991 |
| UPP1     | 0.605585 | 5  | -1.136685    | 0.010684 | 0.9991 |
| FANCG    | 0.607002 | 13 | -1.809807685 | 0.027778 | 0.9991 |
| HIF1A    | 0.60974  | 8  | 1.41664767   | 0.017094 | 0.9991 |
| PDGFB    | 0.610295 | 6  | -1.22760921  | 0.012821 | 0.9991 |
| HDAC1    | 0.610541 | 6  | -1.226764365 | 0.012821 | 0.9991 |
| GRK5     | 0.617416 | 10 | -1.54657855  | 0.021368 | 0.9991 |
| GSTP1    | 0.618835 | 9  | -1.462894657 | 0.019231 | 0.9991 |

|           |          |    |              |          |        |
|-----------|----------|----|--------------|----------|--------|
| NLRP8     | 0.621591 | 27 | 2.464129845  | 0.057692 | 0.9991 |
| CXorf30   | 0.623024 | 15 | -1.853824479 | 0.032051 | 0.9991 |
| MYC       | 0.623356 | 10 | -1.520520249 | 0.021368 | 0.9991 |
| PIK3C2A   | 0.629405 | 24 | -2.278989852 | 0.051282 | 0.9991 |
| SMC6      | 0.635915 | 8  | -1.313888491 | 0.017094 | 0.9991 |
| CDC42BPA  | 0.637954 | 24 | -2.222301713 | 0.051282 | 0.9991 |
| ATR       | 0.639034 | 22 | 2.12562927   | 0.047009 | 0.9991 |
| NEK8      | 0.642147 | 10 | -1.438780986 | 0.021368 | 0.9991 |
| SOX11     | 0.642933 | 15 | -1.748355646 | 0.032051 | 0.9991 |
| IKKBK     | 0.644948 | 10 | -1.426681548 | 0.021368 | 0.9991 |
| PRKCI     | 0.645709 | 5  | -1.011974158 | 0.010684 | 0.9991 |
| GAB1      | 0.648321 | 8  | 1.265813909  | 0.017094 | 0.9991 |
| TCF       | 0.648843 | 52 | -3.064095363 | 0.111111 | 0.9991 |
| TNKS2     | 0.648891 | 7  | -1.183288038 | 0.014957 | 0.9991 |
| DKK1      | 0.649792 | 8  | -1.260137729 | 0.017094 | 0.9991 |
| USP6NL    | 0.654733 | 10 | 1.384590294  | 0.021368 | 0.9991 |
| TNFRSF10A | 0.656149 | 11 | 1.444226267  | 0.023504 | 0.9991 |
| KNTC1     | 0.659357 | 43 | -2.726225495 | 0.09188  | 0.9991 |
| PPP2R1A   | 0.661626 | 12 | -1.481185479 | 0.025641 | 0.9991 |
| BIRC6     | 0.661944 | 55 | -3.014792718 | 0.117521 | 0.9991 |
| KSR1      | 0.665561 | 15 | -1.630111453 | 0.032051 | 0.9991 |
| PDGFA     | 0.665746 | 6  | 1.040552801  | 0.012821 | 0.9991 |
| HAPLN1    | 0.667973 | 8  | 1.190424853  | 0.017094 | 0.9991 |
| AKT3      | 0.66916  | 7  | -1.110511628 | 0.014957 | 0.9991 |
| RASSF1    | 0.672159 | 10 | 1.310253089  | 0.021368 | 0.9991 |
| NCAM1     | 0.673541 | 28 | -2.139337443 | 0.059829 | 0.9991 |
| PPARA     | 0.67406  | 9  | -1.23671024  | 0.019231 | 0.9991 |
| WT1       | 0.674994 | 11 | -1.360106393 | 0.023504 | 0.9991 |
| UMPS      | 0.685026 | 6  | -0.977010912 | 0.012821 | 0.9991 |
| DDX11     | 0.685121 | 12 | 1.372265568  | 0.025641 | 0.9991 |
| LTBP1     | 0.689648 | 29 | -2.061370575 | 0.061966 | 0.9991 |
| XBP1      | 0.690419 | 5  | -0.876718862 | 0.010684 | 0.9991 |
| SOX10     | 0.691771 | 5  | 0.87268326   | 0.010684 | 0.9991 |
| PTPN12    | 0.695066 | 9  | -1.152637087 | 0.019231 | 0.9991 |
| RASGRF1   | 0.695111 | 21 | -1.737239346 | 0.044872 | 0.9991 |
| TLR4      | 0.695489 | 10 | -1.21188563  | 0.021368 | 0.9991 |
| TMPRSS6   | 0.698172 | 19 | -1.63865024  | 0.040598 | 0.9991 |
| HLA_A     | 0.701054 | 84 | -3.154357228 | 0.179487 | 0.9991 |
| ADA       | 0.701788 | 9  | -1.12593313  | 0.019231 | 0.9991 |
| WNT2B     | 0.702666 | 13 | -1.343126293 | 0.027778 | 0.9991 |
| BMPR1B    | 0.702912 | 16 | -1.483855087 | 0.034188 | 0.9991 |
| DGKB      | 0.703549 | 12 | 1.287825047  | 0.025641 | 0.9991 |
| ECT2      | 0.704941 | 5  | -0.833516882 | 0.010684 | 0.9991 |
| RING1     | 0.709444 | 7  | -0.968355821 | 0.014957 | 0.9991 |
| EGFR      | 0.718524 | 18 | 1.484075822  | 0.038462 | 0.9991 |
| TGFB1     | 0.719849 | 10 | -1.110466809 | 0.021368 | 0.9991 |

|         |          |    |              |          |        |
|---------|----------|----|--------------|----------|--------|
| MUC1    | 0.720864 | 7  | -0.928596426 | 0.014957 | 0.9991 |
| PTPRT   | 0.722373 | 41 | -2.150692349 | 0.087607 | 0.9991 |
| PAK3    | 0.722999 | 7  | -0.921188103 | 0.014957 | 0.9991 |
| CDKN1B  | 0.724479 | 10 | 1.091331635  | 0.021368 | 0.9991 |
| RAF1    | 0.725186 | 8  | 0.975629045  | 0.017094 | 0.9991 |
| FER     | 0.725411 | 9  | 1.032802805  | 0.019231 | 0.9991 |
| CCKBR   | 0.725659 | 13 | 1.234688898  | 0.027778 | 0.9991 |
| BMP4    | 0.736456 | 6  | 0.810655575  | 0.012821 | 0.9991 |
| RIPK1   | 0.736786 | 11 | -1.090255723 | 0.023504 | 0.9991 |
| TRAF7   | 0.741383 | 6  | -0.794931849 | 0.012821 | 0.9991 |
| GUCY1A2 | 0.742105 | 23 | -1.523063186 | 0.049145 | 0.9991 |
| JAK3    | 0.745291 | 33 | 1.780657548  | 0.070513 | 0.9991 |
| TMEFF2  | 0.748484 | 6  | -0.77233022  | 0.012821 | 0.9991 |
| PLAG1   | 0.766667 | 7  | -0.771189436 | 0.014957 | 0.9991 |
| CTNND2  | 0.768335 | 32 | -1.591738697 | 0.068376 | 0.9991 |
| ORAI1   | 0.768696 | 6  | -0.708360315 | 0.012821 | 0.9991 |
| SGK494  | 0.770918 | 9  | 0.8561911    | 0.019231 | 0.9991 |
| LRRN3   | 0.772994 | 10 | 0.893120006  | 0.021368 | 0.9991 |
| RYK     | 0.7764   | 7  | 0.738122527  | 0.014957 | 0.9991 |
| BAX     | 0.784935 | 8  | 0.757368844  | 0.017094 | 0.9991 |
| SMYD2   | 0.787383 | 8  | -0.748535836 | 0.017094 | 0.9991 |
| EPHA4   | 0.794026 | 15 | 0.984620511  | 0.032051 | 0.9991 |
| NPY2R   | 0.799616 | 7  | 0.65971541   | 0.014957 | 0.9991 |
| PTK2    | 0.800613 | 10 | 0.781944824  | 0.021368 | 0.9991 |
| PHLPP1  | 0.80075  | 13 | -0.888008076 | 0.027778 | 0.9991 |
| MAN1B1  | 0.80473  | 15 | 0.932367499  | 0.032051 | 0.9991 |
| RFC5    | 0.805855 | 5  | 0.541011596  | 0.010684 | 0.9991 |
| MSH3    | 0.807802 | 17 | -0.974490052 | 0.036325 | 0.9991 |
| INPP5A  | 0.821918 | 7  | 0.584956263  | 0.014957 | 0.9991 |
| PRKCD   | 0.834241 | 14 | 0.763271729  | 0.029915 | 0.9991 |
| CBL     | 0.836751 | 13 | -0.725007284 | 0.027778 | 0.9991 |
| ALOX12B | 0.838192 | 7  | -0.530712857 | 0.014957 | 0.9991 |
| MMP9    | 0.841029 | 22 | -0.908971676 | 0.047009 | 0.9991 |
| SIRT1   | 0.842772 | 5  | -0.436610401 | 0.010684 | 0.9991 |
| TANK    | 0.845899 | 9  | -0.57149071  | 0.019231 | 0.9991 |
| IGFBP1  | 0.849752 | 7  | -0.492320539 | 0.014957 | 0.9991 |
| LEF1    | 0.853799 | 6  | 0.443863933  | 0.012821 | 0.9991 |
| SPOP    | 0.853813 | 5  | -0.405588518 | 0.010684 | 0.9991 |
| CSNK1G2 | 0.857067 | 8  | -0.499860808 | 0.017094 | 0.9991 |
| E2F1    | 0.857394 | 6  | 0.43282893   | 0.012821 | 0.9991 |
| HES1    | 0.868856 | 5  | -0.363449524 | 0.010684 | 0.9991 |
| CLTC    | 0.879505 | 9  | 0.445764918  | 0.019231 | 0.9991 |
| PTPN3   | 0.893259 | 17 | -0.537519461 | 0.036325 | 0.9991 |
| BCL3    | 0.894624 | 5  | -0.291563805 | 0.010684 | 0.9991 |
| INSR    | 0.896911 | 17 | 0.519024873  | 0.036325 | 0.9991 |
| CYP2C19 | 0.903002 | 9  | -0.3583561   | 0.019231 | 0.9991 |

|          |          |    |              |          |        |
|----------|----------|----|--------------|----------|--------|
| PDZRN4   | 0.903357 | 25 | 0.584597515  | 0.053419 | 0.9991 |
| PLAGL1   | 0.904429 | 6  | 0.289211883  | 0.012821 | 0.9991 |
| ATG4D    | 0.905268 | 13 | -0.418742742 | 0.027778 | 0.9991 |
| RELB     | 0.906044 | 8  | 0.327571029  | 0.017094 | 0.9991 |
| USP54    | 0.908283 | 23 | -0.533219197 | 0.049145 | 0.9991 |
| ETV6     | 0.910573 | 8  | -0.311713604 | 0.017094 | 0.9991 |
| FOXO2    | 0.911565 | 5  | 0.244480016  | 0.010684 | 0.9991 |
| PARP4    | 0.912851 | 35 | -0.616388323 | 0.074786 | 0.9991 |
| RICTOR   | 0.916964 | 19 | 0.440557256  | 0.040598 | 0.9991 |
| TLR2     | 0.917551 | 13 | 0.364239527  | 0.027778 | 0.9991 |
| LRRC10   | 0.917821 | 5  | -0.227121202 | 0.010684 | 0.9991 |
| NQO1     | 0.921543 | 5  | 0.21679954   | 0.010684 | 0.9991 |
| BAZ1A    | 0.924455 | 13 | -0.333643777 | 0.027778 | 0.9991 |
| CALCR    | 0.927775 | 16 | 0.352663902  | 0.034188 | 0.9991 |
| FCGR3A   | 0.929468 | 14 | 0.322845001  | 0.029915 | 0.9991 |
| MTM1     | 0.930265 | 6  | 0.210790647  | 0.012821 | 0.9991 |
| PTPRJ    | 0.932798 | 24 | -0.398237857 | 0.051282 | 0.9991 |
| RASA1    | 0.935892 | 15 | 0.303336648  | 0.032051 | 0.9991 |
| ARHGAP29 | 0.938549 | 6  | -0.185696938 | 0.012821 | 0.9991 |
| CDC73    | 0.944841 | 8  | 0.192016748  | 0.017094 | 0.9991 |
| COL14A1  | 0.945734 | 31 | -0.362440576 | 0.066239 | 0.9991 |
| CYP2D6   | 0.946101 | 16 | -0.263021353 | 0.034188 | 0.9991 |
| CCNA1    | 0.948151 | 8  | 0.180476139  | 0.017094 | 0.9991 |
| USP5     | 0.948923 | 6  | 0.154299771  | 0.012821 | 0.9991 |
| FH       | 0.949422 | 8  | 0.176046021  | 0.017094 | 0.9991 |
| CX3CR1   | 0.950092 | 11 | -0.203030074 | 0.023504 | 0.9991 |
| SRSF6    | 0.961473 | 6  | 0.116353401  | 0.012821 | 0.9991 |
| TNK2     | 0.962094 | 14 | 0.173347288  | 0.029915 | 0.9991 |
| MAPK7    | 0.964421 | 10 | -0.138109527 | 0.021368 | 0.9991 |
| TAL1     | 0.965387 | 7  | -0.112778126 | 0.014957 | 0.9991 |
| IRAK3    | 0.968075 | 12 | 0.135445177  | 0.025641 | 0.9991 |
| NRG2     | 0.969328 | 10 | -0.119051594 | 0.021368 | 0.9991 |
| SHC1     | 0.972644 | 10 | 0.106175739  | 0.021368 | 0.9991 |
| MAGI2    | 0.974348 | 34 | 0.178702054  | 0.07265  | 0.9991 |
| LYN      | 0.980415 | 7  | 0.063799737  | 0.014957 | 0.9991 |
| TRIM47   | 0.982555 | 11 | 0.070926461  | 0.023504 | 0.9991 |
| ERBB2    | 0.995426 | 28 | 0.029108518  | 0.059829 | 0.9991 |
| FGFR3    | 0.9991   | 16 | -0.004387565 | 0.034188 | 0.9991 |

**Supplementary Table S12. Mutation ranking of Moffitt 407 MSS CRCs by the cetuximab sensitivity score**

**Note:** APC — APC truncating mutation; BRAF — BRAF(V600E). The mutated genes were listed according to adjusted p values that were calculated using the Hochberg and Benjamini method (11).

| gene    | p_value  | N_mutation | SumOfScores  | PCT      | Adjusted_p  |
|---------|----------|------------|--------------|----------|-------------|
| TP53    | 4.64E-22 | 261        | 92.35618721  | 0.641278 | 4.08706E-19 |
| APC     | 8.55E-12 | 296        | 60.65144013  | 0.727273 | 7.5234E-09  |
| BRAF    | 0.000709 | 18         | -13.88261987 | 0.044226 | 0.622700297 |
| KRAS    | 0.001858 | 177        | -30.76529221 | 0.434889 | 0.998439386 |
| SMAD3   | 0.00204  | 14         | -11.20981994 | 0.034398 | 0.998439386 |
| BARD1   | 0.002188 | 7          | -7.942689556 | 0.017199 | 0.998439386 |
| CTNNB1  | 0.003312 | 13         | -10.29971874 | 0.031941 | 0.998439386 |
| BRCA1   | 0.005571 | 25         | -13.27313668 | 0.061425 | 0.998439386 |
| IDH1    | 0.006636 | 5          | -5.963150252 | 0.012285 | 0.998439386 |
| RAD18   | 0.006847 | 6          | -6.49927295  | 0.014742 | 0.998439386 |
| SMAD2   | 0.006852 | 12         | -9.121449253 | 0.029484 | 0.998439386 |
| TLR7    | 0.011293 | 5          | -5.565343911 | 0.012285 | 0.998439386 |
| HECW1   | 0.012886 | 24         | 11.68261576  | 0.058968 | 0.998439386 |
| TRIB3   | 0.013672 | 8          | -6.825915453 | 0.019656 | 0.998439386 |
| NRP2    | 0.016995 | 15         | -8.967723787 | 0.036855 | 0.998439386 |
| TAF15   | 0.02442  | 5          | -4.943597175 | 0.012285 | 0.998439386 |
| GRM1    | 0.02554  | 18         | -9.155877612 | 0.044226 | 0.998439386 |
| AFF4    | 0.026074 | 7          | -5.769056663 | 0.017199 | 0.998439386 |
| FLT4    | 0.027436 | 18         | 9.041583062  | 0.044226 | 0.998439386 |
| EGFR    | 0.0279   | 11         | 7.110228904  | 0.027027 | 0.998439386 |
| RRM2B   | 0.028647 | 8          | 6.057809533  | 0.019656 | 0.998439386 |
| ULK2    | 0.030294 | 10         | -6.68765777  | 0.02457  | 0.998439386 |
| BIRC6   | 0.032138 | 37         | 12.28390347  | 0.090909 | 0.998439386 |
| TSPAN31 | 0.032338 | 5          | 4.701410007  | 0.012285 | 0.998439386 |
| CLTC    | 0.03246  | 5          | 4.698111899  | 0.012285 | 0.998439386 |
| NIM1    | 0.03741  | 8          | -5.76147621  | 0.019656 | 0.998439386 |
| CDH1    | 0.040885 | 12         | -6.897500195 | 0.029484 | 0.998439386 |
| ICK     | 0.044216 | 6          | -4.835687129 | 0.014742 | 0.998439386 |
| PKN3    | 0.044288 | 17         | 8.024549362  | 0.041769 | 0.998439386 |
| CCKBR   | 0.04468  | 8          | 5.557715523  | 0.019656 | 0.998439386 |
| TGFBR1  | 0.045719 | 7          | -5.180187235 | 0.017199 | 0.998439386 |
| USP9X   | 0.048256 | 11         | -6.387179447 | 0.027027 | 0.998439386 |
| FSCB    | 0.048801 | 14         | -7.161010609 | 0.034398 | 0.998439386 |
| STK11   | 0.051034 | 5          | -4.286209611 | 0.012285 | 0.998439386 |
| LATS1   | 0.05192  | 8          | -5.380930938 | 0.019656 | 0.998439386 |
| ROCK1   | 0.052334 | 8          | -5.37145599  | 0.019656 | 0.998439386 |
| DNTT    | 0.05385  | 6          | 4.633816496  | 0.014742 | 0.998439386 |
| LRP6    | 0.055435 | 15         | -7.196722861 | 0.036855 | 0.998439386 |
| EEF2K   | 0.056198 | 5          | -4.194615691 | 0.012285 | 0.998439386 |
| PLCB1   | 0.056837 | 11         | -6.159047137 | 0.027027 | 0.998439386 |

|         |          |    |              |          |             |
|---------|----------|----|--------------|----------|-------------|
| PRKCD   | 0.058169 | 8  | 5.244250178  | 0.019656 | 0.998439386 |
| XIAP    | 0.058739 | 8  | -5.2324091   | 0.019656 | 0.998439386 |
| PFKFB1  | 0.062574 | 8  | -5.155073717 | 0.019656 | 0.998439386 |
| THBS1   | 0.063498 | 8  | -5.137025128 | 0.019656 | 0.998439386 |
| FANCE   | 0.064185 | 8  | -5.123751252 | 0.019656 | 0.998439386 |
| AKAP6   | 0.06502  | 25 | -8.834885842 | 0.061425 | 0.998439386 |
| ROR2    | 0.067431 | 14 | -6.646598098 | 0.034398 | 0.998439386 |
| USP33   | 0.06787  | 7  | 4.733956841  | 0.017199 | 0.998439386 |
| GOLIM4  | 0.068147 | 10 | -5.631233547 | 0.02457  | 0.998439386 |
| CX3CR1  | 0.068166 | 7  | 4.728867498  | 0.017199 | 0.998439386 |
| CELSR1  | 0.06825  | 46 | -11.51271666 | 0.113022 | 0.998439386 |
| MAG     | 0.070921 | 12 | -6.092259558 | 0.029484 | 0.998439386 |
| BCL9    | 0.071699 | 20 | 7.763641936  | 0.04914  | 0.998439386 |
| RAD50   | 0.073187 | 10 | -5.531292185 | 0.02457  | 0.998439386 |
| ACVR2A  | 0.073586 | 10 | -5.523615717 | 0.02457  | 0.998439386 |
| ERBB3   | 0.077019 | 22 | -7.973706883 | 0.054054 | 0.998439386 |
| TET1    | 0.079925 | 5  | 3.846708464  | 0.012285 | 0.998439386 |
| RHOBTB2 | 0.080112 | 13 | -6.136799063 | 0.031941 | 0.998439386 |
| CTNND2  | 0.080687 | 19 | 7.348332036  | 0.046683 | 0.998439386 |
| ALPK3   | 0.081093 | 23 | -8.032397434 | 0.056511 | 0.998439386 |
| RIF1    | 0.081813 | 21 | 7.677013846  | 0.051597 | 0.998439386 |
| PRKCH   | 0.082756 | 6  | -4.169665231 | 0.014742 | 0.998439386 |
| MYBL2   | 0.084052 | 9  | -5.066313425 | 0.022113 | 0.998439386 |
| SPEN    | 0.08537  | 28 | 8.683388602  | 0.068796 | 0.998439386 |
| USP24   | 0.085598 | 8  | -4.758888092 | 0.019656 | 0.998439386 |
| ANKRD32 | 0.086226 | 5  | -3.768785732 | 0.012285 | 0.998439386 |
| ATR     | 0.086754 | 15 | 6.435232032  | 0.036855 | 0.998439386 |
| CUBN    | 0.08719  | 49 | -11.09977712 | 0.120393 | 0.998439386 |
| MAPK10  | 0.087476 | 7  | -4.430591172 | 0.017199 | 0.998439386 |
| KDM5A   | 0.089913 | 16 | -6.572219837 | 0.039312 | 0.998439386 |
| SOS1    | 0.091124 | 15 | -6.347775097 | 0.036855 | 0.998439386 |
| JAG2    | 0.091347 | 5  | -3.708779248 | 0.012285 | 0.998439386 |
| CSF1R   | 0.092495 | 14 | 6.114481777  | 0.034398 | 0.998439386 |
| ROS1    | 0.09377  | 18 | -6.870974228 | 0.044226 | 0.998439386 |
| HOXA9   | 0.096717 | 5  | -3.648697588 | 0.012285 | 0.998439386 |
| GUCY1A2 | 0.097086 | 15 | 6.233736506  | 0.036855 | 0.998439386 |
| ERBB2   | 0.099683 | 19 | 6.926298862  | 0.046683 | 0.998439386 |
| EPHA8   | 0.099757 | 14 | -5.982381225 | 0.034398 | 0.998439386 |
| CREBBP  | 0.10027  | 27 | 8.15700114   | 0.066339 | 0.998439386 |
| TET2    | 0.100879 | 20 | -7.072134764 | 0.04914  | 0.998439386 |
| TSC1    | 0.101348 | 14 | -5.954470306 | 0.034398 | 0.998439386 |
| VPS13B  | 0.104423 | 47 | 10.3490776   | 0.115479 | 0.998439386 |
| FLT3    | 0.105895 | 19 | 6.802321116  | 0.046683 | 0.998439386 |
| NCOA7   | 0.108004 | 14 | -5.841357666 | 0.034398 | 0.998439386 |
| PTPN6   | 0.108203 | 7  | -4.164730033 | 0.017199 | 0.998439386 |
| DLC1    | 0.108524 | 24 | -7.539081278 | 0.058968 | 0.998439386 |



|           |          |    |              |          |             |
|-----------|----------|----|--------------|----------|-------------|
| GTPBP4    | 0.109484 | 5  | -3.515874852 | 0.012285 | 0.998439386 |
| LPHN1     | 0.109764 | 13 | 5.608061545  | 0.031941 | 0.998439386 |
| NLRP8     | 0.109766 | 18 | 6.556943273  | 0.044226 | 0.998439386 |
| NCAM1     | 0.111013 | 18 | 6.534030562  | 0.044226 | 0.998439386 |
| MAST4     | 0.115663 | 33 | -8.563732609 | 0.081081 | 0.998439386 |
| TNK2      | 0.117009 | 8  | 4.339112887  | 0.019656 | 0.998439386 |
| GLI3      | 0.117271 | 30 | -8.161876029 | 0.07371  | 0.998439386 |
| ITGB3     | 0.117527 | 11 | -5.061732725 | 0.027027 | 0.998439386 |
| FLI1      | 0.118235 | 5  | -3.431761885 | 0.012285 | 0.998439386 |
| LAMC1     | 0.120433 | 16 | -6.018431178 | 0.039312 | 0.998439386 |
| PLXNB3    | 0.122831 | 13 | 5.410788503  | 0.031941 | 0.998439386 |
| NEK9      | 0.123632 | 5  | 3.382286773  | 0.012285 | 0.998439386 |
| MSH3      | 0.124268 | 11 | 4.970746867  | 0.027027 | 0.998439386 |
| NOTCH4    | 0.125806 | 32 | -8.216732369 | 0.078624 | 0.998439386 |
| DAB2      | 0.126289 | 8  | -4.232392908 | 0.019656 | 0.998439386 |
| APBB1IP   | 0.126889 | 10 | 4.712623773  | 0.02457  | 0.998439386 |
| SNAI3     | 0.128339 | 7  | -3.942699949 | 0.017199 | 0.998439386 |
| NFKB2     | 0.130445 | 7  | -3.921081938 | 0.017199 | 0.998439386 |
| IRAK2     | 0.131565 | 11 | -4.876502963 | 0.027027 | 0.998439386 |
| GRM7      | 0.135097 | 16 | 5.791110389  | 0.039312 | 0.998439386 |
| PLCG2     | 0.135291 | 22 | -6.735017774 | 0.054054 | 0.998439386 |
| LTK       | 0.135551 | 16 | -5.784372391 | 0.039312 | 0.998439386 |
| MMP9      | 0.135956 | 15 | 5.602049945  | 0.036855 | 0.998439386 |
| BAI2      | 0.136808 | 18 | -6.099945854 | 0.044226 | 0.998439386 |
| TNFRSF8   | 0.136825 | 10 | -4.592941313 | 0.02457  | 0.998439386 |
| NEK11     | 0.138658 | 12 | 4.995311391  | 0.029484 | 0.998439386 |
| PLA2G4A   | 0.138845 | 5  | -3.251369349 | 0.012285 | 0.998439386 |
| HDAC4     | 0.139723 | 8  | -4.088230602 | 0.019656 | 0.998439386 |
| PLD2      | 0.142423 | 14 | -5.331068362 | 0.034398 | 0.998439386 |
| CCDC63    | 0.143144 | 19 | 6.159743247  | 0.046683 | 0.998439386 |
| CD44      | 0.14454  | 8  | -4.039140236 | 0.019656 | 0.998439386 |
| DAXX      | 0.144635 | 5  | -3.204443918 | 0.012285 | 0.998439386 |
| IKBKAP    | 0.145557 | 12 | -4.909621658 | 0.029484 | 0.998439386 |
| RNF123    | 0.145644 | 11 | -4.705542242 | 0.027027 | 0.998439386 |
| PIK3R3    | 0.146112 | 6  | -3.493078448 | 0.014742 | 0.998439386 |
| NCOA2     | 0.148954 | 16 | -5.593203193 | 0.039312 | 0.998439386 |
| LRRN3     | 0.149513 | 6  | 3.46388469   | 0.014742 | 0.998439386 |
| PTPN14    | 0.150694 | 21 | 6.339580005  | 0.051597 | 0.998439386 |
| IL12B     | 0.150868 | 8  | -3.976524653 | 0.019656 | 0.998439386 |
| PDK1      | 0.151027 | 6  | -3.451045877 | 0.014742 | 0.998439386 |
| STK32C    | 0.151134 | 6  | -3.45014495  | 0.014742 | 0.998439386 |
| MLH1      | 0.154743 | 13 | -4.989905733 | 0.031941 | 0.998439386 |
| EPHA1     | 0.154895 | 12 | 4.798460983  | 0.029484 | 0.998439386 |
| DGKB      | 0.156708 | 9  | 4.153089662  | 0.022113 | 0.998439386 |
| WNK4      | 0.156889 | 13 | 4.964088906  | 0.031941 | 0.998439386 |
| TNFRSF10A | 0.157531 | 8  | 3.912723853  | 0.019656 | 0.998439386 |

|          |          |    |              |          |             |
|----------|----------|----|--------------|----------|-------------|
| FLNB     | 0.157883 | 36 | -7.996826867 | 0.088452 | 0.998439386 |
| BAX      | 0.15937  | 5  | 3.09119734   | 0.012285 | 0.998439386 |
| BIRC7    | 0.160438 | 6  | 3.373389217  | 0.014742 | 0.998439386 |
| THRAP3   | 0.160668 | 8  | -3.883393989 | 0.019656 | 0.998439386 |
| CES3     | 0.163047 | 7  | 3.616561525  | 0.017199 | 0.998439386 |
| PRDM16   | 0.163873 | 19 | 5.856767233  | 0.046683 | 0.998439386 |
| BCL6     | 0.163891 | 11 | -4.501845899 | 0.027027 | 0.998439386 |
| LARGE    | 0.164431 | 11 | 4.496088363  | 0.027027 | 0.998439386 |
| NBN      | 0.166962 | 8  | -3.825818329 | 0.019656 | 0.998439386 |
| ITCH     | 0.173026 | 5  | 2.993116642  | 0.012285 | 0.998439386 |
| ITGAV    | 0.173345 | 7  | -3.53006595  | 0.017199 | 0.998439386 |
| MKNK2    | 0.173503 | 5  | -2.989801389 | 0.012285 | 0.998439386 |
| DLL3     | 0.174218 | 5  | -2.98483552  | 0.012285 | 0.998439386 |
| TERT     | 0.174583 | 8  | 3.758250963  | 0.019656 | 0.998439386 |
| ERCC4    | 0.177957 | 11 | -4.356217227 | 0.027027 | 0.998439386 |
| LTF      | 0.178354 | 14 | -4.891353158 | 0.034398 | 0.998439386 |
| PPP2R2B  | 0.180562 | 5  | -2.941457944 | 0.012285 | 0.998439386 |
| ADCY9    | 0.180753 | 21 | -5.904414048 | 0.051597 | 0.998439386 |
| HERC3    | 0.181119 | 8  | -3.702035595 | 0.019656 | 0.998439386 |
| TRIO     | 0.182183 | 17 | -5.322415341 | 0.041769 | 0.998439386 |
| KIAA1409 | 0.184129 | 26 | 6.476957859  | 0.063882 | 0.998439386 |
| PPP1R3A  | 0.184282 | 17 | -5.296968671 | 0.041769 | 0.998439386 |
| PTPN21   | 0.188156 | 17 | -5.250561702 | 0.041769 | 0.998439386 |
| SYNE2    | 0.189685 | 60 | 9.272309922  | 0.14742  | 0.998439386 |
| AR       | 0.190871 | 21 | -5.770161178 | 0.051597 | 0.998439386 |
| RPTOR    | 0.19348  | 6  | -3.125244384 | 0.014742 | 0.998439386 |
| ORM1     | 0.195961 | 5  | -2.840667683 | 0.012285 | 0.998439386 |
| IGF2R    | 0.197028 | 21 | 5.691021314  | 0.051597 | 0.998439386 |
| IL21R    | 0.197088 | 9  | -3.782605532 | 0.022113 | 0.998439386 |
| PKHD1    | 0.197464 | 61 | -9.174177744 | 0.149877 | 0.998439386 |
| GPR124   | 0.198282 | 23 | -5.923818526 | 0.056511 | 0.998439386 |
| DNMT3B   | 0.198773 | 6  | 3.088479076  | 0.014742 | 0.998439386 |
| STIM1    | 0.203538 | 7  | -3.29672616  | 0.017199 | 0.998439386 |
| EPHB1    | 0.204202 | 11 | 4.105912989  | 0.027027 | 0.998439386 |
| STAT4    | 0.204488 | 7  | -3.289806922 | 0.017199 | 0.998439386 |
| SMAD4    | 0.205141 | 48 | -8.149533793 | 0.117936 | 0.998439386 |
| ALOX15   | 0.205753 | 11 | -4.091876548 | 0.027027 | 0.998439386 |
| PDGFRL   | 0.205963 | 7  | -3.279114213 | 0.017199 | 0.998439386 |
| PTPRS    | 0.206604 | 28 | -6.374747636 | 0.068796 | 0.998439386 |
| APC2     | 0.207003 | 17 | -5.034306024 | 0.041769 | 0.998439386 |
| MYB      | 0.207475 | 9  | 3.696528991  | 0.022113 | 0.998439386 |
| INSR     | 0.209621 | 11 | 4.05720826   | 0.027027 | 0.998439386 |
| TBCK     | 0.212812 | 8  | -3.448887743 | 0.019656 | 0.998439386 |
| DTX1     | 0.213679 | 5  | 2.731639196  | 0.012285 | 0.998439386 |
| FANCG    | 0.214349 | 8  | 3.437330402  | 0.019656 | 0.998439386 |
| CHKB     | 0.214953 | 6  | -2.980342018 | 0.014742 | 0.998439386 |

|         |          |    |              |          |             |
|---------|----------|----|--------------|----------|-------------|
| NUP98   | 0.215197 | 15 | -4.656665888 | 0.036855 | 0.998439386 |
| MTOR    | 0.215813 | 20 | 5.335490065  | 0.04914  | 0.998439386 |
| DOT1L   | 0.216519 | 10 | -3.81532706  | 0.02457  | 0.998439386 |
| ZBTB16  | 0.217309 | 7  | -3.198665388 | 0.017199 | 0.998439386 |
| LRP5    | 0.217519 | 12 | 4.159877093  | 0.029484 | 0.998439386 |
| RASSF1  | 0.221596 | 7  | 3.169057993  | 0.017199 | 0.998439386 |
| IKZF3   | 0.22523  | 7  | 3.144281972  | 0.017199 | 0.998439386 |
| ARHGAP6 | 0.226777 | 11 | -3.908757798 | 0.027027 | 0.998439386 |
| ANAPC5  | 0.227599 | 8  | 3.340087714  | 0.019656 | 0.998439386 |
| NUP153  | 0.227825 | 11 | -3.899954278 | 0.027027 | 0.998439386 |
| CMAS    | 0.228901 | 5  | -2.643073809 | 0.012285 | 0.998439386 |
| TWF2    | 0.229402 | 5  | -2.640226793 | 0.012285 | 0.998439386 |
| TTK     | 0.229734 | 5  | -2.638345257 | 0.012285 | 0.998439386 |
| ATM     | 0.23178  | 47 | -7.621302275 | 0.115479 | 0.998439386 |
| MUTYH   | 0.231841 | 13 | -4.192681792 | 0.031941 | 0.998439386 |
| TOP2B   | 0.233009 | 10 | -3.681979533 | 0.02457  | 0.998439386 |
| SOX11   | 0.233788 | 10 | 3.675844271  | 0.02457  | 0.998439386 |
| IRS2    | 0.23655  | 8  | 3.27665805   | 0.019656 | 0.998439386 |
| LIG4    | 0.236565 | 12 | -3.992773653 | 0.029484 | 0.998439386 |
| CD4     | 0.23695  | 6  | -2.842349608 | 0.014742 | 0.998439386 |
| PREX1   | 0.23745  | 12 | 3.98524731   | 0.029484 | 0.998439386 |
| CBFA2T3 | 0.237754 | 13 | -4.140042641 | 0.031941 | 0.998439386 |
| AXL     | 0.238606 | 18 | -4.831789973 | 0.044226 | 0.998439386 |
| USP8    | 0.240125 | 6  | -2.823188565 | 0.014742 | 0.998439386 |
| GPR84   | 0.242456 | 5  | -2.56766772  | 0.012285 | 0.998439386 |
| PML     | 0.243739 | 7  | -3.02230048  | 0.017199 | 0.998439386 |
| LDHA    | 0.243983 | 5  | -2.559363651 | 0.012285 | 0.998439386 |
| RAPH1   | 0.244738 | 8  | -3.220109845 | 0.019656 | 0.998439386 |
| PARP14  | 0.24486  | 19 | -4.89237264  | 0.046683 | 0.998439386 |
| INPPL1  | 0.249019 | 11 | -3.727766268 | 0.027027 | 0.998439386 |
| MEX3B   | 0.249499 | 8  | -3.187835091 | 0.019656 | 0.998439386 |
| CELSR2  | 0.249643 | 36 | 6.518843518  | 0.088452 | 0.998439386 |
| CASC5   | 0.249742 | 19 | -4.842101856 | 0.046683 | 0.998439386 |
| CENPF   | 0.250996 | 29 | -5.888933492 | 0.071253 | 0.998439386 |
| HCRTR2  | 0.251106 | 7  | 2.975569181  | 0.017199 | 0.998439386 |
| MITF    | 0.251168 | 8  | -3.176620003 | 0.019656 | 0.998439386 |
| MAS1    | 0.252775 | 6  | 2.748593055  | 0.014742 | 0.998439386 |
| CDS1    | 0.254992 | 8  | -3.151131725 | 0.019656 | 0.998439386 |
| HERC1   | 0.258102 | 26 | -5.51497773  | 0.063882 | 0.998439386 |
| CCDC82  | 0.258189 | 8  | 3.130020483  | 0.019656 | 0.998439386 |
| BCL9L   | 0.258408 | 25 | -5.411498437 | 0.061425 | 0.998439386 |
| MAP3K9  | 0.261788 | 10 | -3.464420545 | 0.02457  | 0.998439386 |
| PDGFB   | 0.262243 | 6  | -2.694446871 | 0.014742 | 0.998439386 |
| TLE4    | 0.26438  | 11 | -3.609289623 | 0.027027 | 0.998439386 |
| DBN1    | 0.264514 | 14 | 4.055231525  | 0.034398 | 0.998439386 |
| AURKC   | 0.264655 | 8  | -3.087870312 | 0.019656 | 0.998439386 |

|                 |          |    |              |          |             |
|-----------------|----------|----|--------------|----------|-------------|
| ATG4D           | 0.265391 | 9  | 3.266037112  | 0.022113 | 0.998439386 |
| NEK10           | 0.266109 | 6  | -2.672721322 | 0.014742 | 0.998439386 |
| RICTOR          | 0.266755 | 11 | 3.591397022  | 0.027027 | 0.998439386 |
| CCR5            | 0.267397 | 5  | 2.436322953  | 0.012285 | 0.998439386 |
| TRRAP           | 0.269812 | 26 | -5.381391773 | 0.063882 | 0.998439386 |
| ITPR1           | 0.270806 | 17 | -4.393409032 | 0.041769 | 0.998439386 |
| BIVM_BIVM_ERCC5 | 0.271485 | 5  | -2.415613429 | 0.012285 | 0.998439386 |
| HDAC9           | 0.27162  | 17 | -4.385953994 | 0.041769 | 0.998439386 |
| BCORL1          | 0.272568 | 11 | -3.548068984 | 0.027027 | 0.998439386 |
| FCGR3A          | 0.274258 | 11 | 3.535587337  | 0.027027 | 0.998439386 |
| TOPBP1          | 0.275756 | 14 | 3.961164996  | 0.034398 | 0.998439386 |
| KAT2B           | 0.275954 | 8  | -3.015886862 | 0.019656 | 0.998439386 |
| TNKS2           | 0.276891 | 7  | -2.81913439  | 0.017199 | 0.998439386 |
| PDGFRA          | 0.277052 | 14 | -3.950493909 | 0.034398 | 0.998439386 |
| ABCB1           | 0.278138 | 9  | -3.180326598 | 0.022113 | 0.998439386 |
| DPYSL4          | 0.27883  | 6  | -2.602747896 | 0.014742 | 0.998439386 |
| FBXO10          | 0.280187 | 10 | -3.333907262 | 0.02457  | 0.998439386 |
| PPM1D           | 0.281848 | 6  | 2.586464265  | 0.014742 | 0.998439386 |
| ABCA3           | 0.283539 | 25 | -5.134936803 | 0.061425 | 0.998439386 |
| PARP2           | 0.283901 | 11 | 3.46537896   | 0.027027 | 0.998439386 |
| FAM123B         | 0.284098 | 35 | -5.988727698 | 0.085995 | 0.998439386 |
| CALCR           | 0.284507 | 11 | 3.461018726  | 0.027027 | 0.998439386 |
| GRM6            | 0.284685 | 16 | -4.146181321 | 0.039312 | 0.998439386 |
| TLN1            | 0.285252 | 15 | 4.014920141  | 0.036855 | 0.998439386 |
| PFKFB2          | 0.286762 | 8  | -2.948892376 | 0.019656 | 0.998439386 |
| MLL2            | 0.287232 | 52 | -7.08466733  | 0.127764 | 0.998439386 |
| CASP8           | 0.288482 | 7  | -2.752050033 | 0.017199 | 0.998439386 |
| CDC25C          | 0.289806 | 5  | -2.32532218  | 0.012285 | 0.998439386 |
| PIK3C2G         | 0.293563 | 20 | -4.52766193  | 0.04914  | 0.998439386 |
| EP400           | 0.296196 | 23 | 4.810228261  | 0.056511 | 0.998439386 |
| MCM3AP          | 0.298723 | 10 | -3.208185424 | 0.02457  | 0.998439386 |
| FGFR3           | 0.299072 | 12 | 3.502992836  | 0.029484 | 0.998439386 |
| IRAK3           | 0.29955  | 9  | 3.042167602  | 0.022113 | 0.998439386 |
| INPP4A          | 0.299583 | 5  | -2.278709356 | 0.012285 | 0.998439386 |
| TNFAIP3         | 0.300736 | 9  | -3.034712884 | 0.022113 | 0.998439386 |
| DUSP10          | 0.301479 | 5  | -2.269789619 | 0.012285 | 0.998439386 |
| STK32B          | 0.30283  | 8  | -2.852364257 | 0.019656 | 0.998439386 |
| CDKN1B          | 0.303021 | 7  | 2.670433597  | 0.017199 | 0.998439386 |
| CAD             | 0.307561 | 19 | -4.292574634 | 0.046683 | 0.998439386 |
| ITGB4           | 0.307709 | 20 | -4.397069366 | 0.04914  | 0.998439386 |
| GRM3            | 0.309851 | 12 | -3.425776678 | 0.029484 | 0.998439386 |
| CDH2            | 0.311105 | 13 | -3.552332546 | 0.031941 | 0.998439386 |
| UMPS            | 0.313398 | 5  | -2.214545283 | 0.012285 | 0.998439386 |
| PDGFRB          | 0.314317 | 12 | 3.39430265   | 0.029484 | 0.998439386 |
| ARID1A          | 0.315498 | 35 | -5.61185924  | 0.085995 | 0.998439386 |
| MYH11           | 0.316732 | 26 | 4.88250999   | 0.063882 | 0.998439386 |

|          |          |     |              |          |             |
|----------|----------|-----|--------------|----------|-------------|
| FES      | 0.318511 | 10  | -3.079590831 | 0.02457  | 0.998439386 |
| FLT1     | 0.319026 | 11  | -3.222397585 | 0.027027 | 0.998439386 |
| TCF7L2   | 0.319188 | 36  | 5.640635441  | 0.088452 | 0.998439386 |
| GRK5     | 0.320246 | 5   | 2.183427803  | 0.012285 | 0.998439386 |
| EPHA5    | 0.322545 | 20  | -4.264300597 | 0.04914  | 0.998439386 |
| PALB2    | 0.322687 | 12  | -3.33609858  | 0.029484 | 0.998439386 |
| CHD5     | 0.324109 | 10  | -3.044166744 | 0.02457  | 0.998439386 |
| MARK4    | 0.325065 | 5   | -2.161790808 | 0.012285 | 0.998439386 |
| CYP3A5   | 0.325351 | 6   | -2.363778994 | 0.014742 | 0.998439386 |
| ABL1     | 0.327358 | 15  | -3.679980133 | 0.036855 | 0.998439386 |
| INSRR    | 0.328005 | 11  | -3.163151826 | 0.027027 | 0.998439386 |
| CYP1B1   | 0.328049 | 5   | 2.148497266  | 0.012285 | 0.998439386 |
| PTPRJ    | 0.328194 | 17  | 3.900885478  | 0.041769 | 0.998439386 |
| ZEB2     | 0.329663 | 7   | -2.527357558 | 0.017199 | 0.998439386 |
| MUC1     | 0.329982 | 7   | -2.525690935 | 0.017199 | 0.998439386 |
| VAV1     | 0.332414 | 5   | 2.129189729  | 0.012285 | 0.998439386 |
| TTN      | 0.337227 | 263 | -9.150633646 | 0.646192 | 0.998439386 |
| EIF2AK1  | 0.339172 | 6   | -2.297160994 | 0.014742 | 0.998439386 |
| FH       | 0.339218 | 5   | 2.099422281  | 0.012285 | 0.998439386 |
| HSP90AB1 | 0.340836 | 6   | -2.289256335 | 0.014742 | 0.998439386 |
| PTPN22   | 0.341257 | 9   | -2.790815046 | 0.022113 | 0.998439386 |
| ESR1     | 0.341702 | 12  | -3.207427917 | 0.029484 | 0.998439386 |
| LPHN2    | 0.345425 | 17  | -3.764213447 | 0.041769 | 0.998439386 |
| EXOC4    | 0.347034 | 8   | -2.603151257 | 0.019656 | 0.998439386 |
| BID      | 0.347355 | 6   | -2.258534673 | 0.014742 | 0.998439386 |
| KIF16B   | 0.349007 | 18  | 3.839737772  | 0.044226 | 0.998439386 |
| BPTF     | 0.350435 | 25  | -4.471008543 | 0.061425 | 0.998439386 |
| ILK      | 0.35152  | 9   | -2.732045604 | 0.022113 | 0.998439386 |
| PPP2R1A  | 0.351587 | 11  | -3.012377718 | 0.027027 | 0.998439386 |
| ZMYM4    | 0.353885 | 8   | -2.566395163 | 0.019656 | 0.998439386 |
| PCDHB2   | 0.355927 | 12  | -3.114143562 | 0.029484 | 0.998439386 |
| KDM4C    | 0.356824 | 5   | 2.024125948  | 0.012285 | 0.998439386 |
| PLD1     | 0.358779 | 10  | 2.833142061  | 0.02457  | 0.998439386 |
| WNK1     | 0.358792 | 14  | -3.335199064 | 0.034398 | 0.998439386 |
| GRB10    | 0.358907 | 5   | -2.015370592 | 0.012285 | 0.998439386 |
| ETV4     | 0.359055 | 5   | -2.014750848 | 0.012285 | 0.998439386 |
| IKZF1    | 0.360618 | 8   | 2.530710276  | 0.019656 | 0.998439386 |
| BIRC2    | 0.362544 | 6   | -2.188348209 | 0.014742 | 0.998439386 |
| BCAT1    | 0.363455 | 11  | 2.938922781  | 0.027027 | 0.998439386 |
| TECTA    | 0.363487 | 29  | -4.661870975 | 0.071253 | 0.998439386 |
| FRMD7    | 0.364013 | 5   | -1.99405476  | 0.012285 | 0.998439386 |
| ERC1     | 0.364695 | 9   | 2.658180507  | 0.022113 | 0.998439386 |
| SHC1     | 0.365285 | 8   | 2.506213493  | 0.019656 | 0.998439386 |
| NRAS     | 0.365926 | 13  | 3.170488154  | 0.031941 | 0.998439386 |
| SPTAN1   | 0.367571 | 14  | -3.27472995  | 0.034398 | 0.998439386 |
| MSN      | 0.369161 | 7   | -2.328372814 | 0.017199 | 0.998439386 |

|                  |          |     |              |          |             |
|------------------|----------|-----|--------------|----------|-------------|
| RBL1             | 0.370471 | 8   | -2.479228955 | 0.019656 | 0.998439386 |
| MTHFR            | 0.372928 | 7   | 2.310113051  | 0.017199 | 0.998439386 |
| PDZRN4           | 0.373115 | 19  | 3.74693806   | 0.046683 | 0.998439386 |
| DNMT1            | 0.373695 | 8   | -2.462566866 | 0.019656 | 0.998439386 |
| BAI3             | 0.373744 | 23  | 4.095831625  | 0.056511 | 0.998439386 |
| SYK              | 0.373788 | 5   | -1.953754576 | 0.012285 | 0.998439386 |
| NLK              | 0.373812 | 7   | 2.305842297  | 0.017199 | 0.998439386 |
| PTPN11           | 0.374602 | 7   | -2.302031425 | 0.017199 | 0.998439386 |
| TNKS             | 0.375512 | 13  | -3.10759546  | 0.031941 | 0.998439386 |
| BIVM_ERCC5_ERCC5 | 0.380156 | 11  | -2.838047904 | 0.027027 | 0.998439386 |
| PTPRG            | 0.380572 | 12  | -2.95791952  | 0.029484 | 0.998439386 |
| FGFR1            | 0.380877 | 5   | -1.924939117 | 0.012285 | 0.998439386 |
| TMPRSS2          | 0.380958 | 6   | 2.105680486  | 0.014742 | 0.998439386 |
| CASK             | 0.382643 | 6   | -2.098241112 | 0.014742 | 0.998439386 |
| SLC22A2          | 0.383622 | 6   | -2.093927613 | 0.014742 | 0.998439386 |
| PTCH1            | 0.38493  | 13  | -3.046765456 | 0.031941 | 0.998439386 |
| NFKB1            | 0.385467 | 6   | -2.085818611 | 0.014742 | 0.998439386 |
| MEF2C            | 0.386085 | 5   | -1.903974249 | 0.012285 | 0.998439386 |
| CD33             | 0.388517 | 9   | -2.528723916 | 0.022113 | 0.998439386 |
| HUS1             | 0.389424 | 6   | 2.068499702  | 0.014742 | 0.998439386 |
| DKK1             | 0.391634 | 5   | 1.881831064  | 0.012285 | 0.998439386 |
| OR8G1            | 0.396413 | 6   | -2.038173739 | 0.014742 | 0.998439386 |
| PARP1            | 0.397429 | 8   | -2.342560501 | 0.019656 | 0.998439386 |
| TMEFF2           | 0.398005 | 6   | -2.03131245  | 0.014742 | 0.998439386 |
| EPHB6            | 0.39812  | 13  | -2.963080073 | 0.031941 | 0.998439386 |
| PIK3CB           | 0.398788 | 6   | 2.027943353  | 0.014742 | 0.998439386 |
| TCF              | 0.399447 | 38  | 4.888847469  | 0.093366 | 0.998439386 |
| MAP3K11          | 0.400233 | 9   | -2.466831698 | 0.022113 | 0.998439386 |
| HDLBP            | 0.402901 | 6   | -2.010310807 | 0.014742 | 0.998439386 |
| PLCG1            | 0.403117 | 10  | -2.581139311 | 0.02457  | 0.998439386 |
| BAZ1A            | 0.404069 | 9   | 2.446807867  | 0.022113 | 0.998439386 |
| TEX14            | 0.404812 | 21  | -3.674970248 | 0.051597 | 0.998439386 |
| TRIM24           | 0.40551  | 9   | -2.439315791 | 0.022113 | 0.998439386 |
| d_meta           | 0.405866 | 158 | 8.077996877  | 0.388206 | 0.998439386 |
| MN1              | 0.406046 | 7   | -2.154209691 | 0.017199 | 0.998439386 |
| CBLB             | 0.406578 | 13  | 2.910295121  | 0.031941 | 0.998439386 |
| meta             | 0.407248 | 161 | 8.081216393  | 0.395577 | 0.998439386 |
| ARAF             | 0.407279 | 8   | 2.294032608  | 0.019656 | 0.998439386 |
| ELK3             | 0.408283 | 11  | -2.674126664 | 0.027027 | 0.998439386 |
| PLAU             | 0.408437 | 6   | 1.986750954  | 0.014742 | 0.998439386 |
| VEGFC            | 0.409889 | 14  | -2.995086161 | 0.034398 | 0.998439386 |
| CNTRL            | 0.410354 | 28  | -4.155432941 | 0.068796 | 0.998439386 |
| PHOX2B           | 0.410407 | 5   | -1.808284088 | 0.012285 | 0.998439386 |
| PXN              | 0.410412 | 11  | -2.66199756  | 0.027027 | 0.998439386 |
| USP54            | 0.412542 | 17  | 3.269208166  | 0.041769 | 0.998439386 |
| MAP3K2           | 0.413873 | 5   | -1.794925045 | 0.012285 | 0.998439386 |

|          |          |    |              |          |             |
|----------|----------|----|--------------|----------|-------------|
| ADAMTS20 | 0.414981 | 31 | 4.312136585  | 0.076167 | 0.998439386 |
| MAPK8IP3 | 0.416561 | 8  | -2.248940051 | 0.019656 | 0.998439386 |
| USP6NL   | 0.417335 | 8  | 2.245203919  | 0.019656 | 0.998439386 |
| FANCB    | 0.420353 | 13 | 2.825706535  | 0.031941 | 0.998439386 |
| ADH7     | 0.424198 | 5  | -1.755522211 | 0.012285 | 0.998439386 |
| GRM5     | 0.424821 | 11 | 2.580884317  | 0.027027 | 0.998439386 |
| NEDD4L   | 0.427058 | 6  | -1.908853923 | 0.014742 | 0.998439386 |
| GEN1     | 0.427464 | 10 | -2.449845179 | 0.02457  | 0.998439386 |
| UVRAG    | 0.427643 | 7  | -2.056620035 | 0.017199 | 0.998439386 |
| ERN2     | 0.428121 | 11 | -2.562531841 | 0.027027 | 0.998439386 |
| HLA_A    | 0.429401 | 66 | 5.808589012  | 0.162162 | 0.998439386 |
| EVC2     | 0.430234 | 18 | -3.234063378 | 0.044226 | 0.998439386 |
| ATP8B1   | 0.432037 | 6  | -1.888362891 | 0.014742 | 0.998439386 |
| MAP2K4   | 0.432793 | 8  | -2.171478692 | 0.019656 | 0.998439386 |
| WT1      | 0.434294 | 7  | 2.027149627  | 0.017199 | 0.998439386 |
| CDH11    | 0.435208 | 20 | 3.363665312  | 0.04914  | 0.998439386 |
| PRKDC    | 0.435614 | 36 | 4.414653025  | 0.088452 | 0.998439386 |
| FASN     | 0.439094 | 19 | -3.255020016 | 0.046683 | 0.998439386 |
| KSR1     | 0.441849 | 9  | 2.255312446  | 0.022113 | 0.998439386 |
| KDR      | 0.442417 | 14 | -2.791664398 | 0.034398 | 0.998439386 |
| PDGFA    | 0.442626 | 5  | 1.686561406  | 0.012285 | 0.998439386 |
| ADORA2A  | 0.443221 | 7  | 1.987999492  | 0.017199 | 0.998439386 |
| MAP4K4   | 0.443413 | 11 | -2.478556371 | 0.027027 | 0.998439386 |
| GPR81    | 0.443621 | 7  | -1.986255882 | 0.017199 | 0.998439386 |
| IRS4     | 0.444882 | 19 | 3.214006855  | 0.046683 | 0.998439386 |
| RASA3    | 0.445096 | 7  | -1.97983569  | 0.017199 | 0.998439386 |
| DCLK3    | 0.446464 | 9  | -2.232578888 | 0.022113 | 0.998439386 |
| NEK8     | 0.447373 | 7  | 1.969945629  | 0.017199 | 0.998439386 |
| NOTCH1   | 0.449161 | 30 | 3.943630571  | 0.07371  | 0.998439386 |
| DLL1     | 0.449343 | 5  | 1.661835896  | 0.012285 | 0.998439386 |
| LRRC7    | 0.449588 | 12 | -2.550614358 | 0.029484 | 0.998439386 |
| ZC3H12B  | 0.451011 | 6  | 1.811502108  | 0.014742 | 0.998439386 |
| EPHA7    | 0.452291 | 16 | -2.91279774  | 0.039312 | 0.998439386 |
| RYK      | 0.452391 | 6  | 1.805983536  | 0.014742 | 0.998439386 |
| ATG16L2  | 0.452498 | 8  | -2.07967195  | 0.019656 | 0.998439386 |
| GNAS     | 0.454362 | 33 | -4.07252811  | 0.081081 | 0.998439386 |
| PTPRT    | 0.45447  | 30 | 3.897612406  | 0.07371  | 0.998439386 |
| BCR      | 0.455541 | 13 | -2.616708784 | 0.031941 | 0.998439386 |
| PLAG1    | 0.457772 | 5  | 1.631102386  | 0.012285 | 0.998439386 |
| TBX22    | 0.461524 | 5  | -1.617526291 | 0.012285 | 0.998439386 |
| MYLK2    | 0.462625 | 5  | -1.613554216 | 0.012285 | 0.998439386 |
| WNT2B    | 0.465259 | 9  | 2.141351771  | 0.022113 | 0.998439386 |
| ARAP3    | 0.465377 | 19 | 3.071167668  | 0.046683 | 0.998439386 |
| MYST4    | 0.467876 | 16 | -2.813351023 | 0.039312 | 0.998439386 |
| NUAK2    | 0.469245 | 9  | -2.122271823 | 0.022113 | 0.998439386 |
| RB1CC1   | 0.47011  | 9  | -2.11814165  | 0.022113 | 0.998439386 |

|         |          |     |              |          |             |
|---------|----------|-----|--------------|----------|-------------|
| ZNF217  | 0.472023 | 12  | -2.426098643 | 0.029484 | 0.998439386 |
| NFATC3  | 0.473614 | 11  | 2.31740709   | 0.027027 | 0.998439386 |
| SIRT1   | 0.475048 | 5   | -1.569090326 | 0.012285 | 0.998439386 |
| ZNF442  | 0.47552  | 7   | -1.849968978 | 0.017199 | 0.998439386 |
| TTBK2   | 0.476188 | 8   | -1.972236198 | 0.019656 | 0.998439386 |
| RECQL4  | 0.476261 | 21  | -3.14238305  | 0.051597 | 0.998439386 |
| MYCN    | 0.477744 | 5   | 1.559525639  | 0.012285 | 0.998439386 |
| FGFR4   | 0.47946  | 9   | -2.073777334 | 0.022113 | 0.998439386 |
| ITK     | 0.480298 | 5   | -1.550491677 | 0.012285 | 0.998439386 |
| DGKZ    | 0.480742 | 8   | -1.951925524 | 0.019656 | 0.998439386 |
| OBSCN   | 0.481553 | 109 | 6.215131015  | 0.267813 | 0.998439386 |
| KTN1    | 0.482954 | 12  | -2.366619202 | 0.029484 | 0.998439386 |
| ITGAL   | 0.483552 | 10  | -2.162921269 | 0.02457  | 0.998439386 |
| SPO11   | 0.484671 | 7   | 1.811810368  | 0.017199 | 0.998439386 |
| TRIP11  | 0.484979 | 15  | -2.623711302 | 0.036855 | 0.998439386 |
| XPC     | 0.492882 | 6   | -1.648075539 | 0.014742 | 0.998439386 |
| PPP2R3A | 0.493238 | 13  | -2.402655071 | 0.031941 | 0.998439386 |
| POLE    | 0.49707  | 23  | -3.127105851 | 0.056511 | 0.998439386 |
| CDC25B  | 0.497713 | 8   | -1.877135886 | 0.019656 | 0.998439386 |
| EXT2    | 0.499079 | 10  | -2.08678667  | 0.02457  | 0.998439386 |
| HAPLN1  | 0.501164 | 7   | 1.744010033  | 0.017199 | 0.998439386 |
| CD248   | 0.503212 | 6   | -1.608932381 | 0.014742 | 0.998439386 |
| MRE11A  | 0.503817 | 9   | -1.960363659 | 0.022113 | 0.998439386 |
| MAGI2   | 0.504598 | 26  | 3.254072017  | 0.063882 | 0.998439386 |
| IGFBP5  | 0.504675 | 6   | -1.603422137 | 0.014742 | 0.998439386 |
| NEIL3   | 0.504858 | 7   | -1.728990024 | 0.017199 | 0.998439386 |
| SLC6A18 | 0.506044 | 9   | -1.950140652 | 0.022113 | 0.998439386 |
| ODZ1    | 0.506615 | 41  | 3.986140549  | 0.100737 | 0.998439386 |
| CDH20   | 0.509609 | 8   | -1.825519852 | 0.019656 | 0.998439386 |
| PLCH1   | 0.5112   | 16  | -2.546065563 | 0.039312 | 0.998439386 |
| TEK     | 0.513747 | 9   | -1.914962503 | 0.022113 | 0.998439386 |
| COL1A1  | 0.513956 | 20  | -2.813533799 | 0.04914  | 0.998439386 |
| BRIP1   | 0.515792 | 8   | -1.798940933 | 0.019656 | 0.998439386 |
| TSHR    | 0.517952 | 9   | -1.895877869 | 0.022113 | 0.998439386 |
| LIG3    | 0.520011 | 9   | 1.886561424  | 0.022113 | 0.998439386 |
| PLAT    | 0.521875 | 10  | -1.977244244 | 0.02457  | 0.998439386 |
| PRRC2C  | 0.522082 | 23  | -2.94766933  | 0.056511 | 0.998439386 |
| GLI1    | 0.522579 | 12  | -2.156851432 | 0.029484 | 0.998439386 |
| USP7    | 0.522909 | 10  | 1.972339357  | 0.02457  | 0.998439386 |
| ROCK2   | 0.523642 | 13  | -2.236347653 | 0.031941 | 0.998439386 |
| MAMDC4  | 0.523742 | 24  | 2.99516209   | 0.058968 | 0.998439386 |
| APAF1   | 0.524397 | 17  | -2.539720971 | 0.041769 | 0.998439386 |
| NOS2    | 0.528019 | 11  | 2.040662666  | 0.027027 | 0.998439386 |
| HSD17B2 | 0.528556 | 6   | -1.514641542 | 0.014742 | 0.998439386 |
| MSH2    | 0.53059  | 7   | 1.625901785  | 0.017199 | 0.998439386 |
| CDK12   | 0.53132  | 10  | -1.932587396 | 0.02457  | 0.998439386 |



|           |          |    |              |          |             |
|-----------|----------|----|--------------|----------|-------------|
| STIL      | 0.531553 | 11 | -2.023213453 | 0.027027 | 0.998439386 |
| SMO       | 0.533034 | 9  | -1.828065299 | 0.022113 | 0.998439386 |
| CHEK2     | 0.534608 | 9  | -1.821045854 | 0.022113 | 0.998439386 |
| MAP3K6    | 0.534675 | 9  | -1.820747697 | 0.022113 | 0.998439386 |
| ALPK2     | 0.536455 | 22 | -2.787621588 | 0.054054 | 0.998439386 |
| PPARA     | 0.537008 | 6  | 1.483713545  | 0.014742 | 0.998439386 |
| LTBP1     | 0.543284 | 21 | 2.681502387  | 0.051597 | 0.998439386 |
| RPS6KA5   | 0.543314 | 8  | 1.682571591  | 0.019656 | 0.998439386 |
| HECW2     | 0.543514 | 19 | -2.555759094 | 0.046683 | 0.998439386 |
| EPHA4     | 0.544043 | 12 | 2.046658699  | 0.029484 | 0.998439386 |
| VEPH1     | 0.544271 | 9  | 1.778170769  | 0.022113 | 0.998439386 |
| CD8A      | 0.544627 | 6  | -1.456043005 | 0.014742 | 0.998439386 |
| ASXL1     | 0.54485  | 21 | 2.67109293   | 0.051597 | 0.998439386 |
| SLC6A2    | 0.545413 | 12 | 2.039704057  | 0.029484 | 0.998439386 |
| ZNF831    | 0.545589 | 23 | 2.783022545  | 0.056511 | 0.998439386 |
| RASA1     | 0.545793 | 11 | 1.953488165  | 0.027027 | 0.998439386 |
| MAGI3     | 0.545875 | 9  | 1.771088626  | 0.022113 | 0.998439386 |
| MST1R     | 0.547561 | 18 | -2.465831258 | 0.044226 | 0.998439386 |
| ALS2      | 0.547986 | 11 | -1.942831771 | 0.027027 | 0.998439386 |
| C10orf137 | 0.548773 | 9  | -1.758325998 | 0.022113 | 0.998439386 |
| ERCC2     | 0.549644 | 8  | -1.656230089 | 0.019656 | 0.998439386 |
| PDIA4     | 0.550492 | 10 | 1.843153414  | 0.02457  | 0.998439386 |
| GAB2      | 0.550698 | 8  | -1.651857591 | 0.019656 | 0.998439386 |
| PIK3CD    | 0.551453 | 5  | -1.308328384 | 0.012285 | 0.998439386 |
| GRIN2A    | 0.556244 | 21 | 2.595812289  | 0.051597 | 0.998439386 |
| ABCC3     | 0.557165 | 13 | -2.05861438  | 0.031941 | 0.998439386 |
| UBR4      | 0.558815 | 36 | 3.310353241  | 0.088452 | 0.998439386 |
| CARD11    | 0.559888 | 18 | 2.390345015  | 0.044226 | 0.998439386 |
| MOS       | 0.561423 | 14 | -2.110613643 | 0.034398 | 0.998439386 |
| BMPR1B    | 0.561465 | 12 | 1.958805946  | 0.029484 | 0.998439386 |
| PIK3R1    | 0.561706 | 14 | -2.109091507 | 0.034398 | 0.998439386 |
| AKT1      | 0.564866 | 7  | -1.492438527 | 0.017199 | 0.998439386 |
| MMP16     | 0.569028 | 13 | -1.996990931 | 0.031941 | 0.998439386 |
| NIN       | 0.570637 | 21 | -2.501777838 | 0.051597 | 0.998439386 |
| RIPK4     | 0.570858 | 11 | 1.832906808  | 0.027027 | 0.998439386 |
| ABCC4     | 0.571701 | 9  | -1.658468234 | 0.022113 | 0.998439386 |
| APEX1     | 0.573789 | 5  | -1.235607983 | 0.012285 | 0.998439386 |
| GATA1     | 0.576625 | 5  | -1.226470303 | 0.012285 | 0.998439386 |
| CSNK1G2   | 0.578408 | 5  | 1.220737918  | 0.012285 | 0.998439386 |
| FBXW7     | 0.57856  | 38 | -3.222969148 | 0.093366 | 0.998439386 |
| EXOC2     | 0.580376 | 8  | 1.530390863  | 0.019656 | 0.998439386 |
| PRKCE     | 0.584154 | 8  | 1.51514421   | 0.019656 | 0.998439386 |
| TBK1      | 0.584797 | 5  | -1.200264414 | 0.012285 | 0.998439386 |
| POU1F1    | 0.585933 | 6  | 1.309214814  | 0.014742 | 0.998439386 |
| NRK       | 0.586136 | 14 | -1.978738    | 0.034398 | 0.998439386 |
| EGFL6     | 0.586138 | 5  | 1.195979433  | 0.012285 | 0.998439386 |

|                    |          |    |              |          |             |
|--------------------|----------|----|--------------|----------|-------------|
| XRCC5              | 0.586335 | 8  | 1.506358996  | 0.019656 | 0.998439386 |
| CD14               | 0.589837 | 5  | 1.184187216  | 0.012285 | 0.998439386 |
| NTRK1              | 0.590351 | 13 | 1.887735266  | 0.031941 | 0.998439386 |
| BRD3               | 0.593965 | 5  | -1.171065497 | 0.012285 | 0.998439386 |
| RAF1               | 0.593971 | 6  | 1.28122101   | 0.014742 | 0.998439386 |
| ARID3A             | 0.594318 | 7  | -1.380850176 | 0.017199 | 0.998439386 |
| MAP3K1             | 0.594351 | 13 | 1.867444857  | 0.031941 | 0.998439386 |
| PTPRF              | 0.594353 | 13 | 1.867438769  | 0.031941 | 0.998439386 |
| RB1                | 0.596006 | 7  | 1.374533322  | 0.017199 | 0.998439386 |
| PMS2               | 0.600603 | 8  | 1.449276444  | 0.019656 | 0.998439386 |
| JAK3               | 0.600797 | 28 | 2.641110562  | 0.068796 | 0.998439386 |
| SLC4A4             | 0.601906 | 22 | 2.352371804  | 0.054054 | 0.998439386 |
| TLR4               | 0.603503 | 8  | 1.437749141  | 0.019656 | 0.998439386 |
| MECOM              | 0.603823 | 5  | -1.139896531 | 0.012285 | 0.998439386 |
| MYH9               | 0.604248 | 17 | -2.067827388 | 0.041769 | 0.998439386 |
| TOP2A              | 0.604252 | 13 | -1.817491484 | 0.031941 | 0.998439386 |
| TCF12              | 0.608448 | 6  | -1.231227928 | 0.014742 | 0.998439386 |
| CDC73              | 0.608574 | 6  | 1.230794495  | 0.014742 | 0.998439386 |
| AXIN2              | 0.608642 | 26 | 2.496922868  | 0.063882 | 0.998439386 |
| TRIM37             | 0.609139 | 6  | -1.228854608 | 0.014742 | 0.998439386 |
| COL11A1            | 0.609389 | 20 | -2.2025226   | 0.04914  | 0.998439386 |
| SPEG               | 0.609544 | 36 | 2.892014336  | 0.088452 | 0.998439386 |
| MYC                | 0.610125 | 8  | -1.411521861 | 0.019656 | 0.998439386 |
| ITGA10             | 0.61056  | 11 | -1.64691223  | 0.027027 | 0.998439386 |
| PARK2              | 0.611396 | 9  | 1.489949606  | 0.022113 | 0.998439386 |
| LRP1               | 0.612622 | 43 | -3.103827367 | 0.105651 | 0.998439386 |
| CNTN1              | 0.612746 | 14 | -1.83959123  | 0.034398 | 0.998439386 |
| E4F1               | 0.612764 | 9  | 1.484229474  | 0.022113 | 0.998439386 |
| RGL2               | 0.613759 | 6  | -1.213022208 | 0.014742 | 0.998439386 |
| DDR2               | 0.615856 | 12 | -1.692528687 | 0.029484 | 0.998439386 |
| FPGT_TNNI3K_TNNI3K | 0.616086 | 10 | 1.547958997  | 0.02457  | 0.998439386 |
| KDM6A              | 0.616948 | 11 | -1.61750629  | 0.027027 | 0.998439386 |
| WHSC1              | 0.617238 | 10 | -1.542905187 | 0.02457  | 0.998439386 |
| BRD2               | 0.617573 | 13 | -1.750852858 | 0.031941 | 0.998439386 |
| MACF1              | 0.618539 | 52 | -3.314762973 | 0.127764 | 0.998439386 |
| NOS1               | 0.619201 | 17 | -1.982772967 | 0.041769 | 0.998439386 |
| EPHB2              | 0.619887 | 12 | 1.673228258  | 0.029484 | 0.998439386 |
| MTMR3              | 0.620567 | 10 | 1.528329082  | 0.02457  | 0.998439386 |
| IRF4               | 0.623116 | 5  | -1.079548534 | 0.012285 | 0.998439386 |
| DNAH8              | 0.623153 | 51 | -3.244205173 | 0.125307 | 0.998439386 |
| RAP1GDS1           | 0.623183 | 6  | -1.180889193 | 0.014742 | 0.998439386 |
| NROB1              | 0.630391 | 7  | 1.24755119   | 0.017199 | 0.998439386 |
| FPR3               | 0.630685 | 8  | -1.330875947 | 0.019656 | 0.998439386 |
| MAPT               | 0.631984 | 9  | -1.404481119 | 0.022113 | 0.998439386 |
| ERCC3              | 0.632784 | 7  | -1.238827967 | 0.017199 | 0.998439386 |
| DGKG               | 0.633122 | 12 | 1.610236475  | 0.029484 | 0.998439386 |

|           |          |    |              |          |             |
|-----------|----------|----|--------------|----------|-------------|
| PTPRU     | 0.633435 | 13 | -1.672323502 | 0.031941 | 0.998439386 |
| SGK494    | 0.633527 | 7  | 1.236124061  | 0.017199 | 0.998439386 |
| APOB      | 0.633606 | 64 | -3.460342711 | 0.157248 | 0.998439386 |
| RPS6KA1   | 0.633841 | 6  | 1.144796619  | 0.014742 | 0.998439386 |
| MAS1L     | 0.633924 | 7  | -1.234676773 | 0.017199 | 0.998439386 |
| PTPRD     | 0.635169 | 25 | -2.271855182 | 0.061425 | 0.998439386 |
| MINK1     | 0.636097 | 7  | -1.226772664 | 0.017199 | 0.998439386 |
| RASGRF2   | 0.636768 | 12 | 1.592979533  | 0.029484 | 0.998439386 |
| TRAF2     | 0.637339 | 13 | -1.653124798 | 0.031941 | 0.998439386 |
| MMP2      | 0.640971 | 12 | -1.573143913 | 0.029484 | 0.998439386 |
| LRRK2     | 0.641325 | 30 | -2.427446279 | 0.07371  | 0.998439386 |
| BAP1      | 0.641754 | 5  | -1.022015493 | 0.012285 | 0.998439386 |
| PAX7      | 0.641822 | 6  | 1.117941001  | 0.014742 | 0.998439386 |
| SENP6     | 0.642591 | 11 | -1.500760195 | 0.027027 | 0.998439386 |
| NUMB      | 0.642593 | 6  | -1.115354421 | 0.014742 | 0.998439386 |
| REV3L     | 0.64339  | 27 | -2.297713831 | 0.066339 | 0.998439386 |
| FZD10     | 0.646948 | 7  | -1.187478944 | 0.017199 | 0.998439386 |
| ERN1      | 0.64861  | 9  | -1.336322415 | 0.022113 | 0.998439386 |
| TNFRSF11A | 0.649301 | 9  | -1.333503814 | 0.022113 | 0.998439386 |
| TP53BP1   | 0.651378 | 10 | -1.39496505  | 0.02457  | 0.998439386 |
| MAP3K5    | 0.651543 | 6  | 1.085413523  | 0.014742 | 0.998439386 |
| CA9       | 0.651817 | 6  | -1.084500519 | 0.014742 | 0.998439386 |
| TMPRSS6   | 0.652228 | 14 | 1.637920416  | 0.034398 | 0.998439386 |
| FBXL6     | 0.655524 | 8  | -1.234921785 | 0.019656 | 0.998439386 |
| PAX6      | 0.656279 | 5  | 0.977660764  | 0.012285 | 0.998439386 |
| P2RY10    | 0.658848 | 6  | -1.061102913 | 0.014742 | 0.998439386 |
| MICAL1    | 0.65894  | 11 | 1.427343223  | 0.027027 | 0.998439386 |
| MLL4      | 0.660387 | 29 | -2.254029995 | 0.071253 | 0.998439386 |
| ESR2      | 0.661496 | 8  | -1.212076252 | 0.019656 | 0.998439386 |
| ITSN2     | 0.661502 | 20 | -1.887387122 | 0.04914  | 0.998439386 |
| SOCS1     | 0.661939 | 8  | 1.210386517  | 0.019656 | 0.998439386 |
| UBASH3B   | 0.663888 | 7  | -1.126667729 | 0.017199 | 0.998439386 |
| ADA       | 0.664254 | 8  | -1.201555494 | 0.019656 | 0.998439386 |
| PAXIP1    | 0.664918 | 7  | 1.122989121  | 0.017199 | 0.998439386 |
| MAPK7     | 0.665867 | 8  | 1.195407717  | 0.019656 | 0.998439386 |
| ZAP70     | 0.66651  | 11 | 1.393602198  | 0.027027 | 0.998439386 |
| MAP2K1    | 0.669373 | 5  | -0.93801574  | 0.012285 | 0.998439386 |
| PCM1      | 0.669666 | 28 | 2.153281706  | 0.068796 | 0.998439386 |
| CHRN4     | 0.670595 | 6  | 1.022235699  | 0.014742 | 0.998439386 |
| TSC2      | 0.67231  | 28 | 2.134976877  | 0.068796 | 0.998439386 |
| ARHGEF11  | 0.674438 | 16 | 1.62794353   | 0.039312 | 0.998439386 |
| PTEN      | 0.674634 | 12 | -1.416129201 | 0.029484 | 0.998439386 |
| CBX4      | 0.674743 | 14 | -1.525175348 | 0.034398 | 0.998439386 |
| WNT4      | 0.675177 | 6  | -1.007147311 | 0.014742 | 0.998439386 |
| PTPRC     | 0.675945 | 20 | -1.801877445 | 0.04914  | 0.998439386 |
| DDX11     | 0.677012 | 11 | 1.347038873  | 0.027027 | 0.998439386 |

|          |          |    |              |          |             |
|----------|----------|----|--------------|----------|-------------|
| KEAP1    | 0.677036 | 5  | 0.914954644  | 0.012285 | 0.998439386 |
| TPO      | 0.68048  | 17 | 1.642961405  | 0.041769 | 0.998439386 |
| IQGAP1   | 0.680493 | 12 | -1.389123226 | 0.029484 | 0.998439386 |
| LPHN3    | 0.681043 | 24 | -1.930921029 | 0.058968 | 0.998439386 |
| ULK1     | 0.681235 | 20 | 1.770730836  | 0.04914  | 0.998439386 |
| TGFB1    | 0.682069 | 8  | 1.133994208  | 0.019656 | 0.998439386 |
| PKMYT1   | 0.682785 | 5  | -0.897720121 | 0.012285 | 0.998439386 |
| PFKFB3   | 0.683163 | 9  | 1.196899814  | 0.022113 | 0.998439386 |
| STON2    | 0.683401 | 14 | 1.482215761  | 0.034398 | 0.998439386 |
| MLLT6    | 0.685615 | 15 | -1.520961463 | 0.036855 | 0.998439386 |
| LGR5     | 0.685765 | 15 | -1.520194327 | 0.036855 | 0.998439386 |
| KIT      | 0.688411 | 16 | -1.554107446 | 0.039312 | 0.998439386 |
| PIK3C3   | 0.688514 | 7  | -1.039347166 | 0.017199 | 0.998439386 |
| CXorf30  | 0.690884 | 11 | 1.285954475  | 0.027027 | 0.998439386 |
| CTNN     | 0.692766 | 37 | -2.265106962 | 0.090909 | 0.998439386 |
| FOXO1    | 0.693944 | 11 | -1.272543086 | 0.027027 | 0.998439386 |
| NF1      | 0.69583  | 15 | -1.468895294 | 0.036855 | 0.998439386 |
| STK36    | 0.697237 | 14 | -1.413981843 | 0.034398 | 0.998439386 |
| NUP214   | 0.697355 | 18 | -1.594469227 | 0.044226 | 0.998439386 |
| TLR2     | 0.701199 | 11 | 1.240831774  | 0.027027 | 0.998439386 |
| ATG9B    | 0.70156  | 8  | -1.060839631 | 0.019656 | 0.998439386 |
| NUAK1    | 0.70207  | 9  | 1.121763778  | 0.022113 | 0.998439386 |
| WRN      | 0.704964 | 10 | -1.168914222 | 0.02457  | 0.998439386 |
| CCNE1    | 0.705963 | 6  | 0.906755142  | 0.014742 | 0.998439386 |
| NLRP5    | 0.706892 | 28 | -1.898015514 | 0.068796 | 0.998439386 |
| ADAM29   | 0.707165 | 19 | 1.580411759  | 0.046683 | 0.998439386 |
| SMG1     | 0.708289 | 23 | -1.72288242  | 0.056511 | 0.998439386 |
| WWP2     | 0.710237 | 5  | 0.816161145  | 0.012285 | 0.998439386 |
| NLRP1    | 0.712326 | 16 | -1.429012181 | 0.039312 | 0.998439386 |
| RFX2     | 0.715119 | 21 | -1.610122284 | 0.051597 | 0.998439386 |
| CCNA1    | 0.715899 | 5  | 0.799482941  | 0.012285 | 0.998439386 |
| HNF1A    | 0.71754  | 8  | -1.001412917 | 0.019656 | 0.998439386 |
| BMPR2    | 0.717762 | 9  | -1.059957334 | 0.022113 | 0.998439386 |
| MDC1     | 0.718651 | 10 | -1.112214563 | 0.02457  | 0.998439386 |
| SMYD2    | 0.722143 | 6  | 0.854633188  | 0.014742 | 0.998439386 |
| PTPN5    | 0.722196 | 10 | 1.097590676  | 0.02457  | 0.998439386 |
| NIPBL    | 0.723683 | 18 | 1.449523251  | 0.044226 | 0.998439386 |
| PTPN3    | 0.724281 | 14 | -1.282017655 | 0.034398 | 0.998439386 |
| MYH1     | 0.725363 | 27 | 1.743523364  | 0.066339 | 0.998439386 |
| MSH4     | 0.72548  | 7  | 0.910414322  | 0.017199 | 0.998439386 |
| POLQ     | 0.725593 | 30 | 1.828969106  | 0.07371  | 0.998439386 |
| PARP4    | 0.726815 | 28 | 1.763410054  | 0.068796 | 0.998439386 |
| KIAA0182 | 0.726874 | 11 | -1.129537735 | 0.027027 | 0.998439386 |
| ENPP2    | 0.7272   | 9  | -1.023010711 | 0.022113 | 0.998439386 |
| ATRX     | 0.727638 | 19 | -1.465150163 | 0.046683 | 0.998439386 |
| RFC1     | 0.727808 | 13 | -1.220470264 | 0.031941 | 0.998439386 |

|          |          |     |              |          |             |
|----------|----------|-----|--------------|----------|-------------|
| ALOX12B  | 0.730368 | 6   | -0.828291753 | 0.014742 | 0.998439386 |
| C9orf96  | 0.730953 | 9   | -1.008364549 | 0.022113 | 0.998439386 |
| EPHA10   | 0.731101 | 15  | -1.29120472  | 0.036855 | 0.998439386 |
| KCNH8    | 0.731819 | 12  | 1.156078219  | 0.029484 | 0.998439386 |
| FOXM1    | 0.732385 | 5   | 0.751177213  | 0.012285 | 0.998439386 |
| REV1     | 0.733714 | 11  | -1.100116895 | 0.027027 | 0.998439386 |
| HGF      | 0.733748 | 12  | -1.147434495 | 0.029484 | 0.998439386 |
| PGR      | 0.734308 | 15  | 1.275192883  | 0.036855 | 0.998439386 |
| CHRNA3   | 0.735077 | 7   | -0.877319553 | 0.017199 | 0.998439386 |
| RELB     | 0.735752 | 7   | 0.874998703  | 0.017199 | 0.998439386 |
| CHD8     | 0.737568 | 21  | -1.478156419 | 0.051597 | 0.998439386 |
| CCR3     | 0.739239 | 11  | 1.076420348  | 0.027027 | 0.998439386 |
| FANCD2   | 0.740074 | 9   | -0.972871267 | 0.022113 | 0.998439386 |
| NTRK2    | 0.74151  | 6   | -0.792765901 | 0.014742 | 0.998439386 |
| FAM46A   | 0.741866 | 7   | -0.853996704 | 0.017199 | 0.998439386 |
| IRS1     | 0.742265 | 14  | -1.195201422 | 0.034398 | 0.998439386 |
| PRKCG    | 0.745452 | 8   | 0.898691759  | 0.019656 | 0.998439386 |
| DIP2C    | 0.75181  | 11  | 1.022716723  | 0.027027 | 0.998439386 |
| PRKAG2   | 0.754211 | 6   | 0.752478399  | 0.014742 | 0.998439386 |
| GAB1     | 0.75426  | 7   | 0.81158786   | 0.017199 | 0.998439386 |
| PTK2     | 0.756696 | 9   | 0.908552518  | 0.022113 | 0.998439386 |
| ITGB2    | 0.756909 | 10  | -0.955632583 | 0.02457  | 0.998439386 |
| ZNF384   | 0.757137 | 7   | -0.80177784  | 0.017199 | 0.998439386 |
| TGFB3    | 0.757153 | 6   | 0.743178462  | 0.014742 | 0.998439386 |
| wnt      | 0.758089 | 29  | 1.580004613  | 0.071253 | 0.998439386 |
| ARHGAP26 | 0.760725 | 5   | 0.668961839  | 0.012285 | 0.998439386 |
| ADAMTSL3 | 0.761135 | 36  | 1.721370448  | 0.088452 | 0.998439386 |
| JAK2     | 0.76232  | 12  | -1.020228454 | 0.029484 | 0.998439386 |
| RIPK1    | 0.76513  | 8   | 0.827019326  | 0.019656 | 0.998439386 |
| ROR1     | 0.765369 | 9   | 0.875168461  | 0.022113 | 0.998439386 |
| CTNNA1   | 0.76548  | 8   | 0.825750294  | 0.019656 | 0.998439386 |
| WNT10B   | 0.765934 | 8   | 0.824104523  | 0.019656 | 0.998439386 |
| ATG2B    | 0.76694  | 25  | -1.419142489 | 0.061425 | 0.998439386 |
| CBL      | 0.767043 | 11  | 0.958011073  | 0.027027 | 0.998439386 |
| HEYL     | 0.768442 | 5   | -0.646740921 | 0.012285 | 0.998439386 |
| HIF1A    | 0.771297 | 7   | 0.753647394  | 0.017199 | 0.998439386 |
| MARK1    | 0.771562 | 12  | 0.979400215  | 0.029484 | 0.998439386 |
| IGF1     | 0.771802 | 8   | -0.802844612 | 0.019656 | 0.998439386 |
| MLH3     | 0.772628 | 14  | -1.050124627 | 0.034398 | 0.998439386 |
| WNT2     | 0.774048 | 5   | 0.630642086  | 0.012285 | 0.998439386 |
| LEF1     | 0.774056 | 6   | -0.689946883 | 0.014742 | 0.998439386 |
| TMEM161A | 0.774869 | 9   | 0.838729984  | 0.022113 | 0.998439386 |
| GRM8     | 0.775059 | 17  | -1.140090083 | 0.041769 | 0.998439386 |
| UBR5     | 0.775589 | 11  | 0.921879278  | 0.027027 | 0.998439386 |
| SYNE1    | 0.775862 | 117 | 2.569676512  | 0.287469 | 0.998439386 |
| ITPR3    | 0.776378 | 22  | 1.280853355  | 0.054054 | 0.998439386 |

|          |          |     |              |          |             |
|----------|----------|-----|--------------|----------|-------------|
| ERCC6    | 0.77667  | 25  | 1.358242219  | 0.061425 | 0.998439386 |
| GPC5     | 0.777088 | 10  | -0.874048029 | 0.02457  | 0.998439386 |
| ADCY1    | 0.777317 | 12  | -0.954045812 | 0.029484 | 0.998439386 |
| SIX4     | 0.777333 | 5   | -0.621223084 | 0.012285 | 0.998439386 |
| ABCC2    | 0.783668 | 24  | 1.289703194  | 0.058968 | 0.998439386 |
| ERG      | 0.783823 | 5   | -0.602646045 | 0.012285 | 0.998439386 |
| USP34    | 0.78431  | 21  | -1.207435732 | 0.051597 | 0.998439386 |
| ETV6     | 0.785367 | 7   | -0.70607825  | 0.017199 | 0.998439386 |
| SETD2    | 0.786249 | 22  | -1.222874335 | 0.054054 | 0.998439386 |
| GSTP1    | 0.790484 | 6   | 0.638534551  | 0.014742 | 0.998439386 |
| USP42    | 0.794365 | 17  | 1.039883498  | 0.041769 | 0.998439386 |
| ITGA9    | 0.795402 | 7   | 0.672297185  | 0.017199 | 0.998439386 |
| HEY2     | 0.79573  | 6   | -0.622181387 | 0.014742 | 0.998439386 |
| MET      | 0.79653  | 15  | -0.968758466 | 0.036855 | 0.998439386 |
| MYO1B    | 0.797886 | 10  | -0.79059424  | 0.02457  | 0.998439386 |
| PHLPP1   | 0.799427 | 9   | 0.745116555  | 0.022113 | 0.998439386 |
| SORL1    | 0.800821 | 18  | -1.034371741 | 0.044226 | 0.998439386 |
| MAP3K14  | 0.801114 | 11  | -0.814624042 | 0.027027 | 0.998439386 |
| COL14A1  | 0.802124 | 27  | -1.243735499 | 0.066339 | 0.998439386 |
| ARHGAP29 | 0.80268  | 5   | -0.548914395 | 0.012285 | 0.998439386 |
| JAK1     | 0.804305 | 5   | -0.544300575 | 0.012285 | 0.998439386 |
| PAK1     | 0.805757 | 5   | -0.540179801 | 0.012285 | 0.998439386 |
| CDC42BPB | 0.808778 | 12  | 0.816366248  | 0.029484 | 0.998439386 |
| CA12     | 0.809061 | 6   | -0.580746865 | 0.014742 | 0.998439386 |
| STK33    | 0.810057 | 6   | 0.577658486  | 0.014742 | 0.998439386 |
| PER1     | 0.810214 | 14  | 0.87280652   | 0.034398 | 0.998439386 |
| ADHFE1   | 0.812183 | 11  | 0.768394958  | 0.027027 | 0.998439386 |
| PAG1     | 0.812805 | 6   | 0.569143795  | 0.014742 | 0.998439386 |
| IKBKE    | 0.813559 | 5   | 0.518066114  | 0.012285 | 0.998439386 |
| MUC4     | 0.813825 | 200 | -2.347767359 | 0.4914   | 0.998439386 |
| MAP3K8   | 0.815263 | 6   | 0.561530495  | 0.014742 | 0.998439386 |
| CIC      | 0.816225 | 9   | 0.68152271   | 0.022113 | 0.998439386 |
| PIK3CG   | 0.816322 | 19  | 0.977180702  | 0.046683 | 0.998439386 |
| PAK4     | 0.818102 | 7   | -0.596290554 | 0.017199 | 0.998439386 |
| NOTCH3   | 0.818478 | 29  | -1.177357063 | 0.071253 | 0.998439386 |
| NPY2R    | 0.819211 | 6   | 0.549316366  | 0.014742 | 0.998439386 |
| RING1    | 0.819889 | 5   | -0.500164963 | 0.012285 | 0.998439386 |
| COL7A1   | 0.820903 | 37  | -1.297841603 | 0.090909 | 0.998439386 |
| F2RL2    | 0.820944 | 5   | -0.497184757 | 0.012285 | 0.998439386 |
| UBA1     | 0.821581 | 6   | 0.541992193  | 0.014742 | 0.998439386 |
| USP28    | 0.824523 | 13  | 0.777540086  | 0.031941 | 0.998439386 |
| MLL3     | 0.824549 | 40  | -1.316132213 | 0.09828  | 0.998439386 |
| ZEB1     | 0.824991 | 11  | 0.715099717  | 0.027027 | 0.998439386 |
| HIP1     | 0.825262 | 10  | -0.68160919  | 0.02457  | 0.998439386 |
| PRKD1    | 0.825378 | 10  | -0.681147815 | 0.02457  | 0.998439386 |
| CDC7     | 0.8278   | 6   | 0.522792158  | 0.014742 | 0.998439386 |

|          |          |     |              |          |             |
|----------|----------|-----|--------------|----------|-------------|
| DCC      | 0.828016 | 18  | -0.890716216 | 0.044226 | 0.998439386 |
| RFC5     | 0.829925 | 5   | -0.471849507 | 0.012285 | 0.998439386 |
| ANO1     | 0.830187 | 9   | 0.628907336  | 0.022113 | 0.998439386 |
| EPHA6    | 0.831245 | 16  | -0.825881813 | 0.039312 | 0.998439386 |
| NLRP3    | 0.832347 | 11  | -0.684578926 | 0.027027 | 0.998439386 |
| KDM5C    | 0.832811 | 9   | -0.619043362 | 0.022113 | 0.998439386 |
| PAK7     | 0.835335 | 11  | 0.672199868  | 0.027027 | 0.998439386 |
| RET      | 0.835885 | 16  | -0.802840522 | 0.039312 | 0.998439386 |
| FANCM    | 0.838371 | 22  | -0.919809885 | 0.054054 | 0.998439386 |
| TAL1     | 0.839109 | 6   | -0.487967759 | 0.014742 | 0.998439386 |
| TMEM132B | 0.840018 | 18  | -0.827671217 | 0.044226 | 0.998439386 |
| FN1      | 0.840815 | 30  | -1.046598997 | 0.07371  | 0.998439386 |
| TRIM47   | 0.841851 | 9   | 0.585111538  | 0.022113 | 0.998439386 |
| TIAM1    | 0.841893 | 28  | 1.006829213  | 0.068796 | 0.998439386 |
| POLN     | 0.842444 | 6   | -0.477716802 | 0.014742 | 0.998439386 |
| MELK     | 0.844678 | 7   | -0.507947609 | 0.017199 | 0.998439386 |
| MAN1B1   | 0.844845 | 13  | 0.686256114  | 0.031941 | 0.998439386 |
| IKBIP    | 0.845358 | 7   | 0.505694595  | 0.017199 | 0.998439386 |
| SLC17A5  | 0.84761  | 7   | -0.498236389 | 0.017199 | 0.998439386 |
| N4BP2    | 0.847702 | 14  | -0.697995384 | 0.034398 | 0.998439386 |
| ETS1     | 0.848154 | 8   | 0.53004957   | 0.019656 | 0.998439386 |
| PREX2    | 0.848355 | 21  | 0.843540271  | 0.051597 | 0.998439386 |
| MGA      | 0.848393 | 22  | 0.862056703  | 0.054054 | 0.998439386 |
| TGFB2    | 0.849537 | 5   | -0.416735217 | 0.012285 | 0.998439386 |
| JUNB     | 0.850126 | 6   | -0.454138283 | 0.014742 | 0.998439386 |
| PIK3CA   | 0.850202 | 52  | -1.257279263 | 0.127764 | 0.998439386 |
| HERC6    | 0.850325 | 11  | -0.610236455 | 0.027027 | 0.998439386 |
| LYN      | 0.851852 | 5   | 0.41024883   | 0.012285 | 0.998439386 |
| CYP2C19  | 0.851932 | 7   | 0.483938931  | 0.017199 | 0.998439386 |
| MUC16    | 0.852665 | 146 | 1.776354556  | 0.358722 | 0.998439386 |
| PAX3     | 0.854524 | 9   | -0.537672809 | 0.022113 | 0.998439386 |
| RASGRF1  | 0.854635 | 16  | 0.710015908  | 0.039312 | 0.998439386 |
| EGF      | 0.855324 | 12  | 0.615066536  | 0.029484 | 0.998439386 |
| FANCA    | 0.856666 | 12  | 0.609296433  | 0.029484 | 0.998439386 |
| ROBO2    | 0.857765 | 36  | -1.014846319 | 0.088452 | 0.998439386 |
| PFKFB4   | 0.85915  | 5   | 0.389819087  | 0.012285 | 0.998439386 |
| NRG2     | 0.86061  | 8   | 0.486098678  | 0.019656 | 0.998439386 |
| DYRK2    | 0.862746 | 6   | 0.415496763  | 0.014742 | 0.998439386 |
| AKAP9    | 0.864885 | 28  | 0.85887312   | 0.068796 | 0.998439386 |
| EPHB4    | 0.869818 | 8   | 0.453687744  | 0.019656 | 0.998439386 |
| TAF1L    | 0.871243 | 38  | -0.940388564 | 0.093366 | 0.998439386 |
| AKT3     | 0.872033 | 5   | -0.353838643 | 0.012285 | 0.998439386 |
| MKRN3    | 0.8761   | 14  | 0.566659517  | 0.034398 | 0.998439386 |
| RUNX1T1  | 0.876351 | 10  | -0.480362908 | 0.02457  | 0.998439386 |
| CDC42BPA | 0.877242 | 17  | 0.616262886  | 0.041769 | 0.998439386 |
| HSP90AA1 | 0.877243 | 8   | 0.427600394  | 0.019656 | 0.998439386 |

|           |          |    |              |          |             |
|-----------|----------|----|--------------|----------|-------------|
| ROBO1     | 0.877847 | 27 | -0.762818725 | 0.066339 | 0.998439386 |
| ADAMTS18  | 0.878147 | 31 | -0.811044113 | 0.076167 | 0.998439386 |
| DDX10     | 0.88023  | 10 | -0.46517982  | 0.02457  | 0.998439386 |
| BLM       | 0.880745 | 20 | 0.6467084    | 0.04914  | 0.998439386 |
| CLSPN     | 0.882786 | 21 | -0.650413049 | 0.051597 | 0.998439386 |
| EP300     | 0.882791 | 29 | -0.756332907 | 0.071253 | 0.998439386 |
| DIS3      | 0.884113 | 8  | 0.40349289   | 0.019656 | 0.998439386 |
| IGFBP1    | 0.886329 | 6  | -0.343564239 | 0.014742 | 0.998439386 |
| CYP2D6    | 0.887725 | 13 | 0.495082563  | 0.031941 | 0.998439386 |
| INHBA     | 0.887753 | 6  | -0.339231502 | 0.014742 | 0.998439386 |
| ARHGEF12  | 0.887783 | 16 | 0.546864233  | 0.039312 | 0.998439386 |
| E2F1      | 0.889223 | 5  | 0.305975478  | 0.012285 | 0.998439386 |
| ERBB4     | 0.889239 | 18 | -0.570998892 | 0.044226 | 0.998439386 |
| GAB3      | 0.889416 | 5  | -0.305437686 | 0.012285 | 0.998439386 |
| IGF1R     | 0.889718 | 11 | 0.448410123  | 0.027027 | 0.998439386 |
| ADRA1A    | 0.890665 | 6  | -0.33037499  | 0.014742 | 0.998439386 |
| XRCC2     | 0.890754 | 6  | -0.330104347 | 0.014742 | 0.998439386 |
| RBL2      | 0.891174 | 11 | -0.442451533 | 0.027027 | 0.998439386 |
| AXIN1     | 0.891507 | 6  | 0.327815011  | 0.014742 | 0.998439386 |
| PTPN13    | 0.891554 | 32 | 0.731784417  | 0.078624 | 0.998439386 |
| JAG1      | 0.893755 | 13 | -0.468332132 | 0.031941 | 0.998439386 |
| MAPK8IP2  | 0.896951 | 10 | -0.399839324 | 0.02457  | 0.998439386 |
| TP63      | 0.898309 | 5  | 0.280734136  | 0.012285 | 0.998439386 |
| TCF3      | 0.898577 | 13 | -0.446955141 | 0.031941 | 0.998439386 |
| BUB1      | 0.900962 | 8  | -0.344497938 | 0.019656 | 0.998439386 |
| SMC6      | 0.900998 | 6  | -0.298981089 | 0.014742 | 0.998439386 |
| ZMYM2     | 0.901771 | 8  | -0.341669874 | 0.019656 | 0.998439386 |
| MCPH1     | 0.902826 | 17 | 0.487103895  | 0.041769 | 0.998439386 |
| UHRF1BP1L | 0.90445  | 13 | 0.420945402  | 0.031941 | 0.998439386 |
| NKD2      | 0.904576 | 10 | 0.370107332  | 0.02457  | 0.998439386 |
| KNTC1     | 0.904799 | 33 | 0.651036693  | 0.081081 | 0.998439386 |
| KSR2      | 0.906119 | 11 | -0.381384641 | 0.027027 | 0.998439386 |
| RAPGEF2   | 0.906187 | 13 | -0.413258295 | 0.031941 | 0.998439386 |
| MAG1      | 0.90665  | 16 | 0.454454519  | 0.039312 | 0.998439386 |
| SIK1      | 0.911833 | 12 | 0.373522774  | 0.029484 | 0.998439386 |
| NTRK3     | 0.912501 | 10 | -0.339238181 | 0.02457  | 0.998439386 |
| PTPN1     | 0.912645 | 6  | -0.26365919  | 0.014742 | 0.998439386 |
| BAI1      | 0.913145 | 13 | -0.382481743 | 0.031941 | 0.998439386 |
| PIK3C2A   | 0.913792 | 18 | 0.44385553   | 0.044226 | 0.998439386 |
| CTDP1     | 0.915986 | 8  | 0.29202648   | 0.019656 | 0.998439386 |
| BCL11A    | 0.916457 | 6  | 0.252110382  | 0.014742 | 0.998439386 |
| NMUR2     | 0.921057 | 5  | 0.217698977  | 0.012285 | 0.998439386 |
| LRP1B     | 0.922037 | 72 | -0.744737537 | 0.176904 | 0.998439386 |
| MLL       | 0.922537 | 19 | -0.409079506 | 0.046683 | 0.998439386 |
| PAX5      | 0.923077 | 5  | -0.212112522 | 0.012285 | 0.998439386 |
| CDH5      | 0.924065 | 11 | -0.308232419 | 0.027027 | 0.998439386 |



|          |          |    |              |          |             |
|----------|----------|----|--------------|----------|-------------|
| NOTCH2   | 0.924386 | 17 | -0.378657201 | 0.041769 | 0.998439386 |
| RGL1     | 0.924885 | 8  | 0.260997486  | 0.019656 | 0.998439386 |
| MSH6     | 0.925826 | 19 | -0.391655933 | 0.046683 | 0.998439386 |
| TLR3     | 0.930474 | 7  | 0.226210973  | 0.017199 | 0.998439386 |
| VRTN     | 0.931648 | 17 | 0.342195901  | 0.041769 | 0.998439386 |
| PAK3     | 0.932617 | 5  | -0.185738708 | 0.012285 | 0.998439386 |
| PTK2B    | 0.933587 | 6  | 0.200281734  | 0.014742 | 0.998439386 |
| ADAM17   | 0.933885 | 5  | 0.182234397  | 0.012285 | 0.998439386 |
| SOS2     | 0.937614 | 8  | 0.216668687  | 0.019656 | 0.998439386 |
| RALGAPA1 | 0.938773 | 9  | -0.22525328  | 0.022113 | 0.998439386 |
| ABL2     | 0.940582 | 7  | -0.193257851 | 0.017199 | 0.998439386 |
| SLCO1B3  | 0.940926 | 14 | 0.269334857  | 0.034398 | 0.998439386 |
| LATS2    | 0.94166  | 18 | 0.300056754  | 0.044226 | 0.998439386 |
| MPL      | 0.942202 | 6  | 0.174250318  | 0.014742 | 0.998439386 |
| USP43    | 0.943161 | 6  | 0.171354216  | 0.014742 | 0.998439386 |
| ADAM33   | 0.94436  | 9  | 0.204661851  | 0.022113 | 0.998439386 |
| CRHR1    | 0.944395 | 7  | -0.180835349 | 0.017199 | 0.998439386 |
| PTCH2    | 0.945169 | 15 | 0.258400394  | 0.036855 | 0.998439386 |
| CD22     | 0.946277 | 12 | -0.227305946 | 0.029484 | 0.998439386 |
| ABCA1    | 0.94633  | 18 | 0.275999091  | 0.044226 | 0.998439386 |
| MERTK    | 0.946652 | 7  | -0.173483902 | 0.017199 | 0.998439386 |
| FURIN    | 0.947429 | 6  | -0.158469089 | 0.014742 | 0.998439386 |
| ETV1     | 0.947921 | 6  | -0.156982049 | 0.014742 | 0.998439386 |
| ALK      | 0.947936 | 14 | 0.237324353  | 0.034398 | 0.998439386 |
| WNK2     | 0.949794 | 13 | -0.220800188 | 0.031941 | 0.998439386 |
| EPHB3    | 0.952279 | 11 | 0.193531237  | 0.027027 | 0.998439386 |
| TYK2     | 0.952822 | 14 | -0.215025897 | 0.034398 | 0.998439386 |
| LDHB     | 0.953169 | 6  | 0.14114473   | 0.014742 | 0.998439386 |
| SGK1     | 0.954203 | 5  | 0.126155301  | 0.012285 | 0.998439386 |
| CSMD3    | 0.955339 | 57 | -0.387579219 | 0.140049 | 0.998439386 |
| HIPK2    | 0.958031 | 15 | 0.197720846  | 0.036855 | 0.998439386 |
| SMARCA4  | 0.960089 | 13 | 0.175481285  | 0.031941 | 0.998439386 |
| SMARC    | 0.960089 | 13 | 0.175481285  | 0.031941 | 0.998439386 |
| RNF213   | 0.960979 | 37 | 0.280485171  | 0.090909 | 0.998439386 |
| IKKB     | 0.964225 | 8  | 0.124161148  | 0.019656 | 0.998439386 |
| PHF14    | 0.965976 | 10 | -0.131687223 | 0.02457  | 0.998439386 |
| CHRNA5   | 0.967183 | 5  | -0.090376637 | 0.012285 | 0.998439386 |
| PES1     | 0.971501 | 14 | 0.129843455  | 0.034398 | 0.998439386 |
| ETS2     | 0.971619 | 6  | -0.085505625 | 0.014742 | 0.998439386 |
| FER      | 0.975008 | 8  | 0.086723451  | 0.019656 | 0.998439386 |
| LHCGR    | 0.985394 | 8  | -0.050679695 | 0.019656 | 0.998439386 |
| PHLPP2   | 0.986176 | 10 | 0.053490672  | 0.02457  | 0.998439386 |
| TACR3    | 0.98696  | 9  | -0.047930061 | 0.022113 | 0.998439386 |
| USP5     | 0.987949 | 5  | 0.033180088  | 0.012285 | 0.998439386 |
| PRKAG3   | 0.988262 | 9  | 0.043141703  | 0.022113 | 0.998439386 |
| PIK3C2B  | 0.988891 | 15 | 0.052312911  | 0.036855 | 0.998439386 |

|        |          |    |              |          |             |
|--------|----------|----|--------------|----------|-------------|
| EPHA2  | 0.989061 | 16 | 0.053135373  | 0.039312 | 0.998439386 |
| MAP2K7 | 0.990167 | 11 | 0.039853202  | 0.027027 | 0.998439386 |
| TRIM36 | 0.990756 | 6  | -0.027844102 | 0.014742 | 0.998439386 |
| TRAF5  | 0.990807 | 5  | -0.025310213 | 0.012285 | 0.998439386 |
| EPHA3  | 0.991756 | 12 | 0.034854499  | 0.029484 | 0.998439386 |
| BRCA2  | 0.995044 | 39 | 0.03646165   | 0.095823 | 0.998439386 |
| PIK3R2 | 0.996404 | 6  | 0.010831766  | 0.014742 | 0.998439386 |
| GUCY2F | 0.997145 | 20 | -0.01542473  | 0.04914  | 0.998439386 |
| ITPR2  | 0.997355 | 23 | 0.015264931  | 0.056511 | 0.998439386 |
| PTPN12 | 0.998439 | 7  | -0.00507119  | 0.017199 | 0.998439386 |

**Supplementary Table S13. Cochran-Mantel-Haenszel (CMH) trend test of the CTX-S scores by quartiles (4<sup>th</sup>, highest; 1<sup>st</sup>, lowest) for mutant forms of *APC* and *TP53* as well as primary tumor location**

| Cetuximab Sensitivity Scores      |          | WT <i>APC</i><br>(n=156) | <i>APC</i> 1 mut w/o<br>LOH (n=129) | <i>APC</i> 2 mut/1 mut &<br>LOH (n=183) | MUT <i>TP53</i><br>(n=277) | Left-sided<br>(n=276) |
|-----------------------------------|----------|--------------------------|-------------------------------------|-----------------------------------------|----------------------------|-----------------------|
| 4 <sup>th</sup> quartile          |          | 15 (10%)                 | <b>38 (29%)</b>                     | <b>65 (36%)</b>                         | <b>102 (37%)</b>           | <b>91 (33%)</b>       |
| 3 <sup>rd</sup> quartile          |          | 19 (12%)                 | 38 (29%)                            | 59 (32%)                                | 86 (31%)                   | 75 (27%)              |
| 2 <sup>nd</sup> quartile          |          | 49 (31%)                 | 34 (26%)                            | 35 (19%)                                | 61 (22%)                   | 58 (21%)              |
| 1 <sup>st</sup> quartile          |          | <b>73 (47%)</b>          | 19 (15%)                            | 24 (13%)                                | 28 (10%)                   | 52 (19%)              |
| CMH test<br>(nonzero correlation) | DF       | 1                        |                                     |                                         | 1                          | 1                     |
|                                   | value    | <b>72.8</b>              |                                     |                                         | <b>105.6</b>               | <b>30.5</b>           |
|                                   | <i>p</i> | <b>&lt; 0.0001</b>       |                                     |                                         | <b>&lt; 0.0001</b>         | <b>&lt; 0.0001</b>    |

**Note:** MUT – mutant; WT – wild-type; *APC* 1 mut or 2 mut – one or two *APC* truncated mutations; LOH – Loss of heterozygosity.

**Supplementary Table S14. Barnard's exact test on the frequency of “MUT APC + MUT TP53” (AP) by the MSI/MSS status in Moffitt (n=468) and TCGA (n=220) CRCs.**

**Note:** Of 221 TCGA CRCs, 1 sample without MSI status information was excluded. **A** — APC truncating mutation; **P** — TP53 mutation  
The significant *P* values are highlighted by yellow color. MUT — mutant.; **AP** — APC + TP53 doubly-mutated tumors regardless of RAS mutations status.

**A. Moffitt CRCs (n=468)**

| Table of Status by Mutation                         |          |        |       |
|-----------------------------------------------------|----------|--------|-------|
| Status                                              | Mutation |        |       |
| Frequency<br>Expected<br>Cell Chi-Square<br>Col Pct | AP       | Others | Total |
| MSI_H                                               | 2        | 59     | 61    |
|                                                     | 25.938   | 35.062 |       |
|                                                     | 22.092   | 16.343 |       |
|                                                     | 1.01     | 21.93  |       |
| MSS                                                 | 197      | 210    | 407   |
|                                                     | 173.06   | 233.94 |       |
|                                                     | 3.3111   | 2.4495 |       |
|                                                     | 98.99    | 78.07  |       |
| <b>Total</b>                                        | 199      | 269    | 468   |

| Barnard's Exact Test<br>Proportion (Risk) Difference |         |
|------------------------------------------------------|---------|
| H0: P1 - P2 = 0                                      |         |
| Proportion Difference                                | -0.4512 |
| ASE (H0)                                             | 0.0679  |
| Z                                                    | -6.6480 |
| One-sided Pr <= Z                                    | <.0001  |
| Two-sided Pr >=  Z                                   | <.0001  |

**B. TCGA CRCs (n=220)**

| <b>Table of Status by Mutation</b>                            |                               |                                 |              |
|---------------------------------------------------------------|-------------------------------|---------------------------------|--------------|
| <b>Status</b>                                                 | <b>Mutation</b>               |                                 |              |
| <b>Frequency<br/>Expected<br/>Cell Chi-Square<br/>Col Pct</b> | <b>AP</b>                     | <b>Others</b>                   | <b>Total</b> |
| <b>MSI_H</b>                                                  | 1<br>11.2<br>9.2893<br>1.14   | 27<br>16.8<br>6.1929<br>20.45   | 28           |
| <b>MSS</b>                                                    | 87<br>76.8<br>1.3547<br>98.86 | 105<br>115.2<br>0.9031<br>79.55 | 192          |
| <b>Total</b>                                                  | 88                            | 132                             | 220          |

| <b>Barnard's Exact Test<br/>Proportion (Risk) Difference</b> |               |
|--------------------------------------------------------------|---------------|
| <b>H0: P1 - P2 = 0</b>                                       |               |
| <b>Proportion Difference</b>                                 | -0.4174       |
| <b>ASE (H0)</b>                                              | 0.0991        |
| <b>Z</b>                                                     | -4.2119       |
| <b>One-sided Pr &lt;= Z</b>                                  | 0.0006        |
| <b>Two-sided Pr &gt;=  Z </b>                                | <b>0.0006</b> |

**Supplementary Table S15. Barnard's exact test or Cochran-Mantel-Haenszel trend test on the frequencies of MSI and “MUT APC + MUT TP53” (AP) by the sidedness (Left vs Right) in Moffitt CRCs (n=464).**

**Note:** Of 468 CRCs, 4 samples without tumor location information were excluded. **A** — APC truncating mutation; **P** — TP53 mutation; **K** — KRAS mutation; **N** — NRAS mutation; **B** — BRAF(V600E). In all patients **AP** represents APC + TP53 doubly-mutated tumors regardless of RAS/RAF mutation status; WT AP — APC + TP53 doubly wild-type tumors; The significant *P* values are highlighted by yellow color.

**A. All patients (Left vs. Right n=464)**

**A-1. MSI (n=464)**

| Table of position by Status                         |                                |                                  |       |
|-----------------------------------------------------|--------------------------------|----------------------------------|-------|
| position                                            | Status                         |                                  |       |
| Frequency<br>Expected<br>Cell Chi-Square<br>Col Pct | MSI                            | Others                           | Total |
| <b>Left</b>                                         | 12<br>35.89<br>15.902<br>19.67 | 261<br>237.11<br>2.4071<br>64.76 | 273   |
| <b>Right</b>                                        | 49<br>25.11<br>22.73<br>80.33  | 142<br>165.89<br>3.4404<br>35.24 | 191   |
| <b>Total</b>                                        | 61                             | 403                              | 464   |

| Barnard's Exact Test<br>Proportion (Risk) Difference |         |
|------------------------------------------------------|---------|
| H0: P1 - P2 = 0                                      |         |
| Proportion Difference                                | -0.2126 |
| ASE (H0)                                             | 0.0319  |
| Z                                                    | -6.6693 |
| One-sided Pr <= Z                                    | <.0001  |
| Two-sided Pr >=  Z                                   | <.0001  |

A-2. "AP" vs. "A or P" vs. "wtAP" (n=464)

| Table of position by Status                         |                                  |                                  |                                 |       |
|-----------------------------------------------------|----------------------------------|----------------------------------|---------------------------------|-------|
| position                                            | Status                           |                                  |                                 |       |
| Frequency<br>Expected<br>Cell Chi-Square<br>Col Pct | AP                               | A or P                           | wtAP                            | Total |
| <b>Left</b>                                         | 134<br>115.32<br>3.0262<br>68.37 | 106<br>111.79<br>0.2998<br>55.79 | 33<br>45.892<br>3.6217<br>42.31 | 273   |
| <b>Right</b>                                        | 62<br>80.681<br>4.3254<br>31.63  | 84<br>78.211<br>0.4285<br>44.21  | 45<br>32.108<br>5.1766<br>57.69 | 191   |
| <b>Total</b>                                        | 196                              | 190                              | 78                              | 464   |

| Cochran-Mantel-Haenszel Statistics (Based on Table Scores) |                        |    |         |        |
|------------------------------------------------------------|------------------------|----|---------|--------|
| Statistic                                                  | Alternative Hypothesis | DF | Value   | Prob   |
| 1                                                          | Nonzero Correlation    | 1  | 16.8332 | <.0001 |

A-3. "AP" vs. others (n=464)

| Table of position by Status                         |                                  |                                  |       |
|-----------------------------------------------------|----------------------------------|----------------------------------|-------|
| position                                            | Status                           |                                  |       |
| Frequency<br>Expected<br>Cell Chi-Square<br>Col Pct | AP                               | Others                           | Total |
| <b>Left</b>                                         | 134<br>115.32<br>3.0262<br>68.37 | 139<br>157.68<br>2.2132<br>51.87 | 273   |
| <b>Right</b>                                        | 62<br>80.681<br>4.3254<br>31.63  | 129<br>110.32<br>3.1634<br>48.13 | 191   |
| <b>Total</b>                                        | 196                              | 268                              | 464   |

| Barnard's Exact Test<br>Proportion (Risk) Difference |        |
|------------------------------------------------------|--------|
| H0: P1 - P2 = 0                                      |        |
| Proportion Difference                                | 0.1662 |
| ASE (H0)                                             | 0.0466 |
| Z                                                    | 3.5677 |
| One-sided Pr >= Z                                    | 0.0002 |
| Two-sided Pr >=  Z                                   | 0.0004 |

**B. wtRAS patients (Left vs. Right n=262)**

**B-1. MSI (n=262)**

| Table of position by Status                         |                                 |                                  |       |
|-----------------------------------------------------|---------------------------------|----------------------------------|-------|
| position                                            | Status                          |                                  |       |
| Frequency<br>Expected<br>Cell Chi-Square<br>Col Pct | MSI                             | Others                           | Total |
| <b>Left</b>                                         | 6<br>30.046<br>19.244<br>12.50  | 158<br>133.95<br>4.3164<br>73.83 | 164   |
| <b>Right</b>                                        | 42<br>17.954<br>32.204<br>87.50 | 56<br>80.046<br>7.2234<br>26.17  | 98    |
| <b>Total</b>                                        | 48                              | 214                              | 262   |

| Barnard's Exact Test<br>Proportion (Risk) Difference |         |
|------------------------------------------------------|---------|
| H0: P1 - P2 = 0                                      |         |
| Proportion Difference                                | -0.3920 |
| ASE (H0)                                             | 0.0494  |
| Z                                                    | -7.9365 |
| One-sided Pr <= Z                                    | <.0001  |
| Two-sided Pr >=  Z                                   | <.0001  |



**B-2. "AP" vs. "A or P" vs. "wtAP" (n=262)**

| Table of position by Status                         |                                 |                                 |                                 |       |
|-----------------------------------------------------|---------------------------------|---------------------------------|---------------------------------|-------|
| position                                            | Status                          |                                 |                                 |       |
| Frequency<br>Expected<br>Cell Chi-Square<br>Col Pct | AP                              | A or P                          | wtAP                            | Total |
| <b>Left</b>                                         | 85<br>66.351<br>5.2415<br>80.19 | 56<br>60.718<br>0.3665<br>57.73 | 23<br>36.931<br>5.2552<br>38.98 | 164   |
| <b>Right</b>                                        | 21<br>39.649<br>8.7715<br>19.81 | 41<br>36.282<br>0.6134<br>42.27 | 36<br>22.069<br>8.7944<br>61.02 | 98    |
| <b>Total</b>                                        | 106                             | 97                              | 59                              | 262   |

| Cochran-Mantel-Haenszel Statistics (Based on Table Scores) |                        |    |         |        |
|------------------------------------------------------------|------------------------|----|---------|--------|
| Statistic                                                  | Alternative Hypothesis | DF | Value   | Prob   |
| 1                                                          | Nonzero Correlation    | 1  | 28.8452 | <.0001 |

**B-3. "AP" vs. others (n=262)**

| Table of position by Status                         |                                 |                                 |       |
|-----------------------------------------------------|---------------------------------|---------------------------------|-------|
| position                                            | Status                          |                                 |       |
| Frequency<br>Expected<br>Cell Chi-Square<br>Col Pct | AP                              | Others                          | Total |
| <b>Left</b>                                         | 85<br>66.351<br>5.2415<br>80.19 | 79<br>97.649<br>3.5615<br>50.64 | 164   |
| <b>Right</b>                                        | 21<br>39.649<br>8.7715<br>19.81 | 77<br>58.351<br>5.9601<br>49.36 | 98    |
| <b>Total</b>                                        | 106                             | 156                             | 262   |

| Barnard's Exact Test<br>Proportion (Risk) Difference |        |
|------------------------------------------------------|--------|
| H0: P1 - P2 = 0                                      |        |
| Proportion Difference                                | 0.3040 |
| ASE (H0)                                             | 0.0627 |
| Z                                                    | 4.8513 |
| One-sided Pr >= Z                                    | <.0001 |
| Two-sided Pr >=  Z                                   | <.0001 |

C. wtRAS\_RAF patients (Left vs. Right n=209)

C-1. MSI (n=209)

| Table of position by Status                         |                                 |                                  |       |
|-----------------------------------------------------|---------------------------------|----------------------------------|-------|
| position                                            | Status                          |                                  |       |
| Frequency<br>Expected<br>Cell Chi-Square<br>Col Pct | MSI                             | Others                           | Total |
| Left                                                | 2<br>9.3923<br>5.8182<br>15.38  | 149<br>141.61<br>0.3859<br>76.02 | 151   |
| Right                                               | 11<br>3.6077<br>15.147<br>84.62 | 47<br>54.392<br>1.0047<br>23.98  | 58    |
| Total                                               | 13                              | 196                              | 209   |

| Barnard's Exact Test<br>Proportion (Risk) Difference |         |
|------------------------------------------------------|---------|
| H0: P1 - P2 = 0                                      |         |
| Proportion Difference                                | -0.1764 |
| ASE (H0)                                             | 0.0373  |
| Z                                                    | -4.7282 |
| One-sided Pr <= Z                                    | <.0001  |
| Two-sided Pr >=  Z                                   | <.0001  |

C-2. "AP" vs. "A or P" vs. "wtAP" (n=209)

| Table of position by Status                         |                                 |                                 |                                 |       |
|-----------------------------------------------------|---------------------------------|---------------------------------|---------------------------------|-------|
| position                                            | Status                          |                                 |                                 |       |
| Frequency<br>Expected<br>Cell Chi-Square<br>Col Pct | AP                              | A or P                          | wtAP                            | Total |
| <b>Left</b>                                         | 84<br>72.971<br>1.6669<br>83.17 | 48<br>53.464<br>0.5584<br>64.86 | 19<br>24.565<br>1.2605<br>55.88 | 151   |
| <b>Right</b>                                        | 17<br>28.029<br>4.3396<br>16.83 | 26<br>20.536<br>1.4539<br>35.14 | 15<br>9.4354<br>3.2818<br>44.12 | 58    |
| <b>Total</b>                                        | 101                             | 74                              | 34                              | 209   |

| Cochran-Mantel-Haenszel Statistics (Based on Table Scores) |                        |    |         |        |
|------------------------------------------------------------|------------------------|----|---------|--------|
| Statistic                                                  | Alternative Hypothesis | DF | Value   | Prob   |
| 1                                                          | Nonzero Correlation    | 1  | 12.0390 | 0.0005 |

C-3. "AP" vs. others (n=209)

| Table of position by Status                         |                                 |                                 |       |
|-----------------------------------------------------|---------------------------------|---------------------------------|-------|
| position                                            | Status                          |                                 |       |
| Frequency<br>Expected<br>Cell Chi-Square<br>Col Pct | AP                              | Others                          | Total |
| <b>Left</b>                                         | 84<br>72.971<br>1.6669<br>83.17 | 67<br>78.029<br>1.5588<br>62.04 | 151   |
| <b>Right</b>                                        | 17<br>28.029<br>4.3396<br>16.83 | 41<br>29.971<br>4.0583<br>37.96 | 58    |
| <b>Total</b>                                        | 101                             | 108                             | 209   |

| Barnard's Exact Test<br>Proportion (Risk) Difference |        |
|------------------------------------------------------|--------|
| H0: P1 - P2 = 0                                      |        |
| Proportion Difference                                | 0.2632 |
| ASE (H0)                                             | 0.0772 |
| Z                                                    | 3.4093 |
| One-sided Pr >= Z                                    | 0.0012 |
| Two-sided Pr >=  Z                                   | 0.0012 |

D. MSI vs. 6 MSS subgroups (Left vs. Right n=464)

| Table of position by Status                         |                                |                                 |                                 |                                 |                                 |                                |                                 |       |
|-----------------------------------------------------|--------------------------------|---------------------------------|---------------------------------|---------------------------------|---------------------------------|--------------------------------|---------------------------------|-------|
| position                                            | Status                         |                                 |                                 |                                 |                                 |                                |                                 |       |
| Frequency<br>Expected<br>Cell Chi-Square<br>Col Pct | MSI                            | APKN                            | AK_PK                           | KN_BRAF                         | AP                              | A_P                            | wtAP                            | Total |
| <b>Left</b>                                         | 12<br>35.89<br>15.902<br>19.67 | 48<br>52.364<br>0.3637<br>53.93 | 46<br>50.011<br>0.3217<br>54.12 | 18<br>19.416<br>0.1033<br>54.55 | 84<br>59.425<br>10.163<br>83.17 | 46<br>39.42<br>1.0982<br>68.66 | 19<br>16.474<br>0.3873<br>67.86 | 273   |
| <b>Right</b>                                        | 49<br>25.11<br>22.73<br>80.33  | 41<br>36.636<br>0.5199<br>46.07 | 39<br>34.989<br>0.4598<br>45.88 | 15<br>13.584<br>0.1476<br>45.45 | 17<br>41.575<br>14.527<br>16.83 | 21<br>27.58<br>1.5697<br>31.34 | 9<br>11.526<br>0.5535<br>32.14  | 191   |
| <b>Total</b>                                        | 61                             | 89                              | 85                              | 33                              | 101                             | 67                             | 28                              | 464   |

| Cochran-Mantel-Haenszel Statistics (Based on Table Scores) |                        |    |         |        |
|------------------------------------------------------------|------------------------|----|---------|--------|
| Statistic                                                  | Alternative Hypothesis | DF | Value   | Prob   |
| 1                                                          | Nonzero Correlation    | 1  | 43.9853 | <.0001 |

**E. Stage IV patients (Left vs. Right n=107)**

**E-1. MSI (n=107)**

| <b>Table of position by Status</b>                            |                                |                                 |              |
|---------------------------------------------------------------|--------------------------------|---------------------------------|--------------|
| <b>position</b>                                               | <b>Status</b>                  |                                 |              |
| <b>Frequency<br/>Expected<br/>Cell Chi-Square<br/>Col Pct</b> | <b>MSI</b>                     | <b>Others</b>                   | <b>Total</b> |
| <b>Left</b>                                                   | 2<br>3.5327<br>0.665<br>33.33  | 61<br>59.467<br>0.0395<br>60.40 | 63           |
| <b>Right</b>                                                  | 4<br>2.4673<br>0.9521<br>66.67 | 40<br>41.533<br>0.0566<br>39.60 | 44           |
| <b>Total</b>                                                  | 6                              | 101                             | 107          |

| <b>Barnard's Exact Test<br/>Proportion (Risk) Difference</b> |         |
|--------------------------------------------------------------|---------|
| <b>H0: P1 - P2 = 0</b>                                       |         |
| <b>Proportion Difference</b>                                 | -0.0592 |
| <b>ASE (H0)</b>                                              | 0.0452  |
| <b>Z</b>                                                     | -1.3089 |
| <b>One-sided Pr &lt;= Z</b>                                  | 0.1204  |
| <b>Two-sided Pr &gt;=  Z </b>                                | 0.2116  |

**E-2. "AP" vs. others (n=107)**

| <b>Table of position by Status</b>                            |                                 |                                 |              |
|---------------------------------------------------------------|---------------------------------|---------------------------------|--------------|
| <b>position</b>                                               | <b>Status</b>                   |                                 |              |
| <b>Frequency<br/>Expected<br/>Cell Chi-Square<br/>Col Pct</b> | <b>AP</b>                       | <b>Others</b>                   | <b>Total</b> |
| <b>Left</b>                                                   | 33<br>29.439<br>0.4307<br>66.00 | 30<br>33.561<br>0.3778<br>52.63 | 63           |
| <b>Right</b>                                                  | 17<br>20.561<br>0.6167<br>34.00 | 27<br>23.439<br>0.5409<br>47.37 | 44           |
| <b>Total</b>                                                  | 50                              | 57                              | 107          |

| <b>Barnard's Exact Test<br/>Proportion (Risk) Difference</b> |        |
|--------------------------------------------------------------|--------|
| <b>H0: P1 - P2 = 0</b>                                       |        |
| <b>Proportion Difference</b>                                 | 0.1374 |
| <b>ASE (H0)</b>                                              | 0.0980 |
| <b>Z</b>                                                     | 1.4022 |
| <b>One-sided Pr &gt;= Z</b>                                  | 0.1028 |
| <b>Two-sided Pr &gt;=  Z </b>                                | 0.1921 |

**Supplementary Table S16. Cochran-Mantel-Haenszel test or Barnard test on the frequencies of MSI and “mutAPC + mutTP53” (AP) by the sidedness (Left vs Right) in TCGA CRCs (n=217).**

**Note:** Of 221 CRCs, 3 samples without tumor location information and 1 sample with MSI status information were excluded. A — APC truncating mutation; P — TP53 mutation; K — KRAS mutation; N — NRAS mutation; B — BRAF(V600E). AP represents APC + TP53 doubly-mutated tumors regardless of RAS/RAF mutation status; WT AP — APC + TP53 doubly wild-type tumors; The significant P values are highlighted by yellow color.

**A. All patients (Left vs. Right n=217)**

**A-1. MSI (n=217)**

| Table of position by Status                         |                                |                                  |       |
|-----------------------------------------------------|--------------------------------|----------------------------------|-------|
| position                                            | Status                         |                                  |       |
| Frequency<br>Expected<br>Cell Chi-Square<br>Col Pct | MSI                            | others                           | Total |
| <b>Left</b>                                         | 1<br>17.419<br>15.477<br>3.70  | 139<br>122.58<br>2.1993<br>73.16 | 140   |
| <b>Right</b>                                        | 26<br>9.5806<br>28.14<br>96.30 | 51<br>67.419<br>3.9988<br>26.84  | 77    |
| <b>Total</b>                                        | 27                             | 190                              | 217   |

| Barnard's Exact Test<br>Proportion (Risk) Difference |         |
|------------------------------------------------------|---------|
| H0: P1 - P2 = 0                                      |         |
| Proportion Difference                                | -0.3305 |
| ASE (H0)                                             | 0.0468  |
| Z                                                    | -7.0579 |
| One-sided Pr <= Z                                    | <.0001  |
| Two-sided Pr >=  Z                                   | <.0001  |

A-2. "AP" vs. others (n=217)

| Table of position by Status                         |                                |                                 |       |
|-----------------------------------------------------|--------------------------------|---------------------------------|-------|
| position                                            | Status                         |                                 |       |
| Frequency<br>Expected<br>Cell Chi-Square<br>Col Pct | AP                             | Others                          | Total |
| <b>Left</b>                                         | 73<br>56.129<br>5.071<br>83.91 | 67<br>83.871<br>3.3937<br>51.54 | 140   |
| <b>Right</b>                                        | 14<br>30.871<br>9.22<br>16.09  | 63<br>46.129<br>6.1703<br>48.46 | 77    |
| <b>Total</b>                                        | 87                             | 130                             | 217   |

| Barnard's Exact Test<br>Proportion (Risk) Difference |        |
|------------------------------------------------------|--------|
| H0: P1 - P2 = 0                                      |        |
| Proportion Difference                                | 0.3396 |
| ASE (H0)                                             | 0.0695 |
| Z                                                    | 4.8841 |
| One-sided Pr >= Z                                    | <.0001 |
| Two-sided Pr >=  Z                                   | <.0001 |

B. wtRAS patients (Left vs. Right n=111)

B-1. MSI (n=111)

| Table of position by Status                         |                                  |                                 |       |
|-----------------------------------------------------|----------------------------------|---------------------------------|-------|
| position                                            | Status                           |                                 |       |
| Frequency<br>Expected<br>Cell Chi-Square<br>Col Pct | MSI                              | Others                          | Total |
| <b>Left</b>                                         | 0<br>13.333<br>13.333<br>0.00    | 74<br>60.667<br>2.9304<br>81.32 | 74    |
| <b>Right</b>                                        | 20<br>6.6667<br>26.667<br>100.00 | 17<br>30.333<br>5.8608<br>18.68 | 37    |
| <b>Total</b>                                        | 20                               | 91                              | 111   |



| <b>Barnard's Exact Test<br/>Proportion (Risk) Difference</b> |         |
|--------------------------------------------------------------|---------|
| <b>H0: P1 - P2 = 0</b>                                       |         |
| <b>Proportion Difference</b>                                 | -0.5405 |
| <b>ASE (H0)</b>                                              | 0.0774  |
| <b>Z</b>                                                     | -6.9851 |
| <b>One-sided Pr &lt;= Z</b>                                  | <.0001  |
| <b>Two-sided Pr &gt;=  Z </b>                                | <.0001  |

**B-2. "AP" vs. others (n=111)**

| <b>Table of position by Status</b>                            |                            |                             |              |
|---------------------------------------------------------------|----------------------------|-----------------------------|--------------|
| <b>position</b>                                               | <b>Status</b>              |                             |              |
| <b>Frequency<br/>Expected<br/>Cell Chi-Square<br/>Col Pct</b> | <b>AP</b>                  | <b>Others</b>               | <b>Total</b> |
| <b>Left</b>                                                   | 42<br>32<br>3.125<br>87.50 | 32<br>42<br>2.381<br>50.79  | 74           |
| <b>Right</b>                                                  | 6<br>16<br>6.25<br>12.50   | 31<br>21<br>4.7619<br>49.21 | 37           |
| <b>Total</b>                                                  | 48                         | 63                          | 111          |

| <b>Barnard's Exact Test<br/>Proportion (Risk) Difference</b> |        |
|--------------------------------------------------------------|--------|
| <b>H0: P1 - P2 = 0</b>                                       |        |
| <b>Proportion Difference</b>                                 | 0.4054 |
| <b>ASE (H0)</b>                                              | 0.0997 |
| <b>Z</b>                                                     | 4.0642 |
| <b>One-sided Pr &gt;= Z</b>                                  | <.0001 |
| <b>Two-sided Pr &gt;=  Z </b>                                | <.0001 |

C. wtRAS\_RAF patients (Left vs. Right n=93)

C-1. MSI (n=93)

| Table of position by Status                         |                                 |                                 |       |
|-----------------------------------------------------|---------------------------------|---------------------------------|-------|
| position                                            | Status                          |                                 |       |
| Frequency<br>Expected<br>Cell Chi-Square<br>Col Pct | MSI                             | Others                          | Total |
| <b>Left</b>                                         | 0<br>5.4194<br>5.4194<br>0.00   | 72<br>66.581<br>0.4411<br>83.72 | 72    |
| <b>Right</b>                                        | 7<br>1.5806<br>18.581<br>100.00 | 14<br>19.419<br>1.5124<br>16.28 | 21    |
| <b>Total</b>                                        | 7                               | 86                              | 93    |

| Barnard's Exact Test<br>Proportion (Risk) Difference |         |
|------------------------------------------------------|---------|
| H0: P1 - P2 = 0                                      |         |
| Proportion Difference                                | -0.3333 |
| ASE (H0)                                             | 0.0654  |
| Z                                                    | -5.0945 |
| One-sided Pr <= Z                                    | <.0001  |
| Two-sided Pr >=  Z                                   | <.0001  |

C-2. "AP" vs. others (n=93)

| Table of position by Status                         |                                 |                                 |       |
|-----------------------------------------------------|---------------------------------|---------------------------------|-------|
| position                                            | Status                          |                                 |       |
| Frequency<br>Expected<br>Cell Chi-Square<br>Col Pct | AP                              | Others                          | Total |
| <b>Left</b>                                         | 42<br>36.387<br>0.8658<br>89.36 | 30<br>35.613<br>0.8846<br>65.22 | 72    |
| <b>Right</b>                                        | 5<br>10.613<br>2.9685<br>10.64  | 16<br>10.387<br>3.0331<br>34.78 | 21    |
| <b>Total</b>                                        | 47                              | 46                              | 93    |

| Barnard's Exact Test<br>Proportion (Risk) Difference |        |
|------------------------------------------------------|--------|
| H0: P1 - P2 = 0                                      |        |
| Proportion Difference                                | 0.3452 |
| ASE (H0)                                             | 0.1240 |
| Z                                                    | 2.7843 |
| One-sided Pr >= Z                                    | 0.0062 |
| Two-sided Pr >=  Z                                   | 0.0062 |

**D. MSI vs. 4 MSS subgroups (Left vs. Right n=217)**

| Table of position by Status                         |                                |                                 |                                 |                                |                                 |       |
|-----------------------------------------------------|--------------------------------|---------------------------------|---------------------------------|--------------------------------|---------------------------------|-------|
| position                                            | Status                         |                                 |                                 |                                |                                 |       |
| Frequency<br>Expected<br>Cell Chi-Square<br>Col Pct | MSI                            | MSS_APKN                        | MSS_mRAS_RAF<br>_other          | MSS_AP                         | MSS_wRAS_RAF<br>_other          | Total |
| <b>Left</b>                                         | 1<br>17.419<br>15.477<br>3.70  | 30<br>25.161<br>0.9305<br>76.92 | 37<br>41.935<br>0.5809<br>56.92 | 42<br>30.323<br>4.497<br>89.36 | 30<br>25.161<br>0.9305<br>76.92 | 140   |
| <b>Right</b>                                        | 26<br>9.5806<br>28.14<br>96.30 | 9<br>13.839<br>1.6919<br>23.08  | 28<br>23.065<br>1.0561<br>43.08 | 5<br>16.677<br>8.1765<br>10.64 | 9<br>13.839<br>1.6919<br>23.08  | 77    |
| <b>Total</b>                                        | 27                             | 39                              | 65                              | 47                             | 39                              | 217   |

| Cochran-Mantel-Haenszel Statistics (Based on Table Scores) |                        |    |         |        |
|------------------------------------------------------------|------------------------|----|---------|--------|
| Statistic                                                  | Alternative Hypothesis | DF | Value   | Prob   |
| 1                                                          | Nonzero Correlation    | 1  | 30.6748 | <.0001 |

**Supplementary Table S17. Distribution of APC/TP53/KRAS/NRAS/BRAF subgroups by CTX-S Quartiles (left vs. right) in Moffitt CRCs (n=464)**

**Note:** The quartiles with higher scores (Q3 and Q4) are predicted to be more responsive to CTX. A — APC truncating mutation; P — TP53 mutation; K — KRAS mutation; N — NRAS mutation; MUT BRAF — all BRAF-mutated tumors. K\* — K or N. WT — wild type for all A/P/K\*/B

Note: **A-C.** 2-sided p-values for the chi-square goodness-of-fit tests; R denotes that the Q2 or Q1 probability is more than expected, rather than Q4 or Q3. **D, E.** Cochran-Mantel-Haenszel test.

**A. Left vs. Right**

| Subgroups | N   | Left |     | Right |     | p_2-SIDED | Reverse Direction |
|-----------|-----|------|-----|-------|-----|-----------|-------------------|
|           |     | n    | %   | n     | %   |           |                   |
| AP        | 101 | 84   | 83% | 17    | 17% | 0.000002  |                   |
| APK*      | 90  | 49   | 54% | 41    | 46% | 0.578     | R                 |
| A         | 37  | 26   | 70% | 11    | 30% | 0.21      |                   |
| P         | 37  | 22   | 59% | 15    | 41% | 1         |                   |
| AK*       | 73  | 40   | 55% | 33    | 45% | 0.5572    | R                 |
| PK*       | 20  | 10   | 50% | 10    | 50% | 0.5598    | R                 |
| WT        | 34  | 19   | 56% | 15    | 44% | 0.853     | R                 |
| K*        | 19  | 10   | 53% | 9     | 47% | 0.743     | R                 |
| MUT BRAF  | 53  | 13   | 25% | 40    | 75% | 0.000002  | R                 |
| Total     | 464 | 273  | 59% | 191   | 41% |           |                   |

**B. Left-sided tumors (n=273) Q4 or Q3 vs. Q2 or Q1**

| Subgroups | N   | Q4 (highest) |     | Q3 |     | Q2 |     | Q1 (lowest) |     | Q4 or Q3 |     | Q2 or Q1 |      | p_2-SIDED | Reverse Direction |
|-----------|-----|--------------|-----|----|-----|----|-----|-------------|-----|----------|-----|----------|------|-----------|-------------------|
|           |     | n            | %   | n  | %   | n  | %   | n           | %   | n        | %   | n        | %    |           |                   |
| AP        | 84  | 52           | 62% | 25 | 30% | 5  | 6%  | 2           | 2%  | 77       | 92% | 7        | 8%   | 0.000002  |                   |
| APK*      | 49  | 18           | 37% | 19 | 39% | 10 | 20% | 2           | 4%  | 37       | 76% | 12       | 24%  | 0.0004    |                   |
| A         | 26  | 8            | 31% | 9  | 35% | 2  | 8%  | 6           | 23% | 17       | 65% | 8        | 31%  | 0.0756    |                   |
| P         | 22  | 9            | 41% | 6  | 27% | 5  | 23% | 2           | 9%  | 15       | 68% | 7        | 32%  | 0.1338    |                   |
| AK*       | 40  | 0            | 0%  | 11 | 28% | 17 | 43% | 12          | 30% | 11       | 28% | 29       | 73%  | 0.0064    | R                 |
| PK*       | 10  | 1            | 10% | 0  | 0%  | 8  | 80% | 1           | 10% | 1        | 10% | 9        | 90%  | 0.0214    | R                 |
| WT        | 19  | 1            | 5%  | 1  | 5%  | 3  | 16% | 15          | 79% | 2        | 11% | 18       | 95%  | 0.0008    | R                 |
| K*        | 10  | 0            | 0%  | 1  | 10% | 3  | 30% | 6           | 60% | 1        | 10% | 9        | 90%  | 0.0214    | R                 |
| MUT BRAF  | 13  | 0            | 0%  | 0  | 0%  | 6  | 46% | 7           | 54% | 0        | 0%  | 13       | 100% | 0.0002    | R                 |
| Total     | 273 | 89           | 47% | 72 | 38% | 59 | 31% | 53          | 28% | 161      | 59% | 112      | 41%  | 0.0036    |                   |

**C. Right-sided tumors (n=191) Q4 or Q3 vs. Q2 or Q1**

| Subgroups | N   | Q4 (highest) |     | Q3 |     | Q2 |     | Q1 (lowest) |     | Q4 or Q3 |     | Q2 or Q1 |      | p_2-SIDED | Reverse Direction |
|-----------|-----|--------------|-----|----|-----|----|-----|-------------|-----|----------|-----|----------|------|-----------|-------------------|
|           |     | n            | %   | n  | %   | n  | %   | n           | %   | n        | %   | n        | %    |           |                   |
| AP        | 17  | 8            | 47% | 6  | 35% | 1  | 6%  | 2           | 0   | 14       | 82% | 3        | 18%  | 0.0126    |                   |
| APK*      | 41  | 11           | 27% | 19 | 46% | 10 | 24% | 1           | 0   | 30       | 73% | 11       | 27%  | 0.0044    |                   |
| A         | 11  | 1            | 9%  | 3  | 27% | 5  | 45% | 2           | 0   | 4        | 36% | 7        | 64%  | 0.5488    | R                 |
| P         | 15  | 1            | 7%  | 4  | 27% | 8  | 53% | 2           | 0   | 5        | 33% | 10       | 67%  | 0.3018    | R                 |
| AK*       | 33  | 4            | 12% | 4  | 12% | 14 | 42% | 11          | 0   | 8        | 24% | 25       | 76%  | 0.0046    | R                 |
| PK*       | 10  | 1            | 10% | 5  | 50% | 2  | 20% | 2           | 0   | 6        | 60% | 4        | 40%  | 0.754     |                   |
| WT        | 15  | 0            | 0%  | 1  | 7%  | 1  | 7%  | 13          | 1   | 1        | 7%  | 14       | 93%  | 0.001     | R                 |
| K*        | 9   | 0            | 0%  | 0  | 0%  | 7  | 78% | 2           | 0   | 0        | 0%  | 9        | 100% | 0.0038    | R                 |
| MUT BRAF  | 40  | 0            | 0%  | 1  | 3%  | 10 | 25% | 29          | 1   | 1        | 3%  | 39       | 98%  | 0.000002  | R                 |
| Total     | 191 | 26           | 14% | 43 | 23% | 58 | 30% | 64          | 34% | 69       | 36% | 122      | 64%  | 0.0002    | R                 |

**D. Left-sided tumors (n=273) CMH test**

| WT RAS_RAF | N   | Q4 (highest) |     | Q3 |     | Q2 |     | Q1 (lowest) |     | CMH chi-square for trend | p-value |
|------------|-----|--------------|-----|----|-----|----|-----|-------------|-----|--------------------------|---------|
| Subgroups  | N   | n            | %   | n  | %   | n  | %   | n           | %   |                          |         |
| AP         | 84  | 52           | 62% | 25 | 30% | 5  | 6%  | 2           | 2%  |                          |         |
| A_P_WT     | 67  | 18           | 27% | 16 | 24% | 10 | 15% | 23          | 34% | 35.22                    | <.0001  |
| Total      | 151 | 70           | 46% | 41 | 27% | 15 | 10% | 25          | 17% |                          |         |

  

| MUT RAS_RAF     | N   | Q4 (highest) |     | Q3 |     | Q2 |     | Q1 (lowest) |     | CMH chi-square for trend | p-value |
|-----------------|-----|--------------|-----|----|-----|----|-----|-------------|-----|--------------------------|---------|
| Subgroups       | N   | n            | %   | n  | %   | n  | %   | n           | %   |                          |         |
| APK*            | 49  | 18           | 37% | 19 | 39% | 10 | 20% | 2           | 4%  | 45.44                    | <.0001  |
| AK*_PK*_K*_BRAF | 73  | 1            | 1%  | 12 | 16% | 34 | 47% | 26          | 36% |                          |         |
| Total           | 113 | 1            | 1%  | 23 | 20% | 51 | 45% | 38          | 34% |                          |         |

  

| AP vs APK* | N   | Q4 (highest) |     | Q3 |     | Q2 |     | Q1 (lowest) |    | CMH chi-square for trend | p-value |
|------------|-----|--------------|-----|----|-----|----|-----|-------------|----|--------------------------|---------|
| Subgroups  | N   | n            | %   | n  | %   | n  | %   | n           | %  |                          |         |
| AP         | 84  | 52           | 62% | 25 | 30% | 5  | 6%  | 2           | 2% | 8.96                     | 0.0028  |
| APK*       | 49  | 18           | 37% | 19 | 39% | 10 | 20% | 2           | 4% |                          |         |
| Total      | 133 | 70           | 53% | 44 | 33% | 15 | 11% | 4           | 3% |                          |         |

**E. Right-sided tumors (n=191) CMH test**

| WT RAS_RAF      |     | Q4 (highest) |     | Q3 |     | Q2 |     | Q1 (lowest) |     | CMH<br>chi-<br>square<br>for trend | p-value |
|-----------------|-----|--------------|-----|----|-----|----|-----|-------------|-----|------------------------------------|---------|
| Subgroups       | N   | n            | %   | n  | %   | n  | %   | n           | %   |                                    |         |
| AP              | 17  | 8            | 47% | 6  | 35% | 1  | 6%  | 2           | 12% | 16.71                              | <.0001  |
| A_P_WT          | 41  | 2            | 5%  | 8  | 20% | 14 | 34% | 17          | 41% |                                    |         |
| Total           | 58  | 10           | 17% | 14 | 24% | 15 | 26% | 19          | 33% |                                    |         |
|                 |     |              |     |    |     |    |     |             |     |                                    |         |
| MUT RAS_RAF     |     | Q4 (highest) |     | Q3 |     | Q2 |     | Q1 (lowest) |     |                                    |         |
| Subgroups       | N   | n            | %   | n  | %   | n  | %   | n           | %   |                                    |         |
| APK*            | 41  | 11           | 27% | 19 | 46% | 10 | 24% | 1           | 2%  | 42.06                              | <.0001  |
| AK*_PK*_K*_BRAF | 92  | 5            | 5%  | 10 | 11% | 33 | 36% | 44          | 48% |                                    |         |
| Total           | 125 | 9            | 7%  | 14 | 11% | 47 | 38% | 55          | 44% |                                    |         |
|                 |     |              |     |    |     |    |     |             |     |                                    |         |
| AP vs APK*      |     | Q4 (highest) |     | Q3 |     | Q2 |     | Q1 (lowest) |     |                                    |         |
| Subgroups       | N   | n            | %   | n  | %   | n  | %   | n           | %   |                                    |         |
| AP              | 17  | 8            | 47% | 6  | 35% | 1  | 6%  | 2           | 12% |                                    |         |
| APK*            | 41  | 11           | 27% | 19 | 46% | 10 | 24% | 1           | 2%  | 0.66                               | 0.4169  |
| Total           | 58  | 19           | 33% | 25 | 43% | 11 | 19% | 3           | 5%  |                                    |         |

**Supplementary Table S18. Barnard's Exact Test on the frequencies of single driver genes (*APC*, *TP53*, *KRAS/NRAS*, or *BRAF*) by the sidedness (Left vs Right) in Moffitt CRCs (n=464).**

**Note:** Of 468 CRCs, 4 samples without tumor location information were excluded. mAPC — *APC* truncating mutation; TP53 — *TP53* mutation; mRAS — *KRAS/NRAS* mutation; m*BRAF* — *BRAF*(V600E). The significant *P* values are highlighted by yellow color.

**A. mutAPC**

**A-1. All patients (Left vs. Right n=464)**

| Table of position by Status                         |                                 |                                 |       |
|-----------------------------------------------------|---------------------------------|---------------------------------|-------|
| position                                            | Status                          |                                 |       |
| Frequency<br>Expected<br>Cell Chi-Square<br>Col Pct | mAPC                            | others                          | Total |
| <b>Left</b>                                         | 200<br>181.8<br>1.8212<br>64.72 | 73<br>91.196<br>3.6306<br>47.10 | 273   |
| <b>Right</b>                                        | 109<br>127.2<br>2.6031<br>35.28 | 82<br>63.804<br>5.1893<br>52.90 | 191   |
| <b>Total</b>                                        | 309                             | 155                             | 464   |

| Barnard's Exact Test<br>Proportion (Risk) Difference |        |
|------------------------------------------------------|--------|
| H0: P1 - P2 = 0                                      |        |
| Proportion Difference                                | 0.1619 |
| ASE (H0)                                             | 0.0445 |
| Z                                                    | 3.6393 |
| One-sided Pr >= Z                                    | 0.0002 |
| Two-sided Pr >=  Z                                   | 0.0003 |

**A-2. MSS patients (Left vs. Right n=403)**

| Table of position by Status                         |                                  |                                 |       |
|-----------------------------------------------------|----------------------------------|---------------------------------|-------|
| position                                            | Status                           |                                 |       |
| Frequency<br>Expected<br>Cell Chi-Square<br>Col Pct | mAPC                             | others                          | Total |
| <b>Left</b>                                         | 193<br>189.76<br>0.0553<br>65.87 | 68<br>71.241<br>0.1474<br>61.82 | 261   |
| <b>Right</b>                                        | 100<br>103.24<br>0.1017<br>34.13 | 42<br>38.759<br>0.271<br>38.18  | 142   |
| <b>Total</b>                                        | 293                              | 110                             | 403   |

| Barnard's Exact Test<br>Proportion (Risk) Difference |        |
|------------------------------------------------------|--------|
| H0: P1 - P2 = 0                                      |        |
| Proportion Difference                                | 0.0352 |
| ASE (H0)                                             | 0.0465 |
| Z                                                    | 0.7586 |
| One-sided Pr >= Z                                    | 0.2388 |
| Two-sided Pr >=  Z                                   | 0.4645 |

### A-3. Stage IV patients (107)

| Table of position by Status                         |                                |                                |       |
|-----------------------------------------------------|--------------------------------|--------------------------------|-------|
| position                                            | Status                         |                                |       |
| Frequency<br>Expected<br>Cell Chi-Square<br>Col Pct | mAPC                           | others                         | Total |
| <b>Left</b>                                         | 43<br>43.57<br>0.0075<br>58.11 | 20<br>19.43<br>0.0167<br>60.61 | 63    |
| <b>Right</b>                                        | 31<br>30.43<br>0.0107<br>41.89 | 13<br>13.57<br>0.024<br>39.39  | 44    |
| <b>Total</b>                                        | 74                             | 33                             | 107   |



| <b>Barnard's Exact Test<br/>Proportion (Risk) Difference</b> |         |
|--------------------------------------------------------------|---------|
| <b>H0: P1 - P2 = 0</b>                                       |         |
| <b>Proportion Difference</b>                                 | -0.0220 |
| <b>ASE (H0)</b>                                              | 0.0907  |
| <b>Z</b>                                                     | -0.2425 |
| <b>One-sided Pr &lt;= Z</b>                                  | 0.4554  |
| <b>Two-sided Pr &gt;=  Z </b>                                | 0.9083  |

**B. mutTP53**

**B-1. All patients (Left vs. Right n=464)**

| <b>Table of position by Status</b>                            |                                  |                                 |              |
|---------------------------------------------------------------|----------------------------------|---------------------------------|--------------|
| <b>position</b>                                               | <b>Status</b>                    |                                 |              |
| <b>Frequency<br/>Expected<br/>Cell Chi-Square<br/>Col Pct</b> | <b>mTP53</b>                     | <b>others</b>                   | <b>Total</b> |
| <b>Left</b>                                                   | 174<br>160.62<br>1.1141<br>63.74 | 99<br>112.38<br>1.5924<br>51.83 | 273          |
| <b>Right</b>                                                  | 99<br>112.38<br>1.5924<br>36.26  | 92<br>78.623<br>2.276<br>48.17  | 191          |
| <b>Total</b>                                                  | 273                              | 191                             | 464          |

| <b>Barnard's Exact Test<br/>Proportion (Risk) Difference</b> |               |
|--------------------------------------------------------------|---------------|
| <b>H0: P1 - P2 = 0</b>                                       |               |
| <b>Proportion Difference</b>                                 | 0.1190        |
| <b>ASE (H0)</b>                                              | 0.0464        |
| <b>Z</b>                                                     | 2.5642        |
| <b>One-sided Pr &gt;= Z</b>                                  | 0.0062        |
| <b>Two-sided Pr &gt;=  Z </b>                                | <b>0.0105</b> |

**B-2. MSS patients (Left vs. Right n=403)**

| <b>Table of position by Status</b>                            |                                 |                                 |              |
|---------------------------------------------------------------|---------------------------------|---------------------------------|--------------|
| <b>position</b>                                               | <b>Status</b>                   |                                 |              |
| <b>Frequency<br/>Expected<br/>Cell Chi-Square<br/>Col Pct</b> | <b>mTP53</b>                    | <b>others</b>                   | <b>Total</b> |
| <b>Left</b>                                                   | 170<br>166.44<br>0.076<br>66.15 | 91<br>94.556<br>0.1337<br>62.33 | 261          |
| <b>Right</b>                                                  | 87<br>90.556<br>0.1396<br>33.85 | 55<br>51.444<br>0.2458<br>37.67 | 142          |
| <b>Total</b>                                                  | 257                             | 146                             | 403          |

| <b>Barnard's Exact Test<br/>Proportion (Risk) Difference</b> |        |
|--------------------------------------------------------------|--------|
| <b>H0: P1 - P2 = 0</b>                                       |        |
| <b>Proportion Difference</b>                                 | 0.0387 |
| <b>ASE (H0)</b>                                              | 0.0501 |
| <b>Z</b>                                                     | 0.7714 |
| <b>One-sided Pr &gt;= Z</b>                                  | 0.2300 |
| <b>Two-sided Pr &gt;=  Z </b>                                | 0.4490 |

**B-3. Stage IV patients (107)**

| <b>Table of position by Status</b>                            |                                 |                                 |              |
|---------------------------------------------------------------|---------------------------------|---------------------------------|--------------|
| <b>position</b>                                               | <b>Status</b>                   |                                 |              |
| <b>Frequency<br/>Expected<br/>Cell Chi-Square<br/>Col Pct</b> | <b>mTP53</b>                    | <b>others</b>                   | <b>Total</b> |
| <b>Left</b>                                                   | 42<br>38.271<br>0.3633<br>64.62 | 21<br>24.729<br>0.5623<br>50.00 | 63           |
| <b>Right</b>                                                  | 23<br>26.729<br>0.5202<br>35.38 | 21<br>17.271<br>0.8051<br>50.00 | 44           |
| <b>Total</b>                                                  | 65                              | 42                              | 107          |

| <b>Barnard's Exact Test<br/>Proportion (Risk) Difference</b> |        |
|--------------------------------------------------------------|--------|
| <b>H0: P1 - P2 = 0</b>                                       |        |
| <b>Proportion Difference</b>                                 | 0.1439 |
| <b>ASE (H0)</b>                                              | 0.0959 |
| <b>Z</b>                                                     | 1.5003 |
| <b>One-sided Pr &gt;= Z</b>                                  | 0.0759 |
| <b>Two-sided Pr &gt;=  Z </b>                                | 0.1381 |

### C. mutKRAS/NRAS

#### C-1. All patients (Left vs. Right n=464)

| <b>Table of position by Status</b>                            |                                  |                                  |              |
|---------------------------------------------------------------|----------------------------------|----------------------------------|--------------|
| <b>position</b>                                               | <b>Status</b>                    |                                  |              |
| <b>Frequency<br/>Expected<br/>Cell Chi-Square<br/>Col Pct</b> | <b>mRAS</b>                      | <b>others</b>                    | <b>Total</b> |
| <b>Left</b>                                                   | 109<br>118.85<br>0.8162<br>53.96 | 164<br>154.15<br>0.6293<br>62.60 | 273          |
| <b>Right</b>                                                  | 93<br>83.151<br>1.1666<br>46.04  | 98<br>107.85<br>0.8995<br>37.40  | 191          |
| <b>Total</b>                                                  | 202                              | 262                              | 464          |

| <b>Barnard's Exact Test<br/>Proportion (Risk) Difference</b> |         |
|--------------------------------------------------------------|---------|
| <b>H0: P1 - P2 = 0</b>                                       |         |
| <b>Proportion Difference</b>                                 | -0.0876 |
| <b>ASE (H0)</b>                                              | 0.0468  |
| <b>Z</b>                                                     | -1.8739 |
| <b>One-sided Pr &lt;= Z</b>                                  | 0.0324  |
| <b>Two-sided Pr &gt;=  Z </b>                                | 0.0623  |

**C-2. MSS patients (Left vs. Right n=403)**

| Table of position by Status                         |                                 |                                 |       |
|-----------------------------------------------------|---------------------------------|---------------------------------|-------|
| position                                            | Status                          |                                 |       |
| Frequency<br>Expected<br>Cell Chi-Square<br>Col Pct | mRAS                            | others                          | Total |
| <b>Left</b>                                         | 104<br>123.7<br>3.1373<br>54.45 | 157<br>137.3<br>2.8265<br>74.06 | 261   |
| <b>Right</b>                                        | 87<br>67.3<br>5.7664<br>45.55   | 55<br>74.7<br>5.1952<br>25.94   | 142   |
| <b>Total</b>                                        | 191                             | 212                             | 403   |

| Barnard's Exact Test<br>Proportion (Risk) Difference |         |
|------------------------------------------------------|---------|
| H0: P1 - P2 = 0                                      |         |
| Proportion Difference                                | -0.2142 |
| ASE (H0)                                             | 0.0521  |
| Z                                                    | -4.1140 |
| One-sided Pr <= Z                                    | <.0001  |
| Two-sided Pr >=  Z                                   | <.0001  |

**C-3. Stage IV patients (107)**

| Table of position by Status                         |                                 |                                 |       |
|-----------------------------------------------------|---------------------------------|---------------------------------|-------|
| position                                            | Status                          |                                 |       |
| Frequency<br>Expected<br>Cell Chi-Square<br>Col Pct | mRAS                            | others                          | Total |
| <b>Left</b>                                         | 27<br>31.794<br>0.723<br>50.00  | 36<br>31.206<br>0.7366<br>67.92 | 63    |
| <b>Right</b>                                        | 27<br>22.206<br>1.0352<br>50.00 | 17<br>21.794<br>1.0547<br>32.08 | 44    |
| <b>Total</b>                                        | 54                              | 53                              | 107   |

| Barnard's Exact Test<br>Proportion (Risk) Difference |         |
|------------------------------------------------------|---------|
| H0: P1 - P2 = 0                                      |         |
| Proportion Difference                                | -0.1851 |
| ASE (H0)                                             | 0.0982  |
| Z                                                    | -1.8840 |
| One-sided Pr <= Z                                    | 0.0415  |
| Two-sided Pr >=  Z                                   | 0.0689  |

#### D. mutBRAF

##### D-1. All patients (Left vs. Right n=464)

| Table of position by Status                         |                                 |                                  |       |
|-----------------------------------------------------|---------------------------------|----------------------------------|-------|
| position                                            | Status                          |                                  |       |
| Frequency<br>Expected<br>Cell Chi-Square<br>Col Pct | mBRAF                           | others                           | Total |
| <b>Left</b>                                         | 13<br>31.183<br>10.603<br>24.53 | 260<br>241.82<br>1.3673<br>63.26 | 273   |
| <b>Right</b>                                        | 40<br>21.817<br>15.155<br>75.47 | 151<br>169.18<br>1.9543<br>36.74 | 191   |
| <b>Total</b>                                        | 53                              | 411                              | 464   |

| Barnard's Exact Test<br>Proportion (Risk) Difference |         |
|------------------------------------------------------|---------|
| H0: P1 - P2 = 0                                      |         |
| Proportion Difference                                | -0.1618 |
| ASE (H0)                                             | 0.0300  |
| Z                                                    | -5.3925 |
| One-sided Pr <= Z                                    | <.0001  |
| Two-sided Pr >=  Z                                   | <.0001  |

**D-2. MSS patients (Left vs. Right n=403)**

| <b>Table of position by Status</b>                            |                                |                                  |              |
|---------------------------------------------------------------|--------------------------------|----------------------------------|--------------|
| <b>position</b>                                               | <b>Status</b>                  |                                  |              |
| <b>Frequency<br/>Expected<br/>Cell Chi-Square<br/>Col Pct</b> | <b>mBRAF</b>                   | <b>others</b>                    | <b>Total</b> |
| <b>Left</b>                                                   | 9<br>11.658<br>0.6058<br>50.00 | 252<br>249.34<br>0.0283<br>65.45 | 261          |
| <b>Right</b>                                                  | 9<br>6.3424<br>1.1136<br>50.00 | 133<br>135.66<br>0.0521<br>34.55 | 142          |
| <b>Total</b>                                                  | 18                             | 385                              | 403          |

| <b>Barnard's Exact Test<br/>Proportion (Risk) Difference</b> |         |
|--------------------------------------------------------------|---------|
| <b>H0: P1 - P2 = 0</b>                                       |         |
| <b>Proportion Difference</b>                                 | -0.0289 |
| <b>ASE (H0)</b>                                              | 0.0215  |
| <b>Z</b>                                                     | -1.3416 |
| <b>One-sided Pr &lt;= Z</b>                                  | 0.1627  |
| <b>Two-sided Pr &gt;=  Z </b>                                | 0.1942  |

**D-3. Stage IV patients (107)**

| <b>Table of position by Status</b>                            |                                |                                 |              |
|---------------------------------------------------------------|--------------------------------|---------------------------------|--------------|
| <b>position</b>                                               | <b>Status</b>                  |                                 |              |
| <b>Frequency<br/>Expected<br/>Cell Chi-Square<br/>Col Pct</b> | <b>mBRAF</b>                   | <b>others</b>                   | <b>Total</b> |
| <b>Left</b>                                                   | 3<br>5.8879<br>1.4164<br>30.00 | 60<br>57.112<br>0.146<br>61.86  | 63           |
| <b>Right</b>                                                  | 7<br>4.1121<br>2.0281<br>70.00 | 37<br>39.888<br>0.2091<br>38.14 | 44           |
| <b>Total</b>                                                  | 10                             | 97                              | 107          |

| <b>Barnard's Exact Test<br/>Proportion (Risk) Difference</b> |         |
|--------------------------------------------------------------|---------|
| <b>H0: P1 - P2 = 0</b>                                       |         |
| <b>Proportion Difference</b>                                 | -0.1115 |
| <b>ASE (H0)</b>                                              | 0.0572  |
| <b>Z</b>                                                     | -1.9493 |
| <b>One-sided Pr &lt;= Z</b>                                  | 0.0319  |
| <b>Two-sided Pr &gt;=  Z </b>                                | 0.0548  |

**Supplementary Table S19. Cochran-Mantel-Haenszel test or Barnard test on the frequencies of single driver genes (*APC*, *TP53*, *KRAS/NRAS*, or *BRAF*) by the sidedness (Left vs Right) in TCGA CRCs (n=217).**

**Note:** Of 221 CRCs, 3 samples without tumor location information and 1 sample without MSI status information were excluded. mAPC — APC truncating mutation; TP53 — TP53 mutation; mRAS — KRAS/NRAS mutation; mBRAF — BRAF(V600E). The significant *P* values are highlighted by yellow color.

**A. mutAPC**

**A-1. All patients (Left vs. Right n=217)**

| Table of position by Status                         |                                  |                                |       |
|-----------------------------------------------------|----------------------------------|--------------------------------|-------|
| position                                            | Status                           |                                |       |
| Frequency<br>Expected<br>Cell Chi-Square<br>Col Pct | mAPC                             | others                         | Total |
| <b>Left</b>                                         | 113<br>101.29<br>1.3537<br>71.97 | 27<br>38.71<br>3.5422<br>45.00 | 140   |
| <b>Right</b>                                        | 44<br>55.71<br>2.4613<br>28.03   | 33<br>21.29<br>6.4403<br>55.00 | 77    |
| <b>Total</b>                                        | 157                              | 60                             | 217   |

| Barnard's Exact Test<br>Proportion (Risk) Difference |        |
|------------------------------------------------------|--------|
| H0: P1 - P2 = 0                                      |        |
| Proportion Difference                                | 0.2357 |
| ASE (H0)                                             | 0.0635 |
| Z                                                    | 3.7145 |
| One-sided Pr >= Z                                    | 0.0001 |
| Two-sided Pr >=  Z                                   | 0.0002 |



**A-2. MSS patients (Left vs. Right n=190)**

| <b>Table of position by Status</b>                            |                                  |                                 |              |
|---------------------------------------------------------------|----------------------------------|---------------------------------|--------------|
| <b>position</b>                                               | <b>Status</b>                    |                                 |              |
| <b>Frequency<br/>Expected<br/>Cell Chi-Square<br/>Col Pct</b> | <b>mAPC</b>                      | <b>others</b>                   | <b>Total</b> |
| <b>Left</b>                                                   | 112<br>109.01<br>0.0823<br>75.17 | 27<br>29.995<br>0.299<br>65.85  | 139          |
| <b>Right</b>                                                  | 37<br>39.995<br>0.2242<br>24.83  | 14<br>11.005<br>0.8149<br>34.15 | 51           |
| <b>Total</b>                                                  | 149                              | 41                              | 190          |

| <b>Barnard's Exact Test<br/>Proportion (Risk) Difference</b> |        |
|--------------------------------------------------------------|--------|
| <b>H0: P1 - P2 = 0</b>                                       |        |
| <b>Proportion Difference</b>                                 | 0.0803 |
| <b>ASE (H0)</b>                                              | 0.0673 |
| <b>Z</b>                                                     | 1.1918 |
| <b>One-sided Pr &gt;= Z</b>                                  | 0.1409 |
| <b>Two-sided Pr &gt;=  Z </b>                                | 0.2679 |

**B. mutTP53**

**B-1. All patients (Left vs. Right n=217)**

| <b>Table of position by Status</b>                            |                                 |                                 |              |
|---------------------------------------------------------------|---------------------------------|---------------------------------|--------------|
| <b>position</b>                                               | <b>Status</b>                   |                                 |              |
| <b>Frequency<br/>Expected<br/>Cell Chi-Square<br/>Col Pct</b> | <b>mTP53</b>                    | <b>others</b>                   | <b>Total</b> |
| <b>Left</b>                                                   | 90<br>75.484<br>2.7916<br>76.92 | 50<br>64.516<br>3.2661<br>50.00 | 140          |
| <b>Right</b>                                                  | 27<br>41.516<br>5.0756<br>23.08 | 50<br>35.484<br>5.9384<br>50.00 | 77           |
| <b>Total</b>                                                  | 117                             | 100                             | 217          |

| <b>Barnard's Exact Test<br/>Proportion (Risk) Difference</b> |                  |
|--------------------------------------------------------------|------------------|
| <b>H0: P1 - P2 = 0</b>                                       |                  |
| <b>Proportion Difference</b>                                 | 0.2922           |
| <b>ASE (H0)</b>                                              | 0.0707           |
| <b>Z</b>                                                     | 4.1318           |
| <b>One-sided Pr &gt;= Z</b>                                  | <.0001           |
| <b>Two-sided Pr &gt;=  Z </b>                                | <b>&lt;.0001</b> |

**B-2. MSS patients (Left vs. Right n=190)**

| <b>Table of position by Status</b>                            |                                 |                                 |              |
|---------------------------------------------------------------|---------------------------------|---------------------------------|--------------|
| <b>position</b>                                               | <b>Status</b>                   |                                 |              |
| <b>Frequency<br/>Expected<br/>Cell Chi-Square<br/>Col Pct</b> | <b>mTP53</b>                    | <b>others</b>                   | <b>Total</b> |
| <b>Left</b>                                                   | 89<br>81.937<br>0.6089<br>79.46 | 50<br>57.063<br>0.8743<br>64.10 | 139          |
| <b>Right</b>                                                  | 23<br>30.063<br>1.6594<br>20.54 | 28<br>20.937<br>2.3828<br>35.90 | 51           |
| <b>Total</b>                                                  | 112                             | 78                              | 190          |

| <b>Barnard's Exact Test<br/>Proportion (Risk) Difference</b> |               |
|--------------------------------------------------------------|---------------|
| <b>H0: P1 - P2 = 0</b>                                       |               |
| <b>Proportion Difference</b>                                 | 0.1893        |
| <b>ASE (H0)</b>                                              | 0.0805        |
| <b>Z</b>                                                     | 2.3506        |
| <b>One-sided Pr &gt;= Z</b>                                  | 0.0134        |
| <b>Two-sided Pr &gt;=  Z </b>                                | <b>0.0201</b> |

C. mutKRAS/NRAS

C-1. All patients (Left vs. Right n=217)

| Table of position by Status                         |                                 |                                 |       |
|-----------------------------------------------------|---------------------------------|---------------------------------|-------|
| position                                            | Status                          |                                 |       |
| Frequency<br>Expected<br>Cell Chi-Square<br>Col Pct | mRAS                            | others                          | Total |
| <b>Left</b>                                         | 68<br>69.032<br>0.0154<br>63.55 | 72<br>70.968<br>0.015<br>65.45  | 140   |
| <b>Right</b>                                        | 39<br>37.968<br>0.0281<br>36.45 | 38<br>39.032<br>0.0273<br>34.55 | 77    |
| <b>Total</b>                                        | 107                             | 110                             | 217   |

| Barnard's Exact Test<br>Proportion (Risk) Difference |         |
|------------------------------------------------------|---------|
| H0: P1 - P2 = 0                                      |         |
| Proportion Difference                                | -0.0208 |
| ASE (H0)                                             | 0.0709  |
| Z                                                    | -0.2929 |
| One-sided Pr <= Z                                    | 0.4170  |
| Two-sided Pr >=  Z                                   | 0.7996  |

C-2. MSS patients (Left vs. Right n=190)

| Table of position by Status                         |                                 |                                 |       |
|-----------------------------------------------------|---------------------------------|---------------------------------|-------|
| position                                            | Status                          |                                 |       |
| Frequency<br>Expected<br>Cell Chi-Square<br>Col Pct | mRAS                            | others                          | Total |
| <b>Left</b>                                         | 65<br>72.426<br>0.7615<br>65.66 | 74<br>66.574<br>0.8284<br>81.32 | 139   |
| <b>Right</b>                                        | 34<br>26.574<br>2.0754<br>34.34 | 17<br>24.426<br>2.2578<br>18.68 | 51    |
| <b>Total</b>                                        | 99                              | 91                              | 190   |

| Barnard's Exact Test<br>Proportion (Risk) Difference |         |
|------------------------------------------------------|---------|
| H0: P1 - P2 = 0                                      |         |
| Proportion Difference                                | -0.1990 |
| ASE (H0)                                             | 0.0818  |
| Z                                                    | -2.4337 |
| One-sided Pr <= Z                                    | 0.0105  |
| Two-sided Pr >=  Z                                   | 0.0152  |

#### D. mutBRAF

##### D-1. All patients (Left vs. Right n=217)

| Table of position by Status                         |                                 |                                  |       |
|-----------------------------------------------------|---------------------------------|----------------------------------|-------|
| position                                            | Status                          |                                  |       |
| Frequency<br>Expected<br>Cell Chi-Square<br>Col Pct | mBRAF                           | others                           | Total |
| <b>Left</b>                                         | 2<br>12.258<br>8.5844<br>10.53  | 138<br>127.74<br>0.8238<br>69.70 | 140   |
| <b>Right</b>                                        | 17<br>6.7419<br>15.608<br>89.47 | 60<br>70.258<br>1.4977<br>30.30  | 77    |
| <b>Total</b>                                        | 19                              | 198                              | 217   |

| Barnard's Exact Test<br>Proportion (Risk) Difference |         |
|------------------------------------------------------|---------|
| H0: P1 - P2 = 0                                      |         |
| Proportion Difference                                | -0.2065 |
| ASE (H0)                                             | 0.0401  |
| Z                                                    | -5.1492 |
| One-sided Pr <= Z                                    | <.0001  |
| Two-sided Pr >=  Z                                   | <.0001  |

**D-2. MSS patients (Left vs. Right n=190)**

| <b>Table of position by Status</b>                            |                                |                                  |              |
|---------------------------------------------------------------|--------------------------------|----------------------------------|--------------|
| <b>position</b>                                               | <b>Status</b>                  |                                  |              |
| <b>Frequency<br/>Expected<br/>Cell Chi-Square<br/>Col Pct</b> | <b>mBRAF</b>                   | <b>others</b>                    | <b>Total</b> |
| <b>Left</b>                                                   | 2<br>3.6579<br>0.7514<br>40.00 | 137<br>135.34<br>0.0203<br>74.05 | 139          |
| <b>Right</b>                                                  | 3<br>1.3421<br>2.048<br>60.00  | 48<br>49.658<br>0.0554<br>25.95  | 51           |
| <b>Total</b>                                                  | 5                              | 185                              | 190          |

| <b>Barnard's Exact Test<br/>Proportion (Risk) Difference</b> |         |
|--------------------------------------------------------------|---------|
| <b>H0: P1 - P2 = 0</b>                                       |         |
| <b>Proportion Difference</b>                                 | -0.0444 |
| <b>ASE (H0)</b>                                              | 0.0262  |
| <b>Z</b>                                                     | -1.6956 |
| <b>One-sided Pr &lt;= Z</b>                                  | 0.0653  |
| <b>Two-sided Pr &gt;=  Z </b>                                | 0.0949  |

**Supplementary Table S20. Frequencies (and percentages) of right-sided tumors, stages, distant metastasis, and histotypes**

| Group          | N   | Age***<br>Median | Right* |    | d_Mets |    | Stages** |    |     |    |     |    | Histotypes |    |        |    |
|----------------|-----|------------------|--------|----|--------|----|----------|----|-----|----|-----|----|------------|----|--------|----|
|                |     |                  | No.    | %  | No.    | %  | I-II     |    | III |    | IV  |    | AD_muc     |    | AD_NOS |    |
|                |     |                  | No.    | %  | No.    | %  | No.      | %  | No. | %  | No. | %  | No.        | %  | No.    | %  |
| MSI            | 61  | 76               | 49↑↑↑  | 80 | 7↓↓    | 11 | 40↑↑     | 65 | 15  | 25 | 6↓  | 10 | 9          | 15 | 52     | 85 |
| APK*           | 91  | 65↓↓↓            | 41     | 46 | 45↑    | 49 | 24↓      | 27 | 41↑ | 45 | 25  | 28 | 4          | 4  | 87     | 96 |
| AK* or PK*     | 85  | 67↓↓             | 39     | 46 | 33     | 39 | 38       | 44 | 23  | 27 | 24  | 29 | 10         | 11 | 75     | 89 |
| K* or MUT BRAF | 33  | 66               | 15     | 45 | 16     | 48 | 11       | 33 | 10  | 30 | 12  | 36 | 6          | 18 | 27     | 82 |
| AP             | 102 | 60↓↓↓            | 17↓↓↓  | 17 | 38     | 37 | 40       | 38 | 35  | 35 | 27  | 27 | 3↓         | 3  | 99     | 97 |
| A or P         | 68  | 68↓              | 21     | 31 | 18     | 26 | 36       | 52 | 23  | 35 | 9   | 14 | 4          | 6  | 64     | 94 |
| WT AP          | 28  | 65↓↓             | 9      | 32 | 8      | 29 | 14       | 50 | 7   | 25 | 7   | 25 | 9↑↑↑       | 32 | 19     | 68 |
| Total          | 468 | 66               | 191    | 41 | 165    | 35 | 198      | 43 | 154 | 33 | 110 | 24 | 45         | 10 | 423    | 90 |

**Note:**

**A** = APC mutation; **P** = TP53 mutation; **K** = KRAS mutation; **N** = NRAS mutation; **K\*** = K or N; (e.g. **AP** = APC mutation + TP53 mutation; **APK\*** = APC mutation + TP53 mutation + KRAS/NRAS mutation). WT AP = WT APC + WT TP53. MUT BRAF = all MSS BRAF mutations

Right = right-sided tumors

d\_Mets = distant metastasis

AD\_muc = 45 adenocarcinoma with mucinous features, including 8 adenocarcinoma, mucinous, 4 adenocarcinoma with focal mucinous features, 1 adenocarcinoma with mucinous differentiation, and 27 adenocarcinoma, mucinous (great than 50% mucinous), 2 adenocarcinoma with signet ring cell features, and 3 Carcinoma, signet ring cell (greater than 50% signet ring cell)

AD\_NOS = 422 adenocarcinoma, NOS and 1 Carcinoma, NOS

\* four tumors without primary location data, percentages were calculated based 464 tumors

\*\* six tumors without stage information, percentages were calculated based 462 tumors; two tumors labeling stage 0 were included as stage I-II.

There is significantly higher or lower observation than expectation: ↑(↓) for p<0.05; ↑↑(↓↓) for p<0.01; ↑↑↑(↓↓↓) for p<0.001; based on individual chi-square (X<sup>2</sup>) contribution from the table cell.

\*\*\*Nonparametric multiple comparison Dunn test was applied for age across the groups.

**Supplementary Table S21. CMS classification results for Moffitt 468**

| <b>Classification</b> | <b>RF Class</b> | <b>SSP Class</b> | <b>N</b> |
|-----------------------|-----------------|------------------|----------|
| CMS1                  | CMS1            | CMS1             | 37       |
| CMS1                  | CMS1            | NA               | 11       |
| CMS1                  | CMS3            | CMS1             | 9        |
| CMS1                  | CMS4            | CMS1             | 3        |
| CMS1                  | NA              | CMS1             | 17       |
| -----                 |                 |                  |          |
| CMS2                  | CMS2            | CMS2             | 96       |
| CMS2                  | CMS2            | NA               | 11       |
| CMS2                  | CMS4            | CMS2             | 1        |
| CMS2                  | NA              | CMS2             | 8        |
| -----                 |                 |                  |          |
| CMS3                  | CMS3            | CMS2             | 15       |
| CMS3                  | CMS3            | CMS3             | 24       |
| CMS3                  | CMS3            | NA               | 25       |
| -----                 |                 |                  |          |
| CMS4                  | CMS4            | CMS4             | 102      |
| CMS4                  | NA              | CMS4             | 10       |
| -----                 |                 |                  |          |
| NA                    | NA              | NA               | 72       |
| NA                    | CMS4            | NA               | 17       |
| -----                 |                 |                  |          |
| ND                    | ND              | ND               | 10       |

*Rules for Resolving Two Classification Methods, with Rationale*

The consensus molecular subtypes classification method describes two different methods, “random forests” (RF), and “single-sample predictor” (SSP). We used both methods to obtain their classifications, and developed the following rules to resolve the discrepancies between the methods.

- 1) 10 patients lacked data for classification. Percentages below based on 458 evaluable samples
- 2) If both RF and SSP agree, that is the CMS classification (N=331, 72%)
- 3) If one method classified the sample into CMS1-CMS3 and the other method was NA, then use the CMS1-3 selection; N=47 (10%), classification determined by RF for this rule, N=35 (8%), classification determined by SSP method
- 4) If RF=CMS4 and SSP = NA, then classify the 17 samples (4%) as NA. 64/116 of our CMS2-classified patients have TP53 mutations with alternate allele rates  $\geq 50\%$  (likely allelic loss), compared to 2/17 of these patients
- 5) There are N=28 (6%) samples for which there were direct CMS classification conflicts. Reasons for selections above:
  - a. CMS1 when RF = CMS3, SSP = CMS1; 8/9 patients were MSI-H, and 5/9 had BRAF mutations, and these are highly CMS1-associated features

- b. CMS3, when RF = CMS3 and SSP = CMS2; 10/15 of the patients have KRAS mutations
- c. CMS1, when RF=CMS4, and SSP = CMS1; all 3 patients are BRAF-mutated MSI-H patients
- d. CMS2, when RF=CMS4, and SSP = CMS2; this patient could have been classified either way



**Supplementary Table S22. Additional Cochran-Mantel-Haenszel test on cetuximab (CTX) response by frequencies of mutAPC and/or mutTP53 in cetuximab-treated CRC PDX models**

**Note:** A— APC mutation; P — TP53 mutation; CR---complete response; PR---partial response; SD---stable disease; PD---progressed disease. The significant *P* values are highlighted by **bolding** and **yellow** color.

Bertotti et al. (2015) 98 CTX CRC PDX models with wild-type APC, TP53, KRAS, NRAS, BRAF and PIK3CA (**PR vs. SD vs. PD**)

| Table of Response by Mutation                       |                                 |                                |                                |       |
|-----------------------------------------------------|---------------------------------|--------------------------------|--------------------------------|-------|
| Response                                            | Mutation                        |                                |                                |       |
| Frequency<br>Expected<br>Cell Chi-Square<br>Row Pct | A + P                           | A or P                         | wtA + wtP                      | Total |
| <b>PR</b>                                           | 19<br>17.133<br>0.2035<br>82.61 | 1<br>2.8163<br>1.1714<br>4.35  | 3<br>3.051<br>0.0009<br>13.04  | 23    |
| <b>SD</b>                                           | 42<br>37.245<br>0.6071<br>84.00 | 5<br>6.1224<br>0.2058<br>10.00 | 3<br>6.6327<br>1.9896<br>6.00  | 50    |
| <b>PD</b>                                           | 12<br>18.622<br>2.3551<br>48.00 | 6<br>3.0612<br>2.8212<br>24.00 | 7<br>3.3163<br>4.0917<br>28.00 | 25    |
| <b>Total</b>                                        | 73                              | 12                             | 13                             | 98    |

| Cochran-Mantel-Haenszel Statistics (Based on Table Scores) |                            |    |        |               |
|------------------------------------------------------------|----------------------------|----|--------|---------------|
| Statistic                                                  | Alternative Hypothesis     | DF | Value  | Prob          |
| <b>1</b>                                                   | <b>Nonzero Correlation</b> | 1  | 6.1351 | <b>0.0133</b> |

1. Sclafani F, Kim TY, Cunningham D, Kim TW, Taberero J, Schmoll HJ, et al. A Randomized Phase II/III Study of Dalotuzumab in Combination With Cetuximab and Irinotecan in Chemorefractory, KRAS Wild-Type, Metastatic Colorectal Cancer. *Journal of the National Cancer Institute*. 2015;107(12):djv258.
2. Khambata-Ford S, Garrett CR, Meropol NJ, Basik M, Harbison CT, Wu S, et al. Expression of epiregulin and amphiregulin and K-ras mutation status predict disease control in metastatic colorectal cancer patients treated with cetuximab. *J Clin Oncol*. 2007;25(22):3230-7.
3. Medico E, Russo M, Picco G, Cancelliere C, Valtorta E, Corti G, et al. The molecular landscape of colorectal cancer cell lines unveils clinically actionable kinase targets. *Nat Commun*. 2015;6:7002.
4. Schell MJ, Yang M, Missiaglia E, Delorenzi M, Sonesson C, Yue B, et al. A Composite Gene Expression Signature Optimizes Prediction of Colorectal Cancer Metastasis and Outcome. *Clin Cancer Res*. 2016;22(3):734-45.
5. Schell MJ, Yang M, Teer JK, Lo FY, Madan A, Coppola D, et al. A multigene mutation classification of 468 colorectal cancers reveals a prognostic role for APC. *Nat Commun*. 2016;7:11743.
6. Cancer Genome Atlas N. Comprehensive molecular characterization of human colon and rectal cancer. *Nature*. 2012;487(7407):330-7.
7. Grossman RL, Heath AP, Ferretti V, Varmus HE, Lowy DR, Kibbe WA, et al. Toward a Shared Vision for Cancer Genomic Data. *The New England journal of medicine*. 2016;375(12):1109-12.
8. Marisa L, de Reynies A, Duval A, Selves J, Gaub MP, Vescovo L, et al. Gene expression classification of colon cancer into molecular subtypes: characterization, validation, and prognostic value. *PLoS medicine*. 2013;10(5):e1001453.
9. Julien S, Merino-Trigo A, Lacroix L, Pocard M, Goere D, Mariani P, et al. Characterization of a large panel of patient-derived tumor xenografts representing the clinical heterogeneity of human colorectal cancer. *Clinical cancer research : an official journal of the American Association for Cancer Research*. 2012;18(19):5314-28.
10. Bertotti A, Papp E, Jones S, Adleff V, Anagnostou V, Lupo B, et al. The genomic landscape of response to EGFR blockade in colorectal cancer. *Nature*. 2015;526(7572):263-7.
11. Hochberg Y, Benjamini Y. More powerful procedures for multiple significance testing. *Stat Med*. 1990;9(7):811-8.
12. Holm S. A simple sequentially rejective multiple test procedure. *Scandinavian Journal of Statistics*. 1979;6(2):65-70.
13. Guinney J, Dienstmann R, Wang X, de Reynies A, Schlicker A, Sonesson C, et al. The consensus molecular subtypes of colorectal cancer. *Nature medicine*. 2015;21(11):1350-6.
14. Herbst A, Jurinovic V, Krebs S, Thieme SE, Blum H, Goke B, et al. Comprehensive analysis of beta-catenin target genes in colorectal carcinoma cell lines with deregulated Wnt/beta-catenin signaling. *BMC genomics*. 2014;15:74.
15. Dry JR, Pavey S, Pratilas CA, Harbron C, Runswick S, Hodgson D, et al. Transcriptional pathway signatures predict MEK addiction and response to selumetinib (AZD6244). *Cancer Res*. 2010;70(6):2264-73.
